# Supplementary material for: Mono- and multi-nucleated ventricular cardiomyocytes constitute a transcriptionally homogenous cell population
Source: Basic Res Cardiol. 2019 Aug 9;114(5):36. doi: 10.1007/s00395-019-0744-z (PMC6689038; doi:10.1007/s00395-019-0744-z)
Supplement: Supplementary file 2 — Supplementary material 1 [file 395_2019_744_MOESM2_ESM.xlsx]

## Sheet: Supplementary table 1
Supplementary table 1 - Differentially expressed genes between WT (basal) and TAC cardiomyocytes (FDR < 0.05)
ENSEMBL_geneID	log-fold-change	FDR	Expression_TAC	Expression_WT	Gene_Symbol	Biotype	Description
ENSMUSG00000022528	-4.32106	6.83239e-16	6.52665	2.72232	Hes1	protein_coding	hairy and enhancer of split 1 (Drosophila) [Source:MGI Symbol;Acc:MGI:104853]
ENSMUSG00000031762	-2.80559	1.93435e-11	4.62225	1.31604	Mt2	protein_coding	metallothionein 2 [Source:MGI Symbol;Acc:MGI:97172]
ENSMUSG00000037266	1.10325	1.98196e-09	1.12921	3.79254	Rsrp1	protein_coding	arginine/serine rich protein 1 [Source:MGI Symbol;Acc:MGI:106498]
ENSMUSG00000028223	1.83216	4.75655e-07	6.76483	8.76771	Decr1	protein_coding	2,4-dienoyl CoA reductase 1, mitochondrial [Source:MGI Symbol;Acc:MGI:1914710]
ENSMUSG00000024803	-1.98914	1.03876e-06	9.67076	7.8449	Ankrd1	protein_coding	ankyrin repeat domain 1 (cardiac muscle) [Source:MGI Symbol;Acc:MGI:1097717]
ENSMUSG00000031972	-2.47279	2.26208e-06	9.10798	6.59023	Acta1	protein_coding	actin, alpha 1, skeletal muscle [Source:MGI Symbol;Acc:MGI:87902]
ENSMUSG00000038418	-2.27474	9.71251e-06	6.6924	4.52826	Egr1	protein_coding	early growth response 1 [Source:MGI Symbol;Acc:MGI:95295]
ENSMUSG00000020423	-2.37125	3.97747e-05	6.06098	3.84591	Btg2	protein_coding	B cell translocation gene 2, anti-proliferative [Source:MGI Symbol;Acc:MGI:108384]
ENSMUSG00000053560	-1.81587	0.000148725	3.3367	1.24559	Ier2	protein_coding	immediate early response 2 [Source:MGI Symbol;Acc:MGI:104815]
ENSMUSG00000025408	-1.70021	0.000208116	3.20127	1.30384	Ddit3	protein_coding	DNA-damage inducible transcript 3 [Source:MGI Symbol;Acc:MGI:109247]
ENSMUSG00000052837	-1.14487	0.000382992	2.83589	1.20063	Junb	protein_coding	jun B proto-oncogene [Source:MGI Symbol;Acc:MGI:96647]
ENSMUSG00000037573	-1.60701	0.000613333	3.93305	1.84747	Tob1	protein_coding	transducer of ErbB-2.1 [Source:MGI Symbol;Acc:MGI:1349721]
ENSMUSG00000026414	0.529596	0.000633585	15.4545	15.9686	Tnnt2	protein_coding	troponin T2, cardiac [Source:MGI Symbol;Acc:MGI:104597]
ENSMUSG00000028461	-1.49104	0.0020494	3.54057	1.60411	Ccdc107	protein_coding	coiled-coil domain containing 107 [Source:MGI Symbol;Acc:MGI:1913423]
ENSMUSG00000063856	-0.711239	0.0020494	3.23772	1.43296	Gpx1	protein_coding	glutathione peroxidase 1 [Source:MGI Symbol;Acc:MGI:104887]
ENSMUSG00000053113	-0.692504	0.00287926	1.82396	0.669668	Socs3	protein_coding	suppressor of cytokine signaling 3 [Source:MGI Symbol;Acc:MGI:1201791]
ENSMUSG00000019577	-2.65873	0.0029194	5.76684	3.86501	Pdk4	protein_coding	pyruvate dehydrogenase kinase, isoenzyme 4 [Source:MGI Symbol;Acc:MGI:1351481]
ENSMUSG00000020737	-2.11927	0.0029194	5.28007	3.46527	Jpt1	protein_coding	Jupiter microtubule associated homolog 1 [Source:MGI Symbol;Acc:MGI:1096361]
ENSMUSG00000061904	0.644814	0.00310475	11.1582	11.8216	Slc25a3	protein_coding	solute carrier family 25 (mitochondrial carrier, phosphate carrier), member 3 [Source:MGI Symbol;Acc:MGI:1353498]
ENSMUSG00000060036	-1.58398	0.00310475	3.59331	1.81353	Rpl3	protein_coding	ribosomal protein L3 [Source:MGI Symbol;Acc:MGI:1351605]
ENSMUSG00000067653	-1.24474	0.00310475	8.9321	7.84372	Ankrd23	protein_coding	ankyrin repeat domain 23 [Source:MGI Symbol;Acc:MGI:1925571]
ENSMUSG00000024507	-1.06618	0.00310475	3.44574	2.65494	Hsd17b4	protein_coding	hydroxysteroid (17-beta) dehydrogenase 4 [Source:MGI Symbol;Acc:MGI:105089]
ENSMUSG00000064351	0.649029	0.00327729	16.7791	17.3837	mt-Co1	protein_coding	mitochondrially encoded cytochrome c oxidase I [Source:MGI Symbol;Acc:MGI:102504]
ENSMUSG00000040731	-1.39394	0.00414836	4.48905	2.94781	Eif4h	protein_coding	eukaryotic translation initiation factor 4H [Source:MGI Symbol;Acc:MGI:1341822]
ENSMUSG00000038059	-0.0809836	0.00443868	1.04463	0.414788	Smim3	protein_coding	small integral membrane protein 3 [Source:MGI Symbol;Acc:MGI:1917088]
ENSMUSG00000079243	-1.85463	0.00461146	3.71717	2.30869	Xirp1	protein_coding	xin actin-binding repeat containing 1 [Source:MGI Symbol;Acc:MGI:1333878]
ENSMUSG00000000325	-2.76342	0.00497098	5.37755	3.18092	Arvcf	protein_coding	armadillo repeat gene deleted in velocardiofacial syndrome [Source:MGI Symbol;Acc:MGI:109620]
ENSMUSG00000032667	-1.24354	0.00518575	2.19494	0.715825	Pon2	protein_coding	paraoxonase 2 [Source:MGI Symbol;Acc:MGI:106687]
ENSMUSG00000041241	-1.05894	0.00518575	3.10295	2.01867	Mul1	protein_coding	mitochondrial ubiquitin ligase activator of NFKB 1 [Source:MGI Symbol;Acc:MGI:1915600]
ENSMUSG00000037465	-0.313495	0.00585957	1.2366	0.217623	Klf10	protein_coding	Kruppel-like factor 10 [Source:MGI Symbol;Acc:MGI:1101353]
ENSMUSG00000038894	-1.24101	0.00715276	2.17372	0.688468	Irs2	protein_coding	insulin receptor substrate 2 [Source:MGI Symbol;Acc:MGI:109334]
ENSMUSG00000028195	-2.10128	0.00800125	5.43335	3.67172	Cyr61	protein_coding	cysteine rich protein 61 [Source:MGI Symbol;Acc:MGI:88613]
ENSMUSG00000001100	-1.55627	0.00800125	4.12807	3.35984	Poldip2	protein_coding	polymerase (DNA-directed), delta interacting protein 2 [Source:MGI Symbol;Acc:MGI:1915061]
ENSMUSG00000046034	-1.26143	0.00800125	2.38297	0.869859	Otulin	protein_coding	OTU deubiquitinase with linear linkage specificity [Source:MGI Symbol;Acc:MGI:3577015]
ENSMUSG00000025499	-1.84591	0.00829589	4.59625	2.4913	Hras	protein_coding	Harvey rat sarcoma virus oncogene [Source:MGI Symbol;Acc:MGI:96224]
ENSMUSG00000029167	-1.69195	0.00867574	4.21005	2.86202	Ppargc1a	protein_coding	peroxisome proliferative activated receptor, gamma, coactivator 1 alpha [Source:MGI Symbol;Acc:MGI:1342774]
ENSMUSG00000030560	0.0868209	0.0101749	0.464437	0.780163	Ctsc	protein_coding	cathepsin C [Source:MGI Symbol;Acc:MGI:109553]
ENSMUSG00000022951	-2.2875	0.0108551	4.9277	2.87406	Rcan1	protein_coding	regulator of calcineurin 1 [Source:MGI Symbol;Acc:MGI:1890564]
ENSMUSG00000044786	-1.59619	0.0108551	3.97238	2.23923	Zfp36	protein_coding	zinc finger protein 36 [Source:MGI Symbol;Acc:MGI:99180]
ENSMUSG00000000326	-2.12543	0.0110474	6.62074	4.77938	Comt	protein_coding	catechol-O-methyltransferase [Source:MGI Symbol;Acc:MGI:88470]
ENSMUSG00000005732	-1.47743	0.012053	3.33379	1.50453	Ranbp1	protein_coding	RAN binding protein 1 [Source:MGI Symbol;Acc:MGI:96269]
ENSMUSG00000035849	-1.19436	0.012053	2.31544	0.997355	Krt222	protein_coding	keratin 222 [Source:MGI Symbol;Acc:MGI:2442728]
ENSMUSG00000029131	-2.00173	0.0125857	4.72649	3.37653	Dnajb6	protein_coding	DnaJ heat shock protein family (Hsp40) member B6 [Source:MGI Symbol;Acc:MGI:1344381]
ENSMUSG00000049907	-0.764072	0.013162	2.21144	0.930943	Rasl11b	protein_coding	RAS-like, family 11, member B [Source:MGI Symbol;Acc:MGI:1916189]
ENSMUSG00000024240	-0.884694	0.0134391	1.53926	0.209206	Epc1	protein_coding	enhancer of polycomb homolog 1 (Drosophila) [Source:MGI Symbol;Acc:MGI:1278322]
ENSMUSG00000019849	-0.393468	0.0134391	1.96836	1.97773	Prep	protein_coding	prolyl endopeptidase [Source:MGI Symbol;Acc:MGI:1270863]
ENSMUSG00000021109	-1.61455	0.0140825	3.66097	1.75713	Hif1a	protein_coding	hypoxia inducible factor 1, alpha subunit [Source:MGI Symbol;Acc:MGI:106918]
ENSMUSG00000047656	-0.23719	0.0140825	1.05136	0.157277	Trpt1	protein_coding	tRNA phosphotransferase 1 [Source:MGI Symbol;Acc:MGI:1333115]
ENSMUSG00000062694	-1.86049	0.0147154	3.85341	2.18881	Cav3	protein_coding	caveolin 3 [Source:MGI Symbol;Acc:MGI:107570]
ENSMUSG00000049134	-2.35446	0.0148067	9.36183	7.81058	Nrap	protein_coding	nebulin-related anchoring protein [Source:MGI Symbol;Acc:MGI:1098765]
ENSMUSG00000019578	-1.54845	0.0148067	3.30957	1.67652	Ubxn6	protein_coding	UBX domain protein 6 [Source:MGI Symbol;Acc:MGI:1913780]
ENSMUSG00000045973	-0.888589	0.0152705	2.96852	1.86149	Slc25a51	protein_coding	solute carrier family 25, member 51 [Source:MGI Symbol;Acc:MGI:2684984]
ENSMUSG00000028719	-0.724377	0.0152705	1.93975	0.674694	Cmpk1	protein_coding	cytidine monophosphate (UMP-CMP) kinase 1 [Source:MGI Symbol;Acc:MGI:1913838]
ENSMUSG00000027823	-0.476551	0.0152705	2.81655	3.00368	Gmps	protein_coding	guanine monophosphate synthetase [Source:MGI Symbol;Acc:MGI:2448526]
ENSMUSG00000021288	-0.567723	0.0162062	2.23797	0.941318	Klc1	protein_coding	kinesin light chain 1 [Source:MGI Symbol;Acc:MGI:107978]
ENSMUSG00000067038	-1.11145	0.0166743	3.04728	2.37698	Rps12-ps3	protein_coding	ribosomal protein S12, pseudogene 3 [Source:MGI Symbol;Acc:MGI:3704503]
ENSMUSG00000033377	-0.986517	0.0171898	2.66143	1.75306	Palmd	protein_coding	palmdelphin [Source:MGI Symbol;Acc:MGI:2148896]
ENSMUSG00000028788	-1.20182	0.0174383	7.1687	7.65784	Ptp4a2	protein_coding	protein tyrosine phosphatase 4a2 [Source:MGI Symbol;Acc:MGI:1277117]
ENSMUSG00000063200	-0.170117	0.0174383	4.11626	5.15097	Nol7	protein_coding	nucleolar protein 7 [Source:MGI Symbol;Acc:MGI:1917328]
ENSMUSG00000021134	-2.28334	0.0177797	5.99916	3.9924	Srsf5	protein_coding	serine/arginine-rich splicing factor 5 [Source:MGI Symbol;Acc:MGI:98287]
ENSMUSG00000091971	0.510928	0.0179088	0.230953	1.33939	Hspa1a	protein_coding	heat shock protein 1A [Source:MGI Symbol;Acc:MGI:96244]
ENSMUSG00000025786	-0.0792594	0.0190217	0.605242	0.288079	Zdhhc3	protein_coding	zinc finger, DHHC domain containing 3 [Source:MGI Symbol;Acc:MGI:1926134]
ENSMUSG00000038764	-0.539804	0.0192017	1.7776	0.581047	Ptpn3	protein_coding	protein tyrosine phosphatase, non-receptor type 3 [Source:MGI Symbol;Acc:MGI:105307]
ENSMUSG00000037580	NA	0.0193189	0.414933	0	Gch1	protein_coding	GTP cyclohydrolase 1 [Source:MGI Symbol;Acc:MGI:95675]
ENSMUSG00000029467	0.418265	0.0193189	12.4834	12.9399	Atp2a2	protein_coding	ATPase, Ca++ transporting, cardiac muscle, slow twitch 2 [Source:MGI Symbol;Acc:MGI:88110]
ENSMUSG00000026784	-0.427494	0.0193189	1.04035	0.162248	Pdss1	protein_coding	prenyl (solanesyl) diphosphate synthase, subunit 1 [Source:MGI Symbol;Acc:MGI:1889278]
ENSMUSG00000035575	-0.272564	0.0193189	1.09222	0.348227	Utp6	protein_coding	UTP6 small subunit processome component [Source:MGI Symbol;Acc:MGI:2445193]
ENSMUSG00000025907	-1.62238	0.0193944	4.39147	3.03153	Rb1cc1	protein_coding	RB1-inducible coiled-coil 1 [Source:MGI Symbol;Acc:MGI:1341850]
ENSMUSG00000030663	-0.222944	0.0193944	4.02935	4.8343	1110004F10Rik	protein_coding	RIKEN cDNA 1110004F10 gene [Source:MGI Symbol;Acc:MGI:1929274]
ENSMUSG00000026657	-0.323042	0.019529	0.932404	0.0070884	Frmd4a	protein_coding	FERM domain containing 4A [Source:MGI Symbol;Acc:MGI:1919850]
ENSMUSG00000030282	-0.760258	0.0214536	2.12758	0.96659	Cmas	protein_coding	cytidine monophospho-N-acetylneuraminic acid synthetase [Source:MGI Symbol;Acc:MGI:1337124]
ENSMUSG00000031568	-0.639192	0.0214536	2.65357	1.48317	Rwdd4a	protein_coding	RWD domain containing 4A [Source:MGI Symbol;Acc:MGI:2681000]
ENSMUSG00000037656	0.227969	0.0222088	2.19731	3.17686	Slc20a2	protein_coding	solute carrier family 20, member 2 [Source:MGI Symbol;Acc:MGI:97851]
ENSMUSG00000044502	-1.45309	0.0228238	4.32326	3.66809	Bod1	protein_coding	biorientation of chromosomes in cell division 1 [Source:MGI Symbol;Acc:MGI:1916806]
ENSMUSG00000032562	-1.48753	0.0233851	3.42974	2.39791	Gnai2	protein_coding	guanine nucleotide binding protein (G protein), alpha inhibiting 2 [Source:MGI Symbol;Acc:MGI:95772]
ENSMUSG00000061118	-1.48477	0.0237433	2.74587	1.33735	Dnajc30	protein_coding	DnaJ heat shock protein family (Hsp40) member C30 [Source:MGI Symbol;Acc:MGI:1913364]
ENSMUSG00000006221	-1.36152	0.0237433	3.12939	1.89791	Hspb7	protein_coding	heat shock protein family, member 7 (cardiovascular) [Source:MGI Symbol;Acc:MGI:1352494]
ENSMUSG00000049265	-0.99491	0.0237433	4.61299	4.70383	Kcnk3	protein_coding	potassium channel, subfamily K, member 3 [Source:MGI Symbol;Acc:MGI:1100509]
ENSMUSG00000043155	NA	0.0241684	0.389894	0	Hpdl	protein_coding	4-hydroxyphenylpyruvate dioxygenase-like [Source:MGI Symbol;Acc:MGI:2444646]
ENSMUSG00000022707	-1.07782	0.0241684	3.28131	1.97692	Gbe1	protein_coding	glucan (1,4-alpha-), branching enzyme 1 [Source:MGI Symbol;Acc:MGI:1921435]
ENSMUSG00000013646	-0.170626	0.0241684	0.822542	0.748959	Sh3bp5l	protein_coding	SH3 binding domain protein 5 like [Source:MGI Symbol;Acc:MGI:1933124]
ENSMUSG00000000346	-2.13036	0.0260439	5.04308	3.38021	Dazap2	protein_coding	DAZ associated protein 2 [Source:MGI Symbol;Acc:MGI:1344344]
ENSMUSG00000030802	-2.49733	0.026072	5.86872	4.31131	Bckdk	protein_coding	branched chain ketoacid dehydrogenase kinase [Source:MGI Symbol;Acc:MGI:1276121]
ENSMUSG00000057113	-2.88428	0.0264653	6.73925	4.87254	Npm1	protein_coding	nucleophosmin 1 [Source:MGI Symbol;Acc:MGI:106184]
ENSMUSG00000020644	-0.965299	0.0277332	2.40349	0.939239	Id2	protein_coding	inhibitor of DNA binding 2 [Source:MGI Symbol;Acc:MGI:96397]
ENSMUSG00000020368	-1.00934	0.0297873	8.4455	7.34998	Canx	protein_coding	calnexin [Source:MGI Symbol;Acc:MGI:88261]
ENSMUSG00000075266	NA	0.030514	0.377797	0	Cenpw	protein_coding	centromere protein W [Source:MGI Symbol;Acc:MGI:1913561]
ENSMUSG00000057278	-0.817592	0.030514	2.04249	0.844108	Snrpg	protein_coding	small nuclear ribonucleoprotein polypeptide G [Source:MGI Symbol;Acc:MGI:1915261]
ENSMUSG00000028277	-0.604314	0.030514	1.37549	0.360631	Ube2j1	protein_coding	ubiquitin-conjugating enzyme E2J 1 [Source:MGI Symbol;Acc:MGI:1926245]
ENSMUSG00000055148	-0.364773	0.030514	2.10984	1.07373	Klf2	protein_coding	Kruppel-like factor 2 (lung) [Source:MGI Symbol;Acc:MGI:1342772]
ENSMUSG00000020937	NA	0.0310809	0.34499	0	Plcd3	protein_coding	phospholipase C, delta 3 [Source:MGI Symbol;Acc:MGI:107451]
ENSMUSG00000045316	-1.97437	0.0321358	4.75964	3.34566	Fahd1	protein_coding	fumarylacetoacetate hydrolase domain containing 1 [Source:MGI Symbol;Acc:MGI:1915886]
ENSMUSG00000031641	-1.24615	0.0321358	3.57461	2.13736	Cbr4	protein_coding	carbonyl reductase 4 [Source:MGI Symbol;Acc:MGI:2384567]
ENSMUSG00000036138	-1.19041	0.0324591	3.48883	2.48882	Acaa1a	protein_coding	acetyl-Coenzyme A acyltransferase 1A [Source:MGI Symbol;Acc:MGI:2148491]
ENSMUSG00000017299	-0.254097	0.0324591	1.38135	1.06227	Dnttip1	protein_coding	deoxynucleotidyltransferase, terminal, interacting protein 1 [Source:MGI Symbol;Acc:MGI:1923483]
ENSMUSG00000022420	-0.194831	0.0324591	1.13668	1.0861	Dnal4	protein_coding	dynein, axonemal, light chain 4 [Source:MGI Symbol;Acc:MGI:1859217]
ENSMUSG00000055491	NA	0.0341971	0.469097	0	Pprc1	protein_coding	peroxisome proliferative activated receptor, gamma, coactivator-related 1 [Source:MGI Symbol;Acc:MGI:2385096]
ENSMUSG00000027523	0.465704	0.0341971	9.9117	9.84308	Gnas	protein_coding	GNAS (guanine nucleotide binding protein, alpha stimulating) complex locus [Source:MGI Symbol;Acc:MGI:95777]
ENSMUSG00000008035	-1.68077	0.0341971	4.51247	2.90958	Mid1ip1	protein_coding	Mid1 interacting protein 1 (gastrulation specific G12-like (zebrafish)) [Source:MGI Symbol;Acc:MGI:1915291]
ENSMUSG00000023905	-1.46116	0.0341971	3.25943	1.57505	Tnfrsf12a	protein_coding	tumor necrosis factor receptor superfamily, member 12a [Source:MGI Symbol;Acc:MGI:1351484]
ENSMUSG00000043091	-1.10775	0.035248	3.1849	1.9284	Tuba1c	protein_coding	tubulin, alpha 1C [Source:MGI Symbol;Acc:MGI:1095409]
ENSMUSG00000020530	-1.5252	0.0354261	4.76202	3.04589	Ggnbp2	protein_coding	gametogenetin binding protein 2 [Source:MGI Symbol;Acc:MGI:2387356]
ENSMUSG00000020321	0.53382	0.0369918	9.72632	10.308	Mdh1	protein_coding	malate dehydrogenase 1, NAD (soluble) [Source:MGI Symbol;Acc:MGI:97051]
ENSMUSG00000021114	-1.31074	0.037286	4.48405	4.19498	Atp6v1d	protein_coding	ATPase, H+ transporting, lysosomal V1 subunit D [Source:MGI Symbol;Acc:MGI:1921084]
ENSMUSG00000054079	NA	0.0373214	0.454156	0	Utp18	protein_coding	UTP18 small subunit processome component [Source:MGI Symbol;Acc:MGI:1923402]
ENSMUSG00000038583	0.440061	0.0374151	12.6741	13.1448	Pln	protein_coding	phospholamban [Source:MGI Symbol;Acc:MGI:97622]
ENSMUSG00000055943	-0.745156	0.0374151	2.56468	1.46395	Emc7	protein_coding	ER membrane protein complex subunit 7 [Source:MGI Symbol;Acc:MGI:1920274]
ENSMUSG00000022706	-0.742051	0.0374151	2.54599	1.86588	Mrpl40	protein_coding	mitochondrial ribosomal protein L40 [Source:MGI Symbol;Acc:MGI:1332635]
ENSMUSG00000031820	-0.724612	0.0374151	2.79338	2.48646	Babam1	protein_coding	BRISC and BRCA1 A complex member 1 [Source:MGI Symbol;Acc:MGI:1915501]
ENSMUSG00000019820	-1.23423	0.037448	3.22912	1.68265	Utrn	protein_coding	utrophin [Source:MGI Symbol;Acc:MGI:104631]
ENSMUSG00000033845	-2.03227	0.0382351	4.93069	3.69187	Mrpl15	protein_coding	mitochondrial ribosomal protein L15 [Source:MGI Symbol;Acc:MGI:1351639]
ENSMUSG00000009630	-0.446992	0.0382351	0.914601	0.132568	Ppp2cb	protein_coding	protein phosphatase 2 (formerly 2A), catalytic subunit, beta isoform [Source:MGI Symbol;Acc:MGI:1321161]
ENSMUSG00000028834	-2.71172	0.0388538	6.33679	4.75343	Trim63	protein_coding	tripartite motif-containing 63 [Source:MGI Symbol;Acc:MGI:2447992]
ENSMUSG00000021131	-0.76745	0.0392608	2.18387	1.21584	Erh	protein_coding	enhancer of rudimentary homolog (Drosophila) [Source:MGI Symbol;Acc:MGI:108089]
ENSMUSG00000039376	-2.40507	0.0392684	6.47903	4.80416	Synpo2l	protein_coding	synaptopodin 2-like [Source:MGI Symbol;Acc:MGI:1916010]
ENSMUSG00000023106	-2.04561	0.0392684	4.71708	3.27701	Denr	protein_coding	density-regulated protein [Source:MGI Symbol;Acc:MGI:1915434]
ENSMUSG00000018102	-1.87232	0.0392684	4.51628	3.32615	Hist1h2bc	protein_coding	histone cluster 1, H2bc [Source:MGI Symbol;Acc:MGI:1915274]
ENSMUSG00000066637	-1.11843	0.0392684	3.05637	2.04627	Ttc32	protein_coding	tetratricopeptide repeat domain 32 [Source:MGI Symbol;Acc:MGI:1922766]
ENSMUSG00000001911	-1.01283	0.0392684	3.44937	2.87091	Nfix	protein_coding	nuclear factor I/X [Source:MGI Symbol;Acc:MGI:97311]
ENSMUSG00000035992	-0.881271	0.0392684	3.02045	2.03537	Fnip1	protein_coding	folliculin interacting protein 1 [Source:MGI Symbol;Acc:MGI:2444668]
ENSMUSG00000024654	-0.789711	0.0392684	2.83109	1.72765	Asrgl1	protein_coding	asparaginase like 1 [Source:MGI Symbol;Acc:MGI:1913764]
ENSMUSG00000005836	-0.786926	0.0392684	3.19135	2.76276	Gata6	protein_coding	GATA binding protein 6 [Source:MGI Symbol;Acc:MGI:107516]
ENSMUSG00000029684	-0.570839	0.0392684	1.27591	0.301478	Wasl	protein_coding	Wiskott-Aldrich syndrome-like (human) [Source:MGI Symbol;Acc:MGI:1920428]
ENSMUSG00000048154	-0.303178	0.0393473	1.14679	0.345259	Kmt2d	protein_coding	lysine (K)-specific methyltransferase 2D [Source:MGI Symbol;Acc:MGI:2682319]
ENSMUSG00000021139	-0.627001	0.0403591	2.84132	1.85081	Gm20498	protein_coding	predicted gene 20498 [Source:MGI Symbol;Acc:MGI:5141963]
ENSMUSG00000062190	-0.241094	0.0405104	0.82993	0.298282	Lancl2	protein_coding	LanC (bacterial lantibiotic synthetase component C)-like 2 [Source:MGI Symbol;Acc:MGI:1919085]
ENSMUSG00000021470	NA	0.0409472	0.490194	0	Ercc6l2	protein_coding	excision repair cross-complementing rodent repair deficiency, complementation group 6 like 2 [Source:MGI Symbol;Acc:MGI:1923501]
ENSMUSG00000047821	NA	0.0409472	0.429688	0	Trim16	protein_coding	tripartite motif-containing 16 [Source:MGI Symbol;Acc:MGI:2137356]
ENSMUSG00000029059	-2.23917	0.0409472	6.2979	5.19699	Fam213b	protein_coding	family with sequence similarity 213, member B [Source:MGI Symbol;Acc:MGI:1913719]
ENSMUSG00000043683	-1.72489	0.0409472	5.42925	4.04892	Fem1a	protein_coding	feminization 1 homolog a (C. elegans) [Source:MGI Symbol;Acc:MGI:1335089]
ENSMUSG00000025544	-1.52783	0.0409472	4.45496	3.50616	Tm9sf2	protein_coding	transmembrane 9 superfamily member 2 [Source:MGI Symbol;Acc:MGI:1915309]
ENSMUSG00000029864	-1.16163	0.0409472	3.99091	3.1628	Gstk1	protein_coding	glutathione S-transferase kappa 1 [Source:MGI Symbol;Acc:MGI:1923513]
ENSMUSG00000020634	-1.10171	0.0409472	3.76934	2.87012	Ubxn2a	protein_coding	UBX domain protein 2A [Source:MGI Symbol;Acc:MGI:2442310]
ENSMUSG00000028737	-1.04298	0.0409472	3.38396	2.49089	Aldh4a1	protein_coding	aldehyde dehydrogenase 4 family, member A1 [Source:MGI Symbol;Acc:MGI:2443883]
ENSMUSG00000040723	-1.00359	0.0409472	3.00492	2.14162	Rcsd1	protein_coding	RCSD domain containing 1 [Source:MGI Symbol;Acc:MGI:2676394]
ENSMUSG00000038619	-0.921485	0.0409472	3.28075	2.02968	Ensa	protein_coding	endosulfine alpha [Source:MGI Symbol;Acc:MGI:1891189]
ENSMUSG00000049755	-0.895409	0.0409472	2.1285	0.715971	Zfp672	protein_coding	zinc finger protein 672 [Source:MGI Symbol;Acc:MGI:2442105]
ENSMUSG00000022964	-0.888395	0.0409472	2.55636	1.61385	Tmem50b	protein_coding	transmembrane protein 50B [Source:MGI Symbol;Acc:MGI:1925225]
ENSMUSG00000030421	-0.526711	0.0409472	1.11162	0.30175	Uri1	protein_coding	URI1, prefoldin-like chaperone [Source:MGI Symbol;Acc:MGI:1342294]
ENSMUSG00000043207	-0.488415	0.0409472	1.80645	1.01965	Zmpste24	protein_coding	zinc metallopeptidase, STE24 [Source:MGI Symbol;Acc:MGI:1890508]
ENSMUSG00000014550	-0.461749	0.0409472	0.758756	0.0472704	Rbsn	protein_coding	rabenosyn, RAB effector [Source:MGI Symbol;Acc:MGI:1925537]
ENSMUSG00000055053	-0.824249	0.0424178	2.72928	1.635	Nfic	protein_coding	nuclear factor I/C [Source:MGI Symbol;Acc:MGI:109591]
ENSMUSG00000061032	-1.15964	0.0426978	3.31745	2.45966	Rrp1	protein_coding	ribosomal RNA processing 1 homolog (S. cerevisiae) [Source:MGI Symbol;Acc:MGI:1203500]
ENSMUSG00000027544	NA	0.0431465	0.353362	0	Nfatc2	protein_coding	nuclear factor of activated T cells, cytoplasmic, calcineurin dependent 2 [Source:MGI Symbol;Acc:MGI:102463]
ENSMUSG00000079557	-1.39756	0.0431465	3.79539	2.3557	2002-03-01	protein_coding	membrane-associated ring finger (C3HC4) 2 [Source:MGI Symbol;Acc:MGI:1925915]
ENSMUSG00000019373	-0.945077	0.0447045	3.38963	3.07869	Cops3	protein_coding	COP9 signalosome subunit 3 [Source:MGI Symbol;Acc:MGI:1349409]
ENSMUSG00000033047	-1.31589	0.0448035	3.81526	2.4573	Eif3l	protein_coding	eukaryotic translation initiation factor 3, subunit L [Source:MGI Symbol;Acc:MGI:2386251]
ENSMUSG00000061838	-1.79727	0.0453024	5.16937	4.21485	Suclg2	protein_coding	succinate-Coenzyme A ligase, GDP-forming, beta subunit [Source:MGI Symbol;Acc:MGI:1306824]
ENSMUSG00000033161	0.738406	0.0454951	7.1571	7.89969	Atp1a1	protein_coding	ATPase, Na+/K+ transporting, alpha 1 polypeptide [Source:MGI Symbol;Acc:MGI:88105]
ENSMUSG00000022641	0.00846118	0.0454951	1.26313	1.65793	Bbx	protein_coding	bobby sox HMG box containing [Source:MGI Symbol;Acc:MGI:1917758]
ENSMUSG00000109510	-1.6562	0.0454951	7.6893	6.62923	Gm42417	protein_coding	predicted gene, 42417 [Source:MGI Symbol;Acc:MGI:5649003]
ENSMUSG00000028759	-1.55857	0.0454951	4.63868	3.27053	Hp1bp3	protein_coding	heterochromatin protein 1, binding protein 3 [Source:MGI Symbol;Acc:MGI:109369]
ENSMUSG00000034173	-0.755437	0.0454951	4.18815	4.0217	Zbed5	protein_coding	zinc finger, BED type containing 5 [Source:MGI Symbol;Acc:MGI:1919220]
ENSMUSG00000106864	-0.320084	0.0457354	1.25545	1.05592	Gtf3c2	protein_coding	general transcription factor IIIC, polypeptide 2, beta [Source:MGI Symbol;Acc:MGI:1919002]
ENSMUSG00000021830	-0.150193	0.0457354	0.849266	0.503776	Txndc16	protein_coding	thioredoxin domain containing 16 [Source:MGI Symbol;Acc:MGI:1917811]
ENSMUSG00000034566	0.488901	0.046556	12.7423	13.2574	Atp5h	protein_coding	ATP synthase, H+ transporting, mitochondrial F0 complex, subunit D [Source:MGI Symbol;Acc:MGI:1918929]
ENSMUSG00000033128	-0.386099	0.046556	1.71431	0.990261	Gga1	protein_coding	golgi associated, gamma adaptin ear containing, ARF binding protein 1 [Source:MGI Symbol;Acc:MGI:2146207]
ENSMUSG00000026605	0.442747	0.0467064	0.998322	2.32309	Cenpf	protein_coding	centromere protein F [Source:MGI Symbol;Acc:MGI:1313302]
ENSMUSG00000032826	-1.19568	0.0467064	4.18662	3.47527	Ank2	protein_coding	ankyrin 2, brain [Source:MGI Symbol;Acc:MGI:88025]
ENSMUSG00000034201	NA	0.0468467	0.406965	0	Gas2l1	protein_coding	growth arrest-specific 2 like 1 [Source:MGI Symbol;Acc:MGI:1926176]
ENSMUSG00000038729	-2.14317	0.0468467	5.2303	3.2346	Akap2	protein_coding	A kinase (PRKA) anchor protein 2 [Source:MGI Symbol;Acc:MGI:1306795]
ENSMUSG00000021775	-1.64236	0.0468467	3.11635	1.62812	Nr1d2	protein_coding	nuclear receptor subfamily 1, group D, member 2 [Source:MGI Symbol;Acc:MGI:2449205]
ENSMUSG00000027108	-1.22447	0.0468467	3.63124	2.90065	Ola1	protein_coding	Obg-like ATPase 1 [Source:MGI Symbol;Acc:MGI:1914309]
ENSMUSG00000050199	-1.04124	0.0468467	2.09943	0.761882	Lgr4	protein_coding	leucine-rich repeat-containing G protein-coupled receptor 4 [Source:MGI Symbol;Acc:MGI:1891468]
ENSMUSG00000029422	-0.997314	0.0468467	3.85778	3.5861	Rsrc2	protein_coding	arginine/serine-rich coiled-coil 2 [Source:MGI Symbol;Acc:MGI:1913489]
ENSMUSG00000028394	-0.422574	0.0468467	1.43476	0.835021	Pole3	protein_coding	polymerase (DNA directed), epsilon 3 (p17 subunit) [Source:MGI Symbol;Acc:MGI:1933378]
ENSMUSG00000036646	-0.264049	0.0470232	0.65437	0.124213	Man1b1	protein_coding	mannosidase, alpha, class 1B, member 1 [Source:MGI Symbol;Acc:MGI:2684954]
ENSMUSG00000026707	NA	0.0473636	0.435458	0	Nsun6	protein_coding	NOL1/NOP2/Sun domain family member 6 [Source:MGI Symbol;Acc:MGI:1921705]
ENSMUSG00000012848	-3.19515	0.0473636	7.14891	6.16533	Rps5	protein_coding	ribosomal protein S5 [Source:MGI Symbol;Acc:MGI:1097682]
ENSMUSG00000024471	-2.41133	0.0473636	5.16011	3.34193	Myot	protein_coding	myotilin [Source:MGI Symbol;Acc:MGI:1889800]
ENSMUSG00000012117	-1.14824	0.0473636	2.679	1.19538	Dhdds	protein_coding	dehydrodolichyl diphosphate synthase [Source:MGI Symbol;Acc:MGI:1914672]
ENSMUSG00000071317	-0.548556	0.0473636	2.81916	2.80073	Bves	protein_coding	blood vessel epicardial substance [Source:MGI Symbol;Acc:MGI:1346013]
ENSMUSG00000028647	-0.480955	0.0473636	1.69082	0.798384	Mycbp	protein_coding	MYC binding protein [Source:MGI Symbol;Acc:MGI:1891750]
ENSMUSG00000069565	-0.323866	0.0473636	1.95862	1.98358	Dazap1	protein_coding	DAZ associated protein 1 [Source:MGI Symbol;Acc:MGI:1917498]
ENSMUSG00000069255	-0.31155	0.0473636	1.41617	0.978386	Dusp22	protein_coding	dual specificity phosphatase 22 [Source:MGI Symbol;Acc:MGI:1915926]
ENSMUSG00000024767	-0.0554907	0.0473636	1.68273	1.98951	Otub1	protein_coding	OTU domain, ubiquitin aldehyde binding 1 [Source:MGI Symbol;Acc:MGI:2147616]
ENSMUSG00000022283	-0.839077	0.0479529	2.99145	2.14303	Pabpc1	protein_coding	poly(A) binding protein, cytoplasmic 1 [Source:MGI Symbol;Acc:MGI:1349722]
ENSMUSG00000025428	0.388885	0.0483111	12.5874	12.9904	Atp5a1	protein_coding	ATP synthase, H+ transporting, mitochondrial F1 complex, alpha subunit 1 [Source:MGI Symbol;Acc:MGI:88115]
ENSMUSG00000022893	-1.2508	0.0483111	2.18845	0.85362	Adamts1	protein_coding	a disintegrin-like and metallopeptidase (reprolysin type) with thrombospondin type 1 motif, 1 [Source:MGI Symbol;Acc:MGI:109249]
ENSMUSG00000014074	-0.226151	0.0483111	1.13704	0.363258	Rnf168	protein_coding	ring finger protein 168 [Source:MGI Symbol;Acc:MGI:1917488]
ENSMUSG00000027722	-0.187743	0.0483111	1.0238	0.659179	Spata5	protein_coding	spermatogenesis associated 5 [Source:MGI Symbol;Acc:MGI:1927170]
ENSMUSG00000029153	-0.151868	0.0483111	0.743974	0.104802	Ociad2	protein_coding	OCIA domain containing 2 [Source:MGI Symbol;Acc:MGI:1916377]
ENSMUSG00000093752	-1.61422	0.0486527	4.08146	2.66863	Gm20716	protein_coding	predicted gene 20716 [Source:MGI Symbol;Acc:MGI:5313163]
ENSMUSG00000034781	-0.515392	0.0488553	1.96398	1.16556	Gna11	protein_coding	guanine nucleotide binding protein, alpha 11 [Source:MGI Symbol;Acc:MGI:95766]

## Sheet: Supplementary table 2
Supplementary table 2 - Differentially expressed genes between Cluster 1 and Cluster 2 cardiomyocytes (FDR < 0.01)
ENSEMBL_geneID	log-fold-change	FDR	Expression_Cluster_1	Expression_Cluster_2	Gene_Symbol	Biotype	Description
ENSMUSG00000026749	-0.38034	9.06398e-23	1.50279	1.10728	Nek6	protein_coding	NIMA (never in mitosis gene a)-related expressed kinase 6 [Source:MGI Symbol;Acc:MGI:1891638]
ENSMUSG00000029165	-1.84685	4.01277e-21	3.38483	1.50426	Agbl5	protein_coding	ATP/GTP binding protein-like 5 [Source:MGI Symbol;Acc:MGI:2441745]
ENSMUSG00000111497	-1.53371	7.97157e-20	2.32683	0.763129	Raver1	protein_coding	ribonucleoprotein, PTB-binding 1 [Source:MGI Symbol;Acc:MGI:1919016]
ENSMUSG00000018293	-0.648747	1.88089e-19	2.27998	1.60891	Pfn1	protein_coding	profilin 1 [Source:MGI Symbol;Acc:MGI:97549]
ENSMUSG00000079677	-1.49342	1.02312e-18	2.33336	0.813765	Fdx1l	protein_coding	ferredoxin 1-like [Source:MGI Symbol;Acc:MGI:1915415]
ENSMUSG00000047888	-1.68593	4.51366e-18	2.47995	0.769685	Tnrc6b	protein_coding	trinucleotide repeat containing 6b [Source:MGI Symbol;Acc:MGI:2443730]
ENSMUSG00000039206	-1.48693	1.15822e-17	2.93211	1.41841	Daglb	protein_coding	diacylglycerol lipase, beta [Source:MGI Symbol;Acc:MGI:2442032]
ENSMUSG00000014776	-1.28259	3.09707e-17	2.69066	1.38424	Nol3	protein_coding	nucleolar protein 3 (apoptosis repressor with CARD domain) [Source:MGI Symbol;Acc:MGI:1925938]
ENSMUSG00000040842	-0.42037	3.3193e-17	1.82886	1.39273	Szrd1	protein_coding	SUZ RNA binding domain containing 1 [Source:MGI Symbol;Acc:MGI:1098672]
ENSMUSG00000111692	-1.471	4.14608e-17	2.3371	0.840679	AC163637.2	protein_coding
ENSMUSG00000042650	-1.09461	5.41654e-17	2.4544	1.33731	Alkbh5	protein_coding	alkB homolog 5, RNA demethylase [Source:MGI Symbol;Acc:MGI:2144489]
ENSMUSG00000034563	-2.06201	5.41654e-17	4.46777	2.36829	Ccpg1	protein_coding	cell cycle progression 1 [Source:MGI Symbol;Acc:MGI:1196419]
ENSMUSG00000034868	-0.819025	1.35054e-16	2.42862	1.59007	Myl12b	protein_coding	myosin, light chain 12B, regulatory [Source:MGI Symbol;Acc:MGI:107494]
ENSMUSG00000020079	-1.32499	1.58661e-16	1.9709	0.623999	Supv3l1	protein_coding	suppressor of var1, 3-like 1 (S. cerevisiae) [Source:MGI Symbol;Acc:MGI:2441711]
ENSMUSG00000096486	-0.388538	1.94325e-16	1.19146	0.792657	Gm5426	protein_coding	predicted pseudogene 5426 [Source:MGI Symbol;Acc:MGI:3646788]
ENSMUSG00000059820	-0.61203	1.94325e-16	2.50726	1.87561	AU019823	protein_coding	expressed sequence AU019823 [Source:MGI Symbol;Acc:MGI:2143205]
ENSMUSG00000003299	-0.87525	2.27167e-16	2.96944	2.06708	Mrpl4	protein_coding	mitochondrial ribosomal protein L4 [Source:MGI Symbol;Acc:MGI:2137210]
ENSMUSG00000026229	-1.38394	2.45341e-16	3.04836	1.63824	Psmd1	protein_coding	proteasome (prosome, macropain) 26S subunit, non-ATPase, 1 [Source:MGI Symbol;Acc:MGI:1917497]
ENSMUSG00000060098	-1.05316	3.33346e-16	2.32609	1.25142	Prmt7	protein_coding	protein arginine N-methyltransferase 7 [Source:MGI Symbol;Acc:MGI:2384879]
ENSMUSG00000011382	-0.609162	4.26406e-16	1.7007	1.07325	Dhdh	protein_coding	dihydrodiol dehydrogenase (dimeric) [Source:MGI Symbol;Acc:MGI:1919005]
ENSMUSG00000016018	-2.01905	4.26406e-16	3.3023	1.25736	Skiv2l2	protein_coding	superkiller viralicidic activity 2-like 2 (S. cerevisiae) [Source:MGI Symbol;Acc:MGI:1919448]
ENSMUSG00000026750	-0.222999	6.80074e-16	1.6593	1.42343	Psmb7	protein_coding	proteasome (prosome, macropain) subunit, beta type 7 [Source:MGI Symbol;Acc:MGI:107637]
ENSMUSG00000023050	-2.26852	6.80074e-16	4.91362	2.60363	Map3k12	protein_coding	mitogen-activated protein kinase kinase kinase 12 [Source:MGI Symbol;Acc:MGI:1346881]
ENSMUSG00000021759	-1.45731	7.64862e-16	2.81913	1.33925	Plpp1	protein_coding	phospholipid phosphatase 1 [Source:MGI Symbol;Acc:MGI:108412]
ENSMUSG00000032387	-1.39566	8.48341e-16	2.57898	1.15924	Rbpms2	protein_coding	RNA binding protein with multiple splicing 2 [Source:MGI Symbol;Acc:MGI:1919223]
ENSMUSG00000038286	-1.32171	8.53299e-16	2.16002	0.81695	Bphl	protein_coding	biphenyl hydrolase-like (serine hydrolase, breast epithelial mucin-associated antigen) [Source:MGI Symbol;Acc:MGI:1915271]
ENSMUSG00000045106	-0.223827	9.27648e-16	1.07276	0.838121	Ccdc73	protein_coding	coiled-coil domain containing 73 [Source:MGI Symbol;Acc:MGI:3606488]
ENSMUSG00000108596	-0.30077	9.27648e-16	0.817528	0.507433	Itgam	protein_coding	integrin alpha M [Source:MGI Symbol;Acc:MGI:96607]
ENSMUSG00000024687	-1.45833	9.27648e-16	2.50913	1.02844	Osbp	protein_coding	oxysterol binding protein [Source:MGI Symbol;Acc:MGI:97447]
ENSMUSG00000029397	-1.50363	9.27648e-16	2.53188	1.00188	Rchy1	protein_coding	ring finger and CHY zinc finger domain containing 1 [Source:MGI Symbol;Acc:MGI:1915348]
ENSMUSG00000030990	-1.53271	1.08835e-15	3.76615	2.20221	Pgap2	protein_coding	post-GPI attachment to proteins 2 [Source:MGI Symbol;Acc:MGI:2385286]
ENSMUSG00000039943	-1.14423	1.6541e-15	2.09585	0.928397	Plcb4	protein_coding	phospholipase C, beta 4 [Source:MGI Symbol;Acc:MGI:107464]
ENSMUSG00000020863	-1.88941	1.6541e-15	4.26781	2.34374	Luc7l3	protein_coding	LUC7-like 3 (S. cerevisiae) [Source:MGI Symbol;Acc:MGI:1914934]
ENSMUSG00000030629	-2.74769	1.72414e-15	5.38954	2.60186	Zfand6	protein_coding	zinc finger, AN1-type domain 6 [Source:MGI Symbol;Acc:MGI:1929510]
ENSMUSG00000065952	-1.79738	2.11139e-15	4.16594	2.3376	C330021F23Rik	protein_coding	RIKEN cDNA C330021F23 gene [Source:MGI Symbol;Acc:MGI:3612471]
ENSMUSG00000014592	-2.70466	2.11139e-15	5.98495	3.22916	Camta1	protein_coding	calmodulin binding transcription activator 1 [Source:MGI Symbol;Acc:MGI:2140230]
ENSMUSG00000002981	-0.835273	2.13964e-15	1.3865	0.537144	Clptm1	protein_coding	cleft lip and palate associated transmembrane protein 1 [Source:MGI Symbol;Acc:MGI:1927155]
ENSMUSG00000028757	-0.88268	2.13964e-15	1.62204	0.723428	Ddost	protein_coding	dolichyl-di-phosphooligosaccharide-protein glycotransferase [Source:MGI Symbol;Acc:MGI:1194508]
ENSMUSG00000052934	-1.56685	2.21746e-15	3.29935	1.70602	Fbxo31	protein_coding	F-box protein 31 [Source:MGI Symbol;Acc:MGI:1354708]
ENSMUSG00000031586	-2.01777	2.23723e-15	4.79352	2.73284	Rbpms	protein_coding	RNA binding protein gene with multiple splicing [Source:MGI Symbol;Acc:MGI:1334446]
ENSMUSG00000089865	-1.36019	2.31995e-15	2.9672	1.58299	Gm44503	protein_coding	predicted readthrough transcript (NMD candidate), 44503 [Source:MGI Symbol;Acc:MGI:5141975]
ENSMUSG00000012535	-1.63077	2.31995e-15	2.75502	1.0956	Tnpo3	protein_coding	transportin 3 [Source:MGI Symbol;Acc:MGI:1196412]
ENSMUSG00000027893	-0.9272	2.35422e-15	3.2366	2.28179	Ahcyl1	protein_coding	S-adenosylhomocysteine hydrolase-like 1 [Source:MGI Symbol;Acc:MGI:2385184]
ENSMUSG00000027742	-1.70579	2.74143e-15	3.06937	1.34071	Cog6	protein_coding	component of oligomeric golgi complex 6 [Source:MGI Symbol;Acc:MGI:1914792]
ENSMUSG00000026925	-1.86871	2.98701e-15	3.21067	1.31776	Inpp5e	protein_coding	inositol polyphosphate-5-phosphatase E [Source:MGI Symbol;Acc:MGI:1927753]
ENSMUSG00000033918	-1.36423	3.01449e-15	2.96657	1.57808	Parl	protein_coding	presenilin associated, rhomboid-like [Source:MGI Symbol;Acc:MGI:1277152]
ENSMUSG00000018040	-1.20474	3.03251e-15	2.67323	1.44599	Rrp7a	protein_coding	ribosomal RNA processing 7 homolog A (S. cerevisiae) [Source:MGI Symbol;Acc:MGI:1922028]
ENSMUSG00000066149	-1.99122	3.59093e-15	2.7072	0.685881	Cdc26	protein_coding	cell division cycle 26 [Source:MGI Symbol;Acc:MGI:1913690]
ENSMUSG00000038204	-0.964976	3.63685e-15	2.28315	1.29862	Asb10	protein_coding	ankyrin repeat and SOCS box-containing 10 [Source:MGI Symbol;Acc:MGI:2152836]
ENSMUSG00000057469	-1.15996	4.12342e-15	2.85658	1.67334	E2f6	protein_coding	E2F transcription factor 6 [Source:MGI Symbol;Acc:MGI:1354159]
ENSMUSG00000026276	-1.18982	4.12342e-15	2.81541	1.60205	Sept2	protein_coding	septin 2 [Source:MGI Symbol;Acc:MGI:97298]
ENSMUSG00000073600	-2.05742	4.17799e-15	3.61947	1.53741	Prob1	protein_coding	proline rich basic protein 1 [Source:MGI Symbol;Acc:MGI:2686460]
ENSMUSG00000007564	-1.0034	4.48097e-15	2.19209	1.17053	Ppp2r1a	protein_coding	protein phosphatase 2, regulatory subunit A, alpha [Source:MGI Symbol;Acc:MGI:1926334]
ENSMUSG00000066406	-1.92254	4.62544e-15	3.53375	1.58364	Akap13	protein_coding	A kinase (PRKA) anchor protein 13 [Source:MGI Symbol;Acc:MGI:2676556]
ENSMUSG00000073471	-1.43329	4.70282e-15	3.45785	1.99713	Rsph3a	protein_coding	radial spoke 3A homolog (Chlamydomonas) [Source:MGI Symbol;Acc:MGI:1914082]
ENSMUSG00000023495	-0.884372	4.85451e-15	2.05248	1.14997	Pcbp4	protein_coding	poly(rC) binding protein 4 [Source:MGI Symbol;Acc:MGI:1890471]
ENSMUSG00000019055	-0.824771	5.11027e-15	1.79546	0.952972	Plod1	protein_coding	procollagen-lysine, 2-oxoglutarate 5-dioxygenase 1 [Source:MGI Symbol;Acc:MGI:99907]
ENSMUSG00000013663	-1.44597	5.60778e-15	3.75543	2.27845	Pten	protein_coding	phosphatase and tensin homolog [Source:MGI Symbol;Acc:MGI:109583]
ENSMUSG00000074652	-0.626106	5.84255e-15	1.07403	0.434816	Myh7b	protein_coding	myosin, heavy chain 7B, cardiac muscle, beta [Source:MGI Symbol;Acc:MGI:3710243]
ENSMUSG00000022257	-1.60012	5.84255e-15	3.04261	1.41969	Laptm4b	protein_coding	lysosomal-associated protein transmembrane 4B [Source:MGI Symbol;Acc:MGI:1890494]
ENSMUSG00000019849	-0.830662	5.93659e-15	1.93292	1.08445	Prep	protein_coding	prolyl endopeptidase [Source:MGI Symbol;Acc:MGI:1270863]
ENSMUSG00000028977	-1.09099	5.93659e-15	2.47003	1.35782	Casz1	protein_coding	castor zinc finger 1 [Source:MGI Symbol;Acc:MGI:1196251]
ENSMUSG00000032540	-2.15269	6.08587e-15	3.29643	1.11495	Abhd5	protein_coding	abhydrolase domain containing 5 [Source:MGI Symbol;Acc:MGI:1914719]
ENSMUSG00000033377	-1.14863	6.10802e-15	2.64396	1.47248	Palmd	protein_coding	palmdelphin [Source:MGI Symbol;Acc:MGI:2148896]
ENSMUSG00000059923	-1.76092	6.11452e-15	4.36993	2.57432	Grb2	protein_coding	growth factor receptor bound protein 2 [Source:MGI Symbol;Acc:MGI:95805]
ENSMUSG00000107283	-1.78312	6.56471e-15	4.09567	2.28019	Mpv17	protein_coding	MpV17 mitochondrial inner membrane protein [Source:MGI Symbol;Acc:MGI:97138]
ENSMUSG00000021076	-1.25276	7.21623e-15	2.5439	1.27027	Actr10	protein_coding	ARP10 actin-related protein 10 [Source:MGI Symbol;Acc:MGI:1891654]
ENSMUSG00000003435	-2.04761	7.51895e-15	3.69609	1.61949	Supt5	protein_coding	suppressor of Ty 5 [Source:MGI Symbol;Acc:MGI:1202400]
ENSMUSG00000001552	-0.653074	7.92267e-15	1.54431	0.877704	Jup	protein_coding	junction plakoglobin [Source:MGI Symbol;Acc:MGI:96650]
ENSMUSG00000053929	-1.32629	8.66534e-15	3.38559	2.03154	Cyhr1	protein_coding	cysteine and histidine rich 1 [Source:MGI Symbol;Acc:MGI:1859320]
ENSMUSG00000053113	-0.972358	9.92388e-15	1.8429	0.853902	Socs3	protein_coding	suppressor of cytokine signaling 3 [Source:MGI Symbol;Acc:MGI:1201791]
ENSMUSG00000052310	-0.82601	1.04975e-14	2.26656	1.42193	Slc39a1	protein_coding	solute carrier family 39 (zinc transporter), member 1 [Source:MGI Symbol;Acc:MGI:1353474]
ENSMUSG00000026154	-1.63604	1.07769e-14	4.27974	2.60867	Sdhaf4	protein_coding	succinate dehydrogenase complex assembly factor 4 [Source:MGI Symbol;Acc:MGI:1915252]
ENSMUSG00000049106	-1.21441	1.09927e-14	2.02499	0.791615	Dcaf5	protein_coding	DDB1 and CUL4 associated factor 5 [Source:MGI Symbol;Acc:MGI:2444785]
ENSMUSG00000035640	-1.56923	1.14045e-14	3.04961	1.45477	Cbarp	protein_coding	calcium channel, voltage-dependent, beta subunit associated regulatory protein [Source:MGI Symbol;Acc:MGI:1354170]
ENSMUSG00000039461	-1.35945	1.17191e-14	2.71332	1.333	Tcta	protein_coding	T cell leukemia translocation altered gene [Source:MGI Symbol;Acc:MGI:1918829]
ENSMUSG00000000826	-1.9814	1.17191e-14	3.53051	1.52452	Dnajc5	protein_coding	DnaJ heat shock protein family (Hsp40) member C5 [Source:MGI Symbol;Acc:MGI:892995]
ENSMUSG00000034252	-2.2308	1.24649e-14	4.442	2.17788	Senp6	protein_coding	SUMO/sentrin specific peptidase 6 [Source:MGI Symbol;Acc:MGI:1922075]
ENSMUSG00000037443	-1.21308	1.26077e-14	2.24231	1.00472	Cep85	protein_coding	centrosomal protein 85 [Source:MGI Symbol;Acc:MGI:1917262]
ENSMUSG00000062753	-0.644371	1.3157e-14	1.54196	0.882735	AI413582	protein_coding	expressed sequence AI413582 [Source:MGI Symbol;Acc:MGI:2146839]
ENSMUSG00000031592	-1.65394	1.3157e-14	3.89747	2.21291	Pcm1	protein_coding	pericentriolar material 1 [Source:MGI Symbol;Acc:MGI:1277958]
ENSMUSG00000047514	-1.69821	1.3157e-14	3.74741	2.01948	Tspyl1	protein_coding	testis-specific protein, Y-encoded-like 1 [Source:MGI Symbol;Acc:MGI:1298395]
ENSMUSG00000063870	-1.74561	1.38128e-14	5.05528	3.26705	Chd4	protein_coding	chromodomain helicase DNA binding protein 4 [Source:MGI Symbol;Acc:MGI:1344380]
ENSMUSG00000002064	-1.55701	1.50897e-14	2.56287	0.983642	Sdf2	protein_coding	stromal cell derived factor 2 [Source:MGI Symbol;Acc:MGI:108019]
ENSMUSG00000056228	-1.13126	1.56441e-14	2.49474	1.34318	Cars2	protein_coding	cysteinyl-tRNA synthetase 2 (mitochondrial)(putative) [Source:MGI Symbol;Acc:MGI:1919191]
ENSMUSG00000024231	-1.91937	1.56746e-14	2.8983	0.956249	Cul2	protein_coding	cullin 2 [Source:MGI Symbol;Acc:MGI:1918995]
ENSMUSG00000001158	-1.46897	1.64437e-14	4.29733	2.79089	Snrnp27	protein_coding	small nuclear ribonucleoprotein 27 (U4/U6.U5) [Source:MGI Symbol;Acc:MGI:1913868]
ENSMUSG00000023806	-1.41441	1.65826e-14	3.45129	2.0102	Rsph3b	protein_coding	radial spoke 3B homolog (Chlamydomonas) [Source:MGI Symbol;Acc:MGI:3630308]
ENSMUSG00000078931	-1.17951	1.66114e-14	2.02242	0.825298	Pdf	protein_coding	peptide deformylase (mitochondrial) [Source:MGI Symbol;Acc:MGI:1915273]
ENSMUSG00000016534	-2.11142	1.66114e-14	3.49009	1.35614	Lamp2	protein_coding	lysosomal-associated membrane protein 2 [Source:MGI Symbol;Acc:MGI:96748]
ENSMUSG00000015971	-1.21374	1.70842e-14	2.00769	0.768253	Actr8	protein_coding	ARP8 actin-related protein 8 [Source:MGI Symbol;Acc:MGI:1860775]
ENSMUSG00000030852	-2.98388	1.7507e-14	8.27861	5.21922	Tacc2	protein_coding	transforming, acidic coiled-coil containing protein 2 [Source:MGI Symbol;Acc:MGI:1928899]
ENSMUSG00000002957	-1.13222	1.79522e-14	2.34086	1.18993	Ap2a2	protein_coding	adaptor-related protein complex 2, alpha 2 subunit [Source:MGI Symbol;Acc:MGI:101920]
ENSMUSG00000023977	-1.72838	1.79522e-14	3.72841	1.97161	Ubr2	protein_coding	ubiquitin protein ligase E3 component n-recognin 2 [Source:MGI Symbol;Acc:MGI:1861099]
ENSMUSG00000050732	-2.25623	1.84392e-14	4.20827	1.92256	Vamp8	protein_coding	vesicle-associated membrane protein 8 [Source:MGI Symbol;Acc:MGI:1336882]
ENSMUSG00000078517	-1.27135	1.86716e-14	2.28033	0.981085	Emc1	protein_coding	ER membrane protein complex subunit 1 [Source:MGI Symbol;Acc:MGI:2443696]
ENSMUSG00000036241	-1.60211	1.97474e-14	4.51719	2.86807	Ube2r2	protein_coding	ubiquitin-conjugating enzyme E2R 2 [Source:MGI Symbol;Acc:MGI:1914865]
ENSMUSG00000017615	-1.921	1.97474e-14	2.94031	0.996654	Tnfaip1	protein_coding	tumor necrosis factor, alpha-induced protein 1 (endothelial) [Source:MGI Symbol;Acc:MGI:104961]
ENSMUSG00000006412	-0.479724	2.19883e-14	2.11258	1.61498	Pfdn2	protein_coding	prefoldin 2 [Source:MGI Symbol;Acc:MGI:1276111]
ENSMUSG00000005813	-1.0816	2.21893e-14	2.07236	0.970709	Metap1	protein_coding	methionyl aminopeptidase 1 [Source:MGI Symbol;Acc:MGI:1922874]
ENSMUSG00000021390	-1.92369	2.22193e-14	3.43408	1.48709	Ogn	protein_coding	osteoglycin [Source:MGI Symbol;Acc:MGI:109278]
ENSMUSG00000039523	-0.899948	2.55562e-14	1.86885	0.949185	Cep104	protein_coding	centrosomal protein 104 [Source:MGI Symbol;Acc:MGI:2687282]
ENSMUSG00000029864	-1.37391	2.75893e-14	3.9106	2.49885	Gstk1	protein_coding	glutathione S-transferase kappa 1 [Source:MGI Symbol;Acc:MGI:1923513]
ENSMUSG00000025868	-1.41075	2.7751e-14	3.06913	1.63497	Higd2a	protein_coding	HIG1 domain family, member 2A [Source:MGI Symbol;Acc:MGI:1914294]
ENSMUSG00000032112	-1.46139	2.7751e-14	2.55161	1.06739	Trappc4	protein_coding	trafficking protein particle complex 4 [Source:MGI Symbol;Acc:MGI:1926211]
ENSMUSG00000020593	-2.80481	2.7751e-14	6.52593	3.671	Lpin1	protein_coding	lipin 1 [Source:MGI Symbol;Acc:MGI:1891340]
ENSMUSG00000078240	-0.165466	2.95815e-14	0.831039	0.656852	Gm3550	protein_coding	predicted gene 3550 [Source:MGI Symbol;Acc:MGI:3781727]
ENSMUSG00000024944	-0.956034	2.95815e-14	2.76522	1.78718	Arl2	protein_coding	ADP-ribosylation factor-like 2 [Source:MGI Symbol;Acc:MGI:1928393]
ENSMUSG00000006024	-1.31077	2.99329e-14	3.04162	1.70746	Napa	protein_coding	N-ethylmaleimide sensitive fusion protein attachment protein alpha [Source:MGI Symbol;Acc:MGI:104563]
ENSMUSG00000029591	-1.64109	2.99925e-14	2.48603	0.820654	Ung	protein_coding	uracil DNA glycosylase [Source:MGI Symbol;Acc:MGI:109352]
ENSMUSG00000030319	-1.97216	3.21457e-14	3.90575	1.90557	Cand2	protein_coding	cullin-associated and neddylation-dissociated 2 (putative) [Source:MGI Symbol;Acc:MGI:1914338]
ENSMUSG00000007850	-1.48776	3.44219e-14	3.55028	2.03404	Hnrnph1	protein_coding	heterogeneous nuclear ribonucleoprotein H1 [Source:MGI Symbol;Acc:MGI:1891925]
ENSMUSG00000021555	-1.70883	3.44219e-14	3.35121	1.61692	Naa35	protein_coding	N(alpha)-acetyltransferase 35, NatC auxiliary subunit [Source:MGI Symbol;Acc:MGI:1925939]
ENSMUSG00000060038	-0.747705	3.50552e-14	1.93366	1.16877	Dhps	protein_coding	deoxyhypusine synthase [Source:MGI Symbol;Acc:MGI:2683592]
ENSMUSG00000039660	-1.12893	3.58263e-14	3.39955	2.24545	Spout1	protein_coding	SPOUT domain containing methyltransferase 1 [Source:MGI Symbol;Acc:MGI:106544]
ENSMUSG00000067455	-1.20406	3.58263e-14	1.68987	0.45836	Hist1h4j	protein_coding	histone cluster 1, H4j [Source:MGI Symbol;Acc:MGI:2448436]
ENSMUSG00000037475	-1.28062	3.58263e-14	2.33435	1.03354	Thoc2	protein_coding	THO complex 2 [Source:MGI Symbol;Acc:MGI:2442413]
ENSMUSG00000029781	-1.42281	3.68956e-14	3.18916	1.74194	Fkbp9	protein_coding	FK506 binding protein 9 [Source:MGI Symbol;Acc:MGI:1350921]
ENSMUSG00000067369	-1.09052	3.94174e-14	2.17062	1.05936	Trmt2b	protein_coding	TRM2 tRNA methyltransferase 2B [Source:MGI Symbol;Acc:MGI:2442530]
ENSMUSG00000020220	-1.48456	4.03491e-14	3.62516	2.11287	Vps13d	protein_coding	vacuolar protein sorting 13D [Source:MGI Symbol;Acc:MGI:2448530]
ENSMUSG00000070436	-1.83709	4.11945e-14	3.92577	2.05839	Serpinh1	protein_coding	serine (or cysteine) peptidase inhibitor, clade H, member 1 [Source:MGI Symbol;Acc:MGI:88283]
ENSMUSG00000030587	-0.771343	4.42496e-14	2.12479	1.33602	2200002D01Rik	protein_coding	RIKEN cDNA 2200002D01 gene [Source:MGI Symbol;Acc:MGI:1919525]
ENSMUSG00000035337	-0.834858	4.42496e-14	2.06803	1.21634	Uchl4	protein_coding	ubiquitin carboxyl-terminal esterase L4 [Source:MGI Symbol;Acc:MGI:1890440]
ENSMUSG00000036104	-1.37765	4.42496e-14	2.59909	1.20153	Rab3gap1	protein_coding	RAB3 GTPase activating protein subunit 1 [Source:MGI Symbol;Acc:MGI:2445001]
ENSMUSG00000039670	-0.617827	4.65501e-14	2.74686	2.10794	Oxld1	protein_coding	oxidoreductase like domain containing 1 [Source:MGI Symbol;Acc:MGI:1913681]
ENSMUSG00000062742	-0.46157	5.01122e-14	1.83609	1.35963	Gm5239	protein_coding	predicted pseudogene 5239 [Source:MGI Symbol;Acc:MGI:3648788]
ENSMUSG00000037960	-1.2497	5.13551e-14	2.33079	1.06235	Card19	protein_coding	caspase recruitment domain family, member 19 [Source:MGI Symbol;Acc:MGI:1915730]
ENSMUSG00000025208	-1.15044	5.53346e-14	3.25727	2.08214	Mrpl43	protein_coding	mitochondrial ribosomal protein L43 [Source:MGI Symbol;Acc:MGI:2137229]
ENSMUSG00000073422	-1.21776	5.57801e-14	3.33795	2.09256	H2-Ke6	protein_coding	H2-K region expressed gene 6 [Source:MGI Symbol;Acc:MGI:95911]
ENSMUSG00000021951	-1.33649	5.93687e-14	2.43301	1.07679	Eef1akmt1	protein_coding	EEF1A alpha lysine methyltransferase 1 [Source:MGI Symbol;Acc:MGI:1915293]
ENSMUSG00000030846	-2.25701	6.48746e-14	3.0531	0.771734	Tial1	protein_coding	Tia1 cytotoxic granule-associated RNA binding protein-like 1 [Source:MGI Symbol;Acc:MGI:107913]
ENSMUSG00000032458	-1.71434	6.6919e-14	4.01852	2.27392	Copb2	protein_coding	coatomer protein complex, subunit beta 2 (beta prime) [Source:MGI Symbol;Acc:MGI:1354962]
ENSMUSG00000061306	-0.723002	6.79092e-14	1.32365	0.581525	Slc38a10	protein_coding	solute carrier family 38, member 10 [Source:MGI Symbol;Acc:MGI:1919305]
ENSMUSG00000078813	-1.11493	6.79092e-14	2.23564	1.10118	Leng1	protein_coding	leukocyte receptor cluster (LRC) member 1 [Source:MGI Symbol;Acc:MGI:1917007]
ENSMUSG00000022889	-1.34968	6.79304e-14	2.89564	1.52456	Mrpl39	protein_coding	mitochondrial ribosomal protein L39 [Source:MGI Symbol;Acc:MGI:1351620]
ENSMUSG00000003559	-1.58259	7.24314e-14	2.83927	1.23393	As3mt	protein_coding	arsenic (+3 oxidation state) methyltransferase [Source:MGI Symbol;Acc:MGI:1929882]
ENSMUSG00000025175	-0.725034	7.69209e-14	1.43373	0.688656	Fn3k	protein_coding	fructosamine 3 kinase [Source:MGI Symbol;Acc:MGI:1926834]
ENSMUSG00000033813	-1.50307	7.69209e-14	2.7241	1.19562	Tcea1	protein_coding	transcription elongation factor A (SII) 1 [Source:MGI Symbol;Acc:MGI:1196624]
ENSMUSG00000026096	-0.908499	7.83288e-14	2.68554	1.75588	Osgepl1	protein_coding	O-sialoglycoprotein endopeptidase-like 1 [Source:MGI Symbol;Acc:MGI:1919335]
ENSMUSG00000040236	-1.58657	8.03684e-14	2.80607	1.19727	Trappc5	protein_coding	trafficking protein particle complex 5 [Source:MGI Symbol;Acc:MGI:1913932]
ENSMUSG00000096887	0.233835	8.0489e-14	1.41873	1.6435	Gm20594	protein_coding	predicted gene, 20594 [Source:MGI Symbol;Acc:MGI:5295700]
ENSMUSG00000033083	-1.55958	8.46711e-14	3.19097	1.60797	Tbc1d4	protein_coding	TBC1 domain family, member 4 [Source:MGI Symbol;Acc:MGI:2429660]
ENSMUSG00000015750	-1.39471	8.70728e-14	3.95674	2.52864	Aph1a	protein_coding	aph1 homolog A, gamma secretase subunit [Source:MGI Symbol;Acc:MGI:2385110]
ENSMUSG00000025757	-1.56698	8.78461e-14	3.56432	1.97082	Hspa4l	protein_coding	heat shock protein 4 like [Source:MGI Symbol;Acc:MGI:107422]
ENSMUSG00000068264	-1.78535	8.88461e-14	2.21806	0.408422	Ap5s1	protein_coding	adaptor-related protein 5 complex, sigma 1 subunit [Source:MGI Symbol;Acc:MGI:1916846]
ENSMUSG00000040167	-1.11888	8.98482e-14	1.87707	0.7384	Ikzf5	protein_coding	IKAROS family zinc finger 5 [Source:MGI Symbol;Acc:MGI:1914393]
ENSMUSG00000027665	-1.59262	9.32734e-14	3.58691	1.96571	Pik3ca	protein_coding	phosphatidylinositol-4,5-bisphosphate 3-kinase catalytic subunit alpha [Source:MGI Symbol;Acc:MGI:1206581]
ENSMUSG00000044709	-1.19908	9.73881e-14	2.8879	1.66525	Gemin7	protein_coding	gem nuclear organelle associated protein 7 [Source:MGI Symbol;Acc:MGI:1916981]
ENSMUSG00000021796	-1.08346	9.97683e-14	2.20037	1.09788	Bmpr1a	protein_coding	bone morphogenetic protein receptor, type 1A [Source:MGI Symbol;Acc:MGI:1338938]
ENSMUSG00000028251	-0.867274	1.01984e-13	2.04988	1.16465	Tstd3	protein_coding	thiosulfate sulfurtransferase (rhodanese)-like domain containing 3 [Source:MGI Symbol;Acc:MGI:1924282]
ENSMUSG00000031311	-1.33981	1.01984e-13	2.48379	1.12386	Nono	protein_coding	non-POU-domain-containing, octamer binding protein [Source:MGI Symbol;Acc:MGI:1855692]
ENSMUSG00000006676	-1.73373	1.01984e-13	3.224	1.46504	Usp19	protein_coding	ubiquitin specific peptidase 19 [Source:MGI Symbol;Acc:MGI:1918722]
ENSMUSG00000066839	-1.78286	1.01984e-13	4.76346	2.94377	Ecsit	protein_coding	ECSIT signalling integrator [Source:MGI Symbol;Acc:MGI:1349469]
ENSMUSG00000012117	-1.47386	1.02556e-13	2.84292	1.34599	Dhdds	protein_coding	dehydrodolichyl diphosphate synthase [Source:MGI Symbol;Acc:MGI:1914672]
ENSMUSG00000020277	-0.605368	1.05269e-13	1.8309	1.21092	Pfkl	protein_coding	phosphofructokinase, liver, B-type [Source:MGI Symbol;Acc:MGI:97547]
ENSMUSG00000028140	-1.4702	1.05269e-13	2.34286	0.853904	Mrpl9	protein_coding	mitochondrial ribosomal protein L9 [Source:MGI Symbol;Acc:MGI:2137211]
ENSMUSG00000032786	-2.21887	1.05269e-13	5.09759	2.83833	Alas1	protein_coding	aminolevulinic acid synthase 1 [Source:MGI Symbol;Acc:MGI:87989]
ENSMUSG00000014873	-0.935435	1.09426e-13	2.47905	1.52485	Surf2	protein_coding	surfeit gene 2 [Source:MGI Symbol;Acc:MGI:98444]
ENSMUSG00000093752	-1.33726	1.09426e-13	3.8852	2.51964	Gm20716	protein_coding	predicted gene 20716 [Source:MGI Symbol;Acc:MGI:5313163]
ENSMUSG00000045377	-0.79088	1.09438e-13	2.12282	1.3161	Tmem88	protein_coding	transmembrane protein 88 [Source:MGI Symbol;Acc:MGI:1914270]
ENSMUSG00000057130	-1.4787	1.10145e-13	3.90379	2.39398	Txnl4a	protein_coding	thioredoxin-like 4A [Source:MGI Symbol;Acc:MGI:1351613]
ENSMUSG00000061436	-1.28138	1.14315e-13	2.30581	1.00281	Hipk2	protein_coding	homeodomain interacting protein kinase 2 [Source:MGI Symbol;Acc:MGI:1314872]
ENSMUSG00000029338	-1.62878	1.17433e-13	2.8642	1.21607	Antxr2	protein_coding	anthrax toxin receptor 2 [Source:MGI Symbol;Acc:MGI:1919164]
ENSMUSG00000038181	-1.00956	1.21313e-13	2.4858	1.45698	Chpf2	protein_coding	chondroitin polymerizing factor 2 [Source:MGI Symbol;Acc:MGI:1917522]
ENSMUSG00000036499	-0.924716	1.26544e-13	2.5914	1.64632	Eea1	protein_coding	early endosome antigen 1 [Source:MGI Symbol;Acc:MGI:2442192]
ENSMUSG00000042605	-1.15613	1.27298e-13	2.84782	1.67014	Atxn2	protein_coding	ataxin 2 [Source:MGI Symbol;Acc:MGI:1277223]
ENSMUSG00000026078	-1.14917	1.30952e-13	3.17595	2.00285	Pdcl3	protein_coding	phosducin-like 3 [Source:MGI Symbol;Acc:MGI:1916083]
ENSMUSG00000000787	-2.01876	1.30952e-13	4.54546	2.49088	Ddx3x	protein_coding	DEAD/H (Asp-Glu-Ala-Asp/His) box polypeptide 3, X-linked [Source:MGI Symbol;Acc:MGI:103064]
ENSMUSG00000031820	-0.928428	1.37082e-13	2.6728	1.72378	Babam1	protein_coding	BRISC and BRCA1 A complex member 1 [Source:MGI Symbol;Acc:MGI:1915501]
ENSMUSG00000030029	-0.981174	1.43066e-13	1.29817	0.289868	Lrig1	protein_coding	leucine-rich repeats and immunoglobulin-like domains 1 [Source:MGI Symbol;Acc:MGI:107935]
ENSMUSG00000033707	-1.03359	1.44166e-13	2.77673	1.722	Lrrc24	protein_coding	leucine rich repeat containing 24 [Source:MGI Symbol;Acc:MGI:3605040]
ENSMUSG00000042032	-1.57501	1.46276e-13	4.72224	3.10471	Mat2b	protein_coding	methionine adenosyltransferase II, beta [Source:MGI Symbol;Acc:MGI:1913667]
ENSMUSG00000029319	-1.49564	1.5688e-13	4.19254	2.66105	Coq2	protein_coding	coenzyme Q2 4-hydroxybenzoate polyprenyltransferase [Source:MGI Symbol;Acc:MGI:1919133]
ENSMUSG00000002846	-0.697408	1.63905e-13	1.42571	0.713413	Timmdc1	protein_coding	translocase of inner mitochondrial membrane domain containing 1 [Source:MGI Symbol;Acc:MGI:1922139]
ENSMUSG00000032737	-0.969721	1.64265e-13	2.61582	1.6254	Inppl1	protein_coding	inositol polyphosphate phosphatase-like 1 [Source:MGI Symbol;Acc:MGI:1333787]
ENSMUSG00000031967	-0.546532	1.65089e-13	2.66654	2.09986	Afg3l1	protein_coding	AFG3-like AAA ATPase 1 [Source:MGI Symbol;Acc:MGI:1928277]
ENSMUSG00000057236	-1.27083	1.66709e-13	2.44704	1.15569	Rbbp4	protein_coding	retinoblastoma binding protein 4, chromatin remodeling factor [Source:MGI Symbol;Acc:MGI:1194912]
ENSMUSG00000067924	-0.798334	1.68222e-13	1.92666	1.11119	Rtl8b	protein_coding	retrotransposon Gag like 8B [Source:MGI Symbol;Acc:MGI:3576504]
ENSMUSG00000000561	-0.40174	1.69486e-13	2.43151	2.01137	Wdr77	protein_coding	WD repeat domain 77 [Source:MGI Symbol;Acc:MGI:1917715]
ENSMUSG00000091742	-0.611953	1.74639e-13	2.26024	1.63162	Gm5093	protein_coding	predicted gene 5093 [Source:MGI Symbol;Acc:MGI:3644404]
ENSMUSG00000040407	-1.78832	1.75198e-13	3.80226	1.98671	Akap9	protein_coding	A kinase (PRKA) anchor protein (yotiao) 9 [Source:MGI Symbol;Acc:MGI:2178217]
ENSMUSG00000038132	-1.92531	1.81687e-13	4.26721	2.31001	Rbm24	protein_coding	RNA binding motif protein 24 [Source:MGI Symbol;Acc:MGI:3610364]
ENSMUSG00000003865	-1.11077	1.85413e-13	2.08723	0.960252	Gys1	protein_coding	glycogen synthase 1, muscle [Source:MGI Symbol;Acc:MGI:101805]
ENSMUSG00000019920	-1.426	1.86251e-13	3.81283	2.35826	Lims1	protein_coding	LIM and senescent cell antigen-like domains 1 [Source:MGI Symbol;Acc:MGI:1195263]
ENSMUSG00000071317	-1.13329	1.88164e-13	2.75626	1.60234	Bves	protein_coding	blood vessel epicardial substance [Source:MGI Symbol;Acc:MGI:1346013]
ENSMUSG00000022812	-1.52439	1.90415e-13	3.23473	1.6872	Gsk3b	protein_coding	glycogen synthase kinase 3 beta [Source:MGI Symbol;Acc:MGI:1861437]
ENSMUSG00000031683	-2.69091	1.90415e-13	5.22724	2.50084	Lsm6	protein_coding	LSM6 homolog, U6 small nuclear RNA and mRNA degradation associated [Source:MGI Symbol;Acc:MGI:1925901]
ENSMUSG00000040731	-1.73926	1.94261e-13	4.56322	2.78582	Eif4h	protein_coding	eukaryotic translation initiation factor 4H [Source:MGI Symbol;Acc:MGI:1341822]
ENSMUSG00000048920	-0.43481	1.96997e-13	1.4048	0.955533	Fkrp	protein_coding	fukutin related protein [Source:MGI Symbol;Acc:MGI:2447586]
ENSMUSG00000020198	-0.937487	1.99176e-13	2.15057	1.19552	Ap3d1	protein_coding	adaptor-related protein complex 3, delta 1 subunit [Source:MGI Symbol;Acc:MGI:107734]
ENSMUSG00000045193	-1.06289	1.99755e-13	2.59928	1.51705	Cirbp	protein_coding	cold inducible RNA binding protein [Source:MGI Symbol;Acc:MGI:893588]
ENSMUSG00000060093	-1.22269	1.99755e-13	1.75246	0.505483	Hist1h4a	protein_coding	histone cluster 1, H4a [Source:MGI Symbol;Acc:MGI:2448419]
ENSMUSG00000029426	-1.82203	1.99755e-13	3.87104	2.02122	Scarb2	protein_coding	scavenger receptor class B, member 2 [Source:MGI Symbol;Acc:MGI:1196458]
ENSMUSG00000051154	-2.20665	1.99755e-13	5.12571	2.8791	Commd3	protein_coding	COMM domain containing 3 [Source:MGI Symbol;Acc:MGI:88218]
ENSMUSG00000031438	-2.33034	1.99755e-13	3.94653	1.59052	Rnf128	protein_coding	ring finger protein 128 [Source:MGI Symbol;Acc:MGI:1914139]
ENSMUSG00000052712	-2.40331	1.99755e-13	6.50669	4.03698	BC004004	protein_coding	cDNA sequence BC004004 [Source:MGI Symbol;Acc:MGI:2136782]
ENSMUSG00000007815	-1.66286	2.02829e-13	3.86372	2.17275	Rhoa	protein_coding	ras homolog family member A [Source:MGI Symbol;Acc:MGI:1096342]
ENSMUSG00000038803	-1.71891	2.0522e-13	3.60884	1.86425	Ost4	protein_coding	oligosaccharyltransferase complex subunit 4 (non-catalytic) [Source:MGI Symbol;Acc:MGI:1914945]
ENSMUSG00000018160	-0.851113	2.13992e-13	2.04785	1.17558	Med1	protein_coding	mediator complex subunit 1 [Source:MGI Symbol;Acc:MGI:1100846]
ENSMUSG00000091264	-1.26491	2.18199e-13	2.3112	1.02825	Smim13	protein_coding	small integral membrane protein 13 [Source:MGI Symbol;Acc:MGI:2652854]
ENSMUSG00000034801	-1.09725	2.19539e-13	2.05718	0.94021	Sos2	protein_coding	son of sevenless homolog 2 (Drosophila) [Source:MGI Symbol;Acc:MGI:98355]
ENSMUSG00000025234	-1.17951	2.19539e-13	2.28133	1.08464	Arih1	protein_coding	ariadne RBR E3 ubiquitin protein ligase 1 [Source:MGI Symbol;Acc:MGI:1344363]
ENSMUSG00000034781	-1.2376	2.2141e-13	2.14367	0.886979	Gna11	protein_coding	guanine nucleotide binding protein, alpha 11 [Source:MGI Symbol;Acc:MGI:95766]
ENSMUSG00000032497	-2.54214	2.22286e-13	5.21559	2.63683	Lrrfip2	protein_coding	leucine rich repeat (in FLII) interacting protein 2 [Source:MGI Symbol;Acc:MGI:1918518]
ENSMUSG00000031556	-0.441511	2.29128e-13	1.9267	1.46936	Tm2d2	protein_coding	TM2 domain containing 2 [Source:MGI Symbol;Acc:MGI:1916992]
ENSMUSG00000025813	-1.53811	2.34025e-13	4.6905	3.1121	Homer2	protein_coding	homer scaffolding protein 2 [Source:MGI Symbol;Acc:MGI:1347354]
ENSMUSG00000033863	-1.35321	2.37838e-13	3.19816	1.82189	Klf9	protein_coding	Kruppel-like factor 9 [Source:MGI Symbol;Acc:MGI:1333856]
ENSMUSG00000036550	-1.45123	2.38011e-13	3.49613	2.01824	Cnot1	protein_coding	CCR4-NOT transcription complex, subunit 1 [Source:MGI Symbol;Acc:MGI:2442402]
ENSMUSG00000061136	-2.22157	2.38011e-13	3.96175	1.71255	Prpf40a	protein_coding	pre-mRNA processing factor 40A [Source:MGI Symbol;Acc:MGI:1860512]
ENSMUSG00000015937	-1.57096	2.50045e-13	2.49705	0.903896	H2afy	protein_coding	H2A histone family, member Y [Source:MGI Symbol;Acc:MGI:1349392]
ENSMUSG00000039176	-0.954896	2.50626e-13	1.8741	0.9019	Polg	protein_coding	polymerase (DNA directed), gamma [Source:MGI Symbol;Acc:MGI:1196389]
ENSMUSG00000020936	-1.11507	2.53856e-13	3.0545	1.91752	Nmt1	protein_coding	N-myristoyltransferase 1 [Source:MGI Symbol;Acc:MGI:102579]
ENSMUSG00000009073	-0.86002	2.57086e-13	2.08018	1.20254	Nf2	protein_coding	neurofibromin 2 [Source:MGI Symbol;Acc:MGI:97307]
ENSMUSG00000029431	-0.792287	2.58995e-13	0.972535	0.165172	B3gnt4	protein_coding	UDP-GlcNAc:betaGal beta-1,3-N-acetylglucosaminyltransferase 4 [Source:MGI Symbol;Acc:MGI:2680208]
ENSMUSG00000078889	-0.833956	2.63945e-13	1.89592	1.04359	Gm14288	protein_coding	predicted gene 14288 [Source:MGI Symbol;Acc:MGI:3706570]
ENSMUSG00000029014	-1.52425	2.63945e-13	3.6253	2.07352	Dnajc2	protein_coding	DnaJ heat shock protein family (Hsp40) member C2 [Source:MGI Symbol;Acc:MGI:99470]
ENSMUSG00000029455	-1.23464	2.76173e-13	2.97062	1.71313	Aldh2	protein_coding	aldehyde dehydrogenase 2, mitochondrial [Source:MGI Symbol;Acc:MGI:99600]
ENSMUSG00000028161	-1.98463	2.76173e-13	3.80441	1.7933	Ppp3ca	protein_coding	protein phosphatase 3, catalytic subunit, alpha isoform [Source:MGI Symbol;Acc:MGI:107164]
ENSMUSG00000015755	-1.29775	2.78256e-13	2.48369	1.16592	Tab2	protein_coding	TGF-beta activated kinase 1/MAP3K7 binding protein 2 [Source:MGI Symbol;Acc:MGI:1915902]
ENSMUSG00000021550	-1.58204	2.78256e-13	2.36937	0.769847	2210016F16Rik	protein_coding	RIKEN cDNA 2210016F16 gene [Source:MGI Symbol;Acc:MGI:1917403]
ENSMUSG00000070319	-1.4472	2.78705e-13	3.29797	1.82691	Eif3g	protein_coding	eukaryotic translation initiation factor 3, subunit G [Source:MGI Symbol;Acc:MGI:1858258]
ENSMUSG00000033439	-1.24807	2.80279e-13	3.30009	2.0281	Trmt13	protein_coding	tRNA methyltransferase 13 [Source:MGI Symbol;Acc:MGI:1925219]
ENSMUSG00000065979	-1.73051	2.82137e-13	3.82099	2.06298	Cpped1	protein_coding	calcineurin-like phosphoesterase domain containing 1 [Source:MGI Symbol;Acc:MGI:2443300]
ENSMUSG00000031848	-1.98903	2.86914e-13	3.7394	1.72513	Lsm4	protein_coding	LSM4 homolog, U6 small nuclear RNA and mRNA degradation associated [Source:MGI Symbol;Acc:MGI:1354692]
ENSMUSG00000028837	-1.5187	2.99764e-13	3.76878	2.22178	Psmb2	protein_coding	proteasome (prosome, macropain) subunit, beta type 2 [Source:MGI Symbol;Acc:MGI:1347045]
ENSMUSG00000031916	-1.81861	3.19324e-13	4.10284	2.25479	Cog8	protein_coding	component of oligomeric golgi complex 8 [Source:MGI Symbol;Acc:MGI:2142885]
ENSMUSG00000075704	-1.97958	3.19324e-13	3.73258	1.7259	Txnrd2	protein_coding	thioredoxin reductase 2 [Source:MGI Symbol;Acc:MGI:1347023]
ENSMUSG00000030613	-2.22283	3.24973e-13	3.72879	1.47973	Ccdc90b	protein_coding	coiled-coil domain containing 90B [Source:MGI Symbol;Acc:MGI:1913615]
ENSMUSG00000113149	-1.02669	3.25925e-13	3.53756	2.48601	AC099934.3	protein_coding
ENSMUSG00000021666	-1.99542	3.36033e-13	3.71163	1.68952	Gfm2	protein_coding	G elongation factor, mitochondrial 2 [Source:MGI Symbol;Acc:MGI:2444783]
ENSMUSG00000042870	-1.27157	3.39478e-13	2.56553	1.27542	Tom1	protein_coding	target of myb1 trafficking protein [Source:MGI Symbol;Acc:MGI:1338026]
ENSMUSG00000019763	-1.30725	3.39478e-13	2.47968	1.15334	Rmnd1	protein_coding	required for meiotic nuclear division 1 homolog [Source:MGI Symbol;Acc:MGI:1913334]
ENSMUSG00000027999	-1.24111	3.39962e-13	3.15944	1.89508	Pla2g12a	protein_coding	phospholipase A2, group XIIA [Source:MGI Symbol;Acc:MGI:1913600]
ENSMUSG00000020570	-2.30531	3.40122e-13	5.13572	2.7927	Sypl	protein_coding	synaptophysin-like protein [Source:MGI Symbol;Acc:MGI:108081]
ENSMUSG00000036073	-1.58764	3.41076e-13	2.48721	0.879807	Galt	protein_coding	galactose-1-phosphate uridyl transferase [Source:MGI Symbol;Acc:MGI:95638]
ENSMUSG00000071451	-1.36171	3.61396e-13	2.55452	1.16962	Psmg4	protein_coding	proteasome (prosome, macropain) assembly chaperone 4 [Source:MGI Symbol;Acc:MGI:1916916]
ENSMUSG00000032403	-1.0801	3.66741e-13	2.23224	1.13524	2300009A05Rik	protein_coding	RIKEN cDNA 2300009A05 gene [Source:MGI Symbol;Acc:MGI:1916728]
ENSMUSG00000057789	-0.373385	3.67901e-13	0.856108	0.471885	Bak1	protein_coding	BCL2-antagonist/killer 1 [Source:MGI Symbol;Acc:MGI:1097161]
ENSMUSG00000030062	-0.945343	3.73372e-13	2.3697	1.40543	Rpn1	protein_coding	ribophorin I [Source:MGI Symbol;Acc:MGI:98084]
ENSMUSG00000068479	-0.617769	3.87865e-13	2.34571	1.71081	Mfap1a	protein_coding	microfibrillar-associated protein 1A [Source:MGI Symbol;Acc:MGI:1914782]
ENSMUSG00000010362	-0.734105	3.87865e-13	2.01061	1.26039	Rdm1	protein_coding	RAD52 motif 1 [Source:MGI Symbol;Acc:MGI:1913849]
ENSMUSG00000008035	-1.79595	3.87865e-13	4.51782	2.68737	Mid1ip1	protein_coding	Mid1 interacting protein 1 (gastrulation specific G12-like (zebrafish)) [Source:MGI Symbol;Acc:MGI:1915291]
ENSMUSG00000021482	-1.82744	3.90042e-13	2.78843	0.935604	Aaed1	protein_coding	AhpC/TSA antioxidant enzyme domain containing 1 [Source:MGI Symbol;Acc:MGI:1913379]
ENSMUSG00000022255	-1.01964	4.00572e-13	3.40692	2.36285	Mtdh	protein_coding	metadherin [Source:MGI Symbol;Acc:MGI:1914404]
ENSMUSG00000000253	-1.03851	4.00572e-13	2.8814	1.82149	Gmpr	protein_coding	guanosine monophosphate reductase [Source:MGI Symbol;Acc:MGI:1913605]
ENSMUSG00000039452	-0.566346	4.03193e-13	2.18745	1.60409	Snx22	protein_coding	sorting nexin 22 [Source:MGI Symbol;Acc:MGI:2685966]
ENSMUSG00000034708	-1.21911	4.07032e-13	2.00809	0.773591	Grn	protein_coding	granulin [Source:MGI Symbol;Acc:MGI:95832]
ENSMUSG00000040883	-2.20866	4.07032e-13	5.07211	2.82617	Tmem205	protein_coding	transmembrane protein 205 [Source:MGI Symbol;Acc:MGI:3045495]
ENSMUSG00000057411	-0.706939	4.18348e-13	2.23066	1.50648	Fam173a	protein_coding	family with sequence similarity 173, member A [Source:MGI Symbol;Acc:MGI:2384888]
ENSMUSG00000022390	-0.601891	4.41301e-13	1.35846	0.741106	Zc3h7b	protein_coding	zinc finger CCCH type containing 7B [Source:MGI Symbol;Acc:MGI:1328310]
ENSMUSG00000070283	-0.892397	4.41301e-13	2.48664	1.5755	Ndufaf3	protein_coding	NADH dehydrogenase (ubiquinone) 1 alpha subcomplex, assembly factor 3 [Source:MGI Symbol;Acc:MGI:1913956]
ENSMUSG00000031176	-0.947583	4.41301e-13	2.81008	1.84127	Dynlt3	protein_coding	dynein light chain Tctex-type 3 [Source:MGI Symbol;Acc:MGI:1914367]
ENSMUSG00000003316	-0.991353	4.41301e-13	2.82735	1.81526	Glg1	protein_coding	golgi apparatus protein 1 [Source:MGI Symbol;Acc:MGI:104967]
ENSMUSG00000026811	-1.02053	4.41301e-13	1.9755	0.93419	St6galnac6	protein_coding	ST6 (alpha-N-acetyl-neuraminyl-2,3-beta-galactosyl-1,3)-N-acetylgalactosaminide alpha-2,6-sialyltransferase 6 [Source:MGI Symbol;Acc:MGI:1355316]
ENSMUSG00000022723	-1.35933	4.41301e-13	2.37388	0.995241	Crybg3	protein_coding	beta-gamma crystallin domain containing 3 [Source:MGI Symbol;Acc:MGI:2676311]
ENSMUSG00000021116	-1.1143	4.59463e-13	2.67816	1.54346	Eif2s1	protein_coding	eukaryotic translation initiation factor 2, subunit 1 alpha [Source:MGI Symbol;Acc:MGI:95299]
ENSMUSG00000028410	-1.87234	4.60248e-13	3.93281	2.03291	Dnaja1	protein_coding	DnaJ heat shock protein family (Hsp40) member A1 [Source:MGI Symbol;Acc:MGI:1270129]
ENSMUSG00000028907	-0.932101	4.62974e-13	1.87133	0.922346	Utp11	protein_coding	UTP11 small subunit processome component [Source:MGI Symbol;Acc:MGI:1914455]
ENSMUSG00000021646	-1.24678	4.72934e-13	2.49237	1.226	Mccc2	protein_coding	methylcrotonoyl-Coenzyme A carboxylase 2 (beta) [Source:MGI Symbol;Acc:MGI:1925288]
ENSMUSG00000000339	-0.863025	4.73518e-13	1.55836	0.678432	Rtca	protein_coding	RNA 3'-terminal phosphate cyclase [Source:MGI Symbol;Acc:MGI:1913618]
ENSMUSG00000027091	-1.47034	4.75658e-13	3.62724	2.13054	Zc3h15	protein_coding	zinc finger CCCH-type containing 15 [Source:MGI Symbol;Acc:MGI:1919747]
ENSMUSG00000042404	-1.46895	4.76697e-13	2.15855	0.66905	Dennd4b	protein_coding	DENN/MADD domain containing 4B [Source:MGI Symbol;Acc:MGI:2446201]
ENSMUSG00000029629	-1.36159	4.84631e-13	2.94501	1.55985	Phf14	protein_coding	PHD finger protein 14 [Source:MGI Symbol;Acc:MGI:1923539]
ENSMUSG00000006418	-1.65392	4.84631e-13	3.01554	1.33817	Rnf114	protein_coding	ring finger protein 114 [Source:MGI Symbol;Acc:MGI:1933159]
ENSMUSG00000037458	-1.6309	5.00095e-13	2.8715	1.21857	Azin1	protein_coding	antizyme inhibitor 1 [Source:MGI Symbol;Acc:MGI:1859169]
ENSMUSG00000066324	-1.44358	5.25747e-13	2.81319	1.34909	Impad1	protein_coding	inositol monophosphatase domain containing 1 [Source:MGI Symbol;Acc:MGI:1915720]
ENSMUSG00000062376	-0.900442	5.31943e-13	1.92873	1.0079	Borcs7	protein_coding	BLOC-1 related complex subunit 7 [Source:MGI Symbol;Acc:MGI:1913689]
ENSMUSG00000064288	-1.1798	5.42983e-13	1.71576	0.513575	Hist1h4k	protein_coding	histone cluster 1, H4k [Source:MGI Symbol;Acc:MGI:2448439]
ENSMUSG00000063888	-0.811387	5.62772e-13	1.98788	1.15926	Rpl7l1	protein_coding	ribosomal protein L7-like 1 [Source:MGI Symbol;Acc:MGI:1913479]
ENSMUSG00000027636	-1.69082	5.77946e-13	3.44109	1.72375	Sla2	protein_coding	Src-like-adaptor 2 [Source:MGI Symbol;Acc:MGI:1925049]
ENSMUSG00000091337	-1.00766	5.88518e-13	1.93659	0.910447	Eid1	protein_coding	EP300 interacting inhibitor of differentiation 1 [Source:MGI Symbol;Acc:MGI:1889651]
ENSMUSG00000027130	-1.76632	5.99146e-13	3.4489	1.65879	Slc12a6	protein_coding	solute carrier family 12, member 6 [Source:MGI Symbol;Acc:MGI:2135960]
ENSMUSG00000041168	-1.26957	6.11136e-13	3.69389	2.39429	Lonp1	protein_coding	lon peptidase 1, mitochondrial [Source:MGI Symbol;Acc:MGI:1921392]
ENSMUSG00000093930	-1.4435	6.11136e-13	2.18263	0.717747	Hmgcs1	protein_coding	3-hydroxy-3-methylglutaryl-Coenzyme A synthase 1 [Source:MGI Symbol;Acc:MGI:107592]
ENSMUSG00000041650	-1.05834	6.1989e-13	2.96445	1.88403	Pcca	protein_coding	propionyl-Coenzyme A carboxylase, alpha polypeptide [Source:MGI Symbol;Acc:MGI:97499]
ENSMUSG00000032086	-1.26095	6.32014e-13	2.77092	1.48888	Bace1	protein_coding	beta-site APP cleaving enzyme 1 [Source:MGI Symbol;Acc:MGI:1346542]
ENSMUSG00000022201	-1.20872	6.44042e-13	3.13355	1.90216	Zfr	protein_coding	zinc finger RNA binding protein [Source:MGI Symbol;Acc:MGI:1341890]
ENSMUSG00000024187	-0.857302	6.4518e-13	3.48799	2.60511	Fam234a	protein_coding	family with sequence similarity 234, member A [Source:MGI Symbol;Acc:MGI:2146854]
ENSMUSG00000020519	-1.18045	6.4518e-13	2.04082	0.843916	Sap30l	protein_coding	SAP30-like [Source:MGI Symbol;Acc:MGI:1354709]
ENSMUSG00000024436	-1.66123	6.4518e-13	4.25101	2.55703	Mrps18b	protein_coding	mitochondrial ribosomal protein S18B [Source:MGI Symbol;Acc:MGI:1914223]
ENSMUSG00000024150	-1.95712	6.80741e-13	3.67192	1.68983	Mcfd2	protein_coding	multiple coagulation factor deficiency 2 [Source:MGI Symbol;Acc:MGI:2183439]
ENSMUSG00000058932	-0.823105	6.87715e-13	2.23201	1.39289	Gm2174	protein_coding	predicted gene 2174 [Source:MGI Symbol;Acc:MGI:3780344]
ENSMUSG00000003810	-2.49738	7.0343e-13	4.23895	1.71816	Mast2	protein_coding	microtubule associated serine/threonine kinase 2 [Source:MGI Symbol;Acc:MGI:894676]
ENSMUSG00000028138	-0.981226	7.05691e-13	3.08484	2.08115	Adh5	protein_coding	alcohol dehydrogenase 5 (class III), chi polypeptide [Source:MGI Symbol;Acc:MGI:87929]
ENSMUSG00000030232	-1.68527	7.2575e-13	2.83671	1.12954	Aebp2	protein_coding	AE binding protein 2 [Source:MGI Symbol;Acc:MGI:1338038]
ENSMUSG00000030986	-1.83153	7.27e-13	4.14684	2.28629	Dhx32	protein_coding	DEAH (Asp-Glu-Ala-His) box polypeptide 32 [Source:MGI Symbol;Acc:MGI:2141813]
ENSMUSG00000078184	-0.488103	7.34437e-13	0.874432	0.373359	Rbm8a2	protein_coding	RNA binding motif protein 8A2 [Source:MGI Symbol;Acc:MGI:3612447]
ENSMUSG00000029310	-1.52646	7.41327e-13	2.65213	1.10609	Nudt9	protein_coding	nudix (nucleoside diphosphate linked moiety X)-type motif 9 [Source:MGI Symbol;Acc:MGI:1921417]
ENSMUSG00000091695	-0.646407	7.56528e-13	1.47401	0.813827	Gm17669	protein_coding	predicted gene, 17669 [Source:MGI Symbol;Acc:MGI:4937303]
ENSMUSG00000028838	-0.717992	7.57686e-13	1.26475	0.530418	Extl1	protein_coding	exostoses (multiple)-like 1 [Source:MGI Symbol;Acc:MGI:1888742]
ENSMUSG00000018326	-1.21138	7.57686e-13	2.64424	1.41402	Ywhab	protein_coding	tyrosine 3-monooxygenase/tryptophan 5-monooxygenase activation protein, beta polypeptide [Source:MGI Symbol;Acc:MGI:1891917]
ENSMUSG00000022389	-0.941432	7.61913e-13	2.83456	1.87255	Tef	protein_coding	thyrotroph embryonic factor [Source:MGI Symbol;Acc:MGI:98663]
ENSMUSG00000034723	-1.9043	8.06482e-13	3.12874	1.20656	Tmx4	protein_coding	thioredoxin-related transmembrane protein 4 [Source:MGI Symbol;Acc:MGI:106558]
ENSMUSG00000030614	-1.22323	8.44525e-13	2.2549	1.01337	Tmem126b	protein_coding	transmembrane protein 126B [Source:MGI Symbol;Acc:MGI:1915722]
ENSMUSG00000042524	-1.64043	8.46563e-13	3.04882	1.38499	Sun2	protein_coding	Sad1 and UNC84 domain containing 2 [Source:MGI Symbol;Acc:MGI:2443011]
ENSMUSG00000033032	-1.16803	8.62755e-13	2.58821	1.4004	Afap1l1	protein_coding	actin filament associated protein 1-like 1 [Source:MGI Symbol;Acc:MGI:2147199]
ENSMUSG00000028343	-1.22072	8.62755e-13	1.9896	0.750469	Erp44	protein_coding	endoplasmic reticulum protein 44 [Source:MGI Symbol;Acc:MGI:1923549]
ENSMUSG00000047379	-1.16017	8.90578e-13	2.32427	1.14608	B4gat1	protein_coding	beta-1,4-glucuronyltransferase 1 [Source:MGI Symbol;Acc:MGI:1919680]
ENSMUSG00000020459	-1.50587	9.01806e-13	3.25787	1.727	Mtif2	protein_coding	mitochondrial translational initiation factor 2 [Source:MGI Symbol;Acc:MGI:1924034]
ENSMUSG00000039361	-2.11121	9.16841e-13	4.51815	2.37509	Picalm	protein_coding	phosphatidylinositol binding clathrin assembly protein [Source:MGI Symbol;Acc:MGI:2385902]
ENSMUSG00000028291	-0.703168	9.47569e-13	1.62326	0.903684	Akirin2	protein_coding	akirin 2 [Source:MGI Symbol;Acc:MGI:1889364]
ENSMUSG00000031511	-1.14998	9.60302e-13	2.84244	1.67008	Arhgef7	protein_coding	Rho guanine nucleotide exchange factor (GEF7) [Source:MGI Symbol;Acc:MGI:1860493]
ENSMUSG00000021493	-1.24154	9.81467e-13	2.89867	1.63456	Pdlim7	protein_coding	PDZ and LIM domain 7 [Source:MGI Symbol;Acc:MGI:1914649]
ENSMUSG00000009075	-0.508131	9.89192e-13	1.26875	0.743925	Cabp7	protein_coding	calcium binding protein 7 [Source:MGI Symbol;Acc:MGI:2183437]
ENSMUSG00000025979	-1.77158	9.91057e-13	3.03166	1.2396	Mob4	protein_coding	MOB family member 4, phocein [Source:MGI Symbol;Acc:MGI:104899]
ENSMUSG00000034211	-2.58586	9.9338e-13	6.04797	3.41891	Mrps17	protein_coding	mitochondrial ribosomal protein S17 [Source:MGI Symbol;Acc:MGI:1913508]
ENSMUSG00000047879	-1.55588	1.02258e-12	3.56544	1.98452	Usp14	protein_coding	ubiquitin specific peptidase 14 [Source:MGI Symbol;Acc:MGI:1928898]
ENSMUSG00000030016	-1.59656	1.0231e-12	2.83919	1.21498	Zfp638	protein_coding	zinc finger protein 638 [Source:MGI Symbol;Acc:MGI:1203484]
ENSMUSG00000020124	-1.46851	1.02893e-12	4.09674	2.59872	Usp15	protein_coding	ubiquitin specific peptidase 15 [Source:MGI Symbol;Acc:MGI:101857]
ENSMUSG00000021820	-1.65306	1.02893e-12	2.15342	0.480781	Camk2g	protein_coding	calcium/calmodulin-dependent protein kinase II gamma [Source:MGI Symbol;Acc:MGI:88259]
ENSMUSG00000008540	-2.42776	1.07318e-12	3.97674	1.52851	Mgst1	protein_coding	microsomal glutathione S-transferase 1 [Source:MGI Symbol;Acc:MGI:1913850]
ENSMUSG00000013622	-1.18614	1.09663e-12	2.80202	1.59571	Atraid	protein_coding	all-trans retinoic acid induced differentiation factor [Source:MGI Symbol;Acc:MGI:1918918]
ENSMUSG00000041740	-1.38774	1.09663e-12	3.47464	2.06219	Rnf10	protein_coding	ring finger protein 10 [Source:MGI Symbol;Acc:MGI:1859162]
ENSMUSG00000036282	-1.2223	1.10997e-12	2.01764	0.774079	Naa30	protein_coding	N(alpha)-acetyltransferase 30, NatC catalytic subunit [Source:MGI Symbol;Acc:MGI:1922259]
ENSMUSG00000040631	-0.285114	1.11061e-12	1.689	1.3922	Dok4	protein_coding	docking protein 4 [Source:MGI Symbol;Acc:MGI:2148865]
ENSMUSG00000031529	-0.739784	1.11061e-12	1.7999	1.0421	Tnks	protein_coding	tankyrase, TRF1-interacting ankyrin-related ADP-ribose polymerase [Source:MGI Symbol;Acc:MGI:1341087]
ENSMUSG00000031753	-0.898748	1.11061e-12	2.23659	1.31998	Cog4	protein_coding	component of oligomeric golgi complex 4 [Source:MGI Symbol;Acc:MGI:2142808]
ENSMUSG00000071076	-0.603677	1.12428e-12	1.72824	1.11141	Jund	protein_coding	jun D proto-oncogene [Source:MGI Symbol;Acc:MGI:96648]
ENSMUSG00000052293	-1.75664	1.12596e-12	4.16896	2.38325	Taf9	protein_coding	TATA-box binding protein associated factor 9 [Source:MGI Symbol;Acc:MGI:1888697]
ENSMUSG00000028419	-1.0131	1.12689e-12	1.79582	0.766277	Chmp5	protein_coding	charged multivesicular body protein 5 [Source:MGI Symbol;Acc:MGI:1924209]
ENSMUSG00000026991	-2.38528	1.15616e-12	4.35569	1.94058	Pkp4	protein_coding	plakophilin 4 [Source:MGI Symbol;Acc:MGI:109281]
ENSMUSG00000071052	-0.633349	1.16609e-12	2.10549	1.45714	Rpl7a-ps5	protein_coding	ribosomal protein L7A, pseudogene 5 [Source:MGI Symbol;Acc:MGI:3643553]
ENSMUSG00000040694	-1.69881	1.16646e-12	4.65498	2.91712	Apobec2	protein_coding	apolipoprotein B mRNA editing enzyme, catalytic polypeptide 2 [Source:MGI Symbol;Acc:MGI:1343178]
ENSMUSG00000032615	-0.845128	1.1707e-12	1.55846	0.697678	Nt5m	protein_coding	5',3'-nucleotidase, mitochondrial [Source:MGI Symbol;Acc:MGI:1917127]
ENSMUSG00000022544	-0.996369	1.1871e-12	1.53287	0.51677	Eef2kmt	protein_coding	eukaryotic elongation factor 2 lysine methyltransferase [Source:MGI Symbol;Acc:MGI:1917761]
ENSMUSG00000026586	-1.32255	1.19194e-12	3.50877	2.16159	Prrx1	protein_coding	paired related homeobox 1 [Source:MGI Symbol;Acc:MGI:97712]
ENSMUSG00000019802	-1.53807	1.19194e-12	3.40539	1.84379	Sec63	protein_coding	SEC63-like (S. cerevisiae) [Source:MGI Symbol;Acc:MGI:2155302]
ENSMUSG00000025858	-1.36309	1.20874e-12	2.68455	1.30207	Get4	protein_coding	golgi to ER traffic protein 4 [Source:MGI Symbol;Acc:MGI:1914854]
ENSMUSG00000041203	-1.04471	1.21647e-12	2.4598	1.39632	Trir	protein_coding	telomerase RNA component interacting RNase [Source:MGI Symbol;Acc:MGI:1922833]
ENSMUSG00000037110	-1.21714	1.22548e-12	2.53439	1.29715	Ralgapa2	protein_coding	Ral GTPase activating protein, alpha subunit 2 (catalytic) [Source:MGI Symbol;Acc:MGI:3036245]
ENSMUSG00000000568	-1.17976	1.23173e-12	2.79476	1.59171	Hnrnpd	protein_coding	heterogeneous nuclear ribonucleoprotein D [Source:MGI Symbol;Acc:MGI:101947]
ENSMUSG00000015165	-1.30842	1.25498e-12	2.64911	1.32115	Hnrnpl	protein_coding	heterogeneous nuclear ribonucleoprotein L [Source:MGI Symbol;Acc:MGI:104816]
ENSMUSG00000056666	-1.78194	1.27103e-12	2.7825	0.981197	Retsat	protein_coding	retinol saturase (all trans retinol 13,14 reductase) [Source:MGI Symbol;Acc:MGI:1914692]
ENSMUSG00000019373	-1.23126	1.2965e-12	3.2815	2.02703	Cops3	protein_coding	COP9 signalosome subunit 3 [Source:MGI Symbol;Acc:MGI:1349409]
ENSMUSG00000021000	-2.36624	1.29825e-12	4.8053	2.40388	Ctage5	protein_coding	melanoma inhibitory activity 2 [Source:MGI Symbol;Acc:MGI:2159614]
ENSMUSG00000037601	-1.09414	1.35309e-12	2.69693	1.58326	Nme1	protein_coding	NME/NM23 nucleoside diphosphate kinase 1 [Source:MGI Symbol;Acc:MGI:97355]
ENSMUSG00000070544	-1.15795	1.35309e-12	2.98194	1.80256	Top1	protein_coding	topoisomerase (DNA) I [Source:MGI Symbol;Acc:MGI:98788]
ENSMUSG00000028035	-2.29545	1.38858e-12	5.30804	2.9747	Dnajb4	protein_coding	DnaJ heat shock protein family (Hsp40) member B4 [Source:MGI Symbol;Acc:MGI:1914285]
ENSMUSG00000004460	-1.50729	1.4338e-12	2.61034	1.08224	Dnajb11	protein_coding	DnaJ heat shock protein family (Hsp40) member B11 [Source:MGI Symbol;Acc:MGI:1915088]
ENSMUSG00000020180	-1.11418	1.43888e-12	2.79875	1.66468	Snrpd3	protein_coding	small nuclear ribonucleoprotein D3 [Source:MGI Symbol;Acc:MGI:1914582]
ENSMUSG00000027357	-1.4702	1.44107e-12	2.39449	0.904414	Crls1	protein_coding	cardiolipin synthase 1 [Source:MGI Symbol;Acc:MGI:1913836]
ENSMUSG00000031303	-1.41227	1.44347e-12	3.64327	2.20459	Map3k15	protein_coding	mitogen-activated protein kinase kinase kinase 15 [Source:MGI Symbol;Acc:MGI:2448588]
ENSMUSG00000038696	-1.56106	1.51131e-12	2.54204	0.956012	Mapkap1	protein_coding	mitogen-activated protein kinase associated protein 1 [Source:MGI Symbol;Acc:MGI:2444554]
ENSMUSG00000026553	-1.43622	1.51299e-12	3.13676	1.67838	Copa	protein_coding	coatomer protein complex subunit alpha [Source:MGI Symbol;Acc:MGI:1334462]
ENSMUSG00000027573	-1.81827	1.53563e-12	2.85958	1.02027	Gid8	protein_coding	GID complex subunit 8 [Source:MGI Symbol;Acc:MGI:1923675]
ENSMUSG00000054021	-1.84512	1.54003e-12	2.89887	1.03244	Sirt5	protein_coding	sirtuin 5 [Source:MGI Symbol;Acc:MGI:1915596]
ENSMUSG00000067925	-1.0184	1.55043e-12	2.43011	1.39413	Rtl8a	protein_coding	retrotransposon Gag like 8A [Source:MGI Symbol;Acc:MGI:1913408]
ENSMUSG00000027599	-1.17302	1.58916e-12	2.64802	1.45541	Armc1	protein_coding	armadillo repeat containing 1 [Source:MGI Symbol;Acc:MGI:1921502]
ENSMUSG00000063200	-1.63331	1.63921e-12	4.19538	2.53045	Nol7	protein_coding	nucleolar protein 7 [Source:MGI Symbol;Acc:MGI:1917328]
ENSMUSG00000032826	-1.76378	1.67606e-12	4.20638	2.41255	Ank2	protein_coding	ankyrin 2, brain [Source:MGI Symbol;Acc:MGI:88025]
ENSMUSG00000053644	-1.48515	1.67954e-12	2.0327	0.523216	Aldh7a1	protein_coding	aldehyde dehydrogenase family 7, member A1 [Source:MGI Symbol;Acc:MGI:108186]
ENSMUSG00000002342	-1.82252	1.67954e-12	3.5016	1.6565	Tmem161a	protein_coding	transmembrane protein 161A [Source:MGI Symbol;Acc:MGI:2384577]
ENSMUSG00000034066	-0.876061	1.69038e-12	1.59131	0.70055	Farp2	protein_coding	FERM, RhoGEF and pleckstrin domain protein 2 [Source:MGI Symbol;Acc:MGI:2385126]
ENSMUSG00000030168	-1.36901	1.73805e-12	3.31093	1.91872	Adipor2	protein_coding	adiponectin receptor 2 [Source:MGI Symbol;Acc:MGI:93830]
ENSMUSG00000002741	-0.952748	1.74677e-12	1.66462	0.693859	Ykt6	protein_coding	YKT6 v-SNARE homolog (S. cerevisiae) [Source:MGI Symbol;Acc:MGI:1927550]
ENSMUSG00000020738	-1.94567	1.76211e-12	5.61755	3.62736	Sumo2	protein_coding	small ubiquitin-like modifier 2 [Source:MGI Symbol;Acc:MGI:2158813]
ENSMUSG00000039115	-1.00071	1.76257e-12	2.14142	1.12412	Itga9	protein_coding	integrin alpha 9 [Source:MGI Symbol;Acc:MGI:104756]
ENSMUSG00000024019	-0.639665	1.76893e-12	1.69305	1.03701	Cmtr1	protein_coding	cap methyltransferase 1 [Source:MGI Symbol;Acc:MGI:1921407]
ENSMUSG00000074781	-0.449148	1.81773e-12	1.63328	1.17033	Ube2n	protein_coding	ubiquitin-conjugating enzyme E2N [Source:MGI Symbol;Acc:MGI:1934835]
ENSMUSG00000027011	-1.5115	1.81773e-12	3.00547	1.47404	Ube2e3	protein_coding	ubiquitin-conjugating enzyme E2E 3 [Source:MGI Symbol;Acc:MGI:107412]
ENSMUSG00000043866	-1.27844	1.84032e-12	3.33366	2.03187	Taf10	protein_coding	TATA-box binding protein associated factor 10 [Source:MGI Symbol;Acc:MGI:1346320]
ENSMUSG00000026393	-1.97541	1.8587e-12	4.63676	2.62913	Nek7	protein_coding	NIMA (never in mitosis gene a)-related expressed kinase 7 [Source:MGI Symbol;Acc:MGI:1890645]
ENSMUSG00000066036	-1.8223	1.89857e-12	4.03327	2.18357	Ubr4	protein_coding	ubiquitin protein ligase E3 component n-recognin 4 [Source:MGI Symbol;Acc:MGI:1916366]
ENSMUSG00000042978	-1.01899	1.93524e-12	1.98384	0.948849	Sbk1	protein_coding	SH3-binding kinase 1 [Source:MGI Symbol;Acc:MGI:2135937]
ENSMUSG00000030127	-0.941295	2.00906e-12	2.08823	1.13131	Cops7a	protein_coding	COP9 signalosome subunit 7A [Source:MGI Symbol;Acc:MGI:1349400]
ENSMUSG00000026626	-1.44705	2.03904e-12	3.9615	2.48018	Ppp2r5a	protein_coding	protein phosphatase 2, regulatory subunit B', alpha [Source:MGI Symbol;Acc:MGI:2388479]
ENSMUSG00000018858	-2.32816	2.03904e-12	5.41905	3.05254	Mrpl58	protein_coding	mitochondrial ribosomal protein L58 [Source:MGI Symbol;Acc:MGI:1915822]
ENSMUSG00000079243	-0.669754	2.12307e-12	3.30794	2.60997	Xirp1	protein_coding	xin actin-binding repeat containing 1 [Source:MGI Symbol;Acc:MGI:1333878]
ENSMUSG00000064326	-1.0504	2.19613e-12	3.05953	1.98735	Siva1	protein_coding	SIVA1, apoptosis-inducing factor [Source:MGI Symbol;Acc:MGI:1353606]
ENSMUSG00000021866	-0.565954	2.19939e-12	1.28524	0.70756	Anxa11	protein_coding	annexin A11 [Source:MGI Symbol;Acc:MGI:108481]
ENSMUSG00000026466	-1.94914	2.21619e-12	5.05789	3.0701	Tor1aip1	protein_coding	torsin A interacting protein 1 [Source:MGI Symbol;Acc:MGI:3582693]
ENSMUSG00000004035	-0.716913	2.27172e-12	1.51057	0.77829	Gstm7	protein_coding	glutathione S-transferase, mu 7 [Source:MGI Symbol;Acc:MGI:1915562]
ENSMUSG00000017286	-1.04179	2.3601e-12	1.78399	0.722062	Glod4	protein_coding	glyoxalase domain containing 4 [Source:MGI Symbol;Acc:MGI:1914451]
ENSMUSG00000021311	-0.969069	2.36327e-12	2.76457	1.77579	Mtr	protein_coding	5-methyltetrahydrofolate-homocysteine methyltransferase [Source:MGI Symbol;Acc:MGI:894292]
ENSMUSG00000023952	-0.621082	2.41715e-12	1.20691	0.570345	Gtpbp2	protein_coding	GTP binding protein 2 [Source:MGI Symbol;Acc:MGI:1860138]
ENSMUSG00000031913	-1.03925	2.42377e-12	2.37212	1.31504	Vps4a	protein_coding	vacuolar protein sorting 4A [Source:MGI Symbol;Acc:MGI:1890520]
ENSMUSG00000031667	-1.50028	2.42377e-12	4.96092	3.42307	Aktip	protein_coding	thymoma viral proto-oncogene 1 interacting protein [Source:MGI Symbol;Acc:MGI:3693832]
ENSMUSG00000062901	-1.39417	2.44504e-12	3.90847	2.48534	Klhl24	protein_coding	kelch-like 24 [Source:MGI Symbol;Acc:MGI:1923035]
ENSMUSG00000020571	-1.00336	2.48201e-12	2.33701	1.31602	Pdia6	protein_coding	protein disulfide isomerase associated 6 [Source:MGI Symbol;Acc:MGI:1919103]
ENSMUSG00000025736	-1.78595	2.50322e-12	5.0662	3.24164	Jmjd8	protein_coding	jumonji domain containing 8 [Source:MGI Symbol;Acc:MGI:1919356]
ENSMUSG00000027109	-0.728789	2.54249e-12	1.32224	0.575904	Sp3	protein_coding	trans-acting transcription factor 3 [Source:MGI Symbol;Acc:MGI:1277166]
ENSMUSG00000024074	-1.11726	2.54249e-12	1.85734	0.724524	Crim1	protein_coding	cysteine rich transmembrane BMP regulator 1 (chordin like) [Source:MGI Symbol;Acc:MGI:1354756]
ENSMUSG00000030272	-1.1579	2.54249e-12	2.78837	1.6109	Camk1	protein_coding	calcium/calmodulin-dependent protein kinase I [Source:MGI Symbol;Acc:MGI:1098535]
ENSMUSG00000064373	-1.77085	2.54249e-12	3.67167	1.87562	Selenop	protein_coding	selenoprotein P [Source:MGI Symbol;Acc:MGI:894288]
ENSMUSG00000105340	-1.04676	2.59501e-12	2.91929	1.85215	Gm42878	protein_coding	predicted gene 42878 [Source:MGI Symbol;Acc:MGI:5663015]
ENSMUSG00000020440	-0.800669	2.60324e-12	1.81568	1.00076	Arf5	protein_coding	ADP-ribosylation factor 5 [Source:MGI Symbol;Acc:MGI:99434]
ENSMUSG00000020705	-1.04294	2.63746e-12	1.45832	0.397384	Ddx42	protein_coding	DEAD (Asp-Glu-Ala-Asp) box polypeptide 42 [Source:MGI Symbol;Acc:MGI:1919297]
ENSMUSG00000074582	-1.38989	2.65706e-12	1.95492	0.547034	Arfgef2	protein_coding	ADP-ribosylation factor guanine nucleotide-exchange factor 2 (brefeldin A-inhibited) [Source:MGI Symbol;Acc:MGI:2139354]
ENSMUSG00000010406	-1.555	2.65706e-12	4.6938	3.09694	Mrpl52	protein_coding	mitochondrial ribosomal protein L52 [Source:MGI Symbol;Acc:MGI:1916086]
ENSMUSG00000020189	-1.60038	2.65706e-12	3.6721	2.04663	Osbpl8	protein_coding	oxysterol binding protein-like 8 [Source:MGI Symbol;Acc:MGI:2443807]
ENSMUSG00000028949	-1.45153	2.66031e-12	3.77892	2.30134	Smarcd3	protein_coding	SWI/SNF related, matrix associated, actin dependent regulator of chromatin, subfamily d, member 3 [Source:MGI Symbol;Acc:MGI:1914243]
ENSMUSG00000028431	-0.8541	2.69481e-12	1.35596	0.484809	Ikbkap	protein_coding	inhibitor of kappa light polypeptide enhancer in B cells, kinase complex-associated protein [Source:MGI Symbol;Acc:MGI:1914544]
ENSMUSG00000036052	-1.23122	2.75794e-12	2.74282	1.48996	Dnajb5	protein_coding	DnaJ heat shock protein family (Hsp40) member B5 [Source:MGI Symbol;Acc:MGI:1930018]
ENSMUSG00000006095	-1.08332	2.79265e-12	2.42969	1.32765	Tbcb	protein_coding	tubulin folding cofactor B [Source:MGI Symbol;Acc:MGI:1913661]
ENSMUSG00000019828	-1.23489	2.79265e-12	2.2955	1.04171	Grm1	protein_coding	glutamate receptor, metabotropic 1 [Source:MGI Symbol;Acc:MGI:1351338]
ENSMUSG00000010911	-1.45453	2.7961e-12	3.73557	2.25463	Apip	protein_coding	APAF1 interacting protein [Source:MGI Symbol;Acc:MGI:1926788]
ENSMUSG00000044224	-0.84795	2.87652e-12	3.74317	2.86977	Dnajc21	protein_coding	DnaJ heat shock protein family (Hsp40) member C21 [Source:MGI Symbol;Acc:MGI:1925371]
ENSMUSG00000028917	-2.17674	3.02558e-12	4.10469	1.90344	Plekhm2	protein_coding	pleckstrin homology domain containing, family M (with RUN domain) member 2 [Source:MGI Symbol;Acc:MGI:1916832]
ENSMUSG00000048271	-1.09673	3.05078e-12	2.21189	1.09243	Rbm33	protein_coding	RNA binding motif protein 33 [Source:MGI Symbol;Acc:MGI:1919670]
ENSMUSG00000030879	-1.67448	3.07054e-12	3.69074	1.99154	Mrpl17	protein_coding	mitochondrial ribosomal protein L17 [Source:MGI Symbol;Acc:MGI:1351608]
ENSMUSG00000040086	-1.2489	3.07523e-12	3.21583	1.94433	Tnni3k	protein_coding	TNNI3 interacting kinase [Source:MGI Symbol;Acc:MGI:2443276]
ENSMUSG00000060032	-1.28664	3.07523e-12	3.65167	2.33916	H2afj	protein_coding	H2A histone family, member J [Source:MGI Symbol;Acc:MGI:3606192]
ENSMUSG00000022724	-1.35522	3.07523e-12	2.62273	1.24813	Riox2	protein_coding	ribosomal oxygenase 2 [Source:MGI Symbol;Acc:MGI:1914264]
ENSMUSG00000026858	-1.28338	3.07725e-12	2.33075	1.02892	Miga2	protein_coding	mitoguardin 2 [Source:MGI Symbol;Acc:MGI:1922035]
ENSMUSG00000078881	-0.741541	3.1136e-12	1.44203	0.681164	Gm14434	protein_coding	predicted gene 14434 [Source:MGI Symbol;Acc:MGI:3702417]
ENSMUSG00000046794	-0.630062	3.14521e-12	0.768115	0.104791	Ppp1r3b	protein_coding	protein phosphatase 1, regulatory (inhibitor) subunit 3B [Source:MGI Symbol;Acc:MGI:2177268]
ENSMUSG00000032396	-1.52864	3.16452e-12	2.39961	0.849041	Dis3l	protein_coding	DIS3 like exosome 3'-5' exoribonuclease [Source:MGI Symbol;Acc:MGI:2143272]
ENSMUSG00000066568	-1.1811	3.19237e-12	2.57244	1.37217	Lsm14a	protein_coding	LSM14A mRNA processing body assembly factor [Source:MGI Symbol;Acc:MGI:1914320]
ENSMUSG00000014470	-0.799649	3.22595e-12	2.03417	1.21815	Rnf166	protein_coding	ring finger protein 166 [Source:MGI Symbol;Acc:MGI:1915968]
ENSMUSG00000005687	-1.36089	3.22595e-12	2.96564	1.58451	Bcas2	protein_coding	breast carcinoma amplified sequence 2 [Source:MGI Symbol;Acc:MGI:1915433]
ENSMUSG00000025499	-2.5668	3.22595e-12	5.02979	2.43304	Hras	protein_coding	Harvey rat sarcoma virus oncogene [Source:MGI Symbol;Acc:MGI:96224]
ENSMUSG00000024384	-1.31006	3.30044e-12	1.94452	0.612041	Iws1	protein_coding	IWS1, SUPT6 interacting protein [Source:MGI Symbol;Acc:MGI:1920723]
ENSMUSG00000038324	-1.87151	3.31056e-12	3.32037	1.4277	Trpc4ap	protein_coding	transient receptor potential cation channel, subfamily C, member 4 associated protein [Source:MGI Symbol;Acc:MGI:1930751]
ENSMUSG00000022094	-1.104	3.33871e-12	2.56374	1.44075	Slc39a14	protein_coding	solute carrier family 39 (zinc transporter), member 14 [Source:MGI Symbol;Acc:MGI:2384851]
ENSMUSG00000038807	-0.839615	3.34854e-12	2.08959	1.23355	Rap1gap2	protein_coding	RAP1 GTPase activating protein 2 [Source:MGI Symbol;Acc:MGI:3028623]
ENSMUSG00000024513	-0.98146	3.37998e-12	2.86307	1.86136	Mbd2	protein_coding	methyl-CpG binding domain protein 2 [Source:MGI Symbol;Acc:MGI:1333813]
ENSMUSG00000027601	-1.40822	3.43398e-12	2.48535	1.05907	Mtfr1	protein_coding	mitochondrial fission regulator 1 [Source:MGI Symbol;Acc:MGI:1914722]
ENSMUSG00000037887	-0.590663	3.50351e-12	1.99384	1.38697	Dusp8	protein_coding	dual specificity phosphatase 8 [Source:MGI Symbol;Acc:MGI:106626]
ENSMUSG00000015846	-1.00894	3.50351e-12	1.85208	0.827671	Rxra	protein_coding	retinoid X receptor alpha [Source:MGI Symbol;Acc:MGI:98214]
ENSMUSG00000061111	-1.39036	3.50351e-12	2.5081	1.10156	Mcrip1	protein_coding	MAPK regulated corepressor interacting protein 1 [Source:MGI Symbol;Acc:MGI:2384752]
ENSMUSG00000027667	-1.43461	3.50351e-12	2.19526	0.735911	Zfp639	protein_coding	zinc finger protein 639 [Source:MGI Symbol;Acc:MGI:1915028]
ENSMUSG00000030061	-1.68759	3.5515e-12	3.6994	1.98698	Uba3	protein_coding	ubiquitin-like modifier activating enzyme 3 [Source:MGI Symbol;Acc:MGI:1341217]
ENSMUSG00000068391	-1.14909	3.56115e-12	3.57936	2.40501	Chrac1	protein_coding	chromatin accessibility complex 1 [Source:MGI Symbol;Acc:MGI:2135796]
ENSMUSG00000031232	-1.6616	3.58588e-12	3.1422	1.45751	Magt1	protein_coding	magnesium transporter 1 [Source:MGI Symbol;Acc:MGI:1914325]
ENSMUSG00000025616	-0.985598	3.61571e-12	3.76444	2.75408	Usp16	protein_coding	ubiquitin specific peptidase 16 [Source:MGI Symbol;Acc:MGI:1921362]
ENSMUSG00000030304	-1.37576	3.78911e-12	2.48302	1.08705	Ergic2	protein_coding	ERGIC and golgi 2 [Source:MGI Symbol;Acc:MGI:1914706]
ENSMUSG00000038302	-0.721002	3.7913e-12	2.22407	1.48718	Afg1l	protein_coding	AFG1 like ATPase [Source:MGI Symbol;Acc:MGI:2148801]
ENSMUSG00000035992	-1.48128	3.7913e-12	3.15637	1.65397	Fnip1	protein_coding	folliculin interacting protein 1 [Source:MGI Symbol;Acc:MGI:2444668]
ENSMUSG00000024735	-2.03037	3.7913e-12	4.56475	2.50411	Prpf19	protein_coding	pre-mRNA processing factor 19 [Source:MGI Symbol;Acc:MGI:106247]
ENSMUSG00000060678	-1.02792	3.81598e-12	1.5153	0.466092	Hist1h4c	protein_coding	histone cluster 1, H4c [Source:MGI Symbol;Acc:MGI:2448421]
ENSMUSG00000052837	-0.69109	3.81623e-12	2.61858	1.90924	Junb	protein_coding	jun B proto-oncogene [Source:MGI Symbol;Acc:MGI:96647]
ENSMUSG00000056770	-0.937298	3.82971e-12	3.66225	2.69795	Setd3	protein_coding	SET domain containing 3 [Source:MGI Symbol;Acc:MGI:1289184]
ENSMUSG00000031647	-0.304268	3.86228e-12	1.03456	0.715469	Mfap3l	protein_coding	microfibrillar-associated protein 3-like [Source:MGI Symbol;Acc:MGI:1918556]
ENSMUSG00000037531	-1.13763	3.86228e-12	2.55684	1.40058	Mrpl47	protein_coding	mitochondrial ribosomal protein L47 [Source:MGI Symbol;Acc:MGI:1921850]
ENSMUSG00000019977	-1.88393	3.86228e-12	3.94409	2.0344	Hbs1l	protein_coding	Hbs1-like (S. cerevisiae) [Source:MGI Symbol;Acc:MGI:1891704]
ENSMUSG00000030603	-1.87584	3.8984e-12	3.51392	1.61776	Psmc4	protein_coding	proteasome (prosome, macropain) 26S subunit, ATPase, 4 [Source:MGI Symbol;Acc:MGI:1346093]
ENSMUSG00000044477	-0.828894	3.92394e-12	2.70019	1.85233	Zfand3	protein_coding	zinc finger, AN1-type domain 3 [Source:MGI Symbol;Acc:MGI:1096572]
ENSMUSG00000038240	-0.934163	4.02254e-12	1.95564	1.00539	Pdss2	protein_coding	prenyl (solanesyl) diphosphate synthase, subunit 2 [Source:MGI Symbol;Acc:MGI:1918615]
ENSMUSG00000020067	-1.61419	4.02254e-12	3.25301	1.61795	Mypn	protein_coding	myopalladin [Source:MGI Symbol;Acc:MGI:1916052]
ENSMUSG00000035776	-2.00388	4.03262e-12	4.04284	2.01301	Cd99l2	protein_coding	CD99 antigen-like 2 [Source:MGI Symbol;Acc:MGI:2177151]
ENSMUSG00000039910	-1.07398	4.0961e-12	2.51001	1.41397	Cited2	protein_coding	Cbp/p300-interacting transactivator, with Glu/Asp-rich carboxy-terminal domain, 2 [Source:MGI Symbol;Acc:MGI:1306784]
ENSMUSG00000069266	-1.16733	4.10282e-12	1.71547	0.527403	Hist1h4b	protein_coding	histone cluster 1, H4b [Source:MGI Symbol;Acc:MGI:2448420]
ENSMUSG00000015943	-1.36464	4.17429e-12	3.05468	1.66623	Bola1	protein_coding	bolA-like 1 (E. coli) [Source:MGI Symbol;Acc:MGI:1916418]
ENSMUSG00000029238	-1.51315	4.18549e-12	2.53294	0.998037	Clock	protein_coding	circadian locomotor output cycles kaput [Source:MGI Symbol;Acc:MGI:99698]
ENSMUSG00000032050	-2.10058	4.23444e-12	5.96649	3.81472	Rdx	protein_coding	radixin [Source:MGI Symbol;Acc:MGI:97887]
ENSMUSG00000069117	-0.877852	4.23694e-12	3.09089	2.18916	Gm10260	protein_coding	predicted gene 10260 [Source:MGI Symbol;Acc:MGI:3642298]
ENSMUSG00000033735	-1.15933	4.23694e-12	3.09779	1.9171	Spr	protein_coding	sepiapterin reductase [Source:MGI Symbol;Acc:MGI:103078]
ENSMUSG00000028229	-1.58662	4.25336e-12	3.27952	1.67146	Rmdn1	protein_coding	regulator of microtubule dynamics 1 [Source:MGI Symbol;Acc:MGI:1913552]
ENSMUSG00000040225	-2.12449	4.25409e-12	4.03955	1.88908	Prrc2c	protein_coding	proline-rich coiled-coil 2C [Source:MGI Symbol;Acc:MGI:1913754]
ENSMUSG00000060639	-0.955448	4.28434e-12	1.4597	0.484459	Hist1h4i	protein_coding	histone cluster 1, H4i [Source:MGI Symbol;Acc:MGI:2448432]
ENSMUSG00000024780	-1.55303	4.28637e-12	5.03551	3.44455	Cdc37l1	protein_coding	cell division cycle 37-like 1 [Source:MGI Symbol;Acc:MGI:1914322]
ENSMUSG00000026374	-1.47731	4.33226e-12	3.59807	2.09621	Tsn	protein_coding	translin [Source:MGI Symbol;Acc:MGI:109263]
ENSMUSG00000035133	-1.5777	4.34583e-12	5.06156	3.44585	Arhgap5	protein_coding	Rho GTPase activating protein 5 [Source:MGI Symbol;Acc:MGI:1332637]
ENSMUSG00000015843	-1.94753	4.36538e-12	3.61907	1.64684	Rxrg	protein_coding	retinoid X receptor gamma [Source:MGI Symbol;Acc:MGI:98216]
ENSMUSG00000028394	-0.886211	4.36775e-12	1.51808	0.61633	Pole3	protein_coding	polymerase (DNA directed), epsilon 3 (p17 subunit) [Source:MGI Symbol;Acc:MGI:1933378]
ENSMUSG00000078440	-0.842409	4.47313e-12	1.34856	0.492534	Dohh	protein_coding	deoxyhypusine hydroxylase/monooxygenase [Source:MGI Symbol;Acc:MGI:1915964]
ENSMUSG00000021967	-1.18884	4.53162e-12	3.24147	2.0302	Mrpl57	protein_coding	mitochondrial ribosomal protein L57 [Source:MGI Symbol;Acc:MGI:1915090]
ENSMUSG00000040242	-1.93375	4.53282e-12	5.43923	3.46525	Fgfr1op2	protein_coding	FGFR1 oncogene partner 2 [Source:MGI Symbol;Acc:MGI:1914779]
ENSMUSG00000045996	-2.34964	4.53976e-12	5.10794	2.72803	Polr2k	protein_coding	polymerase (RNA) II (DNA directed) polypeptide K [Source:MGI Symbol;Acc:MGI:102725]
ENSMUSG00000014226	-1.43366	4.54713e-12	4.55375	3.08306	Cacybp	protein_coding	calcyclin binding protein [Source:MGI Symbol;Acc:MGI:1270839]
ENSMUSG00000032525	-0.656103	4.56156e-12	1.42593	0.751448	Nktr	protein_coding	natural killer tumor recognition sequence [Source:MGI Symbol;Acc:MGI:97346]
ENSMUSG00000030733	-1.73207	4.62253e-12	3.14841	1.39172	Sh2b1	protein_coding	SH2B adaptor protein 1 [Source:MGI Symbol;Acc:MGI:1201407]
ENSMUSG00000092137	-1.43538	4.66324e-12	3.84816	2.387	Gcom1	protein_coding	GRINL1A complex locus [Source:MGI Symbol;Acc:MGI:5141967]
ENSMUSG00000020954	-1.72791	4.66324e-12	5.30605	3.53966	Strn3	protein_coding	striatin, calmodulin binding protein 3 [Source:MGI Symbol;Acc:MGI:2151064]
ENSMUSG00000055912	-1.29709	4.72163e-12	1.83534	0.520457	Tmem150a	protein_coding	transmembrane protein 150A [Source:MGI Symbol;Acc:MGI:2385244]
ENSMUSG00000071072	-1.81874	4.72163e-12	4.87071	3.0131	Ptges3	protein_coding	prostaglandin E synthase 3 [Source:MGI Symbol;Acc:MGI:1929282]
ENSMUSG00000053110	-1.06941	4.72271e-12	1.79166	0.70265	Yap1	protein_coding	yes-associated protein 1 [Source:MGI Symbol;Acc:MGI:103262]
ENSMUSG00000001380	-0.81935	4.79933e-12	1.60346	0.766694	Hars	protein_coding	histidyl-tRNA synthetase [Source:MGI Symbol;Acc:MGI:108087]
ENSMUSG00000072235	-1.29672	4.79933e-12	2.48844	1.17352	Tuba1a	protein_coding	tubulin, alpha 1A [Source:MGI Symbol;Acc:MGI:98869]
ENSMUSG00000028057	-1.08313	4.81358e-12	2.34087	1.23874	Rit1	protein_coding	Ras-like without CAAX 1 [Source:MGI Symbol;Acc:MGI:108053]
ENSMUSG00000035765	-1.03421	4.83246e-12	3.27354	2.21415	Dym	protein_coding	dymeclin [Source:MGI Symbol;Acc:MGI:1918480]
ENSMUSG00000060904	-1.54647	5.17508e-12	3.69223	2.12006	Arl1	protein_coding	ADP-ribosylation factor-like 1 [Source:MGI Symbol;Acc:MGI:99436]
ENSMUSG00000074211	-1.33545	5.22419e-12	2.41123	1.05967	Sdhaf1	protein_coding	succinate dehydrogenase complex assembly factor 1 [Source:MGI Symbol;Acc:MGI:1915582]
ENSMUSG00000052397	-1.30741	5.22755e-12	2.4609	1.13608	Ezr	protein_coding	ezrin [Source:MGI Symbol;Acc:MGI:98931]
ENSMUSG00000084883	-0.901453	5.24024e-12	1.819	0.903185	Ccdc85c	protein_coding	coiled-coil domain containing 85C [Source:MGI Symbol;Acc:MGI:3644008]
ENSMUSG00000029642	-1.50908	5.24024e-12	3.86373	2.32741	Polr1d	protein_coding	polymerase (RNA) I polypeptide D [Source:MGI Symbol;Acc:MGI:108403]
ENSMUSG00000039000	-0.423759	5.38928e-12	1.72905	1.29075	Ube3c	protein_coding	ubiquitin protein ligase E3C [Source:MGI Symbol;Acc:MGI:2140998]
ENSMUSG00000037351	-1.04273	5.51316e-12	2.22909	1.1711	Actr1b	protein_coding	ARP1 actin-related protein 1B, centractin beta [Source:MGI Symbol;Acc:MGI:1917446]
ENSMUSG00000035754	-1.0462	5.55043e-12	2.46259	1.39879	Wdr18	protein_coding	WD repeat domain 18 [Source:MGI Symbol;Acc:MGI:2158400]
ENSMUSG00000031137	-1.7933	5.66012e-12	2.909	1.09148	Fgf13	protein_coding	fibroblast growth factor 13 [Source:MGI Symbol;Acc:MGI:109178]
ENSMUSG00000030611	-0.838581	5.67475e-12	1.99426	1.13879	Mrps11	protein_coding	mitochondrial ribosomal protein S11 [Source:MGI Symbol;Acc:MGI:1915244]
ENSMUSG00000027465	-0.811755	5.68167e-12	1.3788	0.550869	Tbc1d20	protein_coding	TBC1 domain family, member 20 [Source:MGI Symbol;Acc:MGI:1914481]
ENSMUSG00000019132	-1.70749	5.77992e-12	4.57556	2.83277	BC005537	protein_coding	cDNA sequence BC005537 [Source:MGI Symbol;Acc:MGI:2441726]
ENSMUSG00000047747	-0.766613	5.90285e-12	1.50224	0.719118	Rnf150	protein_coding	ring finger protein 150 [Source:MGI Symbol;Acc:MGI:2443860]
ENSMUSG00000058351	-1.88866	5.90285e-12	4.05785	2.14299	Smim4	protein_coding	small integral membrane protein 4 [Source:MGI Symbol;Acc:MGI:1913737]
ENSMUSG00000024870	-0.923532	5.95707e-12	3.34142	2.39322	Rab1b	protein_coding	RAB1B, member RAS oncogene family [Source:MGI Symbol;Acc:MGI:1923558]
ENSMUSG00000017421	-1.30421	5.97776e-12	2.89474	1.5691	Zfp207	protein_coding	zinc finger protein 207 [Source:MGI Symbol;Acc:MGI:1340045]
ENSMUSG00000036644	-0.829492	5.99473e-12	1.41809	0.565808	Tbc1d9b	protein_coding	TBC1 domain family, member 9B [Source:MGI Symbol;Acc:MGI:1924045]
ENSMUSG00000066232	-0.84912	6.14075e-12	3.5105	2.63397	Ipo7	protein_coding	importin 7 [Source:MGI Symbol;Acc:MGI:2152414]
ENSMUSG00000026914	-1.08612	6.44286e-12	2.59427	1.48901	Psmd14	protein_coding	proteasome (prosome, macropain) 26S subunit, non-ATPase, 14 [Source:MGI Symbol;Acc:MGI:1913284]
ENSMUSG00000030753	-1.44743	6.61029e-12	4.03993	2.56089	Thap12	protein_coding	THAP domain containing 12 [Source:MGI Symbol;Acc:MGI:1920231]
ENSMUSG00000042354	-0.897539	6.64773e-12	1.64837	0.73419	Gnl3	protein_coding	guanine nucleotide binding protein-like 3 (nucleolar) [Source:MGI Symbol;Acc:MGI:1353651]
ENSMUSG00000020611	-0.973961	6.67632e-12	1.30494	0.314932	Gna13	protein_coding	guanine nucleotide binding protein, alpha 13 [Source:MGI Symbol;Acc:MGI:95768]
ENSMUSG00000002319	-0.586987	6.77737e-12	1.20755	0.606584	Ipo4	protein_coding	importin 4 [Source:MGI Symbol;Acc:MGI:1923001]
ENSMUSG00000033565	-2.21561	6.77771e-12	3.62642	1.38836	Rbfox2	protein_coding	RNA binding protein, fox-1 homolog (C. elegans) 2 [Source:MGI Symbol;Acc:MGI:1933973]
ENSMUSG00000007338	-0.870917	6.80315e-12	1.99192	1.10434	Mrpl49	protein_coding	mitochondrial ribosomal protein L49 [Source:MGI Symbol;Acc:MGI:108180]
ENSMUSG00000030662	-0.896037	6.80809e-12	3.80713	2.87946	Ipo5	protein_coding	importin 5 [Source:MGI Symbol;Acc:MGI:1917822]
ENSMUSG00000022024	-0.989842	7.06446e-12	2.78505	1.77592	Sugt1	protein_coding	SGT1, suppressor of G2 allele of SKP1 (S. cerevisiae) [Source:MGI Symbol;Acc:MGI:1915205]
ENSMUSG00000031826	-1.03091	7.17574e-12	2.6746	1.62351	Usp10	protein_coding	ubiquitin specific peptidase 10 [Source:MGI Symbol;Acc:MGI:894652]
ENSMUSG00000003464	-1.37489	7.17574e-12	4.1855	2.77583	Pex19	protein_coding	peroxisomal biogenesis factor 19 [Source:MGI Symbol;Acc:MGI:1334458]
ENSMUSG00000055296	-1.10642	7.20511e-12	2.31049	1.18594	Tmem245	protein_coding	transmembrane protein 245 [Source:MGI Symbol;Acc:MGI:2445107]
ENSMUSG00000020993	-1.19782	7.276e-12	2.5606	1.34505	Trappc6b	protein_coding	trafficking protein particle complex 6B [Source:MGI Symbol;Acc:MGI:1925482]
ENSMUSG00000020089	-1.26338	7.31098e-12	2.62055	1.3386	Ppa1	protein_coding	pyrophosphatase (inorganic) 1 [Source:MGI Symbol;Acc:MGI:97831]
ENSMUSG00000059278	-1.26324	7.41828e-12	3.2877	2.00207	Naa38	protein_coding	N(alpha)-acetyltransferase 38, NatC auxiliary subunit [Source:MGI Symbol;Acc:MGI:1925554]
ENSMUSG00000038520	-0.869676	7.43325e-12	1.28629	0.401853	Tbc1d17	protein_coding	TBC1 domain family, member 17 [Source:MGI Symbol;Acc:MGI:2449973]
ENSMUSG00000036323	-0.841907	7.46575e-12	2.34597	1.48585	Srp72	protein_coding	signal recognition particle 72 [Source:MGI Symbol;Acc:MGI:1333795]
ENSMUSG00000031983	-0.789984	7.5045e-12	1.57235	0.767988	2310022B05Rik	protein_coding	RIKEN cDNA 2310022B05 gene [Source:MGI Symbol;Acc:MGI:1916801]
ENSMUSG00000034903	-2.38701	7.77137e-12	4.233	1.81733	Cobll1	protein_coding	Cobl-like 1 [Source:MGI Symbol;Acc:MGI:2442894]
ENSMUSG00000025764	-1.95124	7.79206e-12	2.96205	0.986024	Jade1	protein_coding	jade family PHD finger 1 [Source:MGI Symbol;Acc:MGI:1925835]
ENSMUSG00000021936	-0.892023	7.79549e-12	1.51526	0.606432	Mapk8	protein_coding	mitogen-activated protein kinase 8 [Source:MGI Symbol;Acc:MGI:1346861]
ENSMUSG00000028402	-2.03641	7.93297e-12	3.9581	1.89571	Mpdz	protein_coding	multiple PDZ domain protein [Source:MGI Symbol;Acc:MGI:1343489]
ENSMUSG00000002833	-1.27849	8.05473e-12	2.4321	1.13107	Hdgfl2	protein_coding	HDGF like 2 [Source:MGI Symbol;Acc:MGI:1194492]
ENSMUSG00000023353	-0.398901	8.05996e-12	1.17163	0.759771	Agap3	protein_coding	ArfGAP with GTPase domain, ankyrin repeat and PH domain 3 [Source:MGI Symbol;Acc:MGI:2183446]
ENSMUSG00000078317	-0.764464	8.05996e-12	0.91687	0.137658	F8a	protein_coding	factor 8-associated gene A [Source:MGI Symbol;Acc:MGI:95474]
ENSMUSG00000038014	-1.17916	8.05996e-12	3.13649	1.93573	Fam120a	protein_coding	family with sequence similarity 120, member A [Source:MGI Symbol;Acc:MGI:2446163]
ENSMUSG00000030249	-2.19565	8.07055e-12	5.26965	3.03806	Abcc9	protein_coding	ATP-binding cassette, sub-family C (CFTR/MRP), member 9 [Source:MGI Symbol;Acc:MGI:1352630]
ENSMUSG00000035173	-1.27844	8.13673e-12	2.14592	0.849756	Ccdc186	protein_coding	coiled-coil domain containing 186 [Source:MGI Symbol;Acc:MGI:2445022]
ENSMUSG00000072501	-1.50635	8.13673e-12	3.41363	1.88474	Phf20l1	protein_coding	PHD finger protein 20-like 1 [Source:MGI Symbol;Acc:MGI:2444412]
ENSMUSG00000032249	-1.15101	8.15615e-12	2.75234	1.58041	Anp32a	protein_coding	acidic (leucine-rich) nuclear phosphoprotein 32 family, member A [Source:MGI Symbol;Acc:MGI:108447]
ENSMUSG00000057342	-1.35538	8.15615e-12	2.22473	0.84947	Sphk2	protein_coding	sphingosine kinase 2 [Source:MGI Symbol;Acc:MGI:1861380]
ENSMUSG00000022174	-1.1053	8.26837e-12	2.74178	1.61781	Dad1	protein_coding	defender against cell death 1 [Source:MGI Symbol;Acc:MGI:101912]
ENSMUSG00000028955	-0.929304	8.37677e-12	2.28049	1.33452	Vamp3	protein_coding	vesicle-associated membrane protein 3 [Source:MGI Symbol;Acc:MGI:1321389]
ENSMUSG00000037720	-1.47648	8.37677e-12	2.43023	0.930083	Tmem33	protein_coding	transmembrane protein 33 [Source:MGI Symbol;Acc:MGI:1915128]
ENSMUSG00000023025	-1.65574	8.41541e-12	3.43113	1.75159	Larp4	protein_coding	La ribonucleoprotein domain family, member 4 [Source:MGI Symbol;Acc:MGI:2443114]
ENSMUSG00000039976	-0.99751	8.45553e-12	1.96487	0.952735	Tbc1d16	protein_coding	TBC1 domain family, member 16 [Source:MGI Symbol;Acc:MGI:2652878]
ENSMUSG00000018740	-1.23094	8.45553e-12	4.08191	2.82283	Slc25a35	protein_coding	solute carrier family 25, member 35 [Source:MGI Symbol;Acc:MGI:1919248]
ENSMUSG00000025240	-0.792381	8.48825e-12	1.37733	0.565461	Sacm1l	protein_coding	SAC1 suppressor of actin mutations 1-like (yeast) [Source:MGI Symbol;Acc:MGI:1933169]
ENSMUSG00000021027	-1.73796	8.48825e-12	2.97875	1.21903	Ralgapa1	protein_coding	Ral GTPase activating protein, alpha subunit 1 [Source:MGI Symbol;Acc:MGI:1931050]
ENSMUSG00000006262	-0.942447	8.599e-12	2.25706	1.29668	Mob1b	protein_coding	MOB kinase activator 1B [Source:MGI Symbol;Acc:MGI:1915723]
ENSMUSG00000041741	-1.59398	8.61909e-12	3.48462	1.86773	Pde3a	protein_coding	phosphodiesterase 3A, cGMP inhibited [Source:MGI Symbol;Acc:MGI:1860764]
ENSMUSG00000033610	-1.66316	8.68581e-12	3.47705	1.79095	Pank1	protein_coding	pantothenate kinase 1 [Source:MGI Symbol;Acc:MGI:1922985]
ENSMUSG00000050812	-1.7924	8.68581e-12	4.56926	2.7437	AI314180	protein_coding	expressed sequence AI314180 [Source:MGI Symbol;Acc:MGI:2140220]
ENSMUSG00000071648	-0.845937	8.70905e-12	2.04096	1.17844	Rom1	protein_coding	rod outer segment membrane protein 1 [Source:MGI Symbol;Acc:MGI:97998]
ENSMUSG00000036580	-1.1787	8.72311e-12	2.39396	1.19203	Spg20	protein_coding	spastic paraplegia 20, spartin (Troyer syndrome) homolog (human) [Source:MGI Symbol;Acc:MGI:2139806]
ENSMUSG00000028413	-0.896078	8.79425e-12	2.20692	1.29404	B4galt1	protein_coding	UDP-Gal:betaGlcNAc beta 1,4- galactosyltransferase, polypeptide 1 [Source:MGI Symbol;Acc:MGI:95705]
ENSMUSG00000041765	-0.985505	8.87303e-12	1.50264	0.500429	Ubac2	protein_coding	ubiquitin associated domain containing 2 [Source:MGI Symbol;Acc:MGI:1916139]
ENSMUSG00000038844	-1.76644	8.87303e-12	3.88081	2.08913	Kif16b	protein_coding	kinesin family member 16B [Source:MGI Symbol;Acc:MGI:1098240]
ENSMUSG00000027309	-1.02881	8.89928e-12	1.94501	0.896747	4930402H24Rik	protein_coding	RIKEN cDNA 4930402H24 gene [Source:MGI Symbol;Acc:MGI:1923029]
ENSMUSG00000023921	-1.50992	8.95801e-12	4.20407	2.66305	Mut	protein_coding	methylmalonyl-Coenzyme A mutase [Source:MGI Symbol;Acc:MGI:97239]
ENSMUSG00000056501	-0.832953	9.09501e-12	1.86469	1.01775	Cebpb	protein_coding	CCAAT/enhancer binding protein (C/EBP), beta [Source:MGI Symbol;Acc:MGI:88373]
ENSMUSG00000062352	-1.66661	9.09501e-12	3.15463	1.46657	Itgb1bp1	protein_coding	integrin beta 1 binding protein 1 [Source:MGI Symbol;Acc:MGI:1306802]
ENSMUSG00000031533	-1.02616	9.19498e-12	2.37373	1.3293	Mrps31	protein_coding	mitochondrial ribosomal protein S31 [Source:MGI Symbol;Acc:MGI:1913153]
ENSMUSG00000040740	-1.08875	9.19498e-12	2.70251	1.59493	Slc25a34	protein_coding	solute carrier family 25, member 34 [Source:MGI Symbol;Acc:MGI:2686215]
ENSMUSG00000074093	-1.25558	9.19498e-12	3.05518	1.77877	Svip	protein_coding	small VCP/p97-interacting protein [Source:MGI Symbol;Acc:MGI:1922994]
ENSMUSG00000001134	-0.501171	9.20432e-12	2.21186	1.69528	Uxt	protein_coding	ubiquitously expressed transcript [Source:MGI Symbol;Acc:MGI:1277988]
ENSMUSG00000029634	-1.20916	9.2872e-12	2.60513	1.37407	Rnf6	protein_coding	ring finger protein (C3H2C3 type) 6 [Source:MGI Symbol;Acc:MGI:1921382]
ENSMUSG00000008859	-1.49447	9.42074e-12	3.59165	2.07324	Rala	protein_coding	v-ral simian leukemia viral oncogene A (ras related) [Source:MGI Symbol;Acc:MGI:1927243]
ENSMUSG00000001774	-0.715224	9.43235e-12	2.237	1.50426	Chordc1	protein_coding	cysteine and histidine-rich domain (CHORD)-containing, zinc-binding protein 1 [Source:MGI Symbol;Acc:MGI:1914167]
ENSMUSG00000054619	-1.02723	9.43235e-12	1.66622	0.622245	Mettl7a1	protein_coding	methyltransferase like 7A1 [Source:MGI Symbol;Acc:MGI:1916523]
ENSMUSG00000032126	-1.34914	9.46405e-12	2.03712	0.669633	Hmbs	protein_coding	hydroxymethylbilane synthase [Source:MGI Symbol;Acc:MGI:96112]
ENSMUSG00000045886	-1.35058	9.46405e-12	4.09966	2.71946	Gm9803	protein_coding	predicted gene 9803 [Source:MGI Symbol;Acc:MGI:3704359]
ENSMUSG00000030216	-1.40048	9.46405e-12	3.02988	1.60979	Wbp11	protein_coding	WW domain binding protein 11 [Source:MGI Symbol;Acc:MGI:1891823]
ENSMUSG00000040843	-0.87849	9.61352e-12	2.1646	1.27018	Tiprl	protein_coding	TIP41, TOR signalling pathway regulator-like (S. cerevisiae) [Source:MGI Symbol;Acc:MGI:1915087]
ENSMUSG00000049124	-1.02401	9.61352e-12	1.55018	0.511519	Gm8186	protein_coding	predicted gene 8186 [Source:MGI Symbol;Acc:MGI:3643110]
ENSMUSG00000020935	-0.669815	9.7178e-12	1.55011	0.865963	Dcakd	protein_coding	dephospho-CoA kinase domain containing [Source:MGI Symbol;Acc:MGI:1915337]
ENSMUSG00000025134	-0.347064	9.978e-12	1.17713	0.817639	Alyref	protein_coding	Aly/REF export factor [Source:MGI Symbol;Acc:MGI:1341044]
ENSMUSG00000058756	-1.18334	9.99428e-12	2.98038	1.77689	Thra	protein_coding	thyroid hormone receptor alpha [Source:MGI Symbol;Acc:MGI:98742]
ENSMUSG00000042155	-0.970283	1.02562e-11	1.98632	0.999805	Klhl23	protein_coding	kelch-like 23 [Source:MGI Symbol;Acc:MGI:2683536]
ENSMUSG00000045438	-1.34887	1.02728e-11	3.69135	2.31649	Cox19	protein_coding	cytochrome c oxidase assembly protein 19 [Source:MGI Symbol;Acc:MGI:1915283]
ENSMUSG00000031485	-0.719117	1.02873e-11	3.00371	2.26373	Plpbp	protein_coding	pyridoxal phosphate binding protein [Source:MGI Symbol;Acc:MGI:1891207]
ENSMUSG00000024309	-1.92596	1.02873e-11	3.33261	1.38282	Pfdn6	protein_coding	prefoldin subunit 6 [Source:MGI Symbol;Acc:MGI:95908]
ENSMUSG00000037519	-1.43071	1.03238e-11	2.65955	1.21098	Ppfia1	protein_coding	protein tyrosine phosphatase, receptor type, f polypeptide (PTPRF), interacting protein (liprin), alpha 1 [Source:MGI Symbol;Acc:MGI:1924750]
ENSMUSG00000040648	-2.12459	1.03306e-11	4.60191	2.4486	Ppip5k2	protein_coding	diphosphoinositol pentakisphosphate kinase 2 [Source:MGI Symbol;Acc:MGI:2142810]
ENSMUSG00000025894	-1.02032	1.03871e-11	2.18699	1.15023	Aasdhppt	protein_coding	aminoadipate-semialdehyde dehydrogenase-phosphopantetheinyl transferase [Source:MGI Symbol;Acc:MGI:1914868]
ENSMUSG00000028797	-1.54503	1.03871e-11	2.54165	0.978712	Tmem234	protein_coding	transmembrane protein 234 [Source:MGI Symbol;Acc:MGI:1924049]
ENSMUSG00000056234	-1.49173	1.04723e-11	2.58836	1.07883	Ncoa4	protein_coding	nuclear receptor coactivator 4 [Source:MGI Symbol;Acc:MGI:1350932]
ENSMUSG00000029106	-1.78289	1.07098e-11	3.66773	1.85951	Add1	protein_coding	adducin 1 (alpha) [Source:MGI Symbol;Acc:MGI:87918]
ENSMUSG00000027371	-0.883357	1.09741e-11	2.55421	1.653	Fahd2a	protein_coding	fumarylacetoacetate hydrolase domain containing 2A [Source:MGI Symbol;Acc:MGI:1915376]
ENSMUSG00000042042	-0.773909	1.13199e-11	1.22279	0.428421	Csgalnact2	protein_coding	chondroitin sulfate N-acetylgalactosaminyltransferase 2 [Source:MGI Symbol;Acc:MGI:1926002]
ENSMUSG00000032869	-0.613492	1.13594e-11	1.25439	0.623801	Psmf1	protein_coding	proteasome (prosome, macropain) inhibitor subunit 1 [Source:MGI Symbol;Acc:MGI:1346072]
ENSMUSG00000021139	-1.30383	1.1397e-11	2.87401	1.54947	Gm20498	protein_coding	predicted gene 20498 [Source:MGI Symbol;Acc:MGI:5141963]
ENSMUSG00000034659	-1.2211	1.15715e-11	3.45442	2.20968	Tmem109	protein_coding	transmembrane protein 109 [Source:MGI Symbol;Acc:MGI:1915789]
ENSMUSG00000022682	-1.2698	1.16475e-11	2.35805	1.0714	Rrn3	protein_coding	RRN3 RNA polymerase I transcription factor homolog (yeast) [Source:MGI Symbol;Acc:MGI:1925255]
ENSMUSG00000058833	-1.27358	1.17587e-11	3.989	2.68686	Rex1bd	protein_coding	required for excision 1-B domain containing [Source:MGI Symbol;Acc:MGI:1913712]
ENSMUSG00000037818	-1.50846	1.17587e-11	2.79734	1.26804	Abhd18	protein_coding	abhydrolase domain containing 18 [Source:MGI Symbol;Acc:MGI:1915468]
ENSMUSG00000026203	-1.66732	1.18167e-11	4.62167	2.92306	Dnajb2	protein_coding	DnaJ heat shock protein family (Hsp40) member B2 [Source:MGI Symbol;Acc:MGI:1928739]
ENSMUSG00000050199	-0.970314	1.18186e-11	2.09004	1.10094	Lgr4	protein_coding	leucine-rich repeat-containing G protein-coupled receptor 4 [Source:MGI Symbol;Acc:MGI:1891468]
ENSMUSG00000020516	-1.16487	1.19872e-11	2.37185	1.18896	Rps6kb1	protein_coding	ribosomal protein S6 kinase, polypeptide 1 [Source:MGI Symbol;Acc:MGI:1270849]
ENSMUSG00000041417	-1.23017	1.20646e-11	3.1001	1.84892	Pik3r1	protein_coding	phosphoinositide-3-kinase regulatory subunit 1 [Source:MGI Symbol;Acc:MGI:97583]
ENSMUSG00000017291	-2.21431	1.21888e-11	4.73258	2.48936	Taok1	protein_coding	TAO kinase 1 [Source:MGI Symbol;Acc:MGI:1914490]
ENSMUSG00000019923	-0.244052	1.2201e-11	1.3385	1.08145	Zwint	protein_coding	ZW10 interactor [Source:MGI Symbol;Acc:MGI:1289227]
ENSMUSG00000002660	-1.61039	1.22197e-11	3.61722	1.98363	Clpp	protein_coding	caseinolytic mitochondrial matrix peptidase proteolytic subunit [Source:MGI Symbol;Acc:MGI:1858213]
ENSMUSG00000028607	-1.93668	1.22197e-11	6.10057	4.10521	Cpt2	protein_coding	carnitine palmitoyltransferase 2 [Source:MGI Symbol;Acc:MGI:109176]
ENSMUSG00000024014	-0.91517	1.22782e-11	1.62786	0.698414	Pim1	protein_coding	proviral integration site 1 [Source:MGI Symbol;Acc:MGI:97584]
ENSMUSG00000047866	-1.50083	1.23453e-11	4.2722	2.7419	Lonp2	protein_coding	lon peptidase 2, peroxisomal [Source:MGI Symbol;Acc:MGI:1914137]
ENSMUSG00000006304	-1.83334	1.23453e-11	5.19395	3.32304	Arpc2	protein_coding	actin related protein 2/3 complex, subunit 2 [Source:MGI Symbol;Acc:MGI:1923959]
ENSMUSG00000027884	-1.35872	1.24888e-11	1.94637	0.567636	Clcc1	protein_coding	chloride channel CLIC-like 1 [Source:MGI Symbol;Acc:MGI:2385186]
ENSMUSG00000025348	-2.01733	1.25406e-11	4.50145	2.45579	Itga7	protein_coding	integrin alpha 7 [Source:MGI Symbol;Acc:MGI:102700]
ENSMUSG00000029780	-1.57699	1.27451e-11	4.35297	2.74643	Nt5c3	protein_coding	5'-nucleotidase, cytosolic III [Source:MGI Symbol;Acc:MGI:1927186]
ENSMUSG00000021996	-2.23384	1.27538e-11	5.009	2.74306	Esd	protein_coding	esterase D/formylglutathione hydrolase [Source:MGI Symbol;Acc:MGI:95421]
ENSMUSG00000003360	-0.399997	1.28186e-11	0.852166	0.436279	Ddx23	protein_coding	DEAD (Asp-Glu-Ala-Asp) box polypeptide 23 [Source:MGI Symbol;Acc:MGI:1921601]
ENSMUSG00000000605	-1.90441	1.29922e-11	3.76844	1.84208	Clcn4	protein_coding	chloride channel, voltage-sensitive 4 [Source:MGI Symbol;Acc:MGI:104571]
ENSMUSG00000026377	-0.599141	1.30605e-11	1.03477	0.412718	Nifk	protein_coding	nucleolar protein interacting with the FHA domain of MKI67 [Source:MGI Symbol;Acc:MGI:1915199]
ENSMUSG00000001100	-1.15136	1.31971e-11	3.95575	2.77117	Poldip2	protein_coding	polymerase (DNA-directed), delta interacting protein 2 [Source:MGI Symbol;Acc:MGI:1915061]
ENSMUSG00000030306	-1.54448	1.31971e-11	2.86727	1.30104	Tmtc1	protein_coding	transmembrane and tetratricopeptide repeat containing 1 [Source:MGI Symbol;Acc:MGI:3039590]
ENSMUSG00000021484	-0.801041	1.34208e-11	1.53403	0.717971	Lman2	protein_coding	lectin, mannose-binding 2 [Source:MGI Symbol;Acc:MGI:1914140]
ENSMUSG00000029108	-1.68755	1.35595e-11	4.23169	2.51529	Pcdh7	protein_coding	protocadherin 7 [Source:MGI Symbol;Acc:MGI:1860487]
ENSMUSG00000042010	-1.54136	1.36583e-11	3.69712	2.13143	Acacb	protein_coding	acetyl-Coenzyme A carboxylase beta [Source:MGI Symbol;Acc:MGI:2140940]
ENSMUSG00000009090	-1.57177	1.36707e-11	3.68702	2.09075	Ap1b1	protein_coding	adaptor protein complex AP-1, beta 1 subunit [Source:MGI Symbol;Acc:MGI:1096368]
ENSMUSG00000028245	-1.44773	1.37648e-11	2.37241	0.90674	Nsmaf	protein_coding	neutral sphingomyelinase (N-SMase) activation associated factor [Source:MGI Symbol;Acc:MGI:1341864]
ENSMUSG00000025027	-0.963933	1.3843e-11	1.83169	0.853335	Xpnpep1	protein_coding	X-prolyl aminopeptidase (aminopeptidase P) 1, soluble [Source:MGI Symbol;Acc:MGI:2180003]
ENSMUSG00000038374	-2.16089	1.43117e-11	3.82038	1.63608	Rbm8a	protein_coding	RNA binding motif protein 8a [Source:MGI Symbol;Acc:MGI:1913129]
ENSMUSG00000017781	-1.41789	1.43668e-11	3.89024	2.44664	Pitpna	protein_coding	phosphatidylinositol transfer protein, alpha [Source:MGI Symbol;Acc:MGI:99887]
ENSMUSG00000016344	-1.35524	1.44274e-11	3.1192	1.7423	Ppdpf	protein_coding	pancreatic progenitor cell differentiation and proliferation factor [Source:MGI Symbol;Acc:MGI:1913746]
ENSMUSG00000038619	-1.07925	1.45599e-11	3.19859	2.09783	Ensa	protein_coding	endosulfine alpha [Source:MGI Symbol;Acc:MGI:1891189]
ENSMUSG00000061559	-1.66032	1.45663e-11	5.16032	3.45544	Wdr61	protein_coding	WD repeat domain 61 [Source:MGI Symbol;Acc:MGI:1917493]
ENSMUSG00000037935	-0.93577	1.46104e-11	2.65016	1.69626	Smarce1	protein_coding	SWI/SNF related, matrix associated, actin dependent regulator of chromatin, subfamily e, member 1 [Source:MGI Symbol;Acc:MGI:1927347]
ENSMUSG00000029580	-1.41431	1.47497e-11	3.9507	2.50615	Actb	protein_coding	actin, beta [Source:MGI Symbol;Acc:MGI:87904]
ENSMUSG00000028278	-1.95652	1.47971e-11	5.64844	3.6467	Rragd	protein_coding	Ras-related GTP binding D [Source:MGI Symbol;Acc:MGI:1098604]
ENSMUSG00000025917	-1.06502	1.48384e-11	3.29471	2.20618	Cops5	protein_coding	COP9 signalosome subunit 5 [Source:MGI Symbol;Acc:MGI:1349415]
ENSMUSG00000038880	-1.42614	1.48486e-11	4.4655	3.00072	Mrps34	protein_coding	mitochondrial ribosomal protein S34 [Source:MGI Symbol;Acc:MGI:1930188]
ENSMUSG00000027012	-1.62512	1.48486e-11	4.03458	2.38206	Dync1i2	protein_coding	dynein cytoplasmic 1 intermediate chain 2 [Source:MGI Symbol;Acc:MGI:107750]
ENSMUSG00000057181	-0.99364	1.5089e-11	2.14895	1.13437	5730455P16Rik	protein_coding	RIKEN cDNA 5730455P16 gene [Source:MGI Symbol;Acc:MGI:1917841]
ENSMUSG00000027099	-1.50829	1.5089e-11	4.77135	3.22167	Mtx2	protein_coding	metaxin 2 [Source:MGI Symbol;Acc:MGI:1859652]
ENSMUSG00000014504	-1.58319	1.5089e-11	3.81194	2.20363	Srp19	protein_coding	signal recognition particle 19 [Source:MGI Symbol;Acc:MGI:1913634]
ENSMUSG00000027422	-1.35282	1.52125e-11	3.7336	2.35544	Rrbp1	protein_coding	ribosome binding protein 1 [Source:MGI Symbol;Acc:MGI:1932395]
ENSMUSG00000022674	-1.3693	1.52125e-11	2.571	1.18203	Ube2v2	protein_coding	ubiquitin-conjugating enzyme E2 variant 2 [Source:MGI Symbol;Acc:MGI:1917870]
ENSMUSG00000010376	-1.58116	1.56227e-11	5.4473	3.80674	Nedd8	protein_coding	neural precursor cell expressed, developmentally down-regulated gene 8 [Source:MGI Symbol;Acc:MGI:97301]
ENSMUSG00000040904	-1.25354	1.57693e-11	3.12406	1.85017	Gm21988	protein_coding	predicted gene 21988 [Source:MGI Symbol;Acc:MGI:5439457]
ENSMUSG00000004667	-1.37672	1.57693e-11	4.05661	2.64833	Polr2e	protein_coding	polymerase (RNA) II (DNA directed) polypeptide E [Source:MGI Symbol;Acc:MGI:1913670]
ENSMUSG00000021288	-1.41468	1.57693e-11	2.4332	0.999949	Klc1	protein_coding	kinesin light chain 1 [Source:MGI Symbol;Acc:MGI:107978]
ENSMUSG00000024277	-1.18113	1.58338e-11	2.95222	1.7494	Mapre2	protein_coding	microtubule-associated protein, RP/EB family, member 2 [Source:MGI Symbol;Acc:MGI:106271]
ENSMUSG00000045624	-0.659915	1.61753e-11	2.02281	1.34695	Esf1	protein_coding	ESF1 nucleolar pre-rRNA processing protein homolog [Source:MGI Symbol;Acc:MGI:1913830]
ENSMUSG00000032407	-1.83848	1.64282e-11	3.5072	1.64355	U2surp	protein_coding	U2 snRNP-associated SURP domain containing [Source:MGI Symbol;Acc:MGI:1915208]
ENSMUSG00000019777	-0.80381	1.64602e-11	2.07342	1.25356	Hdac2	protein_coding	histone deacetylase 2 [Source:MGI Symbol;Acc:MGI:1097691]
ENSMUSG00000086784	-0.628261	1.67019e-11	1.46611	0.82572	Isoc2a	protein_coding	isochorismatase domain containing 2a [Source:MGI Symbol;Acc:MGI:3609243]
ENSMUSG00000030401	-1.24534	1.67282e-11	3.77849	2.50727	Rtn2	protein_coding	reticulon 2 (Z-band associated protein) [Source:MGI Symbol;Acc:MGI:107612]
ENSMUSG00000022200	-0.939833	1.679e-11	2.19489	1.23877	Golph3	protein_coding	golgi phosphoprotein 3 [Source:MGI Symbol;Acc:MGI:1913879]
ENSMUSG00000015002	-1.01944	1.6826e-11	2.88982	1.85041	Efr3a	protein_coding	EFR3 homolog A [Source:MGI Symbol;Acc:MGI:1923990]
ENSMUSG00000032667	-0.836073	1.68519e-11	2.17668	1.32484	Pon2	protein_coding	paraoxonase 2 [Source:MGI Symbol;Acc:MGI:106687]
ENSMUSG00000001847	-1.79888	1.73509e-11	4.09503	2.26979	Rac1	protein_coding	RAS-related C3 botulinum substrate 1 [Source:MGI Symbol;Acc:MGI:97845]
ENSMUSG00000039428	-1.09601	1.74557e-11	2.12288	1.01164	Tmem135	protein_coding	transmembrane protein 135 [Source:MGI Symbol;Acc:MGI:1920009]
ENSMUSG00000007617	-1.72863	1.74557e-11	3.55587	1.80315	Homer1	protein_coding	homer scaffolding protein 1 [Source:MGI Symbol;Acc:MGI:1347345]
ENSMUSG00000029313	-1.19685	1.7676e-11	2.11347	0.896208	Aff1	protein_coding	AF4/FMR2 family, member 1 [Source:MGI Symbol;Acc:MGI:1100819]
ENSMUSG00000021810	-0.767282	1.77291e-11	1.885	1.10141	Ecd	protein_coding	ecdysoneless homolog (Drosophila) [Source:MGI Symbol;Acc:MGI:1917851]
ENSMUSG00000019907	-1.27214	1.77592e-11	2.77948	1.48527	Ppp1r12a	protein_coding	protein phosphatase 1, regulatory (inhibitor) subunit 12A [Source:MGI Symbol;Acc:MGI:1309528]
ENSMUSG00000021476	-0.951941	1.83211e-11	2.6688	1.69898	Habp4	protein_coding	hyaluronic acid binding protein 4 [Source:MGI Symbol;Acc:MGI:1891713]
ENSMUSG00000002767	-2.07705	1.83211e-11	5.47277	3.35555	Mrpl2	protein_coding	mitochondrial ribosomal protein L2 [Source:MGI Symbol;Acc:MGI:1351622]
ENSMUSG00000055044	-0.928226	1.85325e-11	2.19308	1.24848	Pdlim1	protein_coding	PDZ and LIM domain 1 (elfin) [Source:MGI Symbol;Acc:MGI:1860611]
ENSMUSG00000038506	-2.19935	1.86552e-11	4.03773	1.81371	Dcun1d2	protein_coding	DCN1, defective in cullin neddylation 1, domain containing 2 (S. cerevisiae) [Source:MGI Symbol;Acc:MGI:2142792]
ENSMUSG00000074001	-1.01149	1.86663e-11	2.16337	1.13444	Klhl40	protein_coding	kelch-like 40 [Source:MGI Symbol;Acc:MGI:1919580]
ENSMUSG00000090451	-1.11291	1.88739e-11	3.44384	2.30596	Gm6133	protein_coding	predicted gene 6133 [Source:MGI Symbol;Acc:MGI:3647029]
ENSMUSG00000016833	-2.05892	1.8988e-11	6.56598	4.44027	Mrps18c	protein_coding	mitochondrial ribosomal protein S18C [Source:MGI Symbol;Acc:MGI:1915985]
ENSMUSG00000061979	-0.802988	1.93641e-11	1.77809	0.960284	Rcc1l	protein_coding	reculator of chromosome condensation 1 like [Source:MGI Symbol;Acc:MGI:2137600]
ENSMUSG00000036748	-1.50261	1.94294e-11	4.18281	2.6508	Cuedc2	protein_coding	CUE domain containing 2 [Source:MGI Symbol;Acc:MGI:1914366]
ENSMUSG00000034343	-1.80725	1.94294e-11	3.76218	1.92973	Ube2f	protein_coding	ubiquitin-conjugating enzyme E2F (putative) [Source:MGI Symbol;Acc:MGI:1915171]
ENSMUSG00000058239	-0.596077	1.95229e-11	2.58913	1.97557	Usf2	protein_coding	upstream transcription factor 2 [Source:MGI Symbol;Acc:MGI:99961]
ENSMUSG00000036168	-0.507164	1.97301e-11	1.62603	1.10615	Ccdc38	protein_coding	coiled-coil domain containing 38 [Source:MGI Symbol;Acc:MGI:2444738]
ENSMUSG00000028266	-1.0927	1.97301e-11	2.22739	1.11327	Lmo4	protein_coding	LIM domain only 4 [Source:MGI Symbol;Acc:MGI:109360]
ENSMUSG00000040532	-1.47973	1.97894e-11	3.13307	1.63171	Abhd11	protein_coding	abhydrolase domain containing 11 [Source:MGI Symbol;Acc:MGI:1916008]
ENSMUSG00000024892	-0.996112	1.98231e-11	1.78878	0.771602	Pcx	protein_coding	pyruvate carboxylase [Source:MGI Symbol;Acc:MGI:97520]
ENSMUSG00000005583	-2.25013	1.98231e-11	5.00719	2.72484	Mef2c	protein_coding	myocyte enhancer factor 2C [Source:MGI Symbol;Acc:MGI:99458]
ENSMUSG00000009633	-1.34701	1.98942e-11	2.60032	1.23516	G0s2	protein_coding	G0/G1 switch gene 2 [Source:MGI Symbol;Acc:MGI:1316737]
ENSMUSG00000025525	-1.94662	1.98942e-11	4.06001	2.08894	Apool	protein_coding	apolipoprotein O-like [Source:MGI Symbol;Acc:MGI:1915367]
ENSMUSG00000021111	-2.37147	1.98942e-11	4.12663	1.72867	Papola	protein_coding	poly (A) polymerase alpha [Source:MGI Symbol;Acc:MGI:109301]
ENSMUSG00000037242	-1.64814	1.99605e-11	4.94956	3.257	Clic4	protein_coding	chloride intracellular channel 4 (mitochondrial) [Source:MGI Symbol;Acc:MGI:1352754]
ENSMUSG00000068877	-0.871893	2.0117e-11	1.98006	1.0917	Selenbp2	protein_coding	selenium binding protein 2 [Source:MGI Symbol;Acc:MGI:104859]
ENSMUSG00000033044	-1.10834	2.04377e-11	2.96814	1.83997	Dhrs7c	protein_coding	dehydrogenase/reductase (SDR family) member 7C [Source:MGI Symbol;Acc:MGI:1915710]
ENSMUSG00000074749	-1.10977	2.04636e-11	2.73804	1.60969	Kiz	protein_coding	kizuna centrosomal protein [Source:MGI Symbol;Acc:MGI:2684960]
ENSMUSG00000009079	-1.2553	2.04636e-11	3.20423	1.92648	Ewsr1	protein_coding	Ewing sarcoma breakpoint region 1 [Source:MGI Symbol;Acc:MGI:99960]
ENSMUSG00000025487	-0.506745	2.08961e-11	1.75801	1.23797	Psmd13	protein_coding	proteasome (prosome, macropain) 26S subunit, non-ATPase, 13 [Source:MGI Symbol;Acc:MGI:1345192]
ENSMUSG00000002980	-0.196831	2.12209e-11	1.3619	1.15615	Bcam	protein_coding	basal cell adhesion molecule [Source:MGI Symbol;Acc:MGI:1929940]
ENSMUSG00000026219	-1.85285	2.15472e-11	5.29814	3.40668	Trip12	protein_coding	thyroid hormone receptor interactor 12 [Source:MGI Symbol;Acc:MGI:1309481]
ENSMUSG00000030739	-1.35719	2.16603e-11	3.98181	2.59838	Myh14	protein_coding	myosin, heavy polypeptide 14 [Source:MGI Symbol;Acc:MGI:1919210]
ENSMUSG00000058230	-0.294871	2.19714e-11	1.46946	1.15999	Arhgap35	protein_coding	Rho GTPase activating protein 35 [Source:MGI Symbol;Acc:MGI:1929494]
ENSMUSG00000045767	-1.0221	2.19714e-11	1.71859	0.681999	B230219D22Rik	protein_coding	RIKEN cDNA B230219D22 gene [Source:MGI Symbol;Acc:MGI:1925771]
ENSMUSG00000020870	-0.605545	2.19737e-11	0.982749	0.364156	Cdc34b	protein_coding	cell division cycle 34B [Source:MGI Symbol;Acc:MGI:1858429]
ENSMUSG00000036438	-0.952993	2.2168e-11	3.89097	2.91053	Calm2	protein_coding	calmodulin 2 [Source:MGI Symbol;Acc:MGI:103250]
ENSMUSG00000037949	-1.4897	2.24135e-11	4.08829	2.56919	Ano10	protein_coding	anoctamin 10 [Source:MGI Symbol;Acc:MGI:2143103]
ENSMUSG00000022462	-1.48696	2.2466e-11	3.10724	1.60109	Slc38a2	protein_coding	solute carrier family 38, member 2 [Source:MGI Symbol;Acc:MGI:1915010]
ENSMUSG00000078886	-0.69718	2.2508e-11	1.412	0.697077	Gm2026	protein_coding	predicted gene 2026 [Source:MGI Symbol;Acc:MGI:3780195]
ENSMUSG00000064225	-0.58114	2.26113e-11	1.91995	1.32419	Paqr9	protein_coding	progestin and adipoQ receptor family member IX [Source:MGI Symbol;Acc:MGI:1922802]
ENSMUSG00000006673	-1.10193	2.26144e-11	1.59918	0.480629	Qrich1	protein_coding	glutamine-rich 1 [Source:MGI Symbol;Acc:MGI:1916482]
ENSMUSG00000022770	-1.99253	2.28702e-11	3.59697	1.57895	Dlg1	protein_coding	discs, large homolog 1 (Drosophila) [Source:MGI Symbol;Acc:MGI:107231]
ENSMUSG00000008658	-1.47805	2.29346e-11	2.31	0.814887	Rbfox1	protein_coding	RNA binding protein, fox-1 homolog (C. elegans) 1 [Source:MGI Symbol;Acc:MGI:1926224]
ENSMUSG00000090258	-2.54822	2.29346e-11	5.0144	2.43556	Churc1	protein_coding	churchill domain containing 1 [Source:MGI Symbol;Acc:MGI:1923684]
ENSMUSG00000042520	-1.73665	2.30201e-11	4.01347	2.24863	Ubap2l	protein_coding	ubiquitin-associated protein 2-like [Source:MGI Symbol;Acc:MGI:1921633]
ENSMUSG00000023307	-1.51227	2.30431e-11	3.75585	2.21872	38412	protein_coding	membrane-associated ring finger (C3HC4) 5 [Source:MGI Symbol;Acc:MGI:1915207]
ENSMUSG00000033124	-1.55142	2.30644e-11	2.51155	0.940334	Atg9a	protein_coding	autophagy related 9A [Source:MGI Symbol;Acc:MGI:2138446]
ENSMUSG00000005871	-1.44616	2.30915e-11	2.91285	1.44467	Apc	protein_coding	adenomatosis polyposis coli [Source:MGI Symbol;Acc:MGI:88039]
ENSMUSG00000003161	-0.794058	2.3265e-11	1.50056	0.68444	Sri	protein_coding	sorcin [Source:MGI Symbol;Acc:MGI:98419]
ENSMUSG00000017843	-1.58276	2.34094e-11	3.87802	2.26973	Ppp2r5c	protein_coding	protein phosphatase 2, regulatory subunit B', gamma [Source:MGI Symbol;Acc:MGI:1349475]
ENSMUSG00000098650	-0.464144	2.34395e-11	1.07253	0.592812	Gm28048	protein_coding	predicted gene, 28048 [Source:MGI Symbol;Acc:MGI:5547784]
ENSMUSG00000022546	-0.467652	2.35075e-11	1.84096	1.36007	Gpt	protein_coding	glutamic pyruvic transaminase, soluble [Source:MGI Symbol;Acc:MGI:95802]
ENSMUSG00000027589	-1.47736	2.3735e-11	2.8182	1.31932	Pcmtd2	protein_coding	protein-L-isoaspartate (D-aspartate) O-methyltransferase domain containing 2 [Source:MGI Symbol;Acc:MGI:1923927]
ENSMUSG00000028822	-1.11134	2.40618e-11	2.11482	0.988328	Tmem50a	protein_coding	transmembrane protein 50A [Source:MGI Symbol;Acc:MGI:1919067]
ENSMUSG00000071342	-1.19606	2.40618e-11	2.23403	1.0206	Lsmem1	protein_coding	leucine-rich single-pass membrane protein 1 [Source:MGI Symbol;Acc:MGI:2685735]
ENSMUSG00000037826	-1.65574	2.40618e-11	3.89732	2.21632	Ppm1k	protein_coding	protein phosphatase 1K (PP2C domain containing) [Source:MGI Symbol;Acc:MGI:2442111]
ENSMUSG00000031221	-1.04786	2.41e-11	2.36501	1.2997	Igbp1	protein_coding	immunoglobulin (CD79A) binding protein 1 [Source:MGI Symbol;Acc:MGI:1346500]
ENSMUSG00000020027	-1.36504	2.41e-11	2.51628	1.12759	Socs2	protein_coding	suppressor of cytokine signaling 2 [Source:MGI Symbol;Acc:MGI:1201787]
ENSMUSG00000007279	-0.601924	2.4117e-11	2.22377	1.60287	Scube2	protein_coding	signal peptide, CUB domain, EGF-like 2 [Source:MGI Symbol;Acc:MGI:1928765]
ENSMUSG00000039163	-1.49114	2.41587e-11	3.1326	1.61914	Cmc1	protein_coding	COX assembly mitochondrial protein 1 [Source:MGI Symbol;Acc:MGI:1915149]
ENSMUSG00000061838	-1.9251	2.41587e-11	5.3113	3.34459	Suclg2	protein_coding	succinate-Coenzyme A ligase, GDP-forming, beta subunit [Source:MGI Symbol;Acc:MGI:1306824]
ENSMUSG00000027374	-0.605401	2.42308e-11	2.27948	1.65784	Mrps5	protein_coding	mitochondrial ribosomal protein S5 [Source:MGI Symbol;Acc:MGI:1924971]
ENSMUSG00000028577	-0.914148	2.42308e-11	2.48134	1.54998	Plaa	protein_coding	phospholipase A2, activating protein [Source:MGI Symbol;Acc:MGI:104810]
ENSMUSG00000031568	-1.2117	2.42308e-11	2.72556	1.49571	Rwdd4a	protein_coding	RWD domain containing 4A [Source:MGI Symbol;Acc:MGI:2681000]
ENSMUSG00000018377	-1.58294	2.43588e-11	3.17668	1.57393	Vezf1	protein_coding	vascular endothelial zinc finger 1 [Source:MGI Symbol;Acc:MGI:1313291]
ENSMUSG00000032560	-0.750476	2.43744e-11	1.68896	0.922254	Dnajc13	protein_coding	DnaJ heat shock protein family (Hsp40) member C13 [Source:MGI Symbol;Acc:MGI:2676368]
ENSMUSG00000015994	-1.22747	2.43744e-11	3.29009	2.04076	Fnta	protein_coding	farnesyltransferase, CAAX box, alpha [Source:MGI Symbol;Acc:MGI:104683]
ENSMUSG00000021824	-1.39449	2.43744e-11	3.23667	1.82108	Ap3m1	protein_coding	adaptor-related protein complex 3, mu 1 subunit [Source:MGI Symbol;Acc:MGI:1929212]
ENSMUSG00000027479	-1.33439	2.44603e-11	3.02008	1.66579	Mapre1	protein_coding	microtubule-associated protein, RP/EB family, member 1 [Source:MGI Symbol;Acc:MGI:891995]
ENSMUSG00000090266	-1.54248	2.45339e-11	3.28824	1.72506	Mettl23	protein_coding	methyltransferase like 23 [Source:MGI Symbol;Acc:MGI:1921569]
ENSMUSG00000027108	-0.571718	2.48062e-11	3.39607	2.80239	Ola1	protein_coding	Obg-like ATPase 1 [Source:MGI Symbol;Acc:MGI:1914309]
ENSMUSG00000060377	-1.26361	2.48285e-11	2.96164	1.67882	Rpl36a-ps1	protein_coding	ribosomal protein L36A, pseudogene 1 [Source:MGI Symbol;Acc:MGI:3642585]
ENSMUSG00000002831	-1.681	2.48697e-11	3.41846	1.71618	Plin4	protein_coding	perilipin 4 [Source:MGI Symbol;Acc:MGI:1929709]
ENSMUSG00000063659	-1.88299	2.48701e-11	3.05671	1.14882	Zbtb18	protein_coding	zinc finger and BTB domain containing 18 [Source:MGI Symbol;Acc:MGI:1353609]
ENSMUSG00000040174	-1.30369	2.49203e-11	2.59888	1.27712	Alkbh3	protein_coding	alkB homolog 3, alpha-ketoglutarate-dependent dioxygenase [Source:MGI Symbol;Acc:MGI:1916363]
ENSMUSG00000021149	-1.35852	2.49756e-11	2.63842	1.26124	Gtpbp4	protein_coding	GTP binding protein 4 [Source:MGI Symbol;Acc:MGI:1916487]
ENSMUSG00000031960	-0.854259	2.52606e-11	2.18875	1.31864	Aars	protein_coding	alanyl-tRNA synthetase [Source:MGI Symbol;Acc:MGI:2384560]
ENSMUSG00000030515	-1.1781	2.52606e-11	2.92369	1.72571	Tarsl2	protein_coding	threonyl-tRNA synthetase-like 2 [Source:MGI Symbol;Acc:MGI:2444486]
ENSMUSG00000024654	-1.41283	2.52955e-11	2.93347	1.50134	Asrgl1	protein_coding	asparaginase like 1 [Source:MGI Symbol;Acc:MGI:1913764]
ENSMUSG00000022594	-1.44103	2.52955e-11	3.93396	2.4637	Lynx1	protein_coding	Ly6/neurotoxin 1 [Source:MGI Symbol;Acc:MGI:1345180]
ENSMUSG00000002222	-0.710887	2.5418e-11	2.69505	1.96593	Rmnd5a	protein_coding	required for meiotic nuclear division 5 homolog A [Source:MGI Symbol;Acc:MGI:1915727]
ENSMUSG00000059518	-1.31913	2.5418e-11	3.15294	1.81334	Znhit1	protein_coding	zinc finger, HIT domain containing 1 [Source:MGI Symbol;Acc:MGI:1917353]
ENSMUSG00000027597	-0.68692	2.57898e-11	1.59376	0.892277	Ahcy	protein_coding	S-adenosylhomocysteine hydrolase [Source:MGI Symbol;Acc:MGI:87968]
ENSMUSG00000023027	-1.1299	2.58727e-11	2.72762	1.57931	Atf1	protein_coding	activating transcription factor 1 [Source:MGI Symbol;Acc:MGI:1298366]
ENSMUSG00000020074	-1.55146	2.60958e-11	4.49835	2.91651	Ccar1	protein_coding	cell division cycle and apoptosis regulator 1 [Source:MGI Symbol;Acc:MGI:1914750]
ENSMUSG00000039318	-0.498185	2.62492e-11	2.26362	1.7502	Rab3gap2	protein_coding	RAB3 GTPase activating protein subunit 2 [Source:MGI Symbol;Acc:MGI:1916043]
ENSMUSG00000022283	-1.09793	2.6278e-11	2.95108	1.83353	Pabpc1	protein_coding	poly(A) binding protein, cytoplasmic 1 [Source:MGI Symbol;Acc:MGI:1349722]
ENSMUSG00000045038	-0.748525	2.63652e-11	1.54889	0.783435	Prkce	protein_coding	protein kinase C, epsilon [Source:MGI Symbol;Acc:MGI:97599]
ENSMUSG00000035849	-0.966893	2.68948e-11	2.2761	1.29204	Krt222	protein_coding	keratin 222 [Source:MGI Symbol;Acc:MGI:2442728]
ENSMUSG00000002346	-0.811505	2.69445e-11	1.79474	0.967263	Slc25a42	protein_coding	solute carrier family 25, member 42 [Source:MGI Symbol;Acc:MGI:1920345]
ENSMUSG00000024442	-0.989596	2.69445e-11	2.77461	1.76672	0610009O20Rik	protein_coding	RIKEN cDNA 0610009O20 gene [Source:MGI Symbol;Acc:MGI:1914089]
ENSMUSG00000057278	-1.24947	2.69445e-11	2.20907	0.943465	Snrpg	protein_coding	small nuclear ribonucleoprotein polypeptide G [Source:MGI Symbol;Acc:MGI:1915261]
ENSMUSG00000001924	-1.39962	2.71003e-11	3.82594	2.40132	Uba1	protein_coding	ubiquitin-like modifier activating enzyme 1 [Source:MGI Symbol;Acc:MGI:98890]
ENSMUSG00000026123	-0.400405	2.71836e-11	3.05348	2.63324	Plekhb2	protein_coding	pleckstrin homology domain containing, family B (evectins) member 2 [Source:MGI Symbol;Acc:MGI:2385825]
ENSMUSG00000029836	-1.2987	2.71918e-11	3.38213	2.06069	Cbx3	protein_coding	chromobox 3 [Source:MGI Symbol;Acc:MGI:108515]
ENSMUSG00000020530	-2.09509	2.72389e-11	4.96891	2.84182	Ggnbp2	protein_coding	gametogenetin binding protein 2 [Source:MGI Symbol;Acc:MGI:2387356]
ENSMUSG00000022111	-1.0166	2.74374e-11	3.64749	2.60634	Uchl3	protein_coding	ubiquitin carboxyl-terminal esterase L3 (ubiquitin thiolesterase) [Source:MGI Symbol;Acc:MGI:1355274]
ENSMUSG00000032340	-0.800559	2.77258e-11	1.8723	1.05478	Neo1	protein_coding	neogenin [Source:MGI Symbol;Acc:MGI:1097159]
ENSMUSG00000027254	-0.381909	2.80342e-11	1.42873	1.03458	Map1a	protein_coding	microtubule-associated protein 1 A [Source:MGI Symbol;Acc:MGI:1306776]
ENSMUSG00000041231	-0.775344	2.80342e-11	1.71572	0.923421	Ublcp1	protein_coding	ubiquitin-like domain containing CTD phosphatase 1 [Source:MGI Symbol;Acc:MGI:1933105]
ENSMUSG00000018583	-0.969892	2.8053e-11	3.19452	2.20363	G3bp1	protein_coding	GTPase activating protein (SH3 domain) binding protein 1 [Source:MGI Symbol;Acc:MGI:1351465]
ENSMUSG00000015095	-0.830798	2.83818e-11	2.2057	1.36002	Fbxw5	protein_coding	F-box and WD-40 domain protein 5 [Source:MGI Symbol;Acc:MGI:1354731]
ENSMUSG00000057497	-0.749073	2.84541e-11	2.40593	1.6399	Fam136a	protein_coding	family with sequence similarity 136, member A [Source:MGI Symbol;Acc:MGI:1913738]
ENSMUSG00000025885	-1.1817	2.84541e-11	2.00336	0.803576	Myo5b	protein_coding	myosin VB [Source:MGI Symbol;Acc:MGI:106598]
ENSMUSG00000034875	-1.60278	2.86866e-11	3.40357	1.78019	Nudt19	protein_coding	nudix (nucleoside diphosphate linked moiety X)-type motif 19 [Source:MGI Symbol;Acc:MGI:94203]
ENSMUSG00000015542	-0.855923	2.8753e-11	1.82424	0.949584	Nat9	protein_coding	N-acetyltransferase 9 (GCN5-related, putative) [Source:MGI Symbol;Acc:MGI:1913426]
ENSMUSG00000032309	-0.986156	2.89581e-11	2.31729	1.31243	Fbxo22	protein_coding	F-box protein 22 [Source:MGI Symbol;Acc:MGI:1926014]
ENSMUSG00000054733	-1.50767	2.90965e-11	3.20973	1.68099	Msra	protein_coding	methionine sulfoxide reductase A [Source:MGI Symbol;Acc:MGI:106916]
ENSMUSG00000005677	-0.713107	2.92182e-11	2.25657	1.52713	Nr1i3	protein_coding	nuclear receptor subfamily 1, group I, member 3 [Source:MGI Symbol;Acc:MGI:1346307]
ENSMUSG00000030105	-1.24611	3.00876e-11	3.67433	2.40195	Arl8b	protein_coding	ADP-ribosylation factor-like 8B [Source:MGI Symbol;Acc:MGI:1914416]
ENSMUSG00000024413	-0.927291	3.00899e-11	1.19333	0.250088	Npc1	protein_coding	NPC intracellular cholesterol transporter 1 [Source:MGI Symbol;Acc:MGI:1097712]
ENSMUSG00000020964	-1.32106	3.00899e-11	2.99477	1.65396	Sel1l	protein_coding	sel-1 suppressor of lin-12-like (C. elegans) [Source:MGI Symbol;Acc:MGI:1329016]
ENSMUSG00000099913	-0.809525	3.01427e-11	2.80277	1.97528	Gm28551	protein_coding	predicted gene 28551 [Source:MGI Symbol;Acc:MGI:5579257]
ENSMUSG00000026245	-1.3984	3.0264e-11	2.13416	0.719972	Farsb	protein_coding	phenylalanyl-tRNA synthetase, beta subunit [Source:MGI Symbol;Acc:MGI:1346035]
ENSMUSG00000055204	-2.02806	3.0264e-11	5.33496	3.2708	Ankrd17	protein_coding	ankyrin repeat domain 17 [Source:MGI Symbol;Acc:MGI:1932101]
ENSMUSG00000003235	-1.25794	3.05195e-11	3.17546	1.89678	Eif2b5	protein_coding	eukaryotic translation initiation factor 2B, subunit 5 epsilon [Source:MGI Symbol;Acc:MGI:2446176]
ENSMUSG00000034729	-1.59036	3.1256e-11	2.99997	1.38529	Mrps10	protein_coding	mitochondrial ribosomal protein S10 [Source:MGI Symbol;Acc:MGI:1928139]
ENSMUSG00000034681	-1.86216	3.1332e-11	3.38293	1.49734	Rnps1	protein_coding	ribonucleic acid binding protein S1 [Source:MGI Symbol;Acc:MGI:97960]
ENSMUSG00000028861	-0.98313	3.1384e-11	3.40579	2.40005	Mrps15	protein_coding	mitochondrial ribosomal protein S15 [Source:MGI Symbol;Acc:MGI:1913657]
ENSMUSG00000030826	-0.936044	3.16265e-11	1.57028	0.619623	Bcat2	protein_coding	branched chain aminotransferase 2, mitochondrial [Source:MGI Symbol;Acc:MGI:1276534]
ENSMUSG00000000384	-1.28735	3.18055e-11	3.19139	1.8833	Tbrg4	protein_coding	transforming growth factor beta regulated gene 4 [Source:MGI Symbol;Acc:MGI:1100868]
ENSMUSG00000048222	-0.770414	3.22603e-11	2.68817	1.90008	Mfap1b	protein_coding	microfibrillar-associated protein 1B [Source:MGI Symbol;Acc:MGI:3694697]
ENSMUSG00000041408	-1.76256	3.22603e-11	3.03953	1.25522	Wapl	protein_coding	WAPL cohesin release factor [Source:MGI Symbol;Acc:MGI:2675859]
ENSMUSG00000047126	-1.94838	3.22603e-11	5.05161	3.06717	Cltc	protein_coding	clathrin, heavy polypeptide (Hc) [Source:MGI Symbol;Acc:MGI:2388633]
ENSMUSG00000062867	-0.754016	3.23888e-11	2.02696	1.25723	Impdh2	protein_coding	inosine monophosphate dehydrogenase 2 [Source:MGI Symbol;Acc:MGI:109367]
ENSMUSG00000026965	-0.435179	3.24695e-11	0.911564	0.463877	Anapc2	protein_coding	anaphase promoting complex subunit 2 [Source:MGI Symbol;Acc:MGI:2139135]
ENSMUSG00000059852	-1.61996	3.25466e-11	4.21153	2.56218	Kcng2	protein_coding	potassium voltage-gated channel, subfamily G, member 2 [Source:MGI Symbol;Acc:MGI:3694646]
ENSMUSG00000031367	-1.49534	3.26461e-11	2.22144	0.708362	Ap1s2	protein_coding	adaptor-related protein complex 1, sigma 2 subunit [Source:MGI Symbol;Acc:MGI:1889383]
ENSMUSG00000010453	-1.07737	3.31186e-11	2.49548	1.39766	Kansl3	protein_coding	KAT8 regulatory NSL complex subunit 3 [Source:MGI Symbol;Acc:MGI:1918055]
ENSMUSG00000033335	-1.07048	3.3476e-11	2.7783	1.68858	Dnm2	protein_coding	dynamin 2 [Source:MGI Symbol;Acc:MGI:109547]
ENSMUSG00000039770	-0.712575	3.34939e-11	2.08197	1.35461	Ypel5	protein_coding	yippee-like 5 (Drosophila) [Source:MGI Symbol;Acc:MGI:1916937]
ENSMUSG00000004771	-1.16419	3.35276e-11	3.88343	2.69266	Rab11a	protein_coding	RAB11A, member RAS oncogene family [Source:MGI Symbol;Acc:MGI:1858202]
ENSMUSG00000043445	-1.00218	3.36756e-11	2.1538	1.13544	Pgp	protein_coding	phosphoglycolate phosphatase [Source:MGI Symbol;Acc:MGI:1914328]
ENSMUSG00000006169	-0.952913	3.4182e-11	3.20253	2.22844	Clint1	protein_coding	clathrin interactor 1 [Source:MGI Symbol;Acc:MGI:2144243]
ENSMUSG00000014748	-0.885822	3.47568e-11	2.66904	1.76558	Tex261	protein_coding	testis expressed gene 261 [Source:MGI Symbol;Acc:MGI:1096575]
ENSMUSG00000022895	-0.952987	3.47782e-11	2.06456	1.09643	Ets2	protein_coding	E26 avian leukemia oncogene 2, 3' domain [Source:MGI Symbol;Acc:MGI:95456]
ENSMUSG00000078153	-0.592313	3.48137e-11	2.06751	1.46174	Psme2b	protein_coding	protease (prosome, macropain) activator subunit 2B [Source:MGI Symbol;Acc:MGI:1341073]
ENSMUSG00000021737	-1.74739	3.51241e-11	3.86083	2.0896	Psmd6	protein_coding	proteasome (prosome, macropain) 26S subunit, non-ATPase, 6 [Source:MGI Symbol;Acc:MGI:1913663]
ENSMUSG00000014867	-1.20963	3.52477e-11	3.75712	2.52174	Surf4	protein_coding	surfeit gene 4 [Source:MGI Symbol;Acc:MGI:98445]
ENSMUSG00000021339	-1.16626	3.54035e-11	2.11849	0.935328	Mrs2	protein_coding	MRS2 magnesium transporter [Source:MGI Symbol;Acc:MGI:2685748]
ENSMUSG00000026309	-1.17817	3.54559e-11	2.31397	1.11973	Ilkap	protein_coding	integrin-linked kinase-associated serine/threonine phosphatase 2C [Source:MGI Symbol;Acc:MGI:1914694]
ENSMUSG00000000056	-0.886748	3.56084e-11	3.22141	2.31191	Narf	protein_coding	nuclear prelamin A recognition factor [Source:MGI Symbol;Acc:MGI:1914858]
ENSMUSG00000022914	-1.79418	3.56084e-11	3.66263	1.84497	Brwd1	protein_coding	bromodomain and WD repeat domain containing 1 [Source:MGI Symbol;Acc:MGI:1890651]
ENSMUSG00000020085	-1.04795	3.59115e-11	1.87021	0.801588	Aifm2	protein_coding	apoptosis-inducing factor, mitochondrion-associated 2 [Source:MGI Symbol;Acc:MGI:1918611]
ENSMUSG00000029998	-0.870807	3.6309e-11	2.23234	1.34582	Pcyox1	protein_coding	prenylcysteine oxidase 1 [Source:MGI Symbol;Acc:MGI:1914131]
ENSMUSG00000028466	-0.714703	3.63434e-11	1.73442	1.00497	Creb3	protein_coding	cAMP responsive element binding protein 3 [Source:MGI Symbol;Acc:MGI:99946]
ENSMUSG00000067038	-0.900704	3.63434e-11	2.87135	1.95106	Rps12-ps3	protein_coding	ribosomal protein S12, pseudogene 3 [Source:MGI Symbol;Acc:MGI:3704503]
ENSMUSG00000022100	-1.40075	3.63434e-11	1.95814	0.542429	Xpo7	protein_coding	exportin 7 [Source:MGI Symbol;Acc:MGI:1929705]
ENSMUSG00000022992	-1.18732	3.67404e-11	2.08497	0.882206	Kansl2	protein_coding	KAT8 regulatory NSL complex subunit 2 [Source:MGI Symbol;Acc:MGI:1916862]
ENSMUSG00000026492	-1.31624	3.68826e-11	3.20205	1.8651	Tfb2m	protein_coding	transcription factor B2, mitochondrial [Source:MGI Symbol;Acc:MGI:107937]
ENSMUSG00000033545	-1.03086	3.762e-11	3.11744	2.06456	Znrf1	protein_coding	zinc and ring finger 1 [Source:MGI Symbol;Acc:MGI:2177308]
ENSMUSG00000035086	-1.09905	3.76413e-11	2.40452	1.28749	Becn1	protein_coding	beclin 1, autophagy related [Source:MGI Symbol;Acc:MGI:1891828]
ENSMUSG00000001419	-0.76126	3.76528e-11	2.99386	2.21344	Mef2d	protein_coding	myocyte enhancer factor 2D [Source:MGI Symbol;Acc:MGI:99533]
ENSMUSG00000041193	-1.02287	3.76927e-11	2.09483	1.052	Pla2g5	protein_coding	phospholipase A2, group V [Source:MGI Symbol;Acc:MGI:101899]
ENSMUSG00000022136	-0.879569	3.77101e-11	2.30977	1.41297	Dnajc3	protein_coding	DnaJ heat shock protein family (Hsp40) member C3 [Source:MGI Symbol;Acc:MGI:107373]
ENSMUSG00000027620	-1.67372	3.77101e-11	5.03274	3.32433	Rbm39	protein_coding	RNA binding motif protein 39 [Source:MGI Symbol;Acc:MGI:2157953]
ENSMUSG00000049643	-1.67278	3.77755e-11	3.4785	1.78287	2310022A10Rik	protein_coding	RIKEN cDNA 2310022A10 gene [Source:MGI Symbol;Acc:MGI:1913617]
ENSMUSG00000029723	-1.81772	3.77755e-11	4.47703	2.62996	Tsc22d4	protein_coding	TSC22 domain family, member 4 [Source:MGI Symbol;Acc:MGI:1926079]
ENSMUSG00000022565	-2.80605	3.77755e-11	6.63219	3.78393	Plec	protein_coding	plectin [Source:MGI Symbol;Acc:MGI:1277961]
ENSMUSG00000020448	-0.771831	3.79578e-11	1.54427	0.753405	Rnf185	protein_coding	ring finger protein 185 [Source:MGI Symbol;Acc:MGI:1922078]
ENSMUSG00000050552	-0.630519	3.8245e-11	2.06901	1.42477	Lamtor4	protein_coding	late endosomal/lysosomal adaptor, MAPK and MTOR activator 4 [Source:MGI Symbol;Acc:MGI:1913346]
ENSMUSG00000019943	-1.01811	3.83686e-11	2.77966	1.74265	Atp2b1	protein_coding	ATPase, Ca++ transporting, plasma membrane 1 [Source:MGI Symbol;Acc:MGI:104653]
ENSMUSG00000029621	-0.768615	3.89557e-11	1.47789	0.694931	Arpc1a	protein_coding	actin related protein 2/3 complex, subunit 1A [Source:MGI Symbol;Acc:MGI:1928896]
ENSMUSG00000047875	-0.83475	3.90202e-11	1.48502	0.634584	Gpr157	protein_coding	G protein-coupled receptor 157 [Source:MGI Symbol;Acc:MGI:2442046]
ENSMUSG00000039911	-0.670747	3.90254e-11	0.989604	0.303795	Spsb1	protein_coding	splA/ryanodine receptor domain and SOCS box containing 1 [Source:MGI Symbol;Acc:MGI:1921896]
ENSMUSG00000070934	-0.311084	3.91853e-11	1.47116	1.14833	Rraga	protein_coding	Ras-related GTP binding A [Source:MGI Symbol;Acc:MGI:1915691]
ENSMUSG00000052915	-1.38557	3.91955e-11	3.11825	1.71264	Msl1	protein_coding	male-specific lethal 1 homolog (Drosophila) [Source:MGI Symbol;Acc:MGI:1921276]
ENSMUSG00000039703	-1.67546	3.96599e-11	3.1849	1.4896	Nploc4	protein_coding	NPL4 homolog, ubiquitin recognition factor [Source:MGI Symbol;Acc:MGI:2679787]
ENSMUSG00000030298	-1.20361	4.00643e-11	2.50638	1.285	Sec13	protein_coding	SEC13 homolog, nuclear pore and COPII coat complex component [Source:MGI Symbol;Acc:MGI:99832]
ENSMUSG00000025151	-0.841962	4.06311e-11	2.86933	2.00833	Maged1	protein_coding	melanoma antigen, family D, 1 [Source:MGI Symbol;Acc:MGI:1930187]
ENSMUSG00000035247	-1.55784	4.09981e-11	4.70137	3.11158	Hectd1	protein_coding	HECT domain E3 ubiquitin protein ligase 1 [Source:MGI Symbol;Acc:MGI:2384768]
ENSMUSG00000026112	-1.61538	4.12899e-11	4.22812	2.58353	Coa5	protein_coding	cytochrome C oxidase assembly factor 5 [Source:MGI Symbol;Acc:MGI:1923428]
ENSMUSG00000029616	-1.58846	4.16703e-11	3.16037	1.55195	Erp29	protein_coding	endoplasmic reticulum protein 29 [Source:MGI Symbol;Acc:MGI:1914647]
ENSMUSG00000026021	-1.44723	4.17742e-11	3.43985	1.97072	Sumo1	protein_coding	small ubiquitin-like modifier 1 [Source:MGI Symbol;Acc:MGI:1197010]
ENSMUSG00000068882	-1.7066	4.2119e-11	3.93539	2.20348	Ssb	protein_coding	Sjogren syndrome antigen B [Source:MGI Symbol;Acc:MGI:98423]
ENSMUSG00000048537	-1.5087	4.25609e-11	3.70032	2.16698	Phldb1	protein_coding	pleckstrin homology like domain, family B, member 1 [Source:MGI Symbol;Acc:MGI:2143230]
ENSMUSG00000032412	-0.786142	4.36207e-11	1.5178	0.716235	Atp1b3	protein_coding	ATPase, Na+/K+ transporting, beta 3 polypeptide [Source:MGI Symbol;Acc:MGI:107788]
ENSMUSG00000028433	-1.50507	4.3997e-11	2.62043	1.09704	Ubap2	protein_coding	ubiquitin-associated protein 2 [Source:MGI Symbol;Acc:MGI:1916176]
ENSMUSG00000023277	-1.90948	4.43254e-11	4.81588	2.87452	Twf2	protein_coding	twinfilin actin binding protein 2 [Source:MGI Symbol;Acc:MGI:1346078]
ENSMUSG00000026663	-1.26786	4.4471e-11	3.46184	2.17136	Atf6	protein_coding	activating transcription factor 6 [Source:MGI Symbol;Acc:MGI:1926157]
ENSMUSG00000000374	-1.15947	4.4638e-11	2.02732	0.853622	Trappc10	protein_coding	trafficking protein particle complex 10 [Source:MGI Symbol;Acc:MGI:1336209]
ENSMUSG00000030035	-0.828085	4.52271e-11	2.39233	1.5466	Wbp1	protein_coding	WW domain binding protein 1 [Source:MGI Symbol;Acc:MGI:104710]
ENSMUSG00000028932	-1.51393	4.52699e-11	4.00524	2.46354	Psmc2	protein_coding	proteasome (prosome, macropain) 26S subunit, ATPase 2 [Source:MGI Symbol;Acc:MGI:109555]
ENSMUSG00000038695	-2.24192	4.59661e-11	4.51266	2.24404	Josd2	protein_coding	Josephin domain containing 2 [Source:MGI Symbol;Acc:MGI:1913374]
ENSMUSG00000059040	-0.673088	4.59795e-11	2.65904	1.96892	Eno1b	protein_coding	enolase 1B, retrotransposed [Source:MGI Symbol;Acc:MGI:3648653]
ENSMUSG00000037174	-1.22913	4.62456e-11	2.04992	0.797855	Elf2	protein_coding	E74-like factor 2 [Source:MGI Symbol;Acc:MGI:1916507]
ENSMUSG00000032411	-1.50957	4.69088e-11	5.07572	3.53196	Tfdp2	protein_coding	transcription factor Dp 2 [Source:MGI Symbol;Acc:MGI:107167]
ENSMUSG00000052698	-2.02304	4.69088e-11	4.01322	1.96648	Tln2	protein_coding	talin 2 [Source:MGI Symbol;Acc:MGI:1917799]
ENSMUSG00000004798	-0.906556	4.71916e-11	2.73609	1.81144	Ulk2	protein_coding	unc-51 like kinase 2 [Source:MGI Symbol;Acc:MGI:1352758]
ENSMUSG00000027248	-1.01202	4.71916e-11	1.75482	0.727915	Pdia3	protein_coding	protein disulfide isomerase associated 3 [Source:MGI Symbol;Acc:MGI:95834]
ENSMUSG00000045414	-1.25836	4.71916e-11	2.10025	0.826126	1190002N15Rik	protein_coding	RIKEN cDNA 1190002N15 gene [Source:MGI Symbol;Acc:MGI:1916111]
ENSMUSG00000043962	-1.1889	4.72991e-11	3.14604	1.93637	Thrap3	protein_coding	thyroid hormone receptor associated protein 3 [Source:MGI Symbol;Acc:MGI:2442637]
ENSMUSG00000032398	-1.35987	4.76381e-11	2.4794	1.10365	Snapc5	protein_coding	small nuclear RNA activating complex, polypeptide 5 [Source:MGI Symbol;Acc:MGI:1914282]
ENSMUSG00000063428	-1.06829	4.81195e-11	1.84329	0.759925	Ddo	protein_coding	D-aspartate oxidase [Source:MGI Symbol;Acc:MGI:1925528]
ENSMUSG00000000743	-0.473272	4.83108e-11	1.51378	1.02914	Chmp1a	protein_coding	charged multivesicular body protein 1A [Source:MGI Symbol;Acc:MGI:1920159]
ENSMUSG00000018585	-1.14878	4.90163e-11	3.79651	2.62154	Atox1	protein_coding	antioxidant 1 copper chaperone [Source:MGI Symbol;Acc:MGI:1333855]
ENSMUSG00000067336	-1.41762	4.96248e-11	2.99848	1.562	Bmpr2	protein_coding	bone morphogenetic protein receptor, type II (serine/threonine kinase) [Source:MGI Symbol;Acc:MGI:1095407]
ENSMUSG00000027180	-1.75679	4.96248e-11	3.96947	2.18797	Fbxo3	protein_coding	F-box protein 3 [Source:MGI Symbol;Acc:MGI:1929084]
ENSMUSG00000022141	-1.42218	4.98474e-11	2.26683	0.824632	Nipbl	protein_coding	Nipped-B homolog (Drosophila) [Source:MGI Symbol;Acc:MGI:1913976]
ENSMUSG00000053565	-1.64725	4.98474e-11	4.83954	3.15757	Eif3k	protein_coding	eukaryotic translation initiation factor 3, subunit K [Source:MGI Symbol;Acc:MGI:1921080]
ENSMUSG00000042079	-1.94215	4.98474e-11	5.06733	3.09189	Hnrnpf	protein_coding	heterogeneous nuclear ribonucleoprotein F [Source:MGI Symbol;Acc:MGI:2138741]
ENSMUSG00000028333	-0.916241	5.03351e-11	3.28054	2.34302	Anp32b	protein_coding	acidic (leucine-rich) nuclear phosphoprotein 32 family, member B [Source:MGI Symbol;Acc:MGI:1914878]
ENSMUSG00000032966	-1.18797	5.05307e-11	3.47428	2.26141	Fkbp1a	protein_coding	FK506 binding protein 1a [Source:MGI Symbol;Acc:MGI:95541]
ENSMUSG00000039100	-1.59594	5.07631e-11	4.4245	2.79739	38777	protein_coding	membrane-associated ring finger (C3HC4) 6 [Source:MGI Symbol;Acc:MGI:2442773]
ENSMUSG00000018442	-1.25388	5.09643e-11	2.16758	0.894723	Derl2	protein_coding	Der1-like domain family, member 2 [Source:MGI Symbol;Acc:MGI:2151483]
ENSMUSG00000024869	-0.877581	5.13086e-11	4.93264	4.01214	Nudt8	protein_coding	nudix (nucleoside diphosphate linked moiety X)-type motif 8 [Source:MGI Symbol;Acc:MGI:1913637]
ENSMUSG00000021898	-1.60534	5.13349e-11	3.1219	1.49786	Asb14	protein_coding	ankyrin repeat and SOCS box-containing 14 [Source:MGI Symbol;Acc:MGI:2655107]
ENSMUSG00000027162	-0.967184	5.13948e-11	1.96422	0.980491	Lin7c	protein_coding	lin-7 homolog C (C. elegans) [Source:MGI Symbol;Acc:MGI:1330839]
ENSMUSG00000021193	-1.3351	5.16152e-11	2.18223	0.828125	Pitrm1	protein_coding	pitrilysin metallepetidase 1 [Source:MGI Symbol;Acc:MGI:1916867]
ENSMUSG00000029613	-0.490653	5.19485e-11	2.19635	1.69093	Eif2ak1	protein_coding	eukaryotic translation initiation factor 2 alpha kinase 1 [Source:MGI Symbol;Acc:MGI:1353448]
ENSMUSG00000079469	-1.2147	5.19485e-11	2.91377	1.67999	Pigb	protein_coding	phosphatidylinositol glycan anchor biosynthesis, class B [Source:MGI Symbol;Acc:MGI:1891825]
ENSMUSG00000021838	-1.85704	5.2463e-11	4.49005	2.60438	Samd4	protein_coding	sterile alpha motif domain containing 4 [Source:MGI Symbol;Acc:MGI:1921730]
ENSMUSG00000029207	-2.04032	5.2463e-11	2.71153	0.641569	Apbb2	protein_coding	amyloid beta (A4) precursor protein-binding, family B, member 2 [Source:MGI Symbol;Acc:MGI:108405]
ENSMUSG00000017760	-1.88557	5.2617e-11	4.06772	2.1568	Ctsa	protein_coding	cathepsin A [Source:MGI Symbol;Acc:MGI:97748]
ENSMUSG00000026610	-1.22686	5.26366e-11	1.73823	0.488601	Esrrg	protein_coding	estrogen-related receptor gamma [Source:MGI Symbol;Acc:MGI:1347056]
ENSMUSG00000033365	-1.09477	5.27398e-11	1.93113	0.823621	Ipo13	protein_coding	importin 13 [Source:MGI Symbol;Acc:MGI:2385205]
ENSMUSG00000026104	-1.31078	5.27398e-11	2.02169	0.687203	Stat1	protein_coding	signal transducer and activator of transcription 1 [Source:MGI Symbol;Acc:MGI:103063]
ENSMUSG00000019558	-1.86865	5.27398e-11	4.26009	2.3652	Slc6a8	protein_coding	solute carrier family 6 (neurotransmitter transporter, creatine), member 8 [Source:MGI Symbol;Acc:MGI:2147834]
ENSMUSG00000071604	-1.19895	5.28666e-11	2.46597	1.25092	Fam189a2	protein_coding	family with sequence similarity 189, member A2 [Source:MGI Symbol;Acc:MGI:2685813]
ENSMUSG00000019659	-1.0627	5.32354e-11	3.056	1.97341	Ccdc12	protein_coding	coiled-coil domain containing 12 [Source:MGI Symbol;Acc:MGI:1919904]
ENSMUSG00000069274	-1.19298	5.32354e-11	1.58385	0.373589	Hist1h4f	protein_coding	histone cluster 1, H4f [Source:MGI Symbol;Acc:MGI:2448425]
ENSMUSG00000002455	-0.824757	5.35885e-11	1.58665	0.745988	Prpf6	protein_coding	pre-mRNA splicing factor 6 [Source:MGI Symbol;Acc:MGI:1922946]
ENSMUSG00000028672	-1.45375	5.39915e-11	3.14256	1.6692	Hmgcl	protein_coding	3-hydroxy-3-methylglutaryl-Coenzyme A lyase [Source:MGI Symbol;Acc:MGI:96158]
ENSMUSG00000029176	-1.26847	5.42042e-11	2.03513	0.750457	Anapc4	protein_coding	anaphase promoting complex subunit 4 [Source:MGI Symbol;Acc:MGI:1098673]
ENSMUSG00000052296	-0.419862	5.4235e-11	1.5705	1.13994	Ppp6r1	protein_coding	protein phosphatase 6, regulatory subunit 1 [Source:MGI Symbol;Acc:MGI:2442163]
ENSMUSG00000035770	-0.823628	5.43796e-11	1.88423	1.0464	Dync1li2	protein_coding	dynein, cytoplasmic 1 light intermediate chain 2 [Source:MGI Symbol;Acc:MGI:107738]
ENSMUSG00000000355	-1.60044	5.43796e-11	2.79915	1.18305	Mcts1	protein_coding	malignant T cell amplified sequence 1 [Source:MGI Symbol;Acc:MGI:1916245]
ENSMUSG00000020290	-1.86162	5.43796e-11	2.65195	0.76652	Xpo1	protein_coding	exportin 1 [Source:MGI Symbol;Acc:MGI:2144013]
ENSMUSG00000112449	-1.28717	5.44303e-11	5.06477	3.73324	Srp54a	protein_coding	signal recognition particle 54A [Source:MGI Symbol;Acc:MGI:1346087]
ENSMUSG00000024949	-1.02989	5.4505e-11	2.33991	1.29158	Sf1	protein_coding	splicing factor 1 [Source:MGI Symbol;Acc:MGI:1095403]
ENSMUSG00000033128	-0.972755	5.46836e-11	1.79978	0.812244	Gga1	protein_coding	golgi associated, gamma adaptin ear containing, ARF binding protein 1 [Source:MGI Symbol;Acc:MGI:2146207]
ENSMUSG00000025613	-1.02224	5.5095e-11	4.67647	3.61527	Cct8	protein_coding	chaperonin containing Tcp1, subunit 8 (theta) [Source:MGI Symbol;Acc:MGI:107183]
ENSMUSG00000026812	-1.70577	5.51003e-11	2.14288	0.416295	Tsc1	protein_coding	tuberous sclerosis 1 [Source:MGI Symbol;Acc:MGI:1929183]
ENSMUSG00000030588	-1.21849	5.53857e-11	3.26442	2.0245	Yif1b	protein_coding	Yip1 interacting factor homolog B (S. cerevisiae) [Source:MGI Symbol;Acc:MGI:1924504]
ENSMUSG00000049470	-1.22963	5.60798e-11	2.36984	1.12309	Aff4	protein_coding	AF4/FMR2 family, member 4 [Source:MGI Symbol;Acc:MGI:2136171]
ENSMUSG00000038023	-0.962621	5.7334e-11	2.06168	1.08384	Atp6v0a2	protein_coding	ATPase, H+ transporting, lysosomal V0 subunit A2 [Source:MGI Symbol;Acc:MGI:104855]
ENSMUSG00000062169	-1.90064	5.7611e-11	3.78006	1.85523	Cnih4	protein_coding	cornichon family AMPA receptor auxiliary protein 4 [Source:MGI Symbol;Acc:MGI:1925828]
ENSMUSG00000020358	-1.57875	5.79105e-11	5.69446	4.06219	Hnrnpab	protein_coding	heterogeneous nuclear ribonucleoprotein A/B [Source:MGI Symbol;Acc:MGI:1330294]
ENSMUSG00000056952	-0.194269	5.84082e-11	1.02112	0.815874	Tatdn2	protein_coding	TatD DNase domain containing 2 [Source:MGI Symbol;Acc:MGI:3576210]
ENSMUSG00000032523	-1.81046	6.00563e-11	4.46817	2.62893	Hhatl	protein_coding	hedgehog acyltransferase-like [Source:MGI Symbol;Acc:MGI:1922020]
ENSMUSG00000040652	-1.24048	6.03703e-11	4.04245	2.77419	Oaz2	protein_coding	ornithine decarboxylase antizyme 2 [Source:MGI Symbol;Acc:MGI:109492]
ENSMUSG00000020610	-1.35628	6.05649e-11	3.7403	2.35988	Amz2	protein_coding	archaelysin family metallopeptidase 2 [Source:MGI Symbol;Acc:MGI:104837]
ENSMUSG00000026198	-0.834404	6.07027e-11	1.80991	0.960036	Abcb6	protein_coding	ATP-binding cassette, sub-family B (MDR/TAP), member 6 [Source:MGI Symbol;Acc:MGI:1921354]
ENSMUSG00000057572	-1.25271	6.07027e-11	1.76056	0.491523	Zbtb8os	protein_coding	zinc finger and BTB domain containing 8 opposite strand [Source:MGI Symbol;Acc:MGI:1914356]
ENSMUSG00000027165	-2.56588	6.11813e-11	6.20414	3.59981	B230118H07Rik	protein_coding	RIKEN cDNA B230118H07 gene [Source:MGI Symbol;Acc:MGI:1915420]
ENSMUSG00000079480	-1.00719	6.17752e-11	2.13461	1.11176	Pin4	protein_coding	protein (peptidyl-prolyl cis/trans isomerase) NIMA-interacting, 4 (parvulin) [Source:MGI Symbol;Acc:MGI:1916963]
ENSMUSG00000029993	-2.19074	6.17752e-11	5.42175	3.19625	Nfu1	protein_coding	NFU1 iron-sulfur cluster scaffold [Source:MGI Symbol;Acc:MGI:1913290]
ENSMUSG00000029823	-0.00857301	6.18477e-11	2.91809	2.89236	Luc7l2	protein_coding	LUC7-like 2 (S. cerevisiae) [Source:MGI Symbol;Acc:MGI:2183260]
ENSMUSG00000002393	-1.10708	6.23055e-11	2.17567	1.05312	Nr2f6	protein_coding	nuclear receptor subfamily 2, group F, member 6 [Source:MGI Symbol;Acc:MGI:1352453]
ENSMUSG00000045100	-1.13952	6.23055e-11	1.97183	0.818344	Slc25a26	protein_coding	solute carrier family 25 (mitochondrial carrier, phosphate carrier), member 26 [Source:MGI Symbol;Acc:MGI:1914832]
ENSMUSG00000026687	-0.208946	6.28444e-11	0.679168	0.451045	Aldh9a1	protein_coding	aldehyde dehydrogenase 9, subfamily A1 [Source:MGI Symbol;Acc:MGI:1861622]
ENSMUSG00000024387	-1.99525	6.35287e-11	4.07968	2.06094	Csnk2b	protein_coding	casein kinase 2, beta polypeptide [Source:MGI Symbol;Acc:MGI:88548]
ENSMUSG00000021792	-1.30685	6.40931e-11	2.48059	1.15513	Fam213a	protein_coding	family with sequence similarity 213, member A [Source:MGI Symbol;Acc:MGI:1917814]
ENSMUSG00000039782	-1.20088	6.41352e-11	1.96354	0.741342	Cpeb2	protein_coding	cytoplasmic polyadenylation element binding protein 2 [Source:MGI Symbol;Acc:MGI:2442640]
ENSMUSG00000027082	-1.68146	6.45716e-11	3.68068	1.97479	Tfpi	protein_coding	tissue factor pathway inhibitor [Source:MGI Symbol;Acc:MGI:1095418]
ENSMUSG00000021497	-1.38329	6.46237e-11	2.48364	1.08415	Txndc15	protein_coding	thioredoxin domain containing 15 [Source:MGI Symbol;Acc:MGI:1916922]
ENSMUSG00000083012	-2.10904	6.46668e-11	5.34786	3.20317	Fam220a	protein_coding	family with sequence similarity 220, member A [Source:MGI Symbol;Acc:MGI:1914488]
ENSMUSG00000071172	-1.16056	6.49058e-11	3.63276	2.44642	Srsf3	protein_coding	serine/arginine-rich splicing factor 3 [Source:MGI Symbol;Acc:MGI:98285]
ENSMUSG00000057604	-0.836754	6.50632e-11	2.27508	1.42185	Lmcd1	protein_coding	LIM and cysteine-rich domains 1 [Source:MGI Symbol;Acc:MGI:1353635]
ENSMUSG00000042109	-0.409999	6.54576e-11	1.41719	0.99568	Csdc2	protein_coding	cold shock domain containing C2, RNA binding [Source:MGI Symbol;Acc:MGI:2146027]
ENSMUSG00000025907	-1.69135	6.55745e-11	4.37836	2.65776	Rb1cc1	protein_coding	RB1-inducible coiled-coil 1 [Source:MGI Symbol;Acc:MGI:1341850]
ENSMUSG00000010175	-1.04779	6.59788e-11	2.9628	1.89559	Prox1	protein_coding	prospero homeobox 1 [Source:MGI Symbol;Acc:MGI:97772]
ENSMUSG00000020485	-1.17781	6.62218e-11	2.15669	0.964072	Supt4a	protein_coding	suppressor of Ty 4A [Source:MGI Symbol;Acc:MGI:107416]
ENSMUSG00000081534	-1.11954	6.72025e-11	2.22365	1.0882	Slc48a1	protein_coding	solute carrier family 48 (heme transporter), member 1 [Source:MGI Symbol;Acc:MGI:1914989]
ENSMUSG00000036698	-0.721616	6.8084e-11	1.71703	0.979617	Ago2	protein_coding	argonaute RISC catalytic subunit 2 [Source:MGI Symbol;Acc:MGI:2446632]
ENSMUSG00000024140	-1.32057	6.8084e-11	3.79419	2.44624	Epas1	protein_coding	endothelial PAS domain protein 1 [Source:MGI Symbol;Acc:MGI:109169]
ENSMUSG00000027405	-0.734675	6.90014e-11	1.2556	0.503929	Nop56	protein_coding	NOP56 ribonucleoprotein [Source:MGI Symbol;Acc:MGI:1914384]
ENSMUSG00000025364	-1.55003	6.95369e-11	2.59606	1.02717	Pa2g4	protein_coding	proliferation-associated 2G4 [Source:MGI Symbol;Acc:MGI:894684]
ENSMUSG00000051236	-1.37672	6.97748e-11	4.01633	2.61049	Msrb3	protein_coding	methionine sulfoxide reductase B3 [Source:MGI Symbol;Acc:MGI:2443538]
ENSMUSG00000024726	-1.56775	6.9836e-11	4.01314	2.41973	Carnmt1	protein_coding	carnosine N-methyltransferase 1 [Source:MGI Symbol;Acc:MGI:1914633]
ENSMUSG00000028284	-1.07171	7.04473e-11	2.7224	1.62886	Map3k7	protein_coding	mitogen-activated protein kinase kinase kinase 7 [Source:MGI Symbol;Acc:MGI:1346877]
ENSMUSG00000067194	-1.72266	7.04731e-11	4.20982	2.4603	Eif1ax	protein_coding	eukaryotic translation initiation factor 1A, X-linked [Source:MGI Symbol;Acc:MGI:1913485]
ENSMUSG00000040446	-1.20129	7.05182e-11	2.5261	1.30708	Rprd1a	protein_coding	regulation of nuclear pre-mRNA domain containing 1A [Source:MGI Symbol;Acc:MGI:2385066]
ENSMUSG00000050373	-1.17257	7.0849e-11	2.21314	1.02256	Snx21	protein_coding	sorting nexin family member 21 [Source:MGI Symbol;Acc:MGI:1917729]
ENSMUSG00000031879	-1.50114	7.10438e-11	3.12051	1.59707	Fam96b	protein_coding	family with sequence similarity 96, member B [Source:MGI Symbol;Acc:MGI:1915773]
ENSMUSG00000040269	-1.50988	7.13642e-11	3.87323	2.33803	Mrps28	protein_coding	mitochondrial ribosomal protein S28 [Source:MGI Symbol;Acc:MGI:1913480]
ENSMUSG00000090066	-1.23055	7.16979e-11	3.23407	1.9827	1110002E22Rik	protein_coding	RIKEN cDNA 1110002E22 gene [Source:MGI Symbol;Acc:MGI:1915066]
ENSMUSG00000015120	-1.48068	7.17034e-11	2.39366	0.887554	Ube2i	protein_coding	ubiquitin-conjugating enzyme E2I [Source:MGI Symbol;Acc:MGI:107365]
ENSMUSG00000000959	-1.25398	7.2086e-11	3.64672	2.36472	Oxa1l	protein_coding	oxidase assembly 1-like [Source:MGI Symbol;Acc:MGI:1916339]
ENSMUSG00000005534	-1.35218	7.26338e-11	3.59574	2.21975	Insr	protein_coding	insulin receptor [Source:MGI Symbol;Acc:MGI:96575]
ENSMUSG00000030890	-1.19506	7.31682e-11	2.07811	0.864255	Ilk	protein_coding	integrin linked kinase [Source:MGI Symbol;Acc:MGI:1195267]
ENSMUSG00000032478	-0.811464	7.33496e-11	1.65128	0.824143	Nme6	protein_coding	NME/NM23 nucleoside diphosphate kinase 6 [Source:MGI Symbol;Acc:MGI:1861676]
ENSMUSG00000017221	-1.13829	7.36352e-11	3.37385	2.21325	Psmd3	protein_coding	proteasome (prosome, macropain) 26S subunit, non-ATPase, 3 [Source:MGI Symbol;Acc:MGI:98858]
ENSMUSG00000027206	-2.07955	7.39822e-11	3.79407	1.69197	Cops2	protein_coding	COP9 signalosome subunit 2 [Source:MGI Symbol;Acc:MGI:1330276]
ENSMUSG00000019837	-1.54588	7.44745e-11	3.96926	2.39804	Gtf3c6	protein_coding	general transcription factor IIIC, polypeptide 6, alpha [Source:MGI Symbol;Acc:MGI:1914621]
ENSMUSG00000029703	-0.525552	7.48732e-11	2.2538	1.71454	Lrwd1	protein_coding	leucine-rich repeats and WD repeat domain containing 1 [Source:MGI Symbol;Acc:MGI:1918985]
ENSMUSG00000020978	-1.44866	7.52301e-11	3.34303	1.8738	Klhdc2	protein_coding	kelch domain containing 2 [Source:MGI Symbol;Acc:MGI:1916804]
ENSMUSG00000020439	-1.82184	7.65955e-11	3.8993	2.05234	Smtn	protein_coding	smoothelin [Source:MGI Symbol;Acc:MGI:1354727]
ENSMUSG00000028820	-1.39446	7.84024e-11	2.477	1.06592	Sfpq	protein_coding	splicing factor proline/glutamine rich (polypyrimidine tract binding protein associated) [Source:MGI Symbol;Acc:MGI:1918764]
ENSMUSG00000089901	0.028818	7.88829e-11	0.704525	0.729125	Gm8113	protein_coding	predicted gene 8113 [Source:MGI Symbol;Acc:MGI:3648791]
ENSMUSG00000064181	-1.32244	7.88829e-11	4.17054	2.81914	Rab3ip	protein_coding	RAB3A interacting protein [Source:MGI Symbol;Acc:MGI:105933]
ENSMUSG00000091512	-1.45883	7.91496e-11	3.44523	1.965	Lamtor3	protein_coding	late endosomal/lysosomal adaptor, MAPK and MTOR activator 3 [Source:MGI Symbol;Acc:MGI:1929467]
ENSMUSG00000029175	-0.989567	7.91664e-11	2.23545	1.23077	Slc35f6	protein_coding	solute carrier family 35, member F6 [Source:MGI Symbol;Acc:MGI:1922169]
ENSMUSG00000017713	-0.638807	8.02026e-11	0.847049	0.187715	Tha1	protein_coding	threonine aldolase 1 [Source:MGI Symbol;Acc:MGI:1919026]
ENSMUSG00000098374	-0.814297	8.04681e-11	1.00042	0.155154	Gm28043	protein_coding	predicted gene, 28043 [Source:MGI Symbol;Acc:MGI:5547779]
ENSMUSG00000034880	-1.38827	8.04681e-11	3.9635	2.54787	Mrpl34	protein_coding	mitochondrial ribosomal protein L34 [Source:MGI Symbol;Acc:MGI:2137227]
ENSMUSG00000031958	-0.729462	8.06786e-11	1.20155	0.458109	Ldhd	protein_coding	lactate dehydrogenase D [Source:MGI Symbol;Acc:MGI:106428]
ENSMUSG00000037470	-0.67984	8.09683e-11	1.66191	0.966774	Uggt1	protein_coding	UDP-glucose glycoprotein glucosyltransferase 1 [Source:MGI Symbol;Acc:MGI:2443162]
ENSMUSG00000045948	-1.66179	8.12328e-11	4.56392	2.87101	Mrps12	protein_coding	mitochondrial ribosomal protein S12 [Source:MGI Symbol;Acc:MGI:1346333]
ENSMUSG00000019872	-1.39184	8.20084e-11	2.74198	1.33299	Smpdl3a	protein_coding	sphingomyelin phosphodiesterase, acid-like 3A [Source:MGI Symbol;Acc:MGI:1931437]
ENSMUSG00000030286	-1.17545	8.21052e-11	2.57061	1.37885	Emc3	protein_coding	ER membrane protein complex subunit 3 [Source:MGI Symbol;Acc:MGI:1913337]
ENSMUSG00000021585	-2.31919	8.24899e-11	6.77584	4.40317	Cast	protein_coding	calpastatin [Source:MGI Symbol;Acc:MGI:1098236]
ENSMUSG00000028961	-0.0611268	8.2544e-11	0.674015	0.600485	Pgd	protein_coding	phosphogluconate dehydrogenase [Source:MGI Symbol;Acc:MGI:97553]
ENSMUSG00000075595	-0.977619	8.27302e-11	1.95794	0.961412	Zfp652	protein_coding	zinc finger protein 652 [Source:MGI Symbol;Acc:MGI:2442221]
ENSMUSG00000042444	-1.75073	8.27302e-11	3.41259	1.64065	Mindy2	protein_coding	MINDY lysine 48 deubiquitinase 2 [Source:MGI Symbol;Acc:MGI:2443086]
ENSMUSG00000020056	-1.21713	8.30667e-11	2.21829	0.979861	Washc3	protein_coding	WASH complex subunit 3 [Source:MGI Symbol;Acc:MGI:1914532]
ENSMUSG00000028690	-0.876169	8.33808e-11	2.22087	1.32907	Mmachc	protein_coding	methylmalonic aciduria cblC type, with homocystinuria [Source:MGI Symbol;Acc:MGI:1914346]
ENSMUSG00000039285	-1.27978	8.33808e-11	3.36973	2.06823	Azi2	protein_coding	5-azacytidine induced gene 2 [Source:MGI Symbol;Acc:MGI:1351332]
ENSMUSG00000002844	-0.653961	8.37082e-11	1.58252	0.913878	Adprh	protein_coding	ADP-ribosylarginine hydrolase [Source:MGI Symbol;Acc:MGI:1098234]
ENSMUSG00000026095	-1.30381	8.38663e-11	4.61852	3.27731	Asnsd1	protein_coding	asparagine synthetase domain containing 1 [Source:MGI Symbol;Acc:MGI:1917646]
ENSMUSG00000027708	-1.79957	8.41555e-11	3.5772	1.75425	Dcun1d1	protein_coding	DCN1, defective in cullin neddylation 1, domain containing 1 (S. cerevisiae) [Source:MGI Symbol;Acc:MGI:2150386]
ENSMUSG00000033004	-1.16625	8.44068e-11	2.24298	1.05823	Mycbp2	protein_coding	MYC binding protein 2 [Source:MGI Symbol;Acc:MGI:2179432]
ENSMUSG00000001666	-1.4723	8.50406e-11	4.16884	2.66975	Ddt	protein_coding	D-dopachrome tautomerase [Source:MGI Symbol;Acc:MGI:1298381]
ENSMUSG00000078887	-0.686089	8.57437e-11	1.04589	0.344879	Gm6710	protein_coding	predicted gene 6710 [Source:MGI Symbol;Acc:MGI:3779623]
ENSMUSG00000021361	-1.37576	8.58706e-11	4.18844	2.78122	Tmem14c	protein_coding	transmembrane protein 14C [Source:MGI Symbol;Acc:MGI:1913404]
ENSMUSG00000043424	-1.14247	8.59072e-11	4.11519	2.9419	Eif3j2	protein_coding	eukaryotic translation initiation factor 3, subunit J2 [Source:MGI Symbol;Acc:MGI:3704486]
ENSMUSG00000021993	-0.902982	8.66943e-11	2.87108	1.94963	Mipep	protein_coding	mitochondrial intermediate peptidase [Source:MGI Symbol;Acc:MGI:1917728]
ENSMUSG00000037622	-1.13771	8.69499e-11	1.84135	0.689455	Wdtc1	protein_coding	WD and tetratricopeptide repeats 1 [Source:MGI Symbol;Acc:MGI:2685541]
ENSMUSG00000039218	-1.61545	8.76468e-11	3.83052	2.19105	Srrm2	protein_coding	serine/arginine repetitive matrix 2 [Source:MGI Symbol;Acc:MGI:1923206]
ENSMUSG00000022564	-0.460944	8.85672e-11	1.45777	0.985943	Grina	protein_coding	glutamate receptor, ionotropic, N-methyl D-aspartate-associated protein 1 (glutamate binding) [Source:MGI Symbol;Acc:MGI:1913418]
ENSMUSG00000030589	-1.04451	8.87908e-11	1.23875	0.160298	Rasgrp4	protein_coding	RAS guanyl releasing protein 4 [Source:MGI Symbol;Acc:MGI:2386851]
ENSMUSG00000028798	-1.37326	8.93557e-11	3.24885	1.85523	Eif3i	protein_coding	eukaryotic translation initiation factor 3, subunit I [Source:MGI Symbol;Acc:MGI:1860763]
ENSMUSG00000040713	-1.89768	8.94032e-11	4.88023	2.95016	Creg1	protein_coding	cellular repressor of E1A-stimulated genes 1 [Source:MGI Symbol;Acc:MGI:1344382]
ENSMUSG00000045503	-1.43245	8.96772e-11	2.60475	1.15253	Sys1	protein_coding	SYS1 Golgi-localized integral membrane protein homolog (S. cerevisiae) [Source:MGI Symbol;Acc:MGI:1913710]
ENSMUSG00000032177	-0.51767	8.99294e-11	2.21988	1.68744	Pde4a	protein_coding	phosphodiesterase 4A, cAMP specific [Source:MGI Symbol;Acc:MGI:99558]
ENSMUSG00000027433	-1.20407	9.02929e-11	2.17147	0.950389	Xrn2	protein_coding	5'-3' exoribonuclease 2 [Source:MGI Symbol;Acc:MGI:894687]
ENSMUSG00000001794	-1.9777	9.02929e-11	6.2018	4.17421	Capns1	protein_coding	calpain, small subunit 1 [Source:MGI Symbol;Acc:MGI:88266]
ENSMUSG00000056851	-2.3992	9.02929e-11	6.18493	3.7518	Pcbp2	protein_coding	poly(rC) binding protein 2 [Source:MGI Symbol;Acc:MGI:108202]
ENSMUSG00000030352	-0.658665	9.06588e-11	1.76434	1.09085	Tspan9	protein_coding	tetraspanin 9 [Source:MGI Symbol;Acc:MGI:1924558]
ENSMUSG00000029547	-0.99288	9.08343e-11	2.06472	1.05583	Ints1	protein_coding	integrator complex subunit 1 [Source:MGI Symbol;Acc:MGI:1915760]
ENSMUSG00000023156	-1.19826	9.08939e-11	1.97231	0.757557	Rpp14	protein_coding	ribonuclease P 14 subunit [Source:MGI Symbol;Acc:MGI:1914303]
ENSMUSG00000019854	-0.846076	9.10925e-11	1.98553	1.12017	Reps1	protein_coding	RalBP1 associated Eps domain containing protein [Source:MGI Symbol;Acc:MGI:1196373]
ENSMUSG00000016495	-1.27199	9.13832e-11	2.50152	1.20858	Plgrkt	protein_coding	plasminogen receptor, C-terminal lysine transmembrane protein [Source:MGI Symbol;Acc:MGI:1915009]
ENSMUSG00000019432	-0.748334	9.26437e-11	1.91226	1.14888	Ddx39b	protein_coding	DEAD (Asp-Glu-Ala-Asp) box polypeptide 39B [Source:MGI Symbol;Acc:MGI:99240]
ENSMUSG00000026014	-1.36485	9.4306e-11	2.7573	1.37355	Raph1	protein_coding	Ras association (RalGDS/AF-6) and pleckstrin homology domains 1 [Source:MGI Symbol;Acc:MGI:1924550]
ENSMUSG00000021079	-1.55874	9.44363e-11	2.65478	1.07544	Timm9	protein_coding	translocase of inner mitochondrial membrane 9 [Source:MGI Symbol;Acc:MGI:1353436]
ENSMUSG00000019838	-0.704532	9.45196e-11	1.17776	0.454906	Slc16a10	protein_coding	solute carrier family 16 (monocarboxylic acid transporters), member 10 [Source:MGI Symbol;Acc:MGI:1919722]
ENSMUSG00000030161	-0.948307	9.45196e-11	2.86703	1.90034	Gabarapl1	protein_coding	gamma-aminobutyric acid (GABA) A receptor-associated protein-like 1 [Source:MGI Symbol;Acc:MGI:1914980]
ENSMUSG00000040414	-0.8693	9.52291e-11	1.26933	0.384141	Slc25a28	protein_coding	solute carrier family 25, member 28 [Source:MGI Symbol;Acc:MGI:2180509]
ENSMUSG00000005686	-0.350632	9.62845e-11	1.42321	1.05828	Ampd3	protein_coding	adenosine monophosphate deaminase 3 [Source:MGI Symbol;Acc:MGI:1096344]
ENSMUSG00000020694	-2.03625	9.68711e-11	3.46293	1.40327	Tlk2	protein_coding	tousled-like kinase 2 (Arabidopsis) [Source:MGI Symbol;Acc:MGI:1346023]
ENSMUSG00000051671	-1.30529	9.74905e-11	2.20124	0.875788	Coa6	protein_coding	cytochrome c oxidase assembly factor 6 [Source:MGI Symbol;Acc:MGI:1915142]
ENSMUSG00000032030	-2.10933	9.8108e-11	4.52032	2.38297	Cul5	protein_coding	cullin 5 [Source:MGI Symbol;Acc:MGI:1922967]
ENSMUSG00000027804	-1.26677	9.8277e-11	3.03874	1.75293	Ppid	protein_coding	peptidylprolyl isomerase D (cyclophilin D) [Source:MGI Symbol;Acc:MGI:1914988]
ENSMUSG00000039879	-0.836971	9.85474e-11	1.82752	0.97429	Heca	protein_coding	hdc homolog, cell cycle regulator [Source:MGI Symbol;Acc:MGI:2685715]
ENSMUSG00000029486	-1.67268	9.85474e-11	3.91457	2.21749	Mrpl1	protein_coding	mitochondrial ribosomal protein L1 [Source:MGI Symbol;Acc:MGI:2137202]
ENSMUSG00000022800	-1.7514	9.90884e-11	4.7542	2.9691	Fyttd1	protein_coding	forty-two-three domain containing 1 [Source:MGI Symbol;Acc:MGI:1917955]
ENSMUSG00000026516	-0.4039	9.97422e-11	0.738675	0.312504	Nvl	protein_coding	nuclear VCP-like [Source:MGI Symbol;Acc:MGI:1914709]
ENSMUSG00000056121	-1.74732	1.0063e-10	3.47221	1.70266	Fez2	protein_coding	fasciculation and elongation protein zeta 2 (zygin II) [Source:MGI Symbol;Acc:MGI:2675856]
ENSMUSG00000022617	-0.899649	1.01037e-10	1.43566	0.521521	Chkb	protein_coding	choline kinase beta [Source:MGI Symbol;Acc:MGI:1328313]
ENSMUSG00000060802	-0.513601	1.01526e-10	1.90238	1.37461	B2m	protein_coding	beta-2 microglobulin [Source:MGI Symbol;Acc:MGI:88127]
ENSMUSG00000061360	-0.89018	1.01526e-10	1.63387	0.729485	Phf5a	protein_coding	PHD finger protein 5A [Source:MGI Symbol;Acc:MGI:2156864]
ENSMUSG00000034024	-1.0495	1.01809e-10	4.23918	3.15791	Cct2	protein_coding	chaperonin containing Tcp1, subunit 2 (beta) [Source:MGI Symbol;Acc:MGI:107186]
ENSMUSG00000032239	-1.79976	1.01809e-10	3.85789	2.03421	Rp9	protein_coding	retinitis pigmentosa 9 (human) [Source:MGI Symbol;Acc:MGI:2157166]
ENSMUSG00000030680	-1.10071	1.02554e-10	2.17909	1.06004	Pagr1a	protein_coding	PAXIP1 associated glutamate rich protein 1A [Source:MGI Symbol;Acc:MGI:1914528]
ENSMUSG00000026922	-1.35218	1.03025e-10	3.20988	1.83785	Agpat2	protein_coding	1-acylglycerol-3-phosphate O-acyltransferase 2 (lysophosphatidic acid acyltransferase, beta) [Source:MGI Symbol;Acc:MGI:1914762]
ENSMUSG00000071637	-0.469969	1.0323e-10	0.776914	0.293659	Cebpd	protein_coding	CCAAT/enhancer binding protein (C/EBP), delta [Source:MGI Symbol;Acc:MGI:103573]
ENSMUSG00000020644	-1.10645	1.04165e-10	2.53744	1.41239	Id2	protein_coding	inhibitor of DNA binding 2 [Source:MGI Symbol;Acc:MGI:96397]
ENSMUSG00000037740	-1.02261	1.04239e-10	2.99886	1.95661	Mrps26	protein_coding	mitochondrial ribosomal protein S26 [Source:MGI Symbol;Acc:MGI:1333830]
ENSMUSG00000031634	-0.625547	1.04427e-10	1.63865	0.996469	Ufsp2	protein_coding	UFM1-specific peptidase 2 [Source:MGI Symbol;Acc:MGI:1913679]
ENSMUSG00000027823	-0.873437	1.04427e-10	2.75745	1.86593	Gmps	protein_coding	guanine monophosphate synthetase [Source:MGI Symbol;Acc:MGI:2448526]
ENSMUSG00000031600	-0.833677	1.05894e-10	2.0651	1.21639	Vps37a	protein_coding	vacuolar protein sorting 37A [Source:MGI Symbol;Acc:MGI:1261835]
ENSMUSG00000041571	-0.489079	1.06093e-10	1.90621	1.40526	Selenow	protein_coding	selenoprotein W [Source:MGI Symbol;Acc:MGI:1100878]
ENSMUSG00000031790	-0.619271	1.0641e-10	1.8693	1.23707	Mmp15	protein_coding	matrix metallopeptidase 15 [Source:MGI Symbol;Acc:MGI:109320]
ENSMUSG00000036687	-0.456089	1.0719e-10	1.25443	0.784759	Tmem184a	protein_coding	transmembrane protein 184a [Source:MGI Symbol;Acc:MGI:2385897]
ENSMUSG00000037361	-0.590553	1.0719e-10	1.62902	1.02327	Sf3b6	protein_coding	splicing factor 3B, subunit 6 [Source:MGI Symbol;Acc:MGI:1913305]
ENSMUSG00000017548	-1.501	1.08857e-10	2.14279	0.619204	Suz12	protein_coding	suppressor of zeste 12 homolog (Drosophila) [Source:MGI Symbol;Acc:MGI:1261758]
ENSMUSG00000040859	-0.609949	1.09005e-10	1.28373	0.661473	Bsdc1	protein_coding	BSD domain containing 1 [Source:MGI Symbol;Acc:MGI:1913466]
ENSMUSG00000042747	-1.31918	1.1e-10	3.70378	2.36089	Krtcap2	protein_coding	keratinocyte associated protein 2 [Source:MGI Symbol;Acc:MGI:1913309]
ENSMUSG00000001829	-1.83574	1.10092e-10	3.83938	1.98121	Clpb	protein_coding	ClpB caseinolytic peptidase B [Source:MGI Symbol;Acc:MGI:1100517]
ENSMUSG00000079508	-2.15605	1.10092e-10	6.58431	4.37621	Apoo	protein_coding	apolipoprotein O [Source:MGI Symbol;Acc:MGI:1915566]
ENSMUSG00000027536	-0.850253	1.10239e-10	1.55493	0.688372	Chmp4c	protein_coding	charged multivesicular body protein 4C [Source:MGI Symbol;Acc:MGI:1913621]
ENSMUSG00000069601	-1.90477	1.11938e-10	3.77971	1.85075	Ank3	protein_coding	ankyrin 3, epithelial [Source:MGI Symbol;Acc:MGI:88026]
ENSMUSG00000032435	-1.04097	1.13353e-10	3.4938	2.42818	Dync1li1	protein_coding	dynein cytoplasmic 1 light intermediate chain 1 [Source:MGI Symbol;Acc:MGI:2135610]
ENSMUSG00000043079	-1.38485	1.15881e-10	3.73582	2.32735	Synpo	protein_coding	synaptopodin [Source:MGI Symbol;Acc:MGI:1099446]
ENSMUSG00000071540	-1.36794	1.17066e-10	3.85279	2.45821	3425401B19Rik	protein_coding	RIKEN cDNA 3425401B19 gene [Source:MGI Symbol;Acc:MGI:3588196]
ENSMUSG00000024073	-1.56844	1.17482e-10	3.42719	1.83517	Birc6	protein_coding	baculoviral IAP repeat-containing 6 [Source:MGI Symbol;Acc:MGI:1276108]
ENSMUSG00000046792	-0.599084	1.18704e-10	1.36977	0.754677	Zfp787	protein_coding	zinc finger protein 787 [Source:MGI Symbol;Acc:MGI:1914359]
ENSMUSG00000057762	-0.455154	1.1909e-10	1.29799	0.829584	Gm6169	protein_coding	predicted gene 6169 [Source:MGI Symbol;Acc:MGI:3646298]
ENSMUSG00000028792	-1.53	1.19107e-10	3.28079	1.73067	Ak2	protein_coding	adenylate kinase 2 [Source:MGI Symbol;Acc:MGI:87978]
ENSMUSG00000026851	-0.541539	1.20604e-10	0.997632	0.440941	BC005624	protein_coding	cDNA sequence BC005624 [Source:MGI Symbol;Acc:MGI:2385132]
ENSMUSG00000023336	-0.588745	1.20604e-10	0.976679	0.371306	Wfdc1	protein_coding	WAP four-disulfide core domain 1 [Source:MGI Symbol;Acc:MGI:1915116]
ENSMUSG00000026939	-0.963399	1.21584e-10	2.49633	1.5163	Tmem141	protein_coding	transmembrane protein 141 [Source:MGI Symbol;Acc:MGI:1098773]
ENSMUSG00000040681	-1.44552	1.21935e-10	3.20159	1.73687	Hmgn1	protein_coding	high mobility group nucleosomal binding domain 1 [Source:MGI Symbol;Acc:MGI:96120]
ENSMUSG00000048755	-0.946843	1.22937e-10	2.65649	1.69253	Mcat	protein_coding	malonyl CoA:ACP acyltransferase (mitochondrial) [Source:MGI Symbol;Acc:MGI:2388651]
ENSMUSG00000015013	-1.10549	1.23119e-10	3.45172	2.32316	Trappc2l	protein_coding	trafficking protein particle complex 2-like [Source:MGI Symbol;Acc:MGI:1916295]
ENSMUSG00000031808	-0.81089	1.23847e-10	2.5568	1.72901	Slc27a1	protein_coding	solute carrier family 27 (fatty acid transporter), member 1 [Source:MGI Symbol;Acc:MGI:1347098]
ENSMUSG00000031392	-1.51542	1.23847e-10	3.37158	1.83472	Irak1	protein_coding	interleukin-1 receptor-associated kinase 1 [Source:MGI Symbol;Acc:MGI:107420]
ENSMUSG00000003199	-1.81261	1.24487e-10	3.81355	1.9785	Mpnd	protein_coding	MPN domain containing [Source:MGI Symbol;Acc:MGI:1915297]
ENSMUSG00000032673	-0.574698	1.25058e-10	2.00453	1.41465	Prorsd1	protein_coding	prolyl-tRNA synthetase domain containing 1 [Source:MGI Symbol;Acc:MGI:1915189]
ENSMUSG00000025139	-0.704149	1.26096e-10	1.78764	1.0682	Tollip	protein_coding	toll interacting protein [Source:MGI Symbol;Acc:MGI:1891808]
ENSMUSG00000021072	-1.36344	1.26096e-10	2.62859	1.24782	Tmx1	protein_coding	thioredoxin-related transmembrane protein 1 [Source:MGI Symbol;Acc:MGI:1919986]
ENSMUSG00000062619	-1.01599	1.26295e-10	2.37806	1.3454	2310039H08Rik	protein_coding	RIKEN cDNA 2310039H08 gene [Source:MGI Symbol;Acc:MGI:1914351]
ENSMUSG00000040964	-1.58486	1.26487e-10	4.35519	2.74265	Arhgef10l	protein_coding	Rho guanine nucleotide exchange factor (GEF) 10-like [Source:MGI Symbol;Acc:MGI:1920004]
ENSMUSG00000073876	-0.700981	1.26555e-10	1.28603	0.57153	Gm13305	protein_coding	predicted gene 13305 [Source:MGI Symbol;Acc:MGI:3801997]
ENSMUSG00000048087	-0.569192	1.27694e-10	1.41042	0.82715	Gm4737	protein_coding	predicted gene 4737 [Source:MGI Symbol;Acc:MGI:3643647]
ENSMUSG00000024410	-0.823135	1.27694e-10	0.905527	0.0653182	3110002H16Rik	protein_coding	RIKEN cDNA 3110002H16 gene [Source:MGI Symbol;Acc:MGI:1916528]
ENSMUSG00000018340	-1.55934	1.27694e-10	3.22977	1.65099	Anxa6	protein_coding	annexin A6 [Source:MGI Symbol;Acc:MGI:88255]
ENSMUSG00000003923	-1.43237	1.27827e-10	3.07456	1.62269	Tfam	protein_coding	transcription factor A, mitochondrial [Source:MGI Symbol;Acc:MGI:107810]
ENSMUSG00000046756	-1.23478	1.28068e-10	4.35484	3.08013	Mrps7	protein_coding	mitchondrial ribosomal protein S7 [Source:MGI Symbol;Acc:MGI:1354367]
ENSMUSG00000048264	-0.782153	1.28791e-10	2.08602	1.28913	Dip2c	protein_coding	disco interacting protein 2 homolog C [Source:MGI Symbol;Acc:MGI:1920179]
ENSMUSG00000007777	-0.98179	1.28791e-10	2.53899	1.53697	0610009B22Rik	protein_coding	RIKEN cDNA 0610009B22 gene [Source:MGI Symbol;Acc:MGI:1913300]
ENSMUSG00000020069	-1.68645	1.28791e-10	2.88719	1.18168	Hnrnph3	protein_coding	heterogeneous nuclear ribonucleoprotein H3 [Source:MGI Symbol;Acc:MGI:1926462]
ENSMUSG00000019822	-0.561184	1.29271e-10	1.4915	0.915909	Smpd2	protein_coding	sphingomyelin phosphodiesterase 2, neutral [Source:MGI Symbol;Acc:MGI:1278330]
ENSMUSG00000096210	-1.26653	1.29505e-10	2.87186	1.58716	H1f0	protein_coding	H1 histone family, member 0 [Source:MGI Symbol;Acc:MGI:95893]
ENSMUSG00000035203	-0.781272	1.29641e-10	3.19986	2.3985	Epn1	protein_coding	epsin 1 [Source:MGI Symbol;Acc:MGI:1333763]
ENSMUSG00000033526	-0.999642	1.29641e-10	2.55084	1.53244	Ppip5k1	protein_coding	diphosphoinositol pentakisphosphate kinase 1 [Source:MGI Symbol;Acc:MGI:2443281]
ENSMUSG00000020003	-0.646857	1.29674e-10	2.19984	1.53746	Pex7	protein_coding	peroxisomal biogenesis factor 7 [Source:MGI Symbol;Acc:MGI:1321392]
ENSMUSG00000038683	-1.12892	1.29876e-10	2.15591	1.01174	Pak1ip1	protein_coding	PAK1 interacting protein 1 [Source:MGI Symbol;Acc:MGI:1915333]
ENSMUSG00000032046	-1.06184	1.30395e-10	1.84782	0.771928	Abhd12	protein_coding	abhydrolase domain containing 12 [Source:MGI Symbol;Acc:MGI:1923442]
ENSMUSG00000025809	-1.59574	1.30399e-10	4.52864	2.89985	Itgb1	protein_coding	integrin beta 1 (fibronectin receptor beta) [Source:MGI Symbol;Acc:MGI:96610]
ENSMUSG00000029208	-1.57437	1.30478e-10	2.81322	1.22085	Guf1	protein_coding	GUF1 homolog, GTPase [Source:MGI Symbol;Acc:MGI:2140726]
ENSMUSG00000024782	-1.06514	1.30869e-10	3.32289	2.2364	Ak3	protein_coding	adenylate kinase 3 [Source:MGI Symbol;Acc:MGI:1860835]
ENSMUSG00000030530	-1.08285	1.31346e-10	2.33354	1.23414	Furin	protein_coding	furin (paired basic amino acid cleaving enzyme) [Source:MGI Symbol;Acc:MGI:97513]
ENSMUSG00000028367	-0.866384	1.31978e-10	3.03537	2.14975	Txn1	protein_coding	thioredoxin 1 [Source:MGI Symbol;Acc:MGI:98874]
ENSMUSG00000025016	-1.36003	1.34177e-10	2.72503	1.3478	Tm9sf3	protein_coding	transmembrane 9 superfamily member 3 [Source:MGI Symbol;Acc:MGI:1914262]
ENSMUSG00000109378	-0.924754	1.34208e-10	2.00612	1.0651	U2af1l4	protein_coding	U2 small nuclear RNA auxiliary factor 1-like 4 [Source:MGI Symbol;Acc:MGI:2678374]
ENSMUSG00000001440	-0.91078	1.3604e-10	2.60231	1.67464	Kpnb1	protein_coding	karyopherin (importin) beta 1 [Source:MGI Symbol;Acc:MGI:107532]
ENSMUSG00000003166	-1.32387	1.3761e-10	2.10844	0.76234	Dgcr2	protein_coding	DiGeorge syndrome critical region gene 2 [Source:MGI Symbol;Acc:MGI:892866]
ENSMUSG00000026353	-1.1844	1.3839e-10	3.73962	2.53182	Ubxn4	protein_coding	UBX domain protein 4 [Source:MGI Symbol;Acc:MGI:1915062]
ENSMUSG00000016541	-0.90297	1.38845e-10	3.24038	2.31519	Atxn10	protein_coding	ataxin 10 [Source:MGI Symbol;Acc:MGI:1859293]
ENSMUSG00000026277	-1.04247	1.38902e-10	2.57862	1.5185	Stk25	protein_coding	serine/threonine kinase 25 (yeast) [Source:MGI Symbol;Acc:MGI:1891699]
ENSMUSG00000038059	-0.630789	1.39739e-10	1.083	0.436233	Smim3	protein_coding	small integral membrane protein 3 [Source:MGI Symbol;Acc:MGI:1917088]
ENSMUSG00000029363	-1.44092	1.4452e-10	3.76829	2.30348	Rfc5	protein_coding	replication factor C (activator 1) 5 [Source:MGI Symbol;Acc:MGI:1919401]
ENSMUSG00000040760	-0.620354	1.4514e-10	1.73506	1.09969	Appl1	protein_coding	adaptor protein, phosphotyrosine interaction, PH domain and leucine zipper containing 1 [Source:MGI Symbol;Acc:MGI:1920243]
ENSMUSG00000030007	-1.63331	1.45284e-10	4.25989	2.5996	Cct7	protein_coding	chaperonin containing Tcp1, subunit 7 (eta) [Source:MGI Symbol;Acc:MGI:107184]
ENSMUSG00000054469	-1.38451	1.46025e-10	3.62542	2.21791	Lclat1	protein_coding	lysocardiolipin acyltransferase 1 [Source:MGI Symbol;Acc:MGI:2684937]
ENSMUSG00000037331	-1.85754	1.46075e-10	3.42046	1.54247	Larp1	protein_coding	La ribonucleoprotein domain family, member 1 [Source:MGI Symbol;Acc:MGI:1890165]
ENSMUSG00000020397	-1.24303	1.4704e-10	2.15715	0.891101	Med7	protein_coding	mediator complex subunit 7 [Source:MGI Symbol;Acc:MGI:1913463]
ENSMUSG00000028247	-0.977975	1.47378e-10	2.32625	1.33166	Coq3	protein_coding	coenzyme Q3 methyltransferase [Source:MGI Symbol;Acc:MGI:101813]
ENSMUSG00000027612	-0.993074	1.47378e-10	2.21467	1.20453	Mmp24	protein_coding	matrix metallopeptidase 24 [Source:MGI Symbol;Acc:MGI:1341867]
ENSMUSG00000035569	-1.42276	1.49035e-10	4.1846	2.73622	Ankrd11	protein_coding	ankyrin repeat domain 11 [Source:MGI Symbol;Acc:MGI:1924337]
ENSMUSG00000028443	-1.33255	1.51377e-10	2.11012	0.763231	Nudt2	protein_coding	nudix (nucleoside diphosphate linked moiety X)-type motif 2 [Source:MGI Symbol;Acc:MGI:1913651]
ENSMUSG00000021711	-1.07774	1.51561e-10	2.47095	1.3719	Trappc13	protein_coding	trafficking protein particle complex 13 [Source:MGI Symbol;Acc:MGI:1914225]
ENSMUSG00000036990	-1.7241	1.52262e-10	2.7462	1.00332	Otud4	protein_coding	OTU domain containing 4 [Source:MGI Symbol;Acc:MGI:1098801]
ENSMUSG00000071659	-1.07945	1.52308e-10	2.40052	1.30525	Hnrnpul2	protein_coding	heterogeneous nuclear ribonucleoprotein U-like 2 [Source:MGI Symbol;Acc:MGI:1915943]
ENSMUSG00000028398	-0.738464	1.5267e-10	2.48532	1.73084	Dmac1	protein_coding	distal membrane arm assembly complex 1 [Source:MGI Symbol;Acc:MGI:1914178]
ENSMUSG00000029036	-0.895996	1.53516e-10	2.23912	1.32781	Atad3a	protein_coding	ATPase family, AAA domain containing 3A [Source:MGI Symbol;Acc:MGI:1919214]
ENSMUSG00000044627	-0.932697	1.53601e-10	4.48514	3.51944	Swi5	protein_coding	SWI5 recombination repair homolog (yeast) [Source:MGI Symbol;Acc:MGI:1920181]
ENSMUSG00000038280	-0.627948	1.55147e-10	1.78547	1.14382	Ostm1	protein_coding	osteopetrosis associated transmembrane protein 1 [Source:MGI Symbol;Acc:MGI:2655574]
ENSMUSG00000051373	-0.397932	1.55529e-10	1.33055	0.918831	Plpp7	protein_coding	phospholipid phosphatase 7 (inactive) [Source:MGI Symbol;Acc:MGI:2445183]
ENSMUSG00000043183	-0.500591	1.56234e-10	1.12237	0.61055	Simc1	protein_coding	SUMO-interacting motifs containing 1 [Source:MGI Symbol;Acc:MGI:2442599]
ENSMUSG00000039166	-1.09806	1.56234e-10	1.93266	0.820626	Akap7	protein_coding	A kinase (PRKA) anchor protein 7 [Source:MGI Symbol;Acc:MGI:1859150]
ENSMUSG00000030605	-1.25324	1.56234e-10	3.17222	1.89903	Mfge8	protein_coding	milk fat globule-EGF factor 8 protein [Source:MGI Symbol;Acc:MGI:102768]
ENSMUSG00000069744	-1.33644	1.56234e-10	4.19301	2.82751	Psmb3	protein_coding	proteasome (prosome, macropain) subunit, beta type 3 [Source:MGI Symbol;Acc:MGI:1347014]
ENSMUSG00000025971	-0.673349	1.57264e-10	2.13436	1.44658	Maip1	protein_coding	matrix AAA peptidase interacting protein 1 [Source:MGI Symbol;Acc:MGI:1915365]
ENSMUSG00000058254	-1.31056	1.57978e-10	2.71511	1.38613	Tspan7	protein_coding	tetraspanin 7 [Source:MGI Symbol;Acc:MGI:1298407]
ENSMUSG00000062373	-1.70767	1.57978e-10	5.14966	3.39924	Tmem65	protein_coding	transmembrane protein 65 [Source:MGI Symbol;Acc:MGI:1922118]
ENSMUSG00000021033	-1.06748	1.63027e-10	2.47698	1.39387	Gstz1	protein_coding	glutathione transferase zeta 1 (maleylacetoacetate isomerase) [Source:MGI Symbol;Acc:MGI:1341859]
ENSMUSG00000070972	-1.04774	1.63168e-10	2.01528	0.950403	Dnajc25	protein_coding	DnaJ heat shock protein family (Hsp40) member C25 [Source:MGI Symbol;Acc:MGI:1919679]
ENSMUSG00000025580	-0.561036	1.63931e-10	1.85452	1.27966	Eif4a3	protein_coding	eukaryotic translation initiation factor 4A3 [Source:MGI Symbol;Acc:MGI:1923731]
ENSMUSG00000034312	-1.29325	1.64477e-10	3.42269	2.10796	Iqsec1	protein_coding	IQ motif and Sec7 domain 1 [Source:MGI Symbol;Acc:MGI:1196356]
ENSMUSG00000020359	-0.723124	1.6489e-10	1.79674	1.05976	Phykpl	protein_coding	5-phosphohydroxy-L-lysine phospholyase [Source:MGI Symbol;Acc:MGI:1920197]
ENSMUSG00000039768	-0.789112	1.67119e-10	2.79054	1.98339	Dnajc11	protein_coding	DnaJ heat shock protein family (Hsp40) member C11 [Source:MGI Symbol;Acc:MGI:2443386]
ENSMUSG00000033557	-1.51407	1.6769e-10	3.20981	1.67354	Fam20b	protein_coding	family with sequence similarity 20, member B [Source:MGI Symbol;Acc:MGI:2443990]
ENSMUSG00000045636	-1.88568	1.68277e-10	5.70837	3.78354	Mtus1	protein_coding	mitochondrial tumor suppressor 1 [Source:MGI Symbol;Acc:MGI:2142572]
ENSMUSG00000036693	-0.530947	1.68361e-10	1.40705	0.861066	Nop14	protein_coding	NOP14 nucleolar protein [Source:MGI Symbol;Acc:MGI:1922666]
ENSMUSG00000033788	-1.65223	1.69671e-10	3.48348	1.80651	Dysf	protein_coding	dysferlin [Source:MGI Symbol;Acc:MGI:1349385]
ENSMUSG00000028706	-0.534027	1.69863e-10	2.14867	1.60049	Nsun4	protein_coding	NOL1/NOP2/Sun domain family, member 4 [Source:MGI Symbol;Acc:MGI:1919431]
ENSMUSG00000036934	-0.865312	1.70397e-10	2.02976	1.14774	4921524J17Rik	protein_coding	RIKEN cDNA 4921524J17 gene [Source:MGI Symbol;Acc:MGI:1913964]
ENSMUSG00000079557	-1.47723	1.71649e-10	3.8885	2.38684	37316	protein_coding	membrane-associated ring finger (C3HC4) 2 [Source:MGI Symbol;Acc:MGI:1925915]
ENSMUSG00000045410	-1.23749	1.72017e-10	2.05094	0.796953	Akr1e1	protein_coding	aldo-keto reductase family 1, member E1 [Source:MGI Symbol;Acc:MGI:1914758]
ENSMUSG00000061461	-1.5665	1.72835e-10	4.6477	3.04358	Smim20	protein_coding	small integral membrane protein 20 [Source:MGI Symbol;Acc:MGI:1913528]
ENSMUSG00000031807	-1.33093	1.73238e-10	4.00296	2.64636	Pgls	protein_coding	6-phosphogluconolactonase [Source:MGI Symbol;Acc:MGI:1913421]
ENSMUSG00000078134	-0.676156	1.73805e-10	1.27455	0.585953	Gm12355	protein_coding	predicted gene 12355 [Source:MGI Symbol;Acc:MGI:3649769]
ENSMUSG00000053062	-1.18053	1.73927e-10	3.15972	1.95927	Jam2	protein_coding	junction adhesion molecule 2 [Source:MGI Symbol;Acc:MGI:1933820]
ENSMUSG00000025510	-1.95216	1.73927e-10	4.56148	2.58213	Cd151	protein_coding	CD151 antigen [Source:MGI Symbol;Acc:MGI:1096360]
ENSMUSG00000027133	-1.52076	1.74402e-10	5.20227	3.62861	Nop10	protein_coding	NOP10 ribonucleoprotein [Source:MGI Symbol;Acc:MGI:1913431]
ENSMUSG00000094483	-0.864883	1.75199e-10	2.87756	1.9944	Purb	protein_coding	purine rich element binding protein B [Source:MGI Symbol;Acc:MGI:1338779]
ENSMUSG00000099041	-0.56319	1.78473e-10	1.78347	1.20671	Gm28035	protein_coding	predicted gene, 28035 [Source:MGI Symbol;Acc:MGI:5547771]
ENSMUSG00000078350	-0.752167	1.78473e-10	1.50499	0.732464	Smim1	protein_coding	small integral membrane protein 1 [Source:MGI Symbol;Acc:MGI:1916109]
ENSMUSG00000031534	-0.998006	1.78473e-10	3.2835	2.26498	Smim19	protein_coding	small integral membrane protein 19 [Source:MGI Symbol;Acc:MGI:2142501]
ENSMUSG00000057506	-0.739952	1.79306e-10	1.39466	0.639056	Bloc1s2	protein_coding	biogenesis of lysosomal organelles complex-1, subunit 2 [Source:MGI Symbol;Acc:MGI:1920939]
ENSMUSG00000038764	-0.841625	1.80115e-10	1.80059	0.943889	Ptpn3	protein_coding	protein tyrosine phosphatase, non-receptor type 3 [Source:MGI Symbol;Acc:MGI:105307]
ENSMUSG00000020677	-0.905537	1.80546e-10	1.21579	0.290939	Ddx52	protein_coding	DEAD (Asp-Glu-Ala-Asp) box polypeptide 52 [Source:MGI Symbol;Acc:MGI:1925644]
ENSMUSG00000027367	-1.4855	1.82479e-10	4.47742	2.95665	Stard7	protein_coding	START domain containing 7 [Source:MGI Symbol;Acc:MGI:2139090]
ENSMUSG00000031504	-0.818352	1.83031e-10	1.83584	1.0029	Rab20	protein_coding	RAB20, member RAS oncogene family [Source:MGI Symbol;Acc:MGI:102789]
ENSMUSG00000071662	-1.13065	1.83031e-10	2.28082	1.13438	Polr2g	protein_coding	polymerase (RNA) II (DNA directed) polypeptide G [Source:MGI Symbol;Acc:MGI:1914960]
ENSMUSG00000044393	-1.23699	1.83031e-10	2.75571	1.50055	Dsg2	protein_coding	desmoglein 2 [Source:MGI Symbol;Acc:MGI:1196466]
ENSMUSG00000028821	-0.871072	1.83539e-10	2.78661	1.89786	Syf2	protein_coding	SYF2 homolog, RNA splicing factor (S. cerevisiae) [Source:MGI Symbol;Acc:MGI:1915842]
ENSMUSG00000046836	-1.08444	1.83901e-10	1.85829	0.756751	Brox	protein_coding	BRO1 domain and CAAX motif containing [Source:MGI Symbol;Acc:MGI:1918928]
ENSMUSG00000030259	-1.14237	1.83901e-10	2.20265	1.04208	Rassf8	protein_coding	Ras association (RalGDS/AF-6) domain family (N-terminal) member 8 [Source:MGI Symbol;Acc:MGI:1918573]
ENSMUSG00000038526	-1.11344	1.8394e-10	4.2918	3.14172	Car14	protein_coding	carbonic anhydrase 14 [Source:MGI Symbol;Acc:MGI:1344341]
ENSMUSG00000078897	-0.71647	1.84014e-10	1.31968	0.585775	Gm4724	protein_coding	predicted gene 4724 [Source:MGI Symbol;Acc:MGI:3782904]
ENSMUSG00000074994	-1.20397	1.84014e-10	2.99359	1.77002	Qser1	protein_coding	glutamine and serine rich 1 [Source:MGI Symbol;Acc:MGI:2138986]
ENSMUSG00000010290	-0.919223	1.84353e-10	1.72227	0.7885	AI597479	protein_coding	expressed sequence AI597479 [Source:MGI Symbol;Acc:MGI:2138299]
ENSMUSG00000021134	-1.55863	1.84353e-10	5.98528	4.37559	Srsf5	protein_coding	serine/arginine-rich splicing factor 5 [Source:MGI Symbol;Acc:MGI:98287]
ENSMUSG00000019944	-1.73268	1.84353e-10	2.94977	1.19636	Rhobtb1	protein_coding	Rho-related BTB domain containing 1 [Source:MGI Symbol;Acc:MGI:1916538]
ENSMUSG00000037234	-1.26326	1.84486e-10	2.39107	1.11038	Hook3	protein_coding	hook microtubule tethering protein 3 [Source:MGI Symbol;Acc:MGI:2443554]
ENSMUSG00000030842	-1.29816	1.85091e-10	3.86603	2.54148	Lamtor1	protein_coding	late endosomal/lysosomal adaptor, MAPK and MTOR activator 1 [Source:MGI Symbol;Acc:MGI:1913758]
ENSMUSG00000036918	-0.512958	1.85718e-10	1.27986	0.753698	Ttc7	protein_coding	tetratricopeptide repeat domain 7 [Source:MGI Symbol;Acc:MGI:1920999]
ENSMUSG00000051285	-1.7263	1.86477e-10	4.21439	2.46251	Pcmtd1	protein_coding	protein-L-isoaspartate (D-aspartate) O-methyltransferase domain containing 1 [Source:MGI Symbol;Acc:MGI:2441773]
ENSMUSG00000020091	-0.734963	1.87284e-10	1.52238	0.774545	Eif4ebp2	protein_coding	eukaryotic translation initiation factor 4E binding protein 2 [Source:MGI Symbol;Acc:MGI:109198]
ENSMUSG00000032633	-0.781205	1.87857e-10	1.33839	0.540158	Flcn	protein_coding	folliculin [Source:MGI Symbol;Acc:MGI:2442184]
ENSMUSG00000032067	-1.17091	1.89425e-10	2.12898	0.93947	Pts	protein_coding	6-pyruvoyl-tetrahydropterin synthase [Source:MGI Symbol;Acc:MGI:1338783]
ENSMUSG00000048756	-1.38814	1.91952e-10	2.14526	0.741564	Foxo3	protein_coding	forkhead box O3 [Source:MGI Symbol;Acc:MGI:1890081]
ENSMUSG00000037072	-1.54349	1.91952e-10	3.44976	1.88489	Selenof	protein_coding	selenoprotein F [Source:MGI Symbol;Acc:MGI:1927947]
ENSMUSG00000043091	-0.845465	1.93225e-10	3.01854	2.15414	Tuba1c	protein_coding	tubulin, alpha 1C [Source:MGI Symbol;Acc:MGI:1095409]
ENSMUSG00000036138	-0.950351	1.94124e-10	3.2303	2.25873	Acaa1a	protein_coding	acetyl-Coenzyme A acyltransferase 1A [Source:MGI Symbol;Acc:MGI:2148491]
ENSMUSG00000059495	-1.47559	1.96837e-10	4.9296	3.41909	Arhgef12	protein_coding	Rho guanine nucleotide exchange factor (GEF) 12 [Source:MGI Symbol;Acc:MGI:1916882]
ENSMUSG00000006221	-0.449209	1.98531e-10	2.78198	2.31345	Hspb7	protein_coding	heat shock protein family, member 7 (cardiovascular) [Source:MGI Symbol;Acc:MGI:1352494]
ENSMUSG00000020184	-1.15721	1.98531e-10	3.13596	1.95878	Mdm2	protein_coding	transformed mouse 3T3 cell double minute 2 [Source:MGI Symbol;Acc:MGI:96952]
ENSMUSG00000022757	-1.10972	1.99116e-10	2.70568	1.57906	Tfg	protein_coding	Trk-fused gene [Source:MGI Symbol;Acc:MGI:1338041]
ENSMUSG00000005566	-1.00371	2.0107e-10	1.48783	0.468737	Trim28	protein_coding	tripartite motif-containing 28 [Source:MGI Symbol;Acc:MGI:109274]
ENSMUSG00000028760	-0.812316	2.02519e-10	2.04985	1.21845	Eif4g3	protein_coding	eukaryotic translation initiation factor 4 gamma, 3 [Source:MGI Symbol;Acc:MGI:1923935]
ENSMUSG00000015214	-0.880542	2.02891e-10	1.50525	0.605789	Mtmr1	protein_coding	myotubularin related protein 1 [Source:MGI Symbol;Acc:MGI:1858271]
ENSMUSG00000031010	-0.954247	2.02891e-10	3.98323	3.00307	Usp9x	protein_coding	ubiquitin specific peptidase 9, X chromosome [Source:MGI Symbol;Acc:MGI:894681]
ENSMUSG00000031467	-1.19074	2.02891e-10	2.56152	1.3504	Agpat5	protein_coding	1-acylglycerol-3-phosphate O-acyltransferase 5 (lysophosphatidic acid acyltransferase, epsilon) [Source:MGI Symbol;Acc:MGI:1196345]
ENSMUSG00000032194	-1.01138	2.03489e-10	2.71012	1.68157	Kank2	protein_coding	KN motif and ankyrin repeat domains 2 [Source:MGI Symbol;Acc:MGI:2384568]
ENSMUSG00000032026	-0.633354	2.05424e-10	2.83772	2.18744	Rexo2	protein_coding	RNA exonuclease 2 [Source:MGI Symbol;Acc:MGI:1888981]
ENSMUSG00000033423	-0.332037	2.06492e-10	1.60891	1.26667	Eri3	protein_coding	exoribonuclease 3 [Source:MGI Symbol;Acc:MGI:2153887]
ENSMUSG00000030835	-1.03923	2.08634e-10	2.93765	1.88	Nomo1	protein_coding	nodal modulator 1 [Source:MGI Symbol;Acc:MGI:2385850]
ENSMUSG00000026511	-2.02761	2.10289e-10	5.23611	3.17501	Srp9	protein_coding	signal recognition particle 9 [Source:MGI Symbol;Acc:MGI:1350930]
ENSMUSG00000025239	-0.562084	2.11844e-10	2.00312	1.42715	Limd1	protein_coding	LIM domains containing 1 [Source:MGI Symbol;Acc:MGI:1352502]
ENSMUSG00000024664	-0.773548	2.12721e-10	1.63928	0.851405	Fads3	protein_coding	fatty acid desaturase 3 [Source:MGI Symbol;Acc:MGI:1928740]
ENSMUSG00000022023	-1.18445	2.13612e-10	2.37665	1.17532	Wbp4	protein_coding	WW domain binding protein 4 [Source:MGI Symbol;Acc:MGI:109568]
ENSMUSG00000027519	-0.803892	2.15049e-10	2.57165	1.75105	Rab22a	protein_coding	RAB22A, member RAS oncogene family [Source:MGI Symbol;Acc:MGI:105072]
ENSMUSG00000061482	-0.504464	2.16248e-10	0.654059	0.126117	Hist1h4d	protein_coding	histone cluster 1, H4d [Source:MGI Symbol;Acc:MGI:2448423]
ENSMUSG00000052906	-0.779707	2.16248e-10	1.51657	0.722517	Ubxn8	protein_coding	UBX domain protein 8 [Source:MGI Symbol;Acc:MGI:1337129]
ENSMUSG00000042642	-1.1087	2.16749e-10	3.38651	2.25662	Flad1	protein_coding	flavin adenine dinucleotide synthetase 1 [Source:MGI Symbol;Acc:MGI:2443030]
ENSMUSG00000078898	-0.573345	2.17501e-10	1.36345	0.775909	Zfp968	protein_coding	zinc finger protein 968 [Source:MGI Symbol;Acc:MGI:3782903]
ENSMUSG00000031734	-0.70327	2.18425e-10	1.19765	0.477167	Irx3	protein_coding	Iroquois related homeobox 3 [Source:MGI Symbol;Acc:MGI:1197522]
ENSMUSG00000027784	-1.02246	2.18425e-10	2.08928	1.05181	Ppm1l	protein_coding	protein phosphatase 1 (formerly 2C)-like [Source:MGI Symbol;Acc:MGI:2139740]
ENSMUSG00000022338	-0.995332	2.2026e-10	3.415	2.39717	Eny2	protein_coding	enhancer of yellow 2 homolog (Drosophila) [Source:MGI Symbol;Acc:MGI:1919286]
ENSMUSG00000024587	-1.16974	2.21205e-10	3.75345	2.55869	Nars	protein_coding	asparaginyl-tRNA synthetase [Source:MGI Symbol;Acc:MGI:1917473]
ENSMUSG00000021823	-1.24208	2.22038e-10	3.07374	1.81274	Vcl	protein_coding	vinculin [Source:MGI Symbol;Acc:MGI:98927]
ENSMUSG00000026207	-1.37852	2.23927e-10	3.42527	2.02572	Speg	protein_coding	SPEG complex locus [Source:MGI Symbol;Acc:MGI:109282]
ENSMUSG00000035575	-0.922554	2.24568e-10	1.20342	0.260525	Utp6	protein_coding	UTP6 small subunit processome component [Source:MGI Symbol;Acc:MGI:2445193]
ENSMUSG00000029415	-0.612982	2.24652e-10	1.16584	0.537041	Sdad1	protein_coding	SDA1 domain containing 1 [Source:MGI Symbol;Acc:MGI:2140779]
ENSMUSG00000001052	-0.703109	2.25212e-10	0.904261	0.17639	Sec24b	protein_coding	Sec24 related gene family, member B (S. cerevisiae) [Source:MGI Symbol;Acc:MGI:2139764]
ENSMUSG00000033400	-1.56139	2.25212e-10	5.35503	3.75156	Agl	protein_coding	amylo-1,6-glucosidase, 4-alpha-glucanotransferase [Source:MGI Symbol;Acc:MGI:1924809]
ENSMUSG00000041629	-0.601247	2.25751e-10	1.96792	1.35311	Fam104a	protein_coding	family with sequence similarity 104, member A [Source:MGI Symbol;Acc:MGI:106351]
ENSMUSG00000002625	-0.463937	2.26534e-10	1.61251	1.13596	Akap8l	protein_coding	A kinase (PRKA) anchor protein 8-like [Source:MGI Symbol;Acc:MGI:1860606]
ENSMUSG00000068732	-0.69938	2.29883e-10	1.43132	0.710731	Tmem167b	protein_coding	transmembrane protein 167B [Source:MGI Symbol;Acc:MGI:1914745]
ENSMUSG00000037608	-1.70188	2.30318e-10	4.14978	2.42251	Bclaf1	protein_coding	BCL2-associated transcription factor 1 [Source:MGI Symbol;Acc:MGI:1917580]
ENSMUSG00000026074	-2.16597	2.30385e-10	3.96538	1.77529	Map4k4	protein_coding	mitogen-activated protein kinase kinase kinase kinase 4 [Source:MGI Symbol;Acc:MGI:1349394]
ENSMUSG00000044573	-1.68287	2.30502e-10	3.38518	1.68027	Acp1	protein_coding	acid phosphatase 1, soluble [Source:MGI Symbol;Acc:MGI:87881]
ENSMUSG00000045435	-1.22499	2.3191e-10	2.37494	1.13322	Tmem60	protein_coding	transmembrane protein 60 [Source:MGI Symbol;Acc:MGI:2673965]
ENSMUSG00000024213	-0.459702	2.33532e-10	2.83526	2.35827	Nudt3	protein_coding	nudix (nucleotide diphosphate linked moiety X)-type motif 3 [Source:MGI Symbol;Acc:MGI:1928484]
ENSMUSG00000071653	-0.689398	2.33532e-10	2.5337	1.82806	1810009A15Rik	protein_coding	RIKEN cDNA 1810009A15 gene [Source:MGI Symbol;Acc:MGI:1913526]
ENSMUSG00000031502	-0.721136	2.33661e-10	1.81829	1.08314	Col4a1	protein_coding	collagen, type IV, alpha 1 [Source:MGI Symbol;Acc:MGI:88454]
ENSMUSG00000018501	-2.29285	2.33661e-10	5.66294	3.33556	Ncor1	protein_coding	nuclear receptor co-repressor 1 [Source:MGI Symbol;Acc:MGI:1349717]
ENSMUSG00000075700	-1.74202	2.33887e-10	4.65787	2.88447	Selenot	protein_coding	selenoprotein T [Source:MGI Symbol;Acc:MGI:1916477]
ENSMUSG00000042133	-1.46755	2.35855e-10	3.99064	2.4984	Ppig	protein_coding	peptidyl-prolyl isomerase G (cyclophilin G) [Source:MGI Symbol;Acc:MGI:2445173]
ENSMUSG00000062300	-0.360081	2.36124e-10	1.3415	0.969407	Nectin2	protein_coding	nectin cell adhesion molecule 2 [Source:MGI Symbol;Acc:MGI:97822]
ENSMUSG00000033671	-1.1119	2.36124e-10	1.83606	0.707121	Cep350	protein_coding	centrosomal protein 350 [Source:MGI Symbol;Acc:MGI:1921331]
ENSMUSG00000078784	-1.98547	2.36124e-10	4.90063	2.88517	1810022K09Rik	protein_coding	RIKEN cDNA 1810022K09 gene [Source:MGI Symbol;Acc:MGI:1916376]
ENSMUSG00000015757	-0.773078	2.36983e-10	1.67968	0.890772	Ppil4	protein_coding	peptidylprolyl isomerase (cyclophilin)-like 4 [Source:MGI Symbol;Acc:MGI:1914668]
ENSMUSG00000027257	-2.26336	2.36983e-10	6.48267	4.17502	Pacsin3	protein_coding	protein kinase C and casein kinase substrate in neurons 3 [Source:MGI Symbol;Acc:MGI:1891410]
ENSMUSG00000028530	-1.60158	2.40214e-10	3.85106	2.22621	Jak1	protein_coding	Janus kinase 1 [Source:MGI Symbol;Acc:MGI:96628]
ENSMUSG00000002820	-0.729545	2.41103e-10	2.27839	1.53408	Atg4d	protein_coding	autophagy related 4D, cysteine peptidase [Source:MGI Symbol;Acc:MGI:2444308]
ENSMUSG00000031954	-0.801245	2.42697e-10	2.48146	1.66349	Cfdp1	protein_coding	craniofacial development protein 1 [Source:MGI Symbol;Acc:MGI:1344403]
ENSMUSG00000031479	-0.70966	2.42974e-10	2.17158	1.44611	Vps36	protein_coding	vacuolar protein sorting 36 [Source:MGI Symbol;Acc:MGI:1917410]
ENSMUSG00000020076	-0.651238	2.43141e-10	2.00867	1.34277	Ddx50	protein_coding	DEAD (Asp-Glu-Ala-Asp) box polypeptide 50 [Source:MGI Symbol;Acc:MGI:2182303]
ENSMUSG00000030704	-1.86626	2.43141e-10	4.26539	2.37324	Rab6a	protein_coding	RAB6A, member RAS oncogene family [Source:MGI Symbol;Acc:MGI:894313]
ENSMUSG00000039756	-0.754369	2.43962e-10	2.37481	1.60414	Dnttip2	protein_coding	deoxynucleotidyltransferase, terminal, interacting protein 2 [Source:MGI Symbol;Acc:MGI:1923173]
ENSMUSG00000031133	-1.17226	2.46441e-10	2.02514	0.835075	Arhgef6	protein_coding	Rac/Cdc42 guanine nucleotide exchange factor (GEF) 6 [Source:MGI Symbol;Acc:MGI:1920591]
ENSMUSG00000042686	-0.763068	2.48344e-10	1.4746	0.697488	Jph1	protein_coding	junctophilin 1 [Source:MGI Symbol;Acc:MGI:1891495]
ENSMUSG00000024122	-1.33345	2.48729e-10	2.35313	0.999393	Pdpk1	protein_coding	3-phosphoinositide dependent protein kinase 1 [Source:MGI Symbol;Acc:MGI:1338068]
ENSMUSG00000042390	-0.61733	2.49793e-10	1.31509	0.681384	Gatad2b	protein_coding	GATA zinc finger domain containing 2B [Source:MGI Symbol;Acc:MGI:2443225]
ENSMUSG00000026496	-0.717196	2.49793e-10	1.91391	1.18238	Parp1	protein_coding	poly (ADP-ribose) polymerase family, member 1 [Source:MGI Symbol;Acc:MGI:1340806]
ENSMUSG00000035311	-0.69021	2.49916e-10	0.982129	0.272564	Gnptab	protein_coding	N-acetylglucosamine-1-phosphate transferase, alpha and beta subunits [Source:MGI Symbol;Acc:MGI:3643902]
ENSMUSG00000015365	-1.07088	2.49916e-10	2.13024	1.03992	Mov10l1	protein_coding	Moloney leukemia virus 10-like 1 [Source:MGI Symbol;Acc:MGI:1891384]
ENSMUSG00000030058	-0.537716	2.52556e-10	1.27711	0.723999	Copg1	protein_coding	coatomer protein complex, subunit gamma 1 [Source:MGI Symbol;Acc:MGI:1858696]
ENSMUSG00000110234	-1.16365	2.53306e-10	2.44235	1.26002	Gm45799	protein_coding	predicted gene 45799 [Source:MGI Symbol;Acc:MGI:5804914]
ENSMUSG00000046311	-1.16392	2.53306e-10	2.16206	0.975424	Zfp62	protein_coding	zinc finger protein 62 [Source:MGI Symbol;Acc:MGI:99662]
ENSMUSG00000021905	-1.54081	2.53306e-10	5.48083	3.90007	Dph3	protein_coding	diphthamine biosynthesis 3 [Source:MGI Symbol;Acc:MGI:1922658]
ENSMUSG00000030917	-1.10658	2.58432e-10	1.62263	0.499517	Tmem159	protein_coding	transmembrane protein 159 [Source:MGI Symbol;Acc:MGI:1925752]
ENSMUSG00000070056	-1.29856	2.58432e-10	2.57384	1.25868	Mfhas1	protein_coding	malignant fibrous histiocytoma amplified sequence 1 [Source:MGI Symbol;Acc:MGI:1098644]
ENSMUSG00000028959	-1.11887	2.60178e-10	4.32838	3.17857	Fastk	protein_coding	Fas-activated serine/threonine kinase [Source:MGI Symbol;Acc:MGI:1913837]
ENSMUSG00000021709	-1.89441	2.63076e-10	4.02454	2.10425	Erbin	protein_coding	Erbb2 interacting protein [Source:MGI Symbol;Acc:MGI:1890169]
ENSMUSG00000028104	-0.451354	2.6326e-10	1.04531	0.581932	Polr3gl	protein_coding	polymerase (RNA) III (DNA directed) polypeptide G like [Source:MGI Symbol;Acc:MGI:1917120]
ENSMUSG00000076437	-0.581826	2.63544e-10	2.07057	1.47241	Selenoh	protein_coding	selenoprotein H [Source:MGI Symbol;Acc:MGI:1919907]
ENSMUSG00000053838	-1.04274	2.63929e-10	2.73928	1.6793	Nudcd3	protein_coding	NudC domain containing 3 [Source:MGI Symbol;Acc:MGI:2144158]
ENSMUSG00000020300	-0.909122	2.65559e-10	2.6027	1.67618	Cpeb4	protein_coding	cytoplasmic polyadenylation element binding protein 4 [Source:MGI Symbol;Acc:MGI:1914829]
ENSMUSG00000031446	-1.3447	2.66991e-10	2.68473	1.32264	Cul4a	protein_coding	cullin 4A [Source:MGI Symbol;Acc:MGI:1914487]
ENSMUSG00000074754	-1.16854	2.68007e-10	3.3737	2.18379	Smim26	protein_coding	small integral membrane protein 26 [Source:MGI Symbol;Acc:MGI:2685407]
ENSMUSG00000078861	-0.817064	2.68464e-10	1.49046	0.656303	Zfp931	protein_coding	zinc finger protein 931 [Source:MGI Symbol;Acc:MGI:2441662]
ENSMUSG00000029407	-1.53845	2.71094e-10	2.55302	0.99664	Uso1	protein_coding	USO1 vesicle docking factor [Source:MGI Symbol;Acc:MGI:1929095]
ENSMUSG00000064254	-0.712905	2.72053e-10	2.4939	1.76533	Ethe1	protein_coding	ethylmalonic encephalopathy 1 [Source:MGI Symbol;Acc:MGI:1913321]
ENSMUSG00000005674	-0.926347	2.74131e-10	3.96566	3.01405	Tomm40l	protein_coding	translocase of outer mitochondrial membrane 40 homolog-like (yeast) [Source:MGI Symbol;Acc:MGI:3589112]
ENSMUSG00000025035	-1.00473	2.7612e-10	2.50096	1.48067	Arl3	protein_coding	ADP-ribosylation factor-like 3 [Source:MGI Symbol;Acc:MGI:1929699]
ENSMUSG00000091803	-1.75246	2.79595e-10	3.69241	1.918	Cox16	protein_coding	cytochrome c oxidase assembly protein 16 [Source:MGI Symbol;Acc:MGI:1913522]
ENSMUSG00000021427	-0.673604	2.79738e-10	1.44591	0.756211	Ssr1	protein_coding	signal sequence receptor, alpha [Source:MGI Symbol;Acc:MGI:105082]
ENSMUSG00000078653	-0.957062	2.80055e-10	2.16848	1.19693	Cntd1	protein_coding	cyclin N-terminal domain containing 1 [Source:MGI Symbol;Acc:MGI:1923965]
ENSMUSG00000051149	-1.09	2.80397e-10	2.0461	0.939518	Adnp	protein_coding	activity-dependent neuroprotective protein [Source:MGI Symbol;Acc:MGI:1338758]
ENSMUSG00000033186	-1.32445	2.80932e-10	2.73791	1.39735	Mzt1	protein_coding	mitotic spindle organizing protein 1 [Source:MGI Symbol;Acc:MGI:1924039]
ENSMUSG00000047284	-0.715254	2.82258e-10	1.36081	0.634075	Neurl4	protein_coding	neuralized E3 ubiquitin protein ligase 4 [Source:MGI Symbol;Acc:MGI:1921092]
ENSMUSG00000005882	-1.61377	2.82258e-10	4.80327	3.15653	Uqcc1	protein_coding	ubiquinol-cytochrome c reductase complex assembly factor 1 [Source:MGI Symbol;Acc:MGI:1929472]
ENSMUSG00000060475	-0.931851	2.82501e-10	2.50942	1.55976	Wtap	protein_coding	Wilms tumour 1-associating protein [Source:MGI Symbol;Acc:MGI:1926395]
ENSMUSG00000019818	-1.43136	2.82501e-10	3.26584	1.81519	Cd164	protein_coding	CD164 antigen [Source:MGI Symbol;Acc:MGI:1859568]
ENSMUSG00000024847	-0.666015	2.83658e-10	1.03053	0.349886	Aip	protein_coding	aryl-hydrocarbon receptor-interacting protein [Source:MGI Symbol;Acc:MGI:109622]
ENSMUSG00000021140	-0.974758	2.83764e-10	1.74616	0.754282	Pcnx	protein_coding	pecanex homolog (Drosophila) [Source:MGI Symbol;Acc:MGI:1891924]
ENSMUSG00000023010	-1.46212	2.83838e-10	3.39928	1.91692	Tmbim6	protein_coding	transmembrane BAX inhibitor motif containing 6 [Source:MGI Symbol;Acc:MGI:99682]
ENSMUSG00000020803	-0.826982	2.84106e-10	2.72667	1.88256	Txndc17	protein_coding	thioredoxin domain containing 17 [Source:MGI Symbol;Acc:MGI:1289248]
ENSMUSG00000054408	-0.794506	2.86717e-10	2.24797	1.43823	Spcs3	protein_coding	signal peptidase complex subunit 3 homolog (S. cerevisiae) [Source:MGI Symbol;Acc:MGI:1923937]
ENSMUSG00000015112	-1.76003	2.87071e-10	4.5547	2.7664	Slc25a13	protein_coding	solute carrier family 25 (mitochondrial carrier, adenine nucleotide translocator), member 13 [Source:MGI Symbol;Acc:MGI:1354721]
ENSMUSG00000079658	-1.95021	2.89439e-10	7.0607	5.04664	Eloc	protein_coding	elongin C [Source:MGI Symbol;Acc:MGI:1915173]
ENSMUSG00000008333	-0.826029	2.89729e-10	1.72386	0.88178	Snrpb2	protein_coding	U2 small nuclear ribonucleoprotein B [Source:MGI Symbol;Acc:MGI:104805]
ENSMUSG00000034190	-0.983363	2.89988e-10	1.82642	0.826368	Chmp7	protein_coding	charged multivesicular body protein 7 [Source:MGI Symbol;Acc:MGI:1913922]
ENSMUSG00000006699	-1.03909	2.9202e-10	3.38643	2.32596	Cdc42	protein_coding	cell division cycle 42 [Source:MGI Symbol;Acc:MGI:106211]
ENSMUSG00000050556	-1.12799	2.92095e-10	1.83567	0.688228	Kcnb1	protein_coding	potassium voltage gated channel, Shab-related subfamily, member 1 [Source:MGI Symbol;Acc:MGI:96666]
ENSMUSG00000005220	-1.90237	2.9312e-10	3.96684	2.04271	Corin	protein_coding	corin [Source:MGI Symbol;Acc:MGI:1349451]
ENSMUSG00000029545	0.0973193	2.94107e-10	2.64236	2.72434	Acads	protein_coding	acyl-Coenzyme A dehydrogenase, short chain [Source:MGI Symbol;Acc:MGI:87868]
ENSMUSG00000022744	-0.507846	2.95806e-10	1.14547	0.617028	Cldnd1	protein_coding	claudin domain containing 1 [Source:MGI Symbol;Acc:MGI:2447860]
ENSMUSG00000024191	-0.742457	2.95806e-10	1.15165	0.392659	Bnip1	protein_coding	BCL2/adenovirus E1B interacting protein 1 [Source:MGI Symbol;Acc:MGI:109328]
ENSMUSG00000038539	-0.42769	2.9629e-10	1.29389	0.851262	Atf5	protein_coding	activating transcription factor 5 [Source:MGI Symbol;Acc:MGI:2141857]
ENSMUSG00000027184	-1.58893	2.97354e-10	3.64514	2.03438	Caprin1	protein_coding	cell cycle associated protein 1 [Source:MGI Symbol;Acc:MGI:1858234]
ENSMUSG00000009569	-0.62078	3.01139e-10	0.990035	0.346626	Mkl2	protein_coding	MKL/myocardin-like 2 [Source:MGI Symbol;Acc:MGI:3050795]
ENSMUSG00000036026	-0.20879	3.01517e-10	1.07996	0.862655	Tmem63b	protein_coding	transmembrane protein 63b [Source:MGI Symbol;Acc:MGI:2387609]
ENSMUSG00000029469	-1.12079	3.01641e-10	3.05102	1.91125	Ift81	protein_coding	intraflagellar transport 81 [Source:MGI Symbol;Acc:MGI:1098597]
ENSMUSG00000001911	-1.61826	3.01641e-10	3.54931	1.91036	Nfix	protein_coding	nuclear factor I/X [Source:MGI Symbol;Acc:MGI:97311]
ENSMUSG00000029103	-0.611317	3.03458e-10	2.44422	1.81728	Lrpap1	protein_coding	low density lipoprotein receptor-related protein associated protein 1 [Source:MGI Symbol;Acc:MGI:96829]
ENSMUSG00000038664	-1.11043	3.05622e-10	2.68922	1.56168	Herc1	protein_coding	HECT and RLD domain containing E3 ubiquitin protein ligase family member 1 [Source:MGI Symbol;Acc:MGI:2384589]
ENSMUSG00000042462	-0.9802	3.07673e-10	1.95037	0.954569	Dctpp1	protein_coding	dCTP pyrophosphatase 1 [Source:MGI Symbol;Acc:MGI:1913672]
ENSMUSG00000037772	-2.11909	3.09519e-10	6.69696	4.5274	Mrpl23	protein_coding	mitochondrial ribosomal protein L23 [Source:MGI Symbol;Acc:MGI:1196612]
ENSMUSG00000039069	-0.861301	3.0992e-10	1.42635	0.55177	Mtg2	protein_coding	mitochondrial ribosome associated GTPase 2 [Source:MGI Symbol;Acc:MGI:106565]
ENSMUSG00000019578	-0.977415	3.0992e-10	3.18787	2.19085	Ubxn6	protein_coding	UBX domain protein 6 [Source:MGI Symbol;Acc:MGI:1913780]
ENSMUSG00000062825	-1.27606	3.1034e-10	5.48432	4.14881	Actg1	protein_coding	actin, gamma, cytoplasmic 1 [Source:MGI Symbol;Acc:MGI:87906]
ENSMUSG00000002900	-0.647018	3.12056e-10	1.44293	0.779668	Lamb1	protein_coding	laminin B1 [Source:MGI Symbol;Acc:MGI:96743]
ENSMUSG00000036737	-0.805272	3.12056e-10	2.02057	1.20032	Oxsr1	protein_coding	oxidative-stress responsive 1 [Source:MGI Symbol;Acc:MGI:1917378]
ENSMUSG00000033444	-1.38735	3.16444e-10	2.39266	0.985797	Specc1l	protein_coding	sperm antigen with calponin homology and coiled-coil domains 1-like [Source:MGI Symbol;Acc:MGI:1921642]
ENSMUSG00000025220	-1.68745	3.16444e-10	4.17877	2.46563	Mgea5	protein_coding	meningioma expressed antigen 5 (hyaluronidase) [Source:MGI Symbol;Acc:MGI:1932139]
ENSMUSG00000005732	-1.32643	3.23917e-10	3.33957	1.99196	Ranbp1	protein_coding	RAN binding protein 1 [Source:MGI Symbol;Acc:MGI:96269]
ENSMUSG00000034799	-0.478698	3.25012e-10	1.00103	0.503713	Unc13a	protein_coding	unc-13 homolog A (C. elegans) [Source:MGI Symbol;Acc:MGI:3051532]
ENSMUSG00000031422	-1.51248	3.32193e-10	3.41187	1.87535	Morf4l2	protein_coding	mortality factor 4 like 2 [Source:MGI Symbol;Acc:MGI:1927167]
ENSMUSG00000059409	-0.542509	3.33321e-10	1.68337	1.12855	Ppp2r5d	protein_coding	protein phosphatase 2, regulatory subunit B', delta [Source:MGI Symbol;Acc:MGI:2388481]
ENSMUSG00000063236	-0.621463	3.33321e-10	1.00048	0.362845	1110038F14Rik	protein_coding	RIKEN cDNA 1110038F14 gene [Source:MGI Symbol;Acc:MGI:2152337]
ENSMUSG00000020843	-1.10184	3.39609e-10	2.98521	1.86472	Timm22	protein_coding	translocase of inner mitochondrial membrane 22 [Source:MGI Symbol;Acc:MGI:1929742]
ENSMUSG00000024259	-1.25371	3.39682e-10	3.37338	2.09865	Slc25a46	protein_coding	solute carrier family 25, member 46 [Source:MGI Symbol;Acc:MGI:1914703]
ENSMUSG00000032905	-0.84906	3.43082e-10	1.58129	0.71815	Atg12	protein_coding	autophagy related 12 [Source:MGI Symbol;Acc:MGI:1914776]
ENSMUSG00000039536	-1.36615	3.46287e-10	2.34407	0.957433	Stau1	protein_coding	staufen (RNA binding protein) homolog 1 (Drosophila) [Source:MGI Symbol;Acc:MGI:1338864]
ENSMUSG00000035828	-0.712612	3.47371e-10	1.39846	0.671025	Pim3	protein_coding	proviral integration site 3 [Source:MGI Symbol;Acc:MGI:1355297]
ENSMUSG00000039148	-1.04295	3.49231e-10	1.87092	0.813329	Sart1	protein_coding	squamous cell carcinoma antigen recognized by T cells 1 [Source:MGI Symbol;Acc:MGI:1309453]
ENSMUSG00000041638	-0.418884	3.51306e-10	1.1885	0.756231	Gcn1l1	protein_coding	GCN1 general control of amino-acid synthesis 1-like 1 (yeast) [Source:MGI Symbol;Acc:MGI:2444248]
ENSMUSG00000084786	-1.94828	3.53215e-10	6.18951	4.19343	Ubl5	protein_coding	ubiquitin-like 5 [Source:MGI Symbol;Acc:MGI:1913427]
ENSMUSG00000022358	-1.28259	3.54105e-10	4.2857	2.9744	Fbxo32	protein_coding	F-box protein 32 [Source:MGI Symbol;Acc:MGI:1914981]
ENSMUSG00000040548	-1.11873	3.54646e-10	1.71231	0.577275	Tex2	protein_coding	testis expressed gene 2 [Source:MGI Symbol;Acc:MGI:102465]
ENSMUSG00000046096	-0.614466	3.56472e-10	1.59603	0.966306	BC030336	protein_coding	cDNA sequence BC030336 [Source:MGI Symbol;Acc:MGI:2446240]
ENSMUSG00000049940	-1.07061	3.57535e-10	1.9566	0.870459	Pgrmc2	protein_coding	progesterone receptor membrane component 2 [Source:MGI Symbol;Acc:MGI:1918054]
ENSMUSG00000052144	-0.898271	3.57728e-10	1.99766	1.08499	Ppp4r2	protein_coding	protein phosphatase 4, regulatory subunit 2 [Source:MGI Symbol;Acc:MGI:3027896]
ENSMUSG00000003346	-1.11732	3.58608e-10	1.6292	0.491848	Abhd17a	protein_coding	abhydrolase domain containing 17A [Source:MGI Symbol;Acc:MGI:106388]
ENSMUSG00000095463	-1.4595	3.60752e-10	3.90787	2.42424	Entpd4	protein_coding	ectonucleoside triphosphate diphosphohydrolase 4 [Source:MGI Symbol;Acc:MGI:1914714]
ENSMUSG00000041035	-0.615854	3.63361e-10	1.81781	1.18847	Gm17018	protein_coding	predicted gene 17018 [Source:MGI Symbol;Acc:MGI:4820566]
ENSMUSG00000014402	-1.10864	3.63361e-10	3.0101	1.88292	Tsg101	protein_coding	tumor susceptibility gene 101 [Source:MGI Symbol;Acc:MGI:106581]
ENSMUSG00000049606	-1.36495	3.63361e-10	2.92879	1.54087	Zfp644	protein_coding	zinc finger protein 644 [Source:MGI Symbol;Acc:MGI:1277212]
ENSMUSG00000004285	-1.99054	3.63361e-10	4.63309	2.61563	Atp6v1f	protein_coding	ATPase, H+ transporting, lysosomal V1 subunit F [Source:MGI Symbol;Acc:MGI:1913394]
ENSMUSG00000040370	-2.2766	3.63361e-10	5.89394	3.58053	Etfrf1	protein_coding	electron transfer flavoprotein regulatory factor 1 [Source:MGI Symbol;Acc:MGI:1914886]
ENSMUSG00000054309	-0.697933	3.67702e-10	1.34905	0.636658	Cpsf3	protein_coding	cleavage and polyadenylation specificity factor 3 [Source:MGI Symbol;Acc:MGI:1859328]
ENSMUSG00000046229	-1.13475	3.68707e-10	2.14718	0.998999	Scand1	protein_coding	SCAN domain-containing 1 [Source:MGI Symbol;Acc:MGI:1343132]
ENSMUSG00000029454	-1.51798	3.68829e-10	4.10235	2.55914	Mapkapk5	protein_coding	MAP kinase-activated protein kinase 5 [Source:MGI Symbol;Acc:MGI:1333110]
ENSMUSG00000024096	-1.40074	3.70339e-10	2.24594	0.824975	Ralbp1	protein_coding	ralA binding protein 1 [Source:MGI Symbol;Acc:MGI:108466]
ENSMUSG00000029578	-0.880183	3.70429e-10	2.17363	1.27815	Wipi2	protein_coding	WD repeat domain, phosphoinositide interacting 2 [Source:MGI Symbol;Acc:MGI:1923831]
ENSMUSG00000022066	-1.46469	3.7067e-10	3.90093	2.4122	Entpd4b	protein_coding	ectonucleoside triphosphate diphosphohydrolase 4B [Source:MGI Symbol;Acc:MGI:5435040]
ENSMUSG00000008450	-0.767326	3.73902e-10	1.94473	1.1626	Nutf2	protein_coding	nuclear transport factor 2 [Source:MGI Symbol;Acc:MGI:1915301]
ENSMUSG00000028669	-0.646836	3.77162e-10	1.07788	0.415764	Pithd1	protein_coding	PITH (C-terminal proteasome-interacting domain of thioredoxin-like) domain containing 1 [Source:MGI Symbol;Acc:MGI:1913443]
ENSMUSG00000001729	-1.00047	3.77379e-10	2.35755	1.34202	Akt1	protein_coding	thymoma viral proto-oncogene 1 [Source:MGI Symbol;Acc:MGI:87986]
ENSMUSG00000032002	-2.08223	3.78706e-10	4.49752	2.39017	Dcun1d5	protein_coding	DCN1, defective in cullin neddylation 1, domain containing 5 (S. cerevisiae) [Source:MGI Symbol;Acc:MGI:1924113]
ENSMUSG00000005469	-0.489942	3.79622e-10	3.72803	3.2028	Prkaca	protein_coding	protein kinase, cAMP dependent, catalytic, alpha [Source:MGI Symbol;Acc:MGI:97592]
ENSMUSG00000034807	-0.633844	3.81105e-10	1.42184	0.773475	Colgalt1	protein_coding	collagen beta(1-O)galactosyltransferase 1 [Source:MGI Symbol;Acc:MGI:1924348]
ENSMUSG00000037075	-1.26546	3.81105e-10	2.36542	1.08528	Rnf139	protein_coding	ring finger protein 139 [Source:MGI Symbol;Acc:MGI:1923091]
ENSMUSG00000069729	-1.06971	3.87804e-10	1.93439	0.845767	Arid1b	protein_coding	AT rich interactive domain 1B (SWI-like) [Source:MGI Symbol;Acc:MGI:1926129]
ENSMUSG00000044934	-0.561651	3.88125e-10	1.2809	0.706161	Zfp367	protein_coding	zinc finger protein 367 [Source:MGI Symbol;Acc:MGI:2442266]
ENSMUSG00000003809	-1.52173	3.9448e-10	4.17378	2.62553	Gcdh	protein_coding	glutaryl-Coenzyme A dehydrogenase [Source:MGI Symbol;Acc:MGI:104541]
ENSMUSG00000050628	-0.911415	3.94714e-10	1.19441	0.268345	Ubald2	protein_coding	UBA-like domain containing 2 [Source:MGI Symbol;Acc:MGI:1914635]
ENSMUSG00000036202	-1.47583	3.95392e-10	2.30527	0.80717	Rif1	protein_coding	replication timing regulatory factor 1 [Source:MGI Symbol;Acc:MGI:1098622]
ENSMUSG00000027618	-1.05072	3.97174e-10	2.75777	1.69001	Nfs1	protein_coding	nitrogen fixation gene 1 (S. cerevisiae) [Source:MGI Symbol;Acc:MGI:1316706]
ENSMUSG00000033543	-1.49986	3.97174e-10	3.72397	2.20088	Gtf2a2	protein_coding	general transcription factor II A, 2 [Source:MGI Symbol;Acc:MGI:1933289]
ENSMUSG00000029684	-0.559189	3.9758e-10	1.30386	0.725226	Wasl	protein_coding	Wiskott-Aldrich syndrome-like (human) [Source:MGI Symbol;Acc:MGI:1920428]
ENSMUSG00000031382	-1.90837	3.9758e-10	6.0252	4.06723	Asb11	protein_coding	ankyrin repeat and SOCS box-containing 11 [Source:MGI Symbol;Acc:MGI:1916104]
ENSMUSG00000035941	-1.00411	3.98303e-10	2.25239	1.23266	Ibtk	protein_coding	inhibitor of Bruton agammaglobulinemia tyrosine kinase [Source:MGI Symbol;Acc:MGI:1918677]
ENSMUSG00000046711	-1.73793	3.99206e-10	3.02928	1.27242	Hmga1	protein_coding	high mobility group AT-hook 1 [Source:MGI Symbol;Acc:MGI:96160]
ENSMUSG00000033624	-0.505006	4.01639e-10	1.25955	0.740212	Pdpr	protein_coding	pyruvate dehydrogenase phosphatase regulatory subunit [Source:MGI Symbol;Acc:MGI:2442188]
ENSMUSG00000021185	-1.68289	4.02169e-10	2.74157	1.04183	Dglucy	protein_coding	D-glutamate cyclase [Source:MGI Symbol;Acc:MGI:2444813]
ENSMUSG00000027488	-1.25519	4.03036e-10	3.86988	2.59052	Snta1	protein_coding	syntrophin, acidic 1 [Source:MGI Symbol;Acc:MGI:101772]
ENSMUSG00000036591	-1.69234	4.05275e-10	3.84605	2.13017	Arhgap21	protein_coding	Rho GTPase activating protein 21 [Source:MGI Symbol;Acc:MGI:1918685]
ENSMUSG00000027879	-0.56686	4.07389e-10	1.35443	0.772904	Sec22b	protein_coding	SEC22 homolog B, vesicle trafficking protein [Source:MGI Symbol;Acc:MGI:1338759]
ENSMUSG00000020307	-1.93537	4.07389e-10	5.63494	3.66059	Cdc34	protein_coding	cell division cycle 34 [Source:MGI Symbol;Acc:MGI:102657]
ENSMUSG00000029502	-0.908744	4.09055e-10	3.00499	2.07724	Golga3	protein_coding	golgi autoantigen, golgin subfamily a, 3 [Source:MGI Symbol;Acc:MGI:96958]
ENSMUSG00000048285	-1.34302	4.09055e-10	1.66433	0.303321	Frmd6	protein_coding	FERM domain containing 6 [Source:MGI Symbol;Acc:MGI:2442579]
ENSMUSG00000022525	-1.07954	4.13721e-10	2.71439	1.61687	Hrasls	protein_coding	HRAS-like suppressor [Source:MGI Symbol;Acc:MGI:1351473]
ENSMUSG00000033793	-1.33333	4.13721e-10	2.01171	0.659569	Atp6v1h	protein_coding	ATPase, H+ transporting, lysosomal V1 subunit H [Source:MGI Symbol;Acc:MGI:1914864]
ENSMUSG00000022407	-1.15065	4.16248e-10	2.82306	1.65463	Adsl	protein_coding	adenylosuccinate lyase [Source:MGI Symbol;Acc:MGI:103202]
ENSMUSG00000028618	-1.35693	4.16437e-10	2.67007	1.29733	Tmem59	protein_coding	transmembrane protein 59 [Source:MGI Symbol;Acc:MGI:1929278]
ENSMUSG00000044066	-0.796853	4.20867e-10	1.22698	0.411209	Cep68	protein_coding	centrosomal protein 68 [Source:MGI Symbol;Acc:MGI:2667663]
ENSMUSG00000042447	-0.623634	4.20992e-10	1.48956	0.850187	Mios	protein_coding	missing oocyte, meiosis regulator, homolog (Drosophila) [Source:MGI Symbol;Acc:MGI:2182066]
ENSMUSG00000057738	-1.46414	4.21212e-10	2.64249	1.15372	Sptan1	protein_coding	spectrin alpha, non-erythrocytic 1 [Source:MGI Symbol;Acc:MGI:98386]
ENSMUSG00000034928	-1.54344	4.21212e-10	2.34535	0.78184	Rnf44	protein_coding	ring finger protein 44 [Source:MGI Symbol;Acc:MGI:2145310]
ENSMUSG00000030089	-1.46955	4.21509e-10	2.86009	1.37271	Slc41a3	protein_coding	solute carrier family 41, member 3 [Source:MGI Symbol;Acc:MGI:1918949]
ENSMUSG00000095687	-1.48988	4.21582e-10	5.26326	3.73416	Rnaset2a	protein_coding	ribonuclease T2A [Source:MGI Symbol;Acc:MGI:1915445]
ENSMUSG00000017831	-0.861299	4.22178e-10	2.29297	1.41548	Rab5a	protein_coding	RAB5A, member RAS oncogene family [Source:MGI Symbol;Acc:MGI:105926]
ENSMUSG00000021794	-1.03814	4.22178e-10	3.76818	2.70347	Glud1	protein_coding	glutamate dehydrogenase 1 [Source:MGI Symbol;Acc:MGI:95753]
ENSMUSG00000038886	-0.763163	4.22987e-10	1.97861	1.20176	Man2a2	protein_coding	mannosidase 2, alpha 2 [Source:MGI Symbol;Acc:MGI:2150656]
ENSMUSG00000021556	-1.02931	4.28415e-10	1.88027	0.833456	Golm1	protein_coding	golgi membrane protein 1 [Source:MGI Symbol;Acc:MGI:1917329]
ENSMUSG00000038622	-0.262742	4.29355e-10	0.959668	0.679813	Med30	protein_coding	mediator complex subunit 30 [Source:MGI Symbol;Acc:MGI:1917040]
ENSMUSG00000022051	-0.688045	4.33039e-10	2.99833	2.29194	Bnip3l	protein_coding	BCL2/adenovirus E1B interacting protein 3-like [Source:MGI Symbol;Acc:MGI:1332659]
ENSMUSG00000024875	-1.22933	4.34857e-10	3.18593	1.93724	Yif1a	protein_coding	Yip1 interacting factor homolog A (S. cerevisiae) [Source:MGI Symbol;Acc:MGI:1915340]
ENSMUSG00000017264	-0.809516	4.35077e-10	1.77939	0.952705	Exosc10	protein_coding	exosome component 10 [Source:MGI Symbol;Acc:MGI:1355322]
ENSMUSG00000022244	-0.282097	4.36415e-10	1.76802	1.47349	Amacr	protein_coding	alpha-methylacyl-CoA racemase [Source:MGI Symbol;Acc:MGI:1098273]
ENSMUSG00000078941	-1.56528	4.38173e-10	4.83624	3.23612	Ak6	protein_coding	adenylate kinase 6 [Source:MGI Symbol;Acc:MGI:5510732]
ENSMUSG00000022223	-1.18781	4.38274e-10	2.78892	1.58484	Sdr39u1	protein_coding	short chain dehydrogenase/reductase family 39U, member 1 [Source:MGI Symbol;Acc:MGI:1916876]
ENSMUSG00000024286	-0.73507	4.40823e-10	2.9312	2.17809	Ccny	protein_coding	cyclin Y [Source:MGI Symbol;Acc:MGI:1915224]
ENSMUSG00000079478	-1.23548	4.40823e-10	2.12442	0.873728	Sssca1	protein_coding	Sjogren syndrome/scleroderma autoantigen 1 [Source:MGI Symbol;Acc:MGI:1913482]
ENSMUSG00000025421	-1.85201	4.40823e-10	4.18148	2.30372	Hdhd2	protein_coding	haloacid dehalogenase-like hydrolase domain containing 2 [Source:MGI Symbol;Acc:MGI:1924237]
ENSMUSG00000004040	-1.70873	4.41402e-10	3.51605	1.78629	Stat3	protein_coding	signal transducer and activator of transcription 3 [Source:MGI Symbol;Acc:MGI:103038]
ENSMUSG00000030621	-1.0505	4.45724e-10	3.6394	2.5648	Me3	protein_coding	malic enzyme 3, NADP(+)-dependent, mitochondrial [Source:MGI Symbol;Acc:MGI:1916679]
ENSMUSG00000057672	-0.509086	4.46304e-10	1.62815	1.1057	Pkn1	protein_coding	protein kinase N1 [Source:MGI Symbol;Acc:MGI:108022]
ENSMUSG00000038388	-1.62873	4.46898e-10	4.16511	2.51032	Mpp6	protein_coding	membrane protein, palmitoylated 6 (MAGUK p55 subfamily member 6) [Source:MGI Symbol;Acc:MGI:1927340]
ENSMUSG00000029394	-1.27491	4.54842e-10	4.40273	3.09191	Cdk2ap1	protein_coding	CDK2 (cyclin-dependent kinase 2)-associated protein 1 [Source:MGI Symbol;Acc:MGI:1202069]
ENSMUSG00000039515	-1.14434	4.5514e-10	1.92023	0.761103	Ptpa	protein_coding	protein phosphatase 2 protein activator [Source:MGI Symbol;Acc:MGI:1346006]
ENSMUSG00000038244	-0.696942	4.56322e-10	1.57144	0.862898	Mical2	protein_coding	microtubule associated monooxygenase, calponin and LIM domain containing 2 [Source:MGI Symbol;Acc:MGI:2444947]
ENSMUSG00000041632	-0.984942	4.61453e-10	2.3904	1.39047	Mrps27	protein_coding	mitochondrial ribosomal protein S27 [Source:MGI Symbol;Acc:MGI:1919064]
ENSMUSG00000042312	-1.06302	4.61453e-10	2.49258	1.41393	S100a13	protein_coding	S100 calcium binding protein A13 [Source:MGI Symbol;Acc:MGI:109581]
ENSMUSG00000041560	-1.13189	4.61453e-10	3.32313	2.17001	Nop53	protein_coding	NOP53 ribosome biogenesis factor [Source:MGI Symbol;Acc:MGI:2154441]
ENSMUSG00000024067	-1.68144	4.61453e-10	3.24252	1.5396	Dpy30	protein_coding	dpy-30, histone methyltransferase complex regulatory subunit [Source:MGI Symbol;Acc:MGI:1913560]
ENSMUSG00000073664	-1.27624	4.62866e-10	2.88833	1.59355	Nbeal1	protein_coding	neurobeachin like 1 [Source:MGI Symbol;Acc:MGI:2444343]
ENSMUSG00000051768	-0.757485	4.65062e-10	1.12682	0.348683	Xrcc1	protein_coding	X-ray repair complementing defective repair in Chinese hamster cells 1 [Source:MGI Symbol;Acc:MGI:99137]
ENSMUSG00000029048	-1.29855	4.65675e-10	4.12695	2.79845	Rer1	protein_coding	retention in endoplasmic reticulum sorting receptor 1 [Source:MGI Symbol;Acc:MGI:1915080]
ENSMUSG00000026880	-0.513877	4.66325e-10	1.93415	1.4082	Stom	protein_coding	stomatin [Source:MGI Symbol;Acc:MGI:95403]
ENSMUSG00000020018	-0.522064	4.67726e-10	2.21529	1.67942	Snrpf	protein_coding	small nuclear ribonucleoprotein polypeptide F [Source:MGI Symbol;Acc:MGI:1917128]
ENSMUSG00000047721	-1.63545	4.67726e-10	3.45836	1.80222	Bola2	protein_coding	bolA-like 2 (E. coli) [Source:MGI Symbol;Acc:MGI:1913412]
ENSMUSG00000038936	-1.2879	4.69701e-10	2.83099	1.52604	Sccpdh	protein_coding	saccharopine dehydrogenase (putative) [Source:MGI Symbol;Acc:MGI:1924486]
ENSMUSG00000024146	-0.526967	4.70979e-10	2.10433	1.56301	Cript	protein_coding	cysteine-rich PDZ-binding protein [Source:MGI Symbol;Acc:MGI:1929655]
ENSMUSG00000030447	-1.06948	4.73088e-10	2.271	1.18401	Cyfip1	protein_coding	cytoplasmic FMR1 interacting protein 1 [Source:MGI Symbol;Acc:MGI:1338801]
ENSMUSG00000022841	-1.18466	4.73088e-10	4.14914	2.93548	Ap2m1	protein_coding	adaptor-related protein complex 2, mu 1 subunit [Source:MGI Symbol;Acc:MGI:1298405]
ENSMUSG00000000581	-0.903143	4.73408e-10	3.66163	2.73542	C1d	protein_coding	C1D nuclear receptor co-repressor [Source:MGI Symbol;Acc:MGI:1927354]
ENSMUSG00000022235	-0.744449	4.74067e-10	1.67199	0.912811	Cmbl	protein_coding	carboxymethylenebutenolidase-like (Pseudomonas) [Source:MGI Symbol;Acc:MGI:1916824]
ENSMUSG00000037523	-1.34023	4.76529e-10	3.3875	2.02654	Mavs	protein_coding	mitochondrial antiviral signaling protein [Source:MGI Symbol;Acc:MGI:2444773]
ENSMUSG00000026926	-1.66828	4.80264e-10	4.25739	2.56479	Pmpca	protein_coding	peptidase (mitochondrial processing) alpha [Source:MGI Symbol;Acc:MGI:1918568]
ENSMUSG00000028013	-1.53541	4.83951e-10	4.39595	2.83267	Ppa2	protein_coding	pyrophosphatase (inorganic) 2 [Source:MGI Symbol;Acc:MGI:1922026]
ENSMUSG00000016664	-1.67705	4.86308e-10	6.04241	4.31559	Pacsin2	protein_coding	protein kinase C and casein kinase substrate in neurons 2 [Source:MGI Symbol;Acc:MGI:1345153]
ENSMUSG00000027274	-1.45497	4.87343e-10	5.50859	4.00776	Mkks	protein_coding	McKusick-Kaufman syndrome [Source:MGI Symbol;Acc:MGI:1891836]
ENSMUSG00000037012	-0.997269	4.89892e-10	3.14654	2.12961	Hk1	protein_coding	hexokinase 1 [Source:MGI Symbol;Acc:MGI:96103]
ENSMUSG00000004364	-1.74924	4.92546e-10	6.12779	4.32465	Cul3	protein_coding	cullin 3 [Source:MGI Symbol;Acc:MGI:1347360]
ENSMUSG00000029472	-2.43599	4.92546e-10	6.00761	3.53765	Anapc5	protein_coding	anaphase-promoting complex subunit 5 [Source:MGI Symbol;Acc:MGI:1929722]
ENSMUSG00000054455	-0.776363	4.94991e-10	1.82361	1.03497	Vapb	protein_coding	vesicle-associated membrane protein, associated protein B and C [Source:MGI Symbol;Acc:MGI:1928744]
ENSMUSG00000078880	-0.758547	4.9566e-10	1.49587	0.719662	Gm14308	protein_coding	predicted gene 14308 [Source:MGI Symbol;Acc:MGI:3782921]
ENSMUSG00000038763	-1.1476	4.99213e-10	4.28217	3.10103	Alpk3	protein_coding	alpha-kinase 3 [Source:MGI Symbol;Acc:MGI:2151224]
ENSMUSG00000000631	-2.25561	4.99213e-10	7.36931	5.05568	Myo18a	protein_coding	myosin XVIIIA [Source:MGI Symbol;Acc:MGI:2667185]
ENSMUSG00000024908	-1.10795	5.02226e-10	2.72953	1.60311	Ppp6r3	protein_coding	protein phosphatase 6, regulatory subunit 3 [Source:MGI Symbol;Acc:MGI:1921807]
ENSMUSG00000063524	-0.973922	5.04796e-10	3.43736	2.44271	Eno1	protein_coding	enolase 1, alpha non-neuron [Source:MGI Symbol;Acc:MGI:95393]
ENSMUSG00000092607	-0.833189	5.04844e-10	1.69688	0.851051	Scnm1	protein_coding	sodium channel modifier 1 [Source:MGI Symbol;Acc:MGI:1341284]
ENSMUSG00000092232	-0.561676	5.11337e-10	1.10546	0.52712	Gm20521	protein_coding	predicted gene 20521 [Source:MGI Symbol;Acc:MGI:5141986]
ENSMUSG00000006050	-1.05604	5.1183e-10	3.22655	2.15051	Sra1	protein_coding	steroid receptor RNA activator 1 [Source:MGI Symbol;Acc:MGI:1344414]
ENSMUSG00000015839	-1.06276	5.12861e-10	2.01838	0.94107	Nfe2l2	protein_coding	nuclear factor, erythroid derived 2, like 2 [Source:MGI Symbol;Acc:MGI:108420]
ENSMUSG00000036181	-1.80717	5.15713e-10	4.43177	2.60029	Hist1h1c	protein_coding	histone cluster 1, H1c [Source:MGI Symbol;Acc:MGI:1931526]
ENSMUSG00000029247	-1.44435	5.16303e-10	5.28244	3.7969	Paics	protein_coding	phosphoribosylaminoimidazole carboxylase, phosphoribosylaminoribosylaminoimidazole, succinocarboxamide synthetase [Source:MGI Symbol;Acc:MGI:1914304]
ENSMUSG00000036352	-1.30628	5.19687e-10	3.39214	2.06535	Ubac1	protein_coding	ubiquitin associated domain containing 1 [Source:MGI Symbol;Acc:MGI:1920995]
ENSMUSG00000022433	-0.411117	5.25708e-10	1.11309	0.688821	Csnk1e	protein_coding	casein kinase 1, epsilon [Source:MGI Symbol;Acc:MGI:1351660]
ENSMUSG00000003308	-0.842077	5.27357e-10	3.20712	2.34552	Keap1	protein_coding	kelch-like ECH-associated protein 1 [Source:MGI Symbol;Acc:MGI:1858732]
ENSMUSG00000057229	-1.07978	5.27357e-10	2.10342	1.00748	Dmac2	protein_coding	distal membrane arm assembly complex 2 [Source:MGI Symbol;Acc:MGI:1913599]
ENSMUSG00000029461	-1.43168	5.28071e-10	1.97826	0.5257	Fam168a	protein_coding	family with sequence similarity 168, member A [Source:MGI Symbol;Acc:MGI:2442372]
ENSMUSG00000029655	-0.844073	5.28903e-10	1.35541	0.494329	N4bp2l2	protein_coding	NEDD4 binding protein 2-like 2 [Source:MGI Symbol;Acc:MGI:2687207]
ENSMUSG00000034120	-1.13186	5.31679e-10	3.485	2.33138	Srsf2	protein_coding	serine/arginine-rich splicing factor 2 [Source:MGI Symbol;Acc:MGI:98284]
ENSMUSG00000028461	-0.931581	5.33163e-10	3.47525	2.52232	Ccdc107	protein_coding	coiled-coil domain containing 107 [Source:MGI Symbol;Acc:MGI:1913423]
ENSMUSG00000021832	-1.28159	5.3541e-10	4.53805	3.22132	Psmc6	protein_coding	proteasome (prosome, macropain) 26S subunit, ATPase, 6 [Source:MGI Symbol;Acc:MGI:1914339]
ENSMUSG00000018102	-1.21939	5.36104e-10	4.22145	2.96955	Hist1h2bc	protein_coding	histone cluster 1, H2bc [Source:MGI Symbol;Acc:MGI:1915274]
ENSMUSG00000036707	-1.20644	5.366e-10	3.69081	2.46125	Cab39	protein_coding	calcium binding protein 39 [Source:MGI Symbol;Acc:MGI:107438]
ENSMUSG00000035642	-2.39942	5.39897e-10	6.87578	4.43048	Aamdc	protein_coding	adipogenesis associated Mth938 domain containing [Source:MGI Symbol;Acc:MGI:1913523]
ENSMUSG00000059586	-0.568119	5.40634e-10	1.58664	1.00284	Nsmce2	protein_coding	NSE2/MMS21 homolog, SMC5-SMC6 complex SUMO ligase [Source:MGI Symbol;Acc:MGI:1915751]
ENSMUSG00000001441	-1.4157	5.40634e-10	4.12567	2.68401	Npepps	protein_coding	aminopeptidase puromycin sensitive [Source:MGI Symbol;Acc:MGI:1101358]
ENSMUSG00000075376	-1.39428	5.49441e-10	2.63044	1.21641	Rc3h2	protein_coding	ring finger and CCCH-type zinc finger domains 2 [Source:MGI Symbol;Acc:MGI:2442789]
ENSMUSG00000029062	-1.18515	5.50614e-10	3.48865	2.28223	Cdk11b	protein_coding	cyclin-dependent kinase 11B [Source:MGI Symbol;Acc:MGI:88353]
ENSMUSG00000032171	-1.03547	5.54749e-10	3.54368	2.48553	Pin1	protein_coding	protein (peptidyl-prolyl cis/trans isomerase) NIMA-interacting 1 [Source:MGI Symbol;Acc:MGI:1346036]
ENSMUSG00000022314	-1.07733	5.56069e-10	2.19413	1.10216	Rad21	protein_coding	RAD21 cohesin complex component [Source:MGI Symbol;Acc:MGI:108016]
ENSMUSG00000063273	-1.48482	5.59909e-10	4.16315	2.6531	Naa15	protein_coding	N(alpha)-acetyltransferase 15, NatA auxiliary subunit [Source:MGI Symbol;Acc:MGI:1922088]
ENSMUSG00000031347	-1.33549	5.6115e-10	2.33426	0.980346	Cetn2	protein_coding	centrin 2 [Source:MGI Symbol;Acc:MGI:1347085]
ENSMUSG00000018381	-0.266048	5.64868e-10	0.608868	0.331901	Abi3	protein_coding	ABI gene family, member 3 [Source:MGI Symbol;Acc:MGI:1913860]
ENSMUSG00000020744	-0.747974	5.65091e-10	1.46776	0.702512	Slc25a19	protein_coding	solute carrier family 25 (mitochondrial thiamine pyrophosphate carrier), member 19 [Source:MGI Symbol;Acc:MGI:1914533]
ENSMUSG00000022797	-1.13748	5.66796e-10	2.35594	1.20239	Tfrc	protein_coding	transferrin receptor [Source:MGI Symbol;Acc:MGI:98822]
ENSMUSG00000052684	-0.880979	5.68212e-10	2.53491	1.63789	Jun	protein_coding	jun proto-oncogene [Source:MGI Symbol;Acc:MGI:96646]
ENSMUSG00000029146	-1.03396	5.68212e-10	1.78438	0.73691	Snx17	protein_coding	sorting nexin 17 [Source:MGI Symbol;Acc:MGI:2387801]
ENSMUSG00000019864	-1.25403	5.68504e-10	3.02595	1.75327	Rtn4ip1	protein_coding	reticulon 4 interacting protein 1 [Source:MGI Symbol;Acc:MGI:2178759]
ENSMUSG00000015337	-0.856328	5.71517e-10	3.35241	2.47498	Endog	protein_coding	endonuclease G [Source:MGI Symbol;Acc:MGI:1261433]
ENSMUSG00000036275	-1.37606	5.72619e-10	3.79844	2.39937	9530068E07Rik	protein_coding	RIKEN cDNA 9530068E07 gene [Source:MGI Symbol;Acc:MGI:2654705]
ENSMUSG00000054364	-0.74208	5.87528e-10	1.96236	1.20798	Rhob	protein_coding	ras homolog family member B [Source:MGI Symbol;Acc:MGI:107949]
ENSMUSG00000028277	-0.687036	5.94882e-10	1.3788	0.676915	Ube2j1	protein_coding	ubiquitin-conjugating enzyme E2J 1 [Source:MGI Symbol;Acc:MGI:1926245]
ENSMUSG00000008429	-0.69024	5.94882e-10	1.15049	0.44409	Herpud2	protein_coding	HERPUD family member 2 [Source:MGI Symbol;Acc:MGI:1915393]
ENSMUSG00000025439	-0.821934	5.94882e-10	1.49308	0.655742	Clns1a	protein_coding	chloride channel, nucleotide-sensitive, 1A [Source:MGI Symbol;Acc:MGI:109638]
ENSMUSG00000015189	-0.851091	5.94882e-10	1.57756	0.711446	Casd1	protein_coding	CAS1 domain containing 1 [Source:MGI Symbol;Acc:MGI:2384865]
ENSMUSG00000038467	-1.27815	5.96938e-10	3.15751	1.86064	Chmp4b	protein_coding	charged multivesicular body protein 4B [Source:MGI Symbol;Acc:MGI:1922858]
ENSMUSG00000032534	-1.42442	6.0135e-10	4.09517	2.6458	Cep63	protein_coding	centrosomal protein 63 [Source:MGI Symbol;Acc:MGI:2158560]
ENSMUSG00000043940	-0.5633	6.0377e-10	1.42641	0.849631	Wdfy3	protein_coding	WD repeat and FYVE domain containing 3 [Source:MGI Symbol;Acc:MGI:1096875]
ENSMUSG00000042063	-0.868447	6.05019e-10	1.25799	0.367245	Zfp386	protein_coding	zinc finger protein 386 (Kruppel-like) [Source:MGI Symbol;Acc:MGI:1930708]
ENSMUSG00000095595	-0.758502	6.0639e-10	2.52938	1.75539	Fam177a	protein_coding	family with sequence similarity 177, member A [Source:MGI Symbol;Acc:MGI:1920635]
ENSMUSG00000037851	-1.17081	6.0639e-10	3.09579	1.9049	Iars	protein_coding	isoleucine-tRNA synthetase [Source:MGI Symbol;Acc:MGI:2145219]
ENSMUSG00000034557	-1.38584	6.0639e-10	2.28166	0.876647	Zfyve9	protein_coding	zinc finger, FYVE domain containing 9 [Source:MGI Symbol;Acc:MGI:2652838]
ENSMUSG00000002778	-0.943695	6.09133e-10	3.00943	2.04748	Kdelr1	protein_coding	KDEL (Lys-Asp-Glu-Leu) endoplasmic reticulum protein retention receptor 1 [Source:MGI Symbol;Acc:MGI:1915387]
ENSMUSG00000008690	-1.54668	6.22655e-10	4.68535	3.10811	Ncaph2	protein_coding	non-SMC condensin II complex, subunit H2 [Source:MGI Symbol;Acc:MGI:1289164]
ENSMUSG00000028034	-1.47545	6.24465e-10	2.79302	1.29705	Fubp1	protein_coding	far upstream element (FUSE) binding protein 1 [Source:MGI Symbol;Acc:MGI:1196294]
ENSMUSG00000031145	-0.638645	6.2451e-10	1.52953	0.876437	Prickle3	protein_coding	prickle planar cell polarity protein 3 [Source:MGI Symbol;Acc:MGI:1859635]
ENSMUSG00000084957	-0.722645	6.26461e-10	2.85093	2.11109	Bbip1	protein_coding	BBSome interacting protein 1 [Source:MGI Symbol;Acc:MGI:1913610]
ENSMUSG00000045896	-0.724792	6.28049e-10	2.64798	1.90678	Paip2b	protein_coding	poly(A) binding protein interacting protein 2B [Source:MGI Symbol;Acc:MGI:2386865]
ENSMUSG00000039018	-0.775357	6.28049e-10	1.70771	0.918577	Mtg1	protein_coding	mitochondrial ribosome-associated GTPase 1 [Source:MGI Symbol;Acc:MGI:2685015]
ENSMUSG00000074521	-0.639832	6.30595e-10	1.72216	1.06827	Gm14327	protein_coding	predicted gene 14327 [Source:MGI Symbol;Acc:MGI:3652188]
ENSMUSG00000028420	-0.986907	6.30949e-10	1.91407	0.911179	Tmem38b	protein_coding	transmembrane protein 38B [Source:MGI Symbol;Acc:MGI:1098718]
ENSMUSG00000021456	-0.798478	6.34324e-10	1.37482	0.562679	Fbp2	protein_coding	fructose bisphosphatase 2 [Source:MGI Symbol;Acc:MGI:95491]
ENSMUSG00000024740	-1.18926	6.37482e-10	3.57339	2.36088	Ddb1	protein_coding	damage specific DNA binding protein 1 [Source:MGI Symbol;Acc:MGI:1202384]
ENSMUSG00000020275	-0.726025	6.37596e-10	0.85896	0.114809	Rel	protein_coding	reticuloendotheliosis oncogene [Source:MGI Symbol;Acc:MGI:97897]
ENSMUSG00000030255	-2.05655	6.37596e-10	6.98334	4.87841	Sspn	protein_coding	sarcospan [Source:MGI Symbol;Acc:MGI:1353511]
ENSMUSG00000092360	-0.738984	6.40872e-10	1.12117	0.36681	Gm20441	protein_coding	predicted gene 20441 [Source:MGI Symbol;Acc:MGI:5141906]
ENSMUSG00000004069	-1.67234	6.40872e-10	5.02499	3.31891	Dnaja3	protein_coding	DnaJ heat shock protein family (Hsp40) member A3 [Source:MGI Symbol;Acc:MGI:1933786]
ENSMUSG00000050705	-1.80456	6.40872e-10	5.10784	3.27064	2310061I04Rik	protein_coding	RIKEN cDNA 2310061I04 gene [Source:MGI Symbol;Acc:MGI:1916912]
ENSMUSG00000036932	-1.72513	6.45689e-10	4.03207	2.28358	Aifm1	protein_coding	apoptosis-inducing factor, mitochondrion-associated 1 [Source:MGI Symbol;Acc:MGI:1349419]
ENSMUSG00000022191	-1.20153	6.48632e-10	3.24603	2.0243	Drosha	protein_coding	drosha, ribonuclease type III [Source:MGI Symbol;Acc:MGI:1261425]
ENSMUSG00000024486	-0.411977	6.52702e-10	2.02244	1.59637	Hbegf	protein_coding	heparin-binding EGF-like growth factor [Source:MGI Symbol;Acc:MGI:96070]
ENSMUSG00000034290	-1.45444	6.54997e-10	3.81164	2.33406	Nek9	protein_coding	NIMA (never in mitosis gene a)-related expressed kinase 9 [Source:MGI Symbol;Acc:MGI:2387995]
ENSMUSG00000021877	-0.71322	6.55527e-10	2.09899	1.36894	Arf4	protein_coding	ADP-ribosylation factor 4 [Source:MGI Symbol;Acc:MGI:99433]
ENSMUSG00000071649	-0.623289	6.58117e-10	1.37247	0.736785	B3gat3	protein_coding	beta-1,3-glucuronyltransferase 3 (glucuronosyltransferase I) [Source:MGI Symbol;Acc:MGI:1919977]
ENSMUSG00000032097	-1.1589	6.59619e-10	5.31594	4.10775	Ddx6	protein_coding	DEAD (Asp-Glu-Ala-Asp) box polypeptide 6 [Source:MGI Symbol;Acc:MGI:104976]
ENSMUSG00000037904	-1.82726	6.59619e-10	3.53645	1.68632	Ankrd9	protein_coding	ankyrin repeat domain 9 [Source:MGI Symbol;Acc:MGI:1921501]
ENSMUSG00000069379	-0.636373	6.61711e-10	1.75807	1.10951	Gm4950	protein_coding	predicted pseudogene 4950 [Source:MGI Symbol;Acc:MGI:3649015]
ENSMUSG00000040359	-0.68709	6.61711e-10	1.54728	0.845492	Ufl1	protein_coding	UFM1 specific ligase 1 [Source:MGI Symbol;Acc:MGI:1914740]
ENSMUSG00000027963	-0.935375	6.73025e-10	1.4147	0.45786	Extl2	protein_coding	exostoses (multiple)-like 2 [Source:MGI Symbol;Acc:MGI:1889574]
ENSMUSG00000024811	-1.08649	6.73025e-10	2.18299	1.0812	Tnks2	protein_coding	tankyrase, TRF1-interacting ankyrin-related ADP-ribose polymerase 2 [Source:MGI Symbol;Acc:MGI:1921743]
ENSMUSG00000034075	-1.07849	6.74492e-10	2.5607	1.46569	Zdhhc5	protein_coding	zinc finger, DHHC domain containing 5 [Source:MGI Symbol;Acc:MGI:1923573]
ENSMUSG00000022905	-1.54744	6.74526e-10	4.76551	3.18272	Kpna1	protein_coding	karyopherin (importin) alpha 1 [Source:MGI Symbol;Acc:MGI:103560]
ENSMUSG00000042249	-0.416984	6.76654e-10	0.700795	0.260342	Grk3	protein_coding	G protein-coupled receptor kinase 3 [Source:MGI Symbol;Acc:MGI:87941]
ENSMUSG00000023004	-1.22475	6.76654e-10	4.52355	3.25854	Tuba1b	protein_coding	tubulin, alpha 1B [Source:MGI Symbol;Acc:MGI:107804]
ENSMUSG00000041769	-1.58241	6.78849e-10	2.70141	1.10142	Ppp2r2d	protein_coding	protein phosphatase 2, regulatory subunit B, delta [Source:MGI Symbol;Acc:MGI:1289252]
ENSMUSG00000062963	-1.57322	6.79424e-10	4.08546	2.48742	Ufc1	protein_coding	ubiquitin-fold modifier conjugating enzyme 1 [Source:MGI Symbol;Acc:MGI:1913405]
ENSMUSG00000022858	-1.05791	6.80162e-10	2.2445	1.17057	Tra2b	protein_coding	transformer 2 beta homolog (Drosophila) [Source:MGI Symbol;Acc:MGI:106016]
ENSMUSG00000027510	-0.987059	6.93045e-10	2.68481	1.6811	Rbm38	protein_coding	RNA binding motif protein 38 [Source:MGI Symbol;Acc:MGI:1889294]
ENSMUSG00000034327	-1.05674	6.93993e-10	3.41558	2.33662	Kctd9	protein_coding	potassium channel tetramerisation domain containing 9 [Source:MGI Symbol;Acc:MGI:2145579]
ENSMUSG00000021375	-0.857645	6.94537e-10	3.0499	2.17366	Kif13a	protein_coding	kinesin family member 13A [Source:MGI Symbol;Acc:MGI:1098264]
ENSMUSG00000061650	-0.667667	6.96925e-10	1.77704	1.09667	Med9	protein_coding	mediator complex subunit 9 [Source:MGI Symbol;Acc:MGI:2183151]
ENSMUSG00000021910	-1.66967	6.96925e-10	3.72101	2.02974	Nisch	protein_coding	nischarin [Source:MGI Symbol;Acc:MGI:1928323]
ENSMUSG00000019899	-0.512969	7.0653e-10	1.58955	1.06244	Lama2	protein_coding	laminin, alpha 2 [Source:MGI Symbol;Acc:MGI:99912]
ENSMUSG00000031840	-1.6588	7.06799e-10	2.71113	1.03443	Rab3a	protein_coding	RAB3A, member RAS oncogene family [Source:MGI Symbol;Acc:MGI:97843]
ENSMUSG00000026739	-1.36536	7.06947e-10	2.63456	1.25026	Bmi1	protein_coding	Bmi1 polycomb ring finger oncogene [Source:MGI Symbol;Acc:MGI:88174]
ENSMUSG00000068206	-1.09427	7.06958e-10	1.79253	0.682642	Pick1	protein_coding	protein interacting with C kinase 1 [Source:MGI Symbol;Acc:MGI:894645]
ENSMUSG00000101523	-0.883137	7.09153e-10	2.71629	1.81655	Gm10031	protein_coding	predicted pseudogene 10031 [Source:MGI Symbol;Acc:MGI:3704198]
ENSMUSG00000054027	-1.32035	7.09153e-10	2.50048	1.16569	Nt5dc3	protein_coding	5'-nucleotidase domain containing 3 [Source:MGI Symbol;Acc:MGI:3513266]
ENSMUSG00000021610	-1.23828	7.11822e-10	2.04059	0.788732	Clptm1l	protein_coding	CLPTM1-like [Source:MGI Symbol;Acc:MGI:2442892]
ENSMUSG00000033228	-1.16101	7.15933e-10	3.30023	2.11919	Scaf11	protein_coding	SR-related CTD-associated factor 11 [Source:MGI Symbol;Acc:MGI:1919443]
ENSMUSG00000038848	-0.840345	7.24814e-10	1.57087	0.717603	Ythdf1	protein_coding	YTH domain family 1 [Source:MGI Symbol;Acc:MGI:1917431]
ENSMUSG00000016308	-1.73173	7.27506e-10	3.45624	1.7039	Ube2a	protein_coding	ubiquitin-conjugating enzyme E2A [Source:MGI Symbol;Acc:MGI:102959]
ENSMUSG00000073609	-0.744311	7.36279e-10	1.38075	0.618461	D2hgdh	protein_coding	D-2-hydroxyglutarate dehydrogenase [Source:MGI Symbol;Acc:MGI:2138209]
ENSMUSG00000029007	-0.414444	7.36707e-10	1.7624	1.33527	Agtrap	protein_coding	angiotensin II, type I receptor-associated protein [Source:MGI Symbol;Acc:MGI:1339977]
ENSMUSG00000026798	-0.595003	7.38112e-10	1.36625	0.758902	Coq4	protein_coding	coenzyme Q4 [Source:MGI Symbol;Acc:MGI:1098826]
ENSMUSG00000005625	-1.22228	7.41969e-10	5.40039	4.12837	Psmd4	protein_coding	proteasome (prosome, macropain) 26S subunit, non-ATPase, 4 [Source:MGI Symbol;Acc:MGI:1201670]
ENSMUSG00000034160	-1.37507	7.41969e-10	2.05196	0.665814	Ogt	protein_coding	O-linked N-acetylglucosamine (GlcNAc) transferase (UDP-N-acetylglucosamine:polypeptide-N-acetylglucosaminyl transferase) [Source:MGI Symbol;Acc:MGI:1339639]
ENSMUSG00000028221	-1.0453	7.47156e-10	1.4169	0.35328	Tmem55a	protein_coding	transmembrane protein 55A [Source:MGI Symbol;Acc:MGI:1919769]
ENSMUSG00000013997	-0.871755	7.48857e-10	2.36783	1.47956	Nit1	protein_coding	nitrilase 1 [Source:MGI Symbol;Acc:MGI:1350916]
ENSMUSG00000036835	-1.68962	7.574e-10	3.12889	1.42029	Psenen	protein_coding	presenilin enhancer gamma secretase subunit [Source:MGI Symbol;Acc:MGI:1913590]
ENSMUSG00000020268	-0.0301855	7.61265e-10	1.3782	1.33831	Lyrm7	protein_coding	LYR motif containing 7 [Source:MGI Symbol;Acc:MGI:1922780]
ENSMUSG00000030103	-1.02047	7.62539e-10	4.5656	3.49617	Bhlhe40	protein_coding	basic helix-loop-helix family, member e40 [Source:MGI Symbol;Acc:MGI:1097714]
ENSMUSG00000029028	-0.700447	7.66459e-10	1.45682	0.739114	Lrrc47	protein_coding	leucine rich repeat containing 47 [Source:MGI Symbol;Acc:MGI:1920196]
ENSMUSG00000021096	-1.51233	7.73373e-10	5.04156	3.48934	Ppm1a	protein_coding	protein phosphatase 1A, magnesium dependent, alpha isoform [Source:MGI Symbol;Acc:MGI:99878]
ENSMUSG00000034042	-0.924055	7.77531e-10	2.58809	1.64724	Gpbp1l1	protein_coding	GC-rich promoter binding protein 1-like 1 [Source:MGI Symbol;Acc:MGI:1924360]
ENSMUSG00000018882	-0.926089	7.81964e-10	4.22033	3.25865	Mrpl45	protein_coding	mitochondrial ribosomal protein L45 [Source:MGI Symbol;Acc:MGI:1914286]
ENSMUSG00000027002	-1.41165	7.88096e-10	2.52541	1.09636	Nckap1	protein_coding	NCK-associated protein 1 [Source:MGI Symbol;Acc:MGI:1355333]
ENSMUSG00000044018	-1.09254	7.90911e-10	3.26777	2.15543	Mrpl50	protein_coding	mitochondrial ribosomal protein L50 [Source:MGI Symbol;Acc:MGI:107329]
ENSMUSG00000053012	-1.45876	7.94269e-10	4.23841	2.7542	Krcc1	protein_coding	lysine-rich coiled-coil 1 [Source:MGI Symbol;Acc:MGI:1889377]
ENSMUSG00000061755	-1.59296	8.0829e-10	3.77555	2.16011	Bod1l	protein_coding	biorientation of chromosomes in cell division 1-like [Source:MGI Symbol;Acc:MGI:2444804]
ENSMUSG00000044786	-1.65539	8.0829e-10	3.9891	2.31088	Zfp36	protein_coding	zinc finger protein 36 [Source:MGI Symbol;Acc:MGI:99180]
ENSMUSG00000015790	-0.342243	8.09126e-10	1.34827	0.99448	Surf1	protein_coding	surfeit gene 1 [Source:MGI Symbol;Acc:MGI:98443]
ENSMUSG00000006715	-1.69817	8.17859e-10	4.55478	2.82903	Gmnn	protein_coding	geminin [Source:MGI Symbol;Acc:MGI:1927344]
ENSMUSG00000024805	-1.67204	8.26443e-10	4.69845	2.99774	Pcgf5	protein_coding	polycomb group ring finger 5 [Source:MGI Symbol;Acc:MGI:1923505]
ENSMUSG00000058446	-0.799518	8.32219e-10	1.68527	0.87213	Znrf2	protein_coding	zinc and ring finger 2 [Source:MGI Symbol;Acc:MGI:1196246]
ENSMUSG00000027076	-1.06274	8.32219e-10	3.20277	2.12057	Timm10	protein_coding	translocase of inner mitochondrial membrane 10 [Source:MGI Symbol;Acc:MGI:1353429]
ENSMUSG00000056209	-0.284033	8.35075e-10	0.508212	0.209453	Npm3	protein_coding	nucleoplasmin 3 [Source:MGI Symbol;Acc:MGI:894653]
ENSMUSG00000020962	-0.859572	8.41452e-10	1.34271	0.466691	Gtf2a1	protein_coding	general transcription factor II A, 1 [Source:MGI Symbol;Acc:MGI:1933277]
ENSMUSG00000039354	-1.09157	8.42591e-10	1.74948	0.639856	Smarcal1	protein_coding	SWI/SNF related matrix associated, actin dependent regulator of chromatin, subfamily a-like 1 [Source:MGI Symbol;Acc:MGI:1859183]
ENSMUSG00000042680	-0.915417	8.45301e-10	1.13886	0.20834	Garem1	protein_coding	GRB2 associated regulator of MAPK1 subtype 1 [Source:MGI Symbol;Acc:MGI:2685790]
ENSMUSG00000021190	-0.531649	8.46082e-10	1.43164	0.88548	Lgmn	protein_coding	legumain [Source:MGI Symbol;Acc:MGI:1330838]
ENSMUSG00000022217	-0.971349	8.48779e-10	2.62916	1.642	Emc9	protein_coding	ER membrane protein complex subunit 9 [Source:MGI Symbol;Acc:MGI:1934682]
ENSMUSG00000022427	-1.26962	8.49353e-10	3.59606	2.30464	Tomm22	protein_coding	translocase of outer mitochondrial membrane 22 homolog (yeast) [Source:MGI Symbol;Acc:MGI:2450248]
ENSMUSG00000032010	-1.30527	8.49353e-10	3.93133	2.601	Usp2	protein_coding	ubiquitin specific peptidase 2 [Source:MGI Symbol;Acc:MGI:1858178]
ENSMUSG00000026172	-1.35733	8.55188e-10	2.39161	1.01658	Bcs1l	protein_coding	BCS1-like (yeast) [Source:MGI Symbol;Acc:MGI:1914071]
ENSMUSG00000009291	-0.807092	8.67187e-10	2.52828	1.70544	Pttg1ip	protein_coding	pituitary tumor-transforming 1 interacting protein [Source:MGI Symbol;Acc:MGI:2652132]
ENSMUSG00000020132	-1.23069	8.73815e-10	4.08858	2.83055	Rab21	protein_coding	RAB21, member RAS oncogene family [Source:MGI Symbol;Acc:MGI:894308]
ENSMUSG00000056153	-1.11762	8.76433e-10	1.94175	0.804873	Socs6	protein_coding	suppressor of cytokine signaling 6 [Source:MGI Symbol;Acc:MGI:1924885]
ENSMUSG00000020541	-1.54935	8.76433e-10	3.16381	1.59491	Tom1l1	protein_coding	target of myb1-like 1 (chicken) [Source:MGI Symbol;Acc:MGI:1919193]
ENSMUSG00000032897	-1.53359	8.94373e-10	2.66734	1.11577	Nfyc	protein_coding	nuclear transcription factor-Y gamma [Source:MGI Symbol;Acc:MGI:107901]
ENSMUSG00000020409	-1.31495	8.96978e-10	2.11097	0.778007	Slu7	protein_coding	SLU7 splicing factor homolog (S. cerevisiae) [Source:MGI Symbol;Acc:MGI:2385598]
ENSMUSG00000015671	-1.34134	8.96978e-10	4.40256	3.03187	Psma2	protein_coding	proteasome (prosome, macropain) subunit, alpha type 2 [Source:MGI Symbol;Acc:MGI:104885]
ENSMUSG00000057421	-0.942477	8.98454e-10	2.70285	1.74238	Las1l	protein_coding	LAS1-like (S. cerevisiae) [Source:MGI Symbol;Acc:MGI:1923380]
ENSMUSG00000022332	-0.804437	9.05475e-10	2.13484	1.31658	Khdrbs3	protein_coding	KH domain containing, RNA binding, signal transduction associated 3 [Source:MGI Symbol;Acc:MGI:1313312]
ENSMUSG00000003068	-1.60704	9.05475e-10	3.98313	2.35286	Stk11	protein_coding	serine/threonine kinase 11 [Source:MGI Symbol;Acc:MGI:1341870]
ENSMUSG00000020859	-2.25189	9.05475e-10	5.63801	3.35337	Spag9	protein_coding	sperm associated antigen 9 [Source:MGI Symbol;Acc:MGI:1918084]
ENSMUSG00000032306	-0.264834	9.05994e-10	2.71794	2.4374	Mpi	protein_coding	mannose phosphate isomerase [Source:MGI Symbol;Acc:MGI:97075]
ENSMUSG00000024077	-0.806957	9.06746e-10	1.67311	0.851399	Strn	protein_coding	striatin, calmodulin binding protein [Source:MGI Symbol;Acc:MGI:1333757]
ENSMUSG00000029364	-1.24309	9.08075e-10	3.86743	2.59601	Wsb2	protein_coding	WD repeat and SOCS box-containing 2 [Source:MGI Symbol;Acc:MGI:2144041]
ENSMUSG00000028249	-0.797669	9.08275e-10	2.60827	1.79385	Sdcbp	protein_coding	syndecan binding protein [Source:MGI Symbol;Acc:MGI:1337026]
ENSMUSG00000020850	-1.08504	9.09142e-10	1.94437	0.843848	Prpf8	protein_coding	pre-mRNA processing factor 8 [Source:MGI Symbol;Acc:MGI:2179381]
ENSMUSG00000025221	-1.24211	9.11792e-10	4.01137	2.74446	Kcnip2	protein_coding	Kv channel-interacting protein 2 [Source:MGI Symbol;Acc:MGI:2135916]
ENSMUSG00000036333	-1.06449	9.18111e-10	1.39128	0.308276	Kidins220	protein_coding	kinase D-interacting substrate 220 [Source:MGI Symbol;Acc:MGI:1924730]
ENSMUSG00000014551	-0.482427	9.2798e-10	3.26907	2.76781	Mrps25	protein_coding	mitochondrial ribosomal protein S25 [Source:MGI Symbol;Acc:MGI:1928140]
ENSMUSG00000073700	-1.39946	9.2798e-10	2.73373	1.31871	Klhl21	protein_coding	kelch-like 21 [Source:MGI Symbol;Acc:MGI:1919288]
ENSMUSG00000039219	-1.81875	9.2798e-10	3.1288	1.28916	Arid4b	protein_coding	AT rich interactive domain 4B (RBP1-like) [Source:MGI Symbol;Acc:MGI:2137512]
ENSMUSG00000038028	-0.56156	9.28688e-10	2.7437	2.16575	Tigar	protein_coding	Trp53 induced glycolysis repulatory phosphatase [Source:MGI Symbol;Acc:MGI:2442752]
ENSMUSG00000031146	-0.445252	9.33067e-10	1.37274	0.914377	Plp2	protein_coding	proteolipid protein 2 [Source:MGI Symbol;Acc:MGI:1298382]
ENSMUSG00000040591	-1.20458	9.34414e-10	2.71985	1.49743	1110051M20Rik	protein_coding	RIKEN cDNA 1110051M20 gene [Source:MGI Symbol;Acc:MGI:1915079]
ENSMUSG00000004071	-1.68771	9.35146e-10	4.38946	2.67553	Cdip1	protein_coding	cell death inducing Trp53 target 1 [Source:MGI Symbol;Acc:MGI:1913876]
ENSMUSG00000071866	-1.71901	9.37684e-10	4.68757	2.94041	Ppia	protein_coding	peptidylprolyl isomerase A [Source:MGI Symbol;Acc:MGI:97749]
ENSMUSG00000021112	-0.617508	9.41838e-10	1.47367	0.840987	Mpp5	protein_coding	membrane protein, palmitoylated 5 (MAGUK p55 subfamily member 5) [Source:MGI Symbol;Acc:MGI:1927339]
ENSMUSG00000029815	-1.07804	9.44589e-10	2.74802	1.65325	Malsu1	protein_coding	mitochondrial assembly of ribosomal large subunit 1 [Source:MGI Symbol;Acc:MGI:1922843]
ENSMUSG00000021597	-1.26833	9.45204e-10	2.37006	1.08615	Slf1	protein_coding	SMC5-SMC6 complex localization factor 1 [Source:MGI Symbol;Acc:MGI:2145448]
ENSMUSG00000031451	-0.686389	9.46125e-10	1.57236	0.872951	Gas6	protein_coding	growth arrest specific 6 [Source:MGI Symbol;Acc:MGI:95660]
ENSMUSG00000062203	-1.83805	9.54298e-10	3.18761	1.331	Gspt1	protein_coding	G1 to S phase transition 1 [Source:MGI Symbol;Acc:MGI:1316728]
ENSMUSG00000025060	-1.76997	9.56662e-10	5.58831	3.77662	Slk	protein_coding	STE20-like kinase [Source:MGI Symbol;Acc:MGI:103241]
ENSMUSG00000027805	-0.884383	9.69551e-10	2.88922	1.9865	Pfn2	protein_coding	profilin 2 [Source:MGI Symbol;Acc:MGI:97550]
ENSMUSG00000019947	-0.901768	9.74258e-10	1.4861	0.566683	Arid5b	protein_coding	AT rich interactive domain 5B (MRF1-like) [Source:MGI Symbol;Acc:MGI:2175912]
ENSMUSG00000047205	-1.11085	9.79268e-10	2.15669	1.03105	Dusp18	protein_coding	dual specificity phosphatase 18 [Source:MGI Symbol;Acc:MGI:1922469]
ENSMUSG00000001687	-1.30794	9.81502e-10	3.60693	2.27724	Ubl3	protein_coding	ubiquitin-like 3 [Source:MGI Symbol;Acc:MGI:1344373]
ENSMUSG00000049115	-1.14588	9.83275e-10	2.47817	1.31639	Agtr1a	protein_coding	angiotensin II receptor, type 1a [Source:MGI Symbol;Acc:MGI:87964]
ENSMUSG00000036810	-0.806427	9.85183e-10	1.30815	0.486301	Cnep1r1	protein_coding	CTD nuclear envelope phosphatase 1 regulatory subunit 1 [Source:MGI Symbol;Acc:MGI:1921981]
ENSMUSG00000028869	-0.500726	9.89631e-10	1.71096	1.1967	Gnl2	protein_coding	guanine nucleotide binding protein-like 2 (nucleolar) [Source:MGI Symbol;Acc:MGI:2385207]
ENSMUSG00000001627	-1.18127	9.91755e-10	2.37757	1.18173	Ifrd1	protein_coding	interferon-related developmental regulator 1 [Source:MGI Symbol;Acc:MGI:1316717]
ENSMUSG00000035437	-1.21311	9.95127e-10	2.64484	1.41394	Rabgap1	protein_coding	RAB GTPase activating protein 1 [Source:MGI Symbol;Acc:MGI:2385139]
ENSMUSG00000035637	-1.23358	9.95127e-10	2.49963	1.25024	Grhpr	protein_coding	glyoxylate reductase/hydroxypyruvate reductase [Source:MGI Symbol;Acc:MGI:1923488]
ENSMUSG00000058704	-0.917	9.95197e-10	2.55775	1.62522	Memo1	protein_coding	mediator of cell motility 1 [Source:MGI Symbol;Acc:MGI:1924140]
ENSMUSG00000028563	-1.68543	1.00184e-09	4.05621	2.34754	Tm2d1	protein_coding	TM2 domain containing 1 [Source:MGI Symbol;Acc:MGI:2137022]
ENSMUSG00000019863	-0.423179	1.00578e-09	1.04408	0.607573	Qrsl1	protein_coding	glutaminyl-tRNA synthase (glutamine-hydrolyzing)-like 1 [Source:MGI Symbol;Acc:MGI:1923813]
ENSMUSG00000031207	-0.717642	1.00578e-09	1.29864	0.565553	Msn	protein_coding	moesin [Source:MGI Symbol;Acc:MGI:97167]
ENSMUSG00000024474	-0.679498	1.00837e-09	3.64751	2.94532	Ik	protein_coding	IK cytokine [Source:MGI Symbol;Acc:MGI:1345142]
ENSMUSG00000010608	-0.821451	1.00837e-09	3.42081	2.57834	Rbm25	protein_coding	RNA binding motif protein 25 [Source:MGI Symbol;Acc:MGI:1914289]
ENSMUSG00000032468	-1.01232	1.01058e-09	1.57366	0.546377	Armc8	protein_coding	armadillo repeat containing 8 [Source:MGI Symbol;Acc:MGI:1921375]
ENSMUSG00000037933	-1.75988	1.01398e-09	3.73358	1.95177	Bicd2	protein_coding	bicaudal D homolog 2 (Drosophila) [Source:MGI Symbol;Acc:MGI:1924145]
ENSMUSG00000006276	-0.628532	1.02053e-09	1.23705	0.592945	Eps15l1	protein_coding	epidermal growth factor receptor pathway substrate 15-like 1 [Source:MGI Symbol;Acc:MGI:104582]
ENSMUSG00000069135	-1.51132	1.02573e-09	2.52919	1.00262	Fgfr1op	protein_coding	Fgfr1 oncogene partner [Source:MGI Symbol;Acc:MGI:1922546]
ENSMUSG00000037706	-1.36234	1.03044e-09	4.34959	2.95638	Cd81	protein_coding	CD81 antigen [Source:MGI Symbol;Acc:MGI:1096398]
ENSMUSG00000079588	-1.30639	1.0348e-09	3.8956	2.56392	Tmem182	protein_coding	transmembrane protein 182 [Source:MGI Symbol;Acc:MGI:1923725]
ENSMUSG00000045954	-0.929127	1.04335e-09	2.08199	1.13636	Cavin2	protein_coding	caveolae associated 2 [Source:MGI Symbol;Acc:MGI:99513]
ENSMUSG00000001508	-1.55543	1.04419e-09	5.16307	3.56917	Sgca	protein_coding	sarcoglycan, alpha (dystrophin-associated glycoprotein) [Source:MGI Symbol;Acc:MGI:894698]
ENSMUSG00000039873	-0.681284	1.04877e-09	2.19935	1.50423	Neurl2	protein_coding	neuralized E3 ubiquitin protein ligase 2 [Source:MGI Symbol;Acc:MGI:3043305]
ENSMUSG00000038965	-1.19403	1.04898e-09	4.29013	3.06962	Ube2l3	protein_coding	ubiquitin-conjugating enzyme E2L 3 [Source:MGI Symbol;Acc:MGI:109240]
ENSMUSG00000021286	-0.899584	1.05007e-09	2.27456	1.35857	Zfyve21	protein_coding	zinc finger, FYVE domain containing 21 [Source:MGI Symbol;Acc:MGI:1915770]
ENSMUSG00000037003	-1.1172	1.05374e-09	1.76681	0.634765	Tns2	protein_coding	tensin 2 [Source:MGI Symbol;Acc:MGI:2387586]
ENSMUSG00000007721	-0.218936	1.06981e-09	3.08973	2.85354	Ccdc124	protein_coding	coiled-coil domain containing 124 [Source:MGI Symbol;Acc:MGI:1916403]
ENSMUSG00000038429	-0.893904	1.07379e-09	2.69493	1.78462	Usp5	protein_coding	ubiquitin specific peptidase 5 (isopeptidase T) [Source:MGI Symbol;Acc:MGI:1347343]
ENSMUSG00000025135	-1.02005	1.07379e-09	2.6133	1.57716	Anapc11	protein_coding	anaphase promoting complex subunit 11 [Source:MGI Symbol;Acc:MGI:1913406]
ENSMUSG00000031969	-1.27666	1.07379e-09	3.18642	1.89076	Acad8	protein_coding	acyl-Coenzyme A dehydrogenase family, member 8 [Source:MGI Symbol;Acc:MGI:1914198]
ENSMUSG00000021669	-0.97697	1.076e-09	1.99574	1.00014	Col4a3bp	protein_coding	collagen, type IV, alpha 3 (Goodpasture antigen) binding protein [Source:MGI Symbol;Acc:MGI:1915268]
ENSMUSG00000014243	-0.98785	1.076e-09	2.03234	1.03024	Zswim7	protein_coding	zinc finger SWIM-type containing 7 [Source:MGI Symbol;Acc:MGI:1916997]
ENSMUSG00000072640	-1.14986	1.07715e-09	2.96432	1.79684	Lyrm9	protein_coding	LYR motif containing 9 [Source:MGI Symbol;Acc:MGI:1913524]
ENSMUSG00000002763	-0.798919	1.0791e-09	1.75392	0.942185	Pex6	protein_coding	peroxisomal biogenesis factor 6 [Source:MGI Symbol;Acc:MGI:2385054]
ENSMUSG00000029199	-1.22465	1.08009e-09	3.87846	2.6301	Lias	protein_coding	lipoic acid synthetase [Source:MGI Symbol;Acc:MGI:1934604]
ENSMUSG00000022095	-0.841597	1.08144e-09	1.67698	0.823232	Fam160b2	protein_coding	family with sequence similarity 160, member B2 [Source:MGI Symbol;Acc:MGI:3036290]
ENSMUSG00000052512	-0.466582	1.08212e-09	1.11624	0.635463	Nav2	protein_coding	neuron navigator 2 [Source:MGI Symbol;Acc:MGI:2183691]
ENSMUSG00000029056	-0.731432	1.08378e-09	0.939274	0.190389	Pank4	protein_coding	pantothenate kinase 4 [Source:MGI Symbol;Acc:MGI:2387466]
ENSMUSG00000033294	-0.693107	1.08464e-09	0.833561	0.12914	Noc4l	protein_coding	NOC4 like [Source:MGI Symbol;Acc:MGI:2140843]
ENSMUSG00000075254	-1.01306	1.08464e-09	1.28172	0.252802	Heg1	protein_coding	heart development protein with EGF-like domains 1 [Source:MGI Symbol;Acc:MGI:1924696]
ENSMUSG00000090841	-1.79192	1.08862e-09	4.72446	2.90449	Myl6	protein_coding	myosin, light polypeptide 6, alkali, smooth muscle and non-muscle [Source:MGI Symbol;Acc:MGI:109318]
ENSMUSG00000017817	-1.03902	1.09414e-09	3.78953	2.72443	Jph2	protein_coding	junctophilin 2 [Source:MGI Symbol;Acc:MGI:1891496]
ENSMUSG00000042198	-2.2387	1.10625e-09	6.98302	4.6947	Chchd7	protein_coding	coiled-coil-helix-coiled-coil-helix domain containing 7 [Source:MGI Symbol;Acc:MGI:1913683]
ENSMUSG00000025571	-1.26642	1.11511e-09	1.75594	0.473336	Tnrc6c	protein_coding	trinucleotide repeat containing 6C [Source:MGI Symbol;Acc:MGI:2443265]
ENSMUSG00000028710	-1.52088	1.11957e-09	4.06632	2.52	Atpaf1	protein_coding	ATP synthase mitochondrial F1 complex assembly factor 1 [Source:MGI Symbol;Acc:MGI:2180560]
ENSMUSG00000056880	-0.0937239	1.12047e-09	0.53031	0.428622	Gadl1	protein_coding	glutamate decarboxylase-like 1 [Source:MGI Symbol;Acc:MGI:1920998]
ENSMUSG00000093989	-1.40107	1.12546e-09	3.55346	2.13159	Rnasek	protein_coding	ribonuclease, RNase K [Source:MGI Symbol;Acc:MGI:106369]
ENSMUSG00000019988	-0.883549	1.12664e-09	1.48553	0.588837	Nedd1	protein_coding	neural precursor cell expressed, developmentally down-regulated gene 1 [Source:MGI Symbol;Acc:MGI:97293]
ENSMUSG00000000325	-1.31415	1.13088e-09	5.21962	3.86837	Arvcf	protein_coding	armadillo repeat gene deleted in velocardiofacial syndrome [Source:MGI Symbol;Acc:MGI:109620]
ENSMUSG00000020720	-1.67215	1.13088e-09	5.574	3.85535	Psmd12	protein_coding	proteasome (prosome, macropain) 26S subunit, non-ATPase, 12 [Source:MGI Symbol;Acc:MGI:1914247]
ENSMUSG00000034620	-0.967553	1.1316e-09	2.52624	1.54202	Tmem5	protein_coding	transmembrane protein 5 [Source:MGI Symbol;Acc:MGI:2384919]
ENSMUSG00000018411	-1.11492	1.13602e-09	3.70224	2.56514	Mapt	protein_coding	microtubule-associated protein tau [Source:MGI Symbol;Acc:MGI:97180]
ENSMUSG00000048175	-1.1128	1.13793e-09	2.59859	1.46984	Asb8	protein_coding	ankyrin repeat and SOCS box-containing 8 [Source:MGI Symbol;Acc:MGI:1925791]
ENSMUSG00000034345	-1.87704	1.14064e-09	4.52828	2.62536	Gtf2h5	protein_coding	general transcription factor IIH, polypeptide 5 [Source:MGI Symbol;Acc:MGI:107227]
ENSMUSG00000024098	-1.14724	1.14171e-09	3.10718	1.94142	Twsg1	protein_coding	twisted gastrulation BMP signaling modulator 1 [Source:MGI Symbol;Acc:MGI:2137520]
ENSMUSG00000002477	-0.732467	1.17043e-09	1.67225	0.926013	Snrpd1	protein_coding	small nuclear ribonucleoprotein D1 [Source:MGI Symbol;Acc:MGI:98344]
ENSMUSG00000026966	-1.13558	1.17809e-09	2.04714	0.896705	Ssna1	protein_coding	SS nuclear autoantigen 1 [Source:MGI Symbol;Acc:MGI:1915725]
ENSMUSG00000020257	-0.584073	1.20171e-09	1.25911	0.660338	Wdr82	protein_coding	WD repeat domain containing 82 [Source:MGI Symbol;Acc:MGI:1924555]
ENSMUSG00000028070	-0.745774	1.20276e-09	3.32469	2.5557	Naxe	protein_coding	NAD(P)HX epimerase [Source:MGI Symbol;Acc:MGI:2180167]
ENSMUSG00000078652	-0.674295	1.21118e-09	1.81848	1.1304	Psme3	protein_coding	proteaseome (prosome, macropain) activator subunit 3 (PA28 gamma, Ki) [Source:MGI Symbol;Acc:MGI:1096366]
ENSMUSG00000026434	-1.3794	1.21237e-09	3.48017	2.0802	Nucks1	protein_coding	nuclear casein kinase and cyclin-dependent kinase substrate 1 [Source:MGI Symbol;Acc:MGI:1934811]
ENSMUSG00000032187	-1.49086	1.21487e-09	3.67915	2.16598	Smarca4	protein_coding	SWI/SNF related, matrix associated, actin dependent regulator of chromatin, subfamily a, member 4 [Source:MGI Symbol;Acc:MGI:88192]
ENSMUSG00000078901	-0.751575	1.21598e-09	1.8853	1.11965	Gm14440	protein_coding	predicted gene 14440 [Source:MGI Symbol;Acc:MGI:3702430]
ENSMUSG00000050029	-0.936133	1.21598e-09	1.64292	0.691841	Rap2c	protein_coding	RAP2C, member of RAS oncogene family [Source:MGI Symbol;Acc:MGI:1919315]
ENSMUSG00000044502	-0.675644	1.21812e-09	4.0064	3.3019	Bod1	protein_coding	biorientation of chromosomes in cell division 1 [Source:MGI Symbol;Acc:MGI:1916806]
ENSMUSG00000015087	-1.08054	1.2266e-09	2.94842	1.8501	Rabl6	protein_coding	RAB, member RAS oncogene family-like 6 [Source:MGI Symbol;Acc:MGI:2442633]
ENSMUSG00000003345	-0.800863	1.22721e-09	3.03738	2.21831	Csnk1g2	protein_coding	casein kinase 1, gamma 2 [Source:MGI Symbol;Acc:MGI:1920014]
ENSMUSG00000032295	-0.907125	1.22721e-09	1.27694	0.345474	Man2c1	protein_coding	mannosidase, alpha, class 2C, member 1 [Source:MGI Symbol;Acc:MGI:1920994]
ENSMUSG00000029071	-0.877847	1.22762e-09	1.63674	0.745152	Dvl1	protein_coding	dishevelled segment polarity protein 1 [Source:MGI Symbol;Acc:MGI:94941]
ENSMUSG00000026603	-1.12472	1.22854e-09	3.76007	2.61081	Smyd2	protein_coding	SET and MYND domain containing 2 [Source:MGI Symbol;Acc:MGI:1915889]
ENSMUSG00000020923	-2.00642	1.23458e-09	3.30682	1.27732	Ubtf	protein_coding	upstream binding transcription factor, RNA polymerase I [Source:MGI Symbol;Acc:MGI:98512]
ENSMUSG00000040459	-1.25236	1.24619e-09	3.28573	2.01401	Arglu1	protein_coding	arginine and glutamate rich 1 [Source:MGI Symbol;Acc:MGI:2442985]
ENSMUSG00000025228	-0.890119	1.25379e-09	2.46966	1.56435	Actr1a	protein_coding	ARP1 actin-related protein 1A, centractin alpha [Source:MGI Symbol;Acc:MGI:1858964]
ENSMUSG00000001151	-1.18197	1.25441e-09	3.31142	2.10943	Pcnt	protein_coding	pericentrin (kendrin) [Source:MGI Symbol;Acc:MGI:102722]
ENSMUSG00000002948	-1.5171	1.25441e-09	2.32608	0.789263	Map2k7	protein_coding	mitogen-activated protein kinase kinase 7 [Source:MGI Symbol;Acc:MGI:1346871]
ENSMUSG00000020366	-1.66667	1.25505e-09	2.74292	1.05713	Mapk9	protein_coding	mitogen-activated protein kinase 9 [Source:MGI Symbol;Acc:MGI:1346862]
ENSMUSG00000030213	-0.806623	1.25607e-09	1.92012	1.09957	Atf7ip	protein_coding	activating transcription factor 7 interacting protein [Source:MGI Symbol;Acc:MGI:1858965]
ENSMUSG00000021546	-1.96115	1.25743e-09	7.32177	5.28874	Hnrnpk	protein_coding	heterogeneous nuclear ribonucleoprotein K [Source:MGI Symbol;Acc:MGI:99894]
ENSMUSG00000020544	-0.662045	1.25932e-09	1.7596	1.08379	Cox11	protein_coding	cytochrome c oxidase assembly protein 11 [Source:MGI Symbol;Acc:MGI:1917052]
ENSMUSG00000059323	-0.978108	1.27341e-09	2.58871	1.59495	Tonsl	protein_coding	tonsoku-like, DNA repair protein [Source:MGI Symbol;Acc:MGI:1919999]
ENSMUSG00000091937	-0.639712	1.28158e-09	1.07893	0.426221	Gm3646	protein_coding	predicted gene 3646 [Source:MGI Symbol;Acc:MGI:3781822]
ENSMUSG00000049327	-1.3175	1.28293e-09	4.83595	3.48156	Kmt5a	protein_coding	lysine methyltransferase 5A [Source:MGI Symbol;Acc:MGI:1915206]
ENSMUSG00000027680	-2.07549	1.28882e-09	7.37389	5.24539	Fxr1	protein_coding	fragile X mental retardation gene 1, autosomal homolog [Source:MGI Symbol;Acc:MGI:104860]
ENSMUSG00000038801	-1.12316	1.30119e-09	2.06594	0.928426	Scgb1c1	protein_coding	secretoglobin, family 1C, member 1 [Source:MGI Symbol;Acc:MGI:2655401]
ENSMUSG00000013833	-1.11008	1.31091e-09	1.39705	0.271504	Med16	protein_coding	mediator complex subunit 16 [Source:MGI Symbol;Acc:MGI:2158394]
ENSMUSG00000033159	-0.865401	1.31959e-09	1.0002	0.115654	Cnppd1	protein_coding	cyclin Pas1/PHO80 domain containing 1 [Source:MGI Symbol;Acc:MGI:1916421]
ENSMUSG00000060739	-1.58003	1.32157e-09	4.66754	3.05883	Nsa2	protein_coding	NSA2 ribosome biogenesis homolog [Source:MGI Symbol;Acc:MGI:1913883]
ENSMUSG00000003099	-0.657671	1.33945e-09	1.29935	0.631169	Ppp5c	protein_coding	protein phosphatase 5, catalytic subunit [Source:MGI Symbol;Acc:MGI:102666]
ENSMUSG00000037857	-1.01611	1.34048e-09	2.02552	0.994402	Nufip2	protein_coding	nuclear fragile X mental retardation protein interacting protein 2 [Source:MGI Symbol;Acc:MGI:1915814]
ENSMUSG00000027010	-1.29288	1.34919e-09	4.95953	3.61678	Slc25a12	protein_coding	solute carrier family 25 (mitochondrial carrier, Aralar), member 12 [Source:MGI Symbol;Acc:MGI:1926080]
ENSMUSG00000001056	-0.240877	1.35407e-09	1.96763	1.71341	Nhp2	protein_coding	NHP2 ribonucleoprotein [Source:MGI Symbol;Acc:MGI:1098547]
ENSMUSG00000026775	-0.703872	1.35407e-09	2.58386	1.86414	Yme1l1	protein_coding	YME1-like 1 (S. cerevisiae) [Source:MGI Symbol;Acc:MGI:1351651]
ENSMUSG00000019883	-0.809927	1.36195e-09	2.10521	1.2792	Echdc1	protein_coding	enoyl Coenzyme A hydratase domain containing 1 [Source:MGI Symbol;Acc:MGI:1277169]
ENSMUSG00000074247	-1.31414	1.38119e-09	2.4401	1.10578	Dda1	protein_coding	DET1 and DDB1 associated 1 [Source:MGI Symbol;Acc:MGI:1913748]
ENSMUSG00000048731	-0.807278	1.38499e-09	0.931367	0.11313	Ggnbp1	protein_coding	gametogenetin binding protein 1 [Source:MGI Symbol;Acc:MGI:3055306]
ENSMUSG00000021500	-1.71838	1.40088e-09	3.15819	1.41987	Ddx46	protein_coding	DEAD (Asp-Glu-Ala-Asp) box polypeptide 46 [Source:MGI Symbol;Acc:MGI:1920895]
ENSMUSG00000024483	-1.27927	1.40609e-09	2.1513	0.856305	Ankhd1	protein_coding	ankyrin repeat and KH domain containing 1 [Source:MGI Symbol;Acc:MGI:1921733]
ENSMUSG00000052253	-0.892364	1.4302e-09	1.8568	0.949293	Zfp622	protein_coding	zinc finger protein 622 [Source:MGI Symbol;Acc:MGI:1289282]
ENSMUSG00000021238	-1.4139	1.43857e-09	4.12896	2.68669	Aldh6a1	protein_coding	aldehyde dehydrogenase family 6, subfamily A1 [Source:MGI Symbol;Acc:MGI:1915077]
ENSMUSG00000040354	-0.842427	1.44774e-09	2.28923	1.43224	Mars	protein_coding	methionine-tRNA synthetase [Source:MGI Symbol;Acc:MGI:1345633]
ENSMUSG00000004945	-0.839484	1.45306e-09	2.67424	1.81886	Tmem242	protein_coding	transmembrane protein 242 [Source:MGI Symbol;Acc:MGI:1917794]
ENSMUSG00000026495	-1.45438	1.45615e-09	5.39504	3.89359	Efcab2	protein_coding	EF-hand calcium binding domain 2 [Source:MGI Symbol;Acc:MGI:1915476]
ENSMUSG00000046876	-0.722193	1.45763e-09	1.28259	0.543218	Atxn1	protein_coding	ataxin 1 [Source:MGI Symbol;Acc:MGI:104783]
ENSMUSG00000040433	-1.26444	1.46301e-09	3.01733	1.73477	Zbtb38	protein_coding	zinc finger and BTB domain containing 38 [Source:MGI Symbol;Acc:MGI:2442866]
ENSMUSG00000025130	-1.12865	1.47011e-09	3.23883	2.09093	P4hb	protein_coding	prolyl 4-hydroxylase, beta polypeptide [Source:MGI Symbol;Acc:MGI:97464]
ENSMUSG00000045613	-1.14617	1.47018e-09	2.90506	1.74112	Chrm2	protein_coding	cholinergic receptor, muscarinic 2, cardiac [Source:MGI Symbol;Acc:MGI:88397]
ENSMUSG00000079562	-0.855036	1.473e-09	2.90375	2.03115	Maea	protein_coding	macrophage erythroblast attacher [Source:MGI Symbol;Acc:MGI:1891748]
ENSMUSG00000004896	-0.810635	1.48134e-09	3.47605	2.64543	Rrnad1	protein_coding	ribosomal RNA adenine dimethylase domain containing 1 [Source:MGI Symbol;Acc:MGI:2387197]
ENSMUSG00000049709	-0.423375	1.48451e-09	1.56252	1.12701	Nlrp10	protein_coding	NLR family, pyrin domain containing 10 [Source:MGI Symbol;Acc:MGI:2444084]
ENSMUSG00000021576	-1.59142	1.48684e-09	2.96049	1.35134	Pdcd6	protein_coding	programmed cell death 6 [Source:MGI Symbol;Acc:MGI:109283]
ENSMUSG00000037270	-1.31038	1.48963e-09	2.526	1.19772	4932438A13Rik	protein_coding	RIKEN cDNA 4932438A13 gene [Source:MGI Symbol;Acc:MGI:2444631]
ENSMUSG00000039048	-1.4117	1.49014e-09	3.07612	1.64546	Foxred1	protein_coding	FAD-dependent oxidoreductase domain containing 1 [Source:MGI Symbol;Acc:MGI:2446262]
ENSMUSG00000006299	-1.0139	1.49536e-09	3.31678	2.28317	Aamp	protein_coding	angio-associated migratory protein [Source:MGI Symbol;Acc:MGI:107809]
ENSMUSG00000020415	-1.33454	1.5019e-09	7.05229	5.64157	Pttg1	protein_coding	pituitary tumor-transforming gene 1 [Source:MGI Symbol;Acc:MGI:1353578]
ENSMUSG00000034442	-0.959215	1.5048e-09	2.13561	1.16226	Trmt5	protein_coding	TRM5 tRNA methyltransferase 5 [Source:MGI Symbol;Acc:MGI:1923607]
ENSMUSG00000053286	-0.531813	1.5078e-09	1.11503	0.568868	Trmt1l	protein_coding	tRNA methyltransferase 1 like [Source:MGI Symbol;Acc:MGI:1916185]
ENSMUSG00000051510	-0.181651	1.51672e-09	1.05458	0.862264	Mafg	protein_coding	v-maf musculoaponeurotic fibrosarcoma oncogene family, protein G (avian) [Source:MGI Symbol;Acc:MGI:96911]
ENSMUSG00000035936	-0.875263	1.51672e-09	2.15708	1.26798	Aldh5a1	protein_coding	aldhehyde dehydrogenase family 5, subfamily A1 [Source:MGI Symbol;Acc:MGI:2441982]
ENSMUSG00000050627	-0.730496	1.51833e-09	1.73382	0.991173	Gpd1l	protein_coding	glycerol-3-phosphate dehydrogenase 1-like [Source:MGI Symbol;Acc:MGI:1289257]
ENSMUSG00000022365	-0.837052	1.52153e-09	2.56159	1.70884	Derl1	protein_coding	Der1-like domain family, member 1 [Source:MGI Symbol;Acc:MGI:1915069]
ENSMUSG00000026618	-1.41117	1.52453e-09	4.4202	2.97733	Iars2	protein_coding	isoleucine-tRNA synthetase 2, mitochondrial [Source:MGI Symbol;Acc:MGI:1919586]
ENSMUSG00000031965	-1.18264	1.52785e-09	2.63332	1.4346	Tbx20	protein_coding	T-box 20 [Source:MGI Symbol;Acc:MGI:1888496]
ENSMUSG00000087260	-1.51424	1.53311e-09	4.1001	2.56136	Lamtor5	protein_coding	late endosomal/lysosomal adaptor, MAPK and MTOR activator 5 [Source:MGI Symbol;Acc:MGI:1915826]
ENSMUSG00000031358	-1.34667	1.53758e-09	3.98091	2.61055	Msl3	protein_coding	male-specific lethal 3 homolog (Drosophila) [Source:MGI Symbol;Acc:MGI:1341851]
ENSMUSG00000026176	-0.191107	1.5535e-09	2.48438	2.2797	Ctdsp1	protein_coding	CTD (carboxy-terminal domain, RNA polymerase II, polypeptide A) small phosphatase 1 [Source:MGI Symbol;Acc:MGI:2654470]
ENSMUSG00000024471	-1.288	1.5549e-09	4.98103	3.66028	Myot	protein_coding	myotilin [Source:MGI Symbol;Acc:MGI:1889800]
ENSMUSG00000037822	-1.11294	1.56163e-09	3.04167	1.90992	Smim14	protein_coding	small integral membrane protein 14 [Source:MGI Symbol;Acc:MGI:1915802]
ENSMUSG00000025862	-1.25505	1.57713e-09	1.95192	0.671785	Stag2	protein_coding	stromal antigen 2 [Source:MGI Symbol;Acc:MGI:1098583]
ENSMUSG00000058056	-1.71969	1.58231e-09	6.06942	4.29843	Palld	protein_coding	palladin, cytoskeletal associated protein [Source:MGI Symbol;Acc:MGI:1919583]
ENSMUSG00000027366	-1.12891	1.5845e-09	1.81339	0.669776	Sppl2a	protein_coding	signal peptide peptidase like 2A [Source:MGI Symbol;Acc:MGI:1913802]
ENSMUSG00000025026	-1.31411	1.5845e-09	2.5789	1.24428	Add3	protein_coding	adducin 3 (gamma) [Source:MGI Symbol;Acc:MGI:1351615]
ENSMUSG00000102422	-1.1961	1.58848e-09	3.78193	2.56387	Gm21949	protein_coding	predicted gene, 21949 [Source:MGI Symbol;Acc:MGI:5439400]
ENSMUSG00000073436	-0.792674	1.59708e-09	1.60349	0.796117	Eme2	protein_coding	essential meiotic structure-specific endonuclease subunit 2 [Source:MGI Symbol;Acc:MGI:1919889]
ENSMUSG00000046603	-0.885139	1.61311e-09	3.17954	2.2746	Tcaim	protein_coding	T cell activation inhibitor, mitochondrial [Source:MGI Symbol;Acc:MGI:1196217]
ENSMUSG00000024515	-0.615742	1.62026e-09	1.75751	1.12804	Smad4	protein_coding	SMAD family member 4 [Source:MGI Symbol;Acc:MGI:894293]
ENSMUSG00000021133	-0.747801	1.62026e-09	1.28507	0.522543	Susd6	protein_coding	sushi domain containing 6 [Source:MGI Symbol;Acc:MGI:2444661]
ENSMUSG00000040350	-0.695404	1.6217e-09	1.13756	0.429508	Trim7	protein_coding	tripartite motif-containing 7 [Source:MGI Symbol;Acc:MGI:2137353]
ENSMUSG00000037570	-0.846007	1.62473e-09	2.08674	1.22453	Mcrs1	protein_coding	microspherule protein 1 [Source:MGI Symbol;Acc:MGI:1858420]
ENSMUSG00000041241	-1.3138	1.63467e-09	3.12799	1.79638	Mul1	protein_coding	mitochondrial ubiquitin ligase activator of NFKB 1 [Source:MGI Symbol;Acc:MGI:1915600]
ENSMUSG00000090093	-0.834597	1.65062e-09	1.3002	0.443462	Gm14399	protein_coding	predicted gene 14399 [Source:MGI Symbol;Acc:MGI:3650082]
ENSMUSG00000051483	-0.424336	1.65992e-09	1.15399	0.716879	Cbr1	protein_coding	carbonyl reductase 1 [Source:MGI Symbol;Acc:MGI:88284]
ENSMUSG00000021906	-0.847152	1.65992e-09	2.56898	1.7057	Oxnad1	protein_coding	oxidoreductase NAD-binding domain containing 1 [Source:MGI Symbol;Acc:MGI:1916953]
ENSMUSG00000068580	-0.756127	1.6626e-09	0.782991	0.0115853	Zfyve19	protein_coding	zinc finger, FYVE domain containing 19 [Source:MGI Symbol;Acc:MGI:1919258]
ENSMUSG00000038005	-1.11153	1.66525e-09	2.2073	1.0758	Hpf1	protein_coding	histone PARylation factor 1 [Source:MGI Symbol;Acc:MGI:1919862]
ENSMUSG00000029669	-1.02052	1.66568e-09	2.45966	1.42178	Tspan12	protein_coding	tetraspanin 12 [Source:MGI Symbol;Acc:MGI:1889818]
ENSMUSG00000027881	-0.627199	1.67274e-09	1.17072	0.529228	Prpf38b	protein_coding	PRP38 pre-mRNA processing factor 38 (yeast) domain containing B [Source:MGI Symbol;Acc:MGI:1914171]
ENSMUSG00000020088	-0.911952	1.67274e-09	4.78284	3.81927	Sar1a	protein_coding	secretion associated Ras related GTPase 1A [Source:MGI Symbol;Acc:MGI:98230]
ENSMUSG00000021488	-1.32687	1.67278e-09	2.74094	1.39619	Nsd1	protein_coding	nuclear receptor-binding SET-domain protein 1 [Source:MGI Symbol;Acc:MGI:1276545]
ENSMUSG00000006273	-0.454713	1.67529e-09	1.07316	0.605054	Atp6v1b2	protein_coding	ATPase, H+ transporting, lysosomal V1 subunit B2 [Source:MGI Symbol;Acc:MGI:109618]
ENSMUSG00000107478	-1.23943	1.68004e-09	5.46874	4.17185	Gm45234	protein_coding	predicted gene 45234 [Source:MGI Symbol;Acc:MGI:5753810]
ENSMUSG00000041957	-1.56011	1.68004e-09	4.69334	3.10072	Pkp2	protein_coding	plakophilin 2 [Source:MGI Symbol;Acc:MGI:1914701]
ENSMUSG00000047714	-1.52434	1.68259e-09	4.08644	2.53765	Ppp1r2	protein_coding	protein phosphatase 1, regulatory (inhibitor) subunit 2 [Source:MGI Symbol;Acc:MGI:1914099]
ENSMUSG00000018848	-0.667254	1.69918e-09	2.21164	1.5299	Rars	protein_coding	arginyl-tRNA synthetase [Source:MGI Symbol;Acc:MGI:1914297]
ENSMUSG00000028517	-0.821446	1.69975e-09	1.3089	0.471329	Plpp3	protein_coding	phospholipid phosphatase 3 [Source:MGI Symbol;Acc:MGI:1915166]
ENSMUSG00000008604	-1.09741	1.70675e-09	2.45448	1.34256	Ubqln4	protein_coding	ubiquilin 4 [Source:MGI Symbol;Acc:MGI:2150152]
ENSMUSG00000028890	-1.17639	1.70675e-09	2.31936	1.12572	Mtf1	protein_coding	metal response element binding transcription factor 1 [Source:MGI Symbol;Acc:MGI:101786]
ENSMUSG00000022964	-0.707466	1.71539e-09	2.39765	1.67544	Tmem50b	protein_coding	transmembrane protein 50B [Source:MGI Symbol;Acc:MGI:1925225]
ENSMUSG00000027677	-1.12052	1.71553e-09	1.53496	0.386606	Ttc14	protein_coding	tetratricopeptide repeat domain 14 [Source:MGI Symbol;Acc:MGI:1914370]
ENSMUSG00000028737	-0.922977	1.7174e-09	3.12214	2.1795	Aldh4a1	protein_coding	aldehyde dehydrogenase 4 family, member A1 [Source:MGI Symbol;Acc:MGI:2443883]
ENSMUSG00000031065	-0.530651	1.72672e-09	1.38491	0.842595	Cdk16	protein_coding	cyclin-dependent kinase 16 [Source:MGI Symbol;Acc:MGI:97516]
ENSMUSG00000033174	-1.37992	1.72672e-09	2.38752	0.986387	Mgll	protein_coding	monoglyceride lipase [Source:MGI Symbol;Acc:MGI:1346042]
ENSMUSG00000027942	-1.38332	1.72672e-09	3.49077	2.08682	4933434E20Rik	protein_coding	RIKEN cDNA 4933434E20 gene [Source:MGI Symbol;Acc:MGI:1914027]
ENSMUSG00000063406	-1.12664	1.73561e-09	2.47384	1.329	Tmed5	protein_coding	transmembrane p24 trafficking protein 5 [Source:MGI Symbol;Acc:MGI:1921586]
ENSMUSG00000027787	-0.450691	1.73569e-09	0.995148	0.528222	Nmd3	protein_coding	NMD3 ribosome export adaptor [Source:MGI Symbol;Acc:MGI:2140103]
ENSMUSG00000026987	-0.790047	1.74581e-09	1.7656	0.958003	Baz2b	protein_coding	bromodomain adjacent to zinc finger domain, 2B [Source:MGI Symbol;Acc:MGI:2442782]
ENSMUSG00000036299	-0.765863	1.74774e-09	1.73877	0.959888	BC031181	protein_coding	cDNA sequence BC031181 [Source:MGI Symbol;Acc:MGI:3039614]
ENSMUSG00000040521	-0.976586	1.74885e-09	2.49671	1.50449	Tsfm	protein_coding	Ts translation elongation factor, mitochondrial [Source:MGI Symbol;Acc:MGI:1913649]
ENSMUSG00000002797	-0.742653	1.7509e-09	1.86003	1.10378	Ggct	protein_coding	gamma-glutamyl cyclotransferase [Source:MGI Symbol;Acc:MGI:95700]
ENSMUSG00000021039	-0.794113	1.76448e-09	3.01628	2.20439	Snw1	protein_coding	SNW domain containing 1 [Source:MGI Symbol;Acc:MGI:1913604]
ENSMUSG00000014905	-0.648194	1.76665e-09	1.97906	1.31728	Dnajb9	protein_coding	DnaJ heat shock protein family (Hsp40) member B9 [Source:MGI Symbol;Acc:MGI:1351618]
ENSMUSG00000027712	-1.12647	1.77893e-09	1.90933	0.770438	Anxa5	protein_coding	annexin A5 [Source:MGI Symbol;Acc:MGI:106008]
ENSMUSG00000042608	-0.781523	1.78843e-09	2.67467	1.87656	Stk40	protein_coding	serine/threonine kinase 40 [Source:MGI Symbol;Acc:MGI:1921428]
ENSMUSG00000028522	-1.22556	1.79567e-09	2.3818	1.13476	Mier1	protein_coding	MEIR1 treanscription regulator [Source:MGI Symbol;Acc:MGI:1918398]
ENSMUSG00000079108	-1.5207	1.79567e-09	5.97821	4.40473	Srp54b	protein_coding	signal recognition particle 54B [Source:MGI Symbol;Acc:MGI:3714357]
ENSMUSG00000020775	-0.522821	1.84177e-09	1.95473	1.41933	Mrpl38	protein_coding	mitochondrial ribosomal protein L38 [Source:MGI Symbol;Acc:MGI:1926269]
ENSMUSG00000032480	-1.28724	1.84827e-09	2.06804	0.756909	Dhx30	protein_coding	DEAH (Asp-Glu-Ala-His) box polypeptide 30 [Source:MGI Symbol;Acc:MGI:1920081]
ENSMUSG00000021131	-0.682278	1.8499e-09	1.97088	1.27587	Erh	protein_coding	enhancer of rudimentary homolog (Drosophila) [Source:MGI Symbol;Acc:MGI:108089]
ENSMUSG00000004044	-0.299236	1.85601e-09	2.27935	1.96713	Cavin1	protein_coding	caveolae associated 1 [Source:MGI Symbol;Acc:MGI:1277968]
ENSMUSG00000031865	-1.79472	1.86087e-09	4.98604	3.1616	Dctn1	protein_coding	dynactin 1 [Source:MGI Symbol;Acc:MGI:107745]
ENSMUSG00000038235	-0.232964	1.86614e-09	0.964309	0.721502	F11r	protein_coding	F11 receptor [Source:MGI Symbol;Acc:MGI:1321398]
ENSMUSG00000047264	-0.641755	1.87364e-09	1.21954	0.563001	Zfp358	protein_coding	zinc finger protein 358 [Source:MGI Symbol;Acc:MGI:2153740]
ENSMUSG00000033096	-0.914834	1.87424e-09	1.56166	0.633538	Apmap	protein_coding	adipocyte plasma membrane associated protein [Source:MGI Symbol;Acc:MGI:1919131]
ENSMUSG00000013858	-0.788536	1.87664e-09	2.06005	1.25898	Tmem259	protein_coding	transmembrane protein 259 [Source:MGI Symbol;Acc:MGI:2177957]
ENSMUSG00000039652	-1.45932	1.88389e-09	3.90849	2.42616	Cpeb3	protein_coding	cytoplasmic polyadenylation element binding protein 3 [Source:MGI Symbol;Acc:MGI:2443075]
ENSMUSG00000028743	-0.9137	1.88654e-09	2.77835	1.84827	Akr7a5	protein_coding	aldo-keto reductase family 7, member A5 (aflatoxin aldehyde reductase) [Source:MGI Symbol;Acc:MGI:107796]
ENSMUSG00000031029	-1.45497	1.89175e-09	4.76689	3.276	Eif3f	protein_coding	eukaryotic translation initiation factor 3, subunit F [Source:MGI Symbol;Acc:MGI:1913335]
ENSMUSG00000009545	-0.917033	1.90365e-09	1.93389	1.00454	Kcnq1	protein_coding	potassium voltage-gated channel, subfamily Q, member 1 [Source:MGI Symbol;Acc:MGI:108083]
ENSMUSG00000033182	-0.801799	1.91444e-09	1.14869	0.333357	Kbtbd12	protein_coding	kelch repeat and BTB (POZ) domain containing 12 [Source:MGI Symbol;Acc:MGI:1918481]
ENSMUSG00000078572	-1.40941	1.92032e-09	4.39465	2.95768	Ndufaf8	protein_coding	NADH dehydrogenase (ubiquinone) 1 alpha subcomplex assembly factor 8 [Source:MGI Symbol;Acc:MGI:1913676]
ENSMUSG00000029152	-2.02263	1.92088e-09	4.82274	2.77512	Ociad1	protein_coding	OCIA domain containing 1 [Source:MGI Symbol;Acc:MGI:1915345]
ENSMUSG00000027304	-0.906188	1.92407e-09	2.40474	1.48312	Rtf1	protein_coding	RTF1, Paf1/RNA polymerase II complex component [Source:MGI Symbol;Acc:MGI:1309480]
ENSMUSG00000020708	-0.562963	1.93243e-09	2.81729	2.23738	Psmc5	protein_coding	protease (prosome, macropain) 26S subunit, ATPase 5 [Source:MGI Symbol;Acc:MGI:105047]
ENSMUSG00000000738	-1.68573	1.94191e-09	5.35626	3.63346	Spg7	protein_coding	SPG7, paraplegin matrix AAA peptidase subunit [Source:MGI Symbol;Acc:MGI:2385906]
ENSMUSG00000001942	-1.04893	1.98835e-09	1.73961	0.674957	Siae	protein_coding	sialic acid acetylesterase [Source:MGI Symbol;Acc:MGI:104803]
ENSMUSG00000041733	-1.24316	1.99446e-09	3.83616	2.56902	Coq5	protein_coding	coenzyme Q5 methyltransferase [Source:MGI Symbol;Acc:MGI:1098643]
ENSMUSG00000034354	-0.658727	1.99888e-09	2.48437	1.80886	Mtmr3	protein_coding	myotubularin related protein 3 [Source:MGI Symbol;Acc:MGI:1921552]
ENSMUSG00000041891	-1.13573	2.00848e-09	2.74234	1.58898	Lman1	protein_coding	lectin, mannose-binding, 1 [Source:MGI Symbol;Acc:MGI:1917611]
ENSMUSG00000071655	-1.33504	2.01155e-09	5.77252	4.38559	Ubxn1	protein_coding	UBX domain protein 1 [Source:MGI Symbol;Acc:MGI:1289301]
ENSMUSG00000023026	-0.462053	2.01906e-09	1.24703	0.770259	Dip2b	protein_coding	disco interacting protein 2 homolog B [Source:MGI Symbol;Acc:MGI:2145977]
ENSMUSG00000021022	-0.664588	2.02399e-09	2.47754	1.79795	Ppp2r3c	protein_coding	protein phosphatase 2, regulatory subunit B'', gamma [Source:MGI Symbol;Acc:MGI:1930009]
ENSMUSG00000038155	-1.26649	2.02737e-09	5.3443	4.02998	Gstp2	protein_coding	glutathione S-transferase, pi 2 [Source:MGI Symbol;Acc:MGI:95864]
ENSMUSG00000025133	-0.744415	2.05152e-09	1.5435	0.785642	Ints4	protein_coding	integrator complex subunit 4 [Source:MGI Symbol;Acc:MGI:1917164]
ENSMUSG00000026628	-0.936925	2.05721e-09	3.7414	2.78252	Atf3	protein_coding	activating transcription factor 3 [Source:MGI Symbol;Acc:MGI:109384]
ENSMUSG00000009549	-0.999455	2.05721e-09	4.11478	3.08513	Srp14	protein_coding	signal recognition particle 14 [Source:MGI Symbol;Acc:MGI:107169]
ENSMUSG00000023927	-1.39913	2.05721e-09	2.78667	1.36804	Satb1	protein_coding	special AT-rich sequence binding protein 1 [Source:MGI Symbol;Acc:MGI:105084]
ENSMUSG00000028106	-0.676908	2.0629e-09	1.44364	0.754103	Rprd2	protein_coding	regulation of nuclear pre-mRNA domain containing 2 [Source:MGI Symbol;Acc:MGI:1922387]
ENSMUSG00000096740	-0.7137	2.07e-09	2.43963	1.71082	Lbhd1	protein_coding	LBH domain containing 1 [Source:MGI Symbol;Acc:MGI:5516029]
ENSMUSG00000021716	-0.783337	2.07e-09	2.12446	1.3269	Srek1ip1	protein_coding	splicing regulatory glutamine/lysine-rich protein 1interacting protein 1 [Source:MGI Symbol;Acc:MGI:1914538]
ENSMUSG00000052419	-0.822809	2.07293e-09	2.50873	1.6683	2610001J05Rik	protein_coding	RIKEN cDNA 2610001J05 gene [Source:MGI Symbol;Acc:MGI:1913770]
ENSMUSG00000004264	-1.59	2.07403e-09	4.70565	3.08522	Phb2	protein_coding	prohibitin 2 [Source:MGI Symbol;Acc:MGI:102520]
ENSMUSG00000005846	-1.03809	2.07761e-09	3.53165	2.47219	Rsl1d1	protein_coding	ribosomal L1 domain containing 1 [Source:MGI Symbol;Acc:MGI:1913659]
ENSMUSG00000021982	-1.4135	2.07761e-09	2.86946	1.43744	Cdadc1	protein_coding	cytidine and dCMP deaminase domain containing 1 [Source:MGI Symbol;Acc:MGI:1919141]
ENSMUSG00000021814	-2.02583	2.07761e-09	3.72341	1.67764	Anxa7	protein_coding	annexin A7 [Source:MGI Symbol;Acc:MGI:88031]
ENSMUSG00000037958	-0.86806	2.08002e-09	1.76682	0.88356	Nsrp1	protein_coding	nuclear speckle regulatory protein 1 [Source:MGI Symbol;Acc:MGI:2144305]
ENSMUSG00000002107	-2.57227	2.08074e-09	5.38346	2.78278	Celf2	protein_coding	CUGBP, Elav-like family member 2 [Source:MGI Symbol;Acc:MGI:1338822]
ENSMUSG00000020994	-1.00619	2.08352e-09	2.18509	1.16292	Pnn	protein_coding	pinin [Source:MGI Symbol;Acc:MGI:1100514]
ENSMUSG00000020375	-0.301055	2.08553e-09	1.61653	1.30334	Rufy1	protein_coding	RUN and FYVE domain containing 1 [Source:MGI Symbol;Acc:MGI:2429762]
ENSMUSG00000046110	-1.0999	2.09843e-09	1.79927	0.682534	Serinc4	protein_coding	serine incorporator 4 [Source:MGI Symbol;Acc:MGI:2441842]
ENSMUSG00000027714	-0.970664	2.11336e-09	1.90975	0.923875	Exosc9	protein_coding	exosome component 9 [Source:MGI Symbol;Acc:MGI:1355319]
ENSMUSG00000059208	-1.87579	2.11501e-09	4.01045	2.11147	Hnrnpm	protein_coding	heterogeneous nuclear ribonucleoprotein M [Source:MGI Symbol;Acc:MGI:1926465]
ENSMUSG00000024431	-2.21894	2.11639e-09	4.84985	2.60515	Nr3c1	protein_coding	nuclear receptor subfamily 3, group C, member 1 [Source:MGI Symbol;Acc:MGI:95824]
ENSMUSG00000029911	-1.82102	2.11699e-09	5.3875	3.53321	Ssbp1	protein_coding	single-stranded DNA binding protein 1 [Source:MGI Symbol;Acc:MGI:1920040]
ENSMUSG00000004455	-1.6465	2.13224e-09	4.22985	2.55903	Ppp1cc	protein_coding	protein phosphatase 1, catalytic subunit, gamma isoform [Source:MGI Symbol;Acc:MGI:104872]
ENSMUSG00000005615	-1.43932	2.14607e-09	4.96414	3.49062	Pcyt1a	protein_coding	phosphate cytidylyltransferase 1, choline, alpha isoform [Source:MGI Symbol;Acc:MGI:88557]
ENSMUSG00000032504	-1.49978	2.14626e-09	2.85516	1.33878	Pdcd6ip	protein_coding	programmed cell death 6 interacting protein [Source:MGI Symbol;Acc:MGI:1333753]
ENSMUSG00000007880	-1.16725	2.15007e-09	1.74015	0.55541	Arid1a	protein_coding	AT rich interactive domain 1A (SWI-like) [Source:MGI Symbol;Acc:MGI:1935147]
ENSMUSG00000071074	-0.694569	2.15281e-09	1.79163	1.08399	Yipf3	protein_coding	Yip1 domain family, member 3 [Source:MGI Symbol;Acc:MGI:106280]
ENSMUSG00000026269	-1.04973	2.15306e-09	3.01534	1.9478	Rnpepl1	protein_coding	arginyl aminopeptidase (aminopeptidase B)-like 1 [Source:MGI Symbol;Acc:MGI:1914170]
ENSMUSG00000025169	-0.653609	2.15601e-09	1.06752	0.402059	Ogfod3	protein_coding	2-oxoglutarate and iron-dependent oxygenase domain containing 3 [Source:MGI Symbol;Acc:MGI:1913429]
ENSMUSG00000029128	-2.11358	2.1581e-09	5.06816	2.9275	Rab28	protein_coding	RAB28, member RAS oncogene family [Source:MGI Symbol;Acc:MGI:1917285]
ENSMUSG00000067608	-0.472261	2.16605e-09	1.03535	0.54953	Pcna-ps2	protein_coding	proliferating cell nuclear antigen pseudogene 2 [Source:MGI Symbol;Acc:MGI:97505]
ENSMUSG00000041164	-1.45949	2.18038e-09	2.26347	0.785573	Zmiz2	protein_coding	zinc finger, MIZ-type containing 2 [Source:MGI Symbol;Acc:MGI:106374]
ENSMUSG00000015290	-0.943988	2.18172e-09	3.1535	2.19064	Ubl4a	protein_coding	ubiquitin-like 4A [Source:MGI Symbol;Acc:MGI:95049]
ENSMUSG00000021756	-1.87638	2.1845e-09	4.6127	2.71074	Il6st	protein_coding	interleukin 6 signal transducer [Source:MGI Symbol;Acc:MGI:96560]
ENSMUSG00000003518	-1.79042	2.19419e-09	4.28773	2.47215	Dusp3	protein_coding	dual specificity phosphatase 3 (vaccinia virus phosphatase VH1-related) [Source:MGI Symbol;Acc:MGI:1919599]
ENSMUSG00000037095	-0.546731	2.20127e-09	1.89674	1.33718	Lrg1	protein_coding	leucine-rich alpha-2-glycoprotein 1 [Source:MGI Symbol;Acc:MGI:1924155]
ENSMUSG00000028675	-1.25545	2.20127e-09	2.34263	1.07095	Pnrc2	protein_coding	proline-rich nuclear receptor coactivator 2 [Source:MGI Symbol;Acc:MGI:106512]
ENSMUSG00000000439	-1.37732	2.20127e-09	3.86588	2.46587	Mkrn2	protein_coding	makorin, ring finger protein, 2 [Source:MGI Symbol;Acc:MGI:1914277]
ENSMUSG00000041037	-0.83166	2.21111e-09	1.19794	0.353117	Irgq	protein_coding	immunity-related GTPase family, Q [Source:MGI Symbol;Acc:MGI:2667176]
ENSMUSG00000022710	-0.658702	2.23336e-09	2.22816	1.5543	Usp7	protein_coding	ubiquitin specific peptidase 7 [Source:MGI Symbol;Acc:MGI:2182061]
ENSMUSG00000074227	-0.67994	2.23336e-09	1.36611	0.671773	Spint2	protein_coding	serine protease inhibitor, Kunitz type 2 [Source:MGI Symbol;Acc:MGI:1338031]
ENSMUSG00000002661	-1.68444	2.23838e-09	4.50382	2.79311	Alkbh7	protein_coding	alkB homolog 7 [Source:MGI Symbol;Acc:MGI:1913650]
ENSMUSG00000007670	-0.447555	2.2408e-09	0.644804	0.187276	Khsrp	protein_coding	KH-type splicing regulatory protein [Source:MGI Symbol;Acc:MGI:1336214]
ENSMUSG00000005575	-0.451468	2.24234e-09	2.17317	1.70953	Ube2m	protein_coding	ubiquitin-conjugating enzyme E2M [Source:MGI Symbol;Acc:MGI:108278]
ENSMUSG00000025609	-1.17898	2.25922e-09	2.24759	1.05427	Mkln1	protein_coding	muskelin 1, intracellular mediator containing kelch motifs [Source:MGI Symbol;Acc:MGI:1351638]
ENSMUSG00000002396	-1.1423	2.27882e-09	2.61344	1.45597	Ocel1	protein_coding	occludin/ELL domain containing 1 [Source:MGI Symbol;Acc:MGI:1924340]
ENSMUSG00000062937	-0.184247	2.28438e-09	1.24487	1.04991	Mtap	protein_coding	methylthioadenosine phosphorylase [Source:MGI Symbol;Acc:MGI:1914152]
ENSMUSG00000068566	-1.32361	2.28438e-09	2.15106	0.811227	Myadm	protein_coding	myeloid-associated differentiation marker [Source:MGI Symbol;Acc:MGI:1355332]
ENSMUSG00000018932	-0.763526	2.28529e-09	1.65004	0.872469	Map2k3	protein_coding	mitogen-activated protein kinase kinase 3 [Source:MGI Symbol;Acc:MGI:1346868]
ENSMUSG00000021371	-1.31147	2.28529e-09	3.90654	2.57035	Mcur1	protein_coding	mitochondrial calcium uniporter regulator 1 [Source:MGI Symbol;Acc:MGI:1923387]
ENSMUSG00000037894	-1.50877	2.28529e-09	4.02135	2.48914	H2afz	protein_coding	H2A histone family, member Z [Source:MGI Symbol;Acc:MGI:1888388]
ENSMUSG00000021024	-1.46875	2.29129e-09	5.28652	3.77289	Psma6	protein_coding	proteasome (prosome, macropain) subunit, alpha type 6 [Source:MGI Symbol;Acc:MGI:1347006]
ENSMUSG00000041084	-1.14067	2.29781e-09	1.85528	0.700612	Ostc	protein_coding	oligosaccharyltransferase complex subunit (non-catalytic) [Source:MGI Symbol;Acc:MGI:1913607]
ENSMUSG00000031984	-1.09275	2.30163e-09	4.26816	3.14442	2810004N23Rik	protein_coding	RIKEN cDNA 2810004N23 gene [Source:MGI Symbol;Acc:MGI:1913773]
ENSMUSG00000057522	-1.50386	2.30163e-09	5.47907	3.93192	Spop	protein_coding	speckle-type POZ protein [Source:MGI Symbol;Acc:MGI:1343085]
ENSMUSG00000001383	-0.536722	2.30728e-09	2.45587	1.90454	Zmat2	protein_coding	zinc finger, matrin type 2 [Source:MGI Symbol;Acc:MGI:1913742]
ENSMUSG00000001105	-1.46956	2.31673e-09	2.56674	1.08061	Ift20	protein_coding	intraflagellar transport 20 [Source:MGI Symbol;Acc:MGI:1915585]
ENSMUSG00000022781	-1.08145	2.32245e-09	1.78138	0.685834	Pak2	protein_coding	p21 protein (Cdc42/Rac)-activated kinase 2 [Source:MGI Symbol;Acc:MGI:1339984]
ENSMUSG00000029512	-0.455767	2.32718e-09	1.49171	1.02411	Ulk1	protein_coding	unc-51 like kinase 1 [Source:MGI Symbol;Acc:MGI:1270126]
ENSMUSG00000078875	-0.625875	2.33247e-09	1.25308	0.612405	Gm14419	protein_coding	predicted gene 14419 [Source:MGI Symbol;Acc:MGI:3702410]
ENSMUSG00000009076	-0.454649	2.35811e-09	1.39163	0.924836	Zmat5	protein_coding	zinc finger, matrin type 5 [Source:MGI Symbol;Acc:MGI:1914428]
ENSMUSG00000038502	-0.817499	2.36377e-09	2.83785	2.0037	Ptov1	protein_coding	prostate tumor over expressed gene 1 [Source:MGI Symbol;Acc:MGI:1933946]
ENSMUSG00000010517	-1.27151	2.36893e-09	3.45267	2.1611	Faf1	protein_coding	Fas-associated factor 1 [Source:MGI Symbol;Acc:MGI:109419]
ENSMUSG00000020176	-1.29283	2.37317e-09	3.01188	1.70094	Grb10	protein_coding	growth factor receptor bound protein 10 [Source:MGI Symbol;Acc:MGI:103232]
ENSMUSG00000025466	-1.25047	2.37539e-09	3.49158	2.2207	Fuom	protein_coding	fucose mutarotase [Source:MGI Symbol;Acc:MGI:1916314]
ENSMUSG00000070803	-0.567912	2.40368e-09	1.60399	1.02414	Cited4	protein_coding	Cbp/p300-interacting transactivator, with Glu/Asp-rich carboxy-terminal domain, 4 [Source:MGI Symbol;Acc:MGI:1861694]
ENSMUSG00000039496	-0.670261	2.4238e-09	1.18216	0.498877	Cdnf	protein_coding	cerebral dopamine neurotrophic factor [Source:MGI Symbol;Acc:MGI:3606576]
ENSMUSG00000043122	-0.684316	2.44241e-09	1.05366	0.355854	A530016L24Rik	protein_coding	RIKEN cDNA A530016L24 gene [Source:MGI Symbol;Acc:MGI:2443020]
ENSMUSG00000017754	-0.715617	2.44444e-09	1.21191	0.481094	Pltp	protein_coding	phospholipid transfer protein [Source:MGI Symbol;Acc:MGI:103151]
ENSMUSG00000078695	-2.15076	2.44578e-09	5.00962	2.83388	Cisd3	protein_coding	CDGSH iron sulfur domain 3 [Source:MGI Symbol;Acc:MGI:101788]
ENSMUSG00000038762	-1.0351	2.45043e-09	4.32141	3.25326	Abcf1	protein_coding	ATP-binding cassette, sub-family F (GCN20), member 1 [Source:MGI Symbol;Acc:MGI:1351658]
ENSMUSG00000022562	-1.09064	2.45174e-09	2.19256	1.08408	Oplah	protein_coding	5-oxoprolinase (ATP-hydrolysing) [Source:MGI Symbol;Acc:MGI:1922725]
ENSMUSG00000038127	-0.159099	2.46247e-09	0.929057	0.756696	Ccdc50	protein_coding	coiled-coil domain containing 50 [Source:MGI Symbol;Acc:MGI:1914751]
ENSMUSG00000041124	-1.23171	2.46247e-09	3.58179	2.32903	Msantd4	protein_coding	Myb/SANT-like DNA-binding domain containing 4 with coiled-coils [Source:MGI Symbol;Acc:MGI:1925350]
ENSMUSG00000027637	-1.11129	2.47268e-09	2.84828	1.72039	1110008F13Rik	protein_coding	RIKEN cDNA 1110008F13 gene [Source:MGI Symbol;Acc:MGI:1914638]
ENSMUSG00000045973	-1.43839	2.50896e-09	3.02422	1.56792	Slc25a51	protein_coding	solute carrier family 25, member 51 [Source:MGI Symbol;Acc:MGI:2684984]
ENSMUSG00000045427	-1.60555	2.50995e-09	3.60247	1.97619	Hnrnph2	protein_coding	heterogeneous nuclear ribonucleoprotein H2 [Source:MGI Symbol;Acc:MGI:1201779]
ENSMUSG00000049090	-0.784214	2.52178e-09	2.74529	1.94468	Zadh2	protein_coding	zinc binding alcohol dehydrogenase, domain containing 2 [Source:MGI Symbol;Acc:MGI:2444835]
ENSMUSG00000096199	-0.422969	2.53541e-09	2.91772	2.47713	Ptrhd1	protein_coding	peptidyl-tRNA hydrolase domain containing 1 [Source:MGI Symbol;Acc:MGI:1916959]
ENSMUSG00000003234	-1.07638	2.53541e-09	2.47463	1.38347	Abcf3	protein_coding	ATP-binding cassette, sub-family F (GCN20), member 3 [Source:MGI Symbol;Acc:MGI:1351656]
ENSMUSG00000015579	-0.679328	2.58761e-09	2.1328	1.44091	Nkx2-5	protein_coding	NK2 homeobox 5 [Source:MGI Symbol;Acc:MGI:97350]
ENSMUSG00000018196	-1.39405	2.58761e-09	4.18709	2.76858	Glrx2	protein_coding	glutaredoxin 2 (thioltransferase) [Source:MGI Symbol;Acc:MGI:1916617]
ENSMUSG00000004347	-1.65547	2.58761e-09	3.39587	1.71962	Pde1c	protein_coding	phosphodiesterase 1C [Source:MGI Symbol;Acc:MGI:108413]
ENSMUSG00000017057	-0.820778	2.59244e-09	1.85848	1.02347	Il13ra1	protein_coding	interleukin 13 receptor, alpha 1 [Source:MGI Symbol;Acc:MGI:105052]
ENSMUSG00000041731	-0.99203	2.5965e-09	3.20843	2.19739	Pgm5	protein_coding	phosphoglucomutase 5 [Source:MGI Symbol;Acc:MGI:1925668]
ENSMUSG00000078429	-0.869437	2.59762e-09	2.76084	1.87448	Ctdsp2	protein_coding	CTD (carboxy-terminal domain, RNA polymerase II, polypeptide A) small phosphatase 2 [Source:MGI Symbol;Acc:MGI:1098748]
ENSMUSG00000040653	-1.57512	2.60695e-09	5.38742	3.77128	Ppp1r14c	protein_coding	protein phosphatase 1, regulatory (inhibitor) subunit 14c [Source:MGI Symbol;Acc:MGI:1923392]
ENSMUSG00000026944	-0.660233	2.61527e-09	0.914452	0.242115	Abca2	protein_coding	ATP-binding cassette, sub-family A (ABC1), member 2 [Source:MGI Symbol;Acc:MGI:99606]
ENSMUSG00000026279	-1.29512	2.62514e-09	3.32628	2.01155	Thap4	protein_coding	THAP domain containing 4 [Source:MGI Symbol;Acc:MGI:1914276]
ENSMUSG00000002768	-0.722978	2.65262e-09	2.37004	1.63292	Mea1	protein_coding	male enhanced antigen 1 [Source:MGI Symbol;Acc:MGI:96957]
ENSMUSG00000020621	-0.940825	2.6533e-09	3.37881	2.418	Rdh14	protein_coding	retinol dehydrogenase 14 (all-trans and 9-cis) [Source:MGI Symbol;Acc:MGI:1920402]
ENSMUSG00000034981	-1.08008	2.67305e-09	3.50278	2.40143	Parm1	protein_coding	prostate androgen-regulated mucin-like protein 1 [Source:MGI Symbol;Acc:MGI:2443349]
ENSMUSG00000036620	-0.784475	2.69274e-09	1.43397	0.63734	Mgat4b	protein_coding	mannoside acetylglucosaminyltransferase 4, isoenzyme B [Source:MGI Symbol;Acc:MGI:2143974]
ENSMUSG00000044155	-0.990313	2.69513e-09	1.5993	0.594217	Lsm8	protein_coding	LSM8 homolog, U6 small nuclear RNA associated [Source:MGI Symbol;Acc:MGI:1923772]
ENSMUSG00000056612	-0.831187	2.70889e-09	2.41428	1.56854	Ppp1r14b	protein_coding	protein phosphatase 1, regulatory (inhibitor) subunit 14B [Source:MGI Symbol;Acc:MGI:107682]
ENSMUSG00000036564	-2.13811	2.71202e-09	5.81465	3.64174	Ndrg4	protein_coding	N-myc downstream regulated gene 4 [Source:MGI Symbol;Acc:MGI:2384590]
ENSMUSG00000029156	-1.18743	2.71741e-09	4.33202	3.11359	Sgcb	protein_coding	sarcoglycan, beta (dystrophin-associated glycoprotein) [Source:MGI Symbol;Acc:MGI:1346523]
ENSMUSG00000058174	-1.58798	2.71759e-09	5.59392	3.97281	Gm5148	protein_coding	predicted gene 5148 [Source:MGI Symbol;Acc:MGI:3646006]
ENSMUSG00000021009	-0.977345	2.72319e-09	1.88806	0.890264	Ptpn21	protein_coding	protein tyrosine phosphatase, non-receptor type 21 [Source:MGI Symbol;Acc:MGI:1344406]
ENSMUSG00000038417	-0.74359	2.72762e-09	1.69275	0.935819	Fig4	protein_coding	FIG4 phosphoinositide 5-phosphatase [Source:MGI Symbol;Acc:MGI:2143585]
ENSMUSG00000021583	-1.4433	2.72835e-09	2.55846	1.10125	Erap1	protein_coding	endoplasmic reticulum aminopeptidase 1 [Source:MGI Symbol;Acc:MGI:1933403]
ENSMUSG00000078154	-1.04297	2.73607e-09	3.76028	2.69047	Gm12184	protein_coding	predicted gene 12184 [Source:MGI Symbol;Acc:MGI:3652174]
ENSMUSG00000020594	-1.59672	2.74506e-09	4.20775	2.58675	Pum2	protein_coding	pumilio RNA-binding family member 2 [Source:MGI Symbol;Acc:MGI:1931751]
ENSMUSG00000028309	-1.05469	2.75487e-09	2.99994	1.92675	Rnf20	protein_coding	ring finger protein 20 [Source:MGI Symbol;Acc:MGI:1925927]
ENSMUSG00000007836	-1.12727	2.75487e-09	2.73253	1.58954	Hnrnpa0	protein_coding	heterogeneous nuclear ribonucleoprotein A0 [Source:MGI Symbol;Acc:MGI:1924384]
ENSMUSG00000044345	-0.228546	2.75591e-09	0.474986	0.233348	Marveld1	protein_coding	MARVEL (membrane-associating) domain containing 1 [Source:MGI Symbol;Acc:MGI:2147570]
ENSMUSG00000022507	-0.7287	2.7601e-09	1.27084	0.525412	1810013L24Rik	protein_coding	RIKEN cDNA 1810013L24 gene [Source:MGI Symbol;Acc:MGI:1916303]
ENSMUSG00000027710	-0.898984	2.7601e-09	1.86339	0.949442	Acad9	protein_coding	acyl-Coenzyme A dehydrogenase family, member 9 [Source:MGI Symbol;Acc:MGI:1914272]
ENSMUSG00000036503	-1.66147	2.76517e-09	4.14812	2.46331	Rnf13	protein_coding	ring finger protein 13 [Source:MGI Symbol;Acc:MGI:1346341]
ENSMUSG00000068328	-0.279301	2.76574e-09	1.27687	0.98732	Aup1	protein_coding	ancient ubiquitous protein 1 [Source:MGI Symbol;Acc:MGI:107789]
ENSMUSG00000040423	-0.867704	2.78249e-09	1.61159	0.728313	Rc3h1	protein_coding	RING CCCH (C3H) domains 1 [Source:MGI Symbol;Acc:MGI:2685397]
ENSMUSG00000041216	-1.54916	2.78563e-09	2.77141	1.20366	Clvs1	protein_coding	clavesin 1 [Source:MGI Symbol;Acc:MGI:1921688]
ENSMUSG00000027961	-1.15597	2.7945e-09	4.77667	3.58199	Lrrc39	protein_coding	leucine rich repeat containing 39 [Source:MGI Symbol;Acc:MGI:1924557]
ENSMUSG00000034157	-0.922928	2.80396e-09	1.90446	0.966942	Cipc	protein_coding	CLOCK interacting protein, circadian [Source:MGI Symbol;Acc:MGI:1919185]
ENSMUSG00000005312	-1.48155	2.8044e-09	3.45695	1.95563	Ubqln1	protein_coding	ubiquilin 1 [Source:MGI Symbol;Acc:MGI:1860276]
ENSMUSG00000047412	-1.10139	2.80837e-09	2.00608	0.888349	Zbtb44	protein_coding	zinc finger and BTB domain containing 44 [Source:MGI Symbol;Acc:MGI:1925123]
ENSMUSG00000048578	-0.801595	2.8134e-09	1.92806	1.11408	Mlec	protein_coding	malectin [Source:MGI Symbol;Acc:MGI:1924015]
ENSMUSG00000006219	-1.88535	2.81951e-09	5.91719	3.99134	Fblim1	protein_coding	filamin binding LIM protein 1 [Source:MGI Symbol;Acc:MGI:1921452]
ENSMUSG00000022043	-0.577584	2.82007e-09	2.22993	1.63851	Trim35	protein_coding	tripartite motif-containing 35 [Source:MGI Symbol;Acc:MGI:1914104]
ENSMUSG00000024758	-1.62273	2.82547e-09	3.02921	1.3886	Rtn3	protein_coding	reticulon 3 [Source:MGI Symbol;Acc:MGI:1339970]
ENSMUSG00000022811	-0.895397	2.82941e-09	2.22561	1.31353	Zfp148	protein_coding	zinc finger protein 148 [Source:MGI Symbol;Acc:MGI:1332234]
ENSMUSG00000041459	-2.17314	2.83258e-09	4.70046	2.50225	Tardbp	protein_coding	TAR DNA binding protein [Source:MGI Symbol;Acc:MGI:2387629]
ENSMUSG00000031781	-0.961587	2.84607e-09	2.83262	1.8541	Ciapin1	protein_coding	cytokine induced apoptosis inhibitor 1 [Source:MGI Symbol;Acc:MGI:1922083]
ENSMUSG00000034574	-1.82609	2.88127e-09	4.69711	2.84429	Daam1	protein_coding	dishevelled associated activator of morphogenesis 1 [Source:MGI Symbol;Acc:MGI:1914596]
ENSMUSG00000024194	-1.61097	2.88568e-09	3.27494	1.64494	Cuta	protein_coding	cutA divalent cation tolerance homolog [Source:MGI Symbol;Acc:MGI:1914925]
ENSMUSG00000078896	-0.69809	2.89179e-09	1.08929	0.374398	Zfp965	protein_coding	zinc finger protein 965 [Source:MGI Symbol;Acc:MGI:3779822]
ENSMUSG00000032009	-0.530639	2.89858e-09	1.197	0.653647	Sesn3	protein_coding	sestrin 3 [Source:MGI Symbol;Acc:MGI:1922997]
ENSMUSG00000009112	-0.422986	2.89923e-09	1.58705	1.15236	Bcl2l13	protein_coding	BCL2-like 13 (apoptosis facilitator) [Source:MGI Symbol;Acc:MGI:2136959]
ENSMUSG00000024614	-0.642614	2.90413e-09	1.46635	0.810874	Tmx3	protein_coding	thioredoxin-related transmembrane protein 3 [Source:MGI Symbol;Acc:MGI:2442418]
ENSMUSG00000029763	-0.943421	2.90413e-09	1.81404	0.85681	Exoc4	protein_coding	exocyst complex component 4 [Source:MGI Symbol;Acc:MGI:1096376]
ENSMUSG00000032405	-0.507307	2.91651e-09	0.952282	0.424344	Pias1	protein_coding	protein inhibitor of activated STAT 1 [Source:MGI Symbol;Acc:MGI:1913125]
ENSMUSG00000030120	-1.48456	2.91735e-09	4.21641	2.70625	Mlf2	protein_coding	myeloid leukemia factor 2 [Source:MGI Symbol;Acc:MGI:1353554]
ENSMUSG00000070697	-0.970422	2.94156e-09	2.13413	1.1491	Utp3	protein_coding	UTP3 small subunit processome component [Source:MGI Symbol;Acc:MGI:1919230]
ENSMUSG00000032042	-1.02612	2.9532e-09	2.68839	1.64617	Srpr	protein_coding	signal recognition particle receptor ('docking protein') [Source:MGI Symbol;Acc:MGI:1914648]
ENSMUSG00000027900	-1.92754	2.9532e-09	4.1292	2.17874	Dram2	protein_coding	DNA-damage regulated autophagy modulator 2 [Source:MGI Symbol;Acc:MGI:1914421]
ENSMUSG00000029777	-1.21742	2.96033e-09	3.26812	2.03185	Gars	protein_coding	glycyl-tRNA synthetase [Source:MGI Symbol;Acc:MGI:2449057]
ENSMUSG00000063253	-1.76494	2.96745e-09	3.78362	1.99847	Scoc	protein_coding	short coiled-coil protein [Source:MGI Symbol;Acc:MGI:1927654]
ENSMUSG00000024537	-0.696793	2.98667e-09	1.64364	0.934656	Psmg2	protein_coding	proteasome (prosome, macropain) assembly chaperone 2 [Source:MGI Symbol;Acc:MGI:1922901]
ENSMUSG00000002329	-0.893827	2.9891e-09	3.12484	2.21268	Mdp1	protein_coding	magnesium-dependent phosphatase 1 [Source:MGI Symbol;Acc:MGI:1915131]
ENSMUSG00000027828	-1.42816	2.99991e-09	4.19616	2.74096	Ssr3	protein_coding	signal sequence receptor, gamma [Source:MGI Symbol;Acc:MGI:1914687]
ENSMUSG00000021770	-0.541185	3.00157e-09	1.22182	0.667108	Samd8	protein_coding	sterile alpha motif domain containing 8 [Source:MGI Symbol;Acc:MGI:1914880]
ENSMUSG00000035105	-0.843114	3.00473e-09	2.00272	1.14649	Egln3	protein_coding	egl-9 family hypoxia-inducible factor 3 [Source:MGI Symbol;Acc:MGI:1932288]
ENSMUSG00000028085	-1.12386	3.00473e-09	2.74373	1.60418	Gatb	protein_coding	glutamyl-tRNA(Gln) amidotransferase, subunit B [Source:MGI Symbol;Acc:MGI:2442496]
ENSMUSG00000038729	-2.11655	3.03719e-09	5.51038	3.36241	Akap2	protein_coding	A kinase (PRKA) anchor protein 2 [Source:MGI Symbol;Acc:MGI:1306795]
ENSMUSG00000032679	-1.31141	3.07186e-09	4.90524	3.55713	Cd59a	protein_coding	CD59a antigen [Source:MGI Symbol;Acc:MGI:109177]
ENSMUSG00000035473	-0.451639	3.08029e-09	0.7729	0.303016	Galm	protein_coding	galactose mutarotase [Source:MGI Symbol;Acc:MGI:2442420]
ENSMUSG00000031197	-0.699029	3.08306e-09	2.53185	1.81734	Vbp1	protein_coding	von Hippel-Lindau binding protein 1 [Source:MGI Symbol;Acc:MGI:1333804]
ENSMUSG00000029328	-1.13799	3.10095e-09	3.64744	2.48739	Hnrnpdl	protein_coding	heterogeneous nuclear ribonucleoprotein D-like [Source:MGI Symbol;Acc:MGI:1355299]
ENSMUSG00000049658	-0.716778	3.12569e-09	2.12414	1.39069	Bdp1	protein_coding	B double prime 1, subunit of RNA polymerase III transcription initiation factor IIIB [Source:MGI Symbol;Acc:MGI:1347077]
ENSMUSG00000038335	-0.551549	3.13114e-09	1.05082	0.483668	Tsr1	protein_coding	TSR1 20S rRNA accumulation [Source:MGI Symbol;Acc:MGI:2144566]
ENSMUSG00000019851	-1.40646	3.1401e-09	5.46376	4.00324	Perp	protein_coding	PERP, TP53 apoptosis effector [Source:MGI Symbol;Acc:MGI:1929938]
ENSMUSG00000045691	-0.753338	3.14437e-09	1.16738	0.394471	Thtpa	protein_coding	thiamine triphosphatase [Source:MGI Symbol;Acc:MGI:2446078]
ENSMUSG00000002007	-0.559107	3.16027e-09	1.94742	1.37547	Srpk3	protein_coding	serine/arginine-rich protein specific kinase 3 [Source:MGI Symbol;Acc:MGI:1891338]
ENSMUSG00000005803	-1.35957	3.16027e-09	2.28095	0.905994	Sqor	protein_coding	sulfide quinone oxidoreductase [Source:MGI Symbol;Acc:MGI:1929899]
ENSMUSG00000040006	-2.10645	3.16027e-09	4.68835	2.55897	Ginm1	protein_coding	glycoprotein integral membrane 1 [Source:MGI Symbol;Acc:MGI:2384905]
ENSMUSG00000037820	-1.0952	3.16762e-09	3.42522	2.30961	Tgm2	protein_coding	transglutaminase 2, C polypeptide [Source:MGI Symbol;Acc:MGI:98731]
ENSMUSG00000079334	-0.340587	3.17961e-09	1.0235	0.672372	Nat6	protein_coding	N-acetyltransferase 6 [Source:MGI Symbol;Acc:MGI:1888902]
ENSMUSG00000021929	-1.34802	3.21892e-09	3.5036	2.1356	Kpna3	protein_coding	karyopherin (importin) alpha 3 [Source:MGI Symbol;Acc:MGI:1100863]
ENSMUSG00000024943	-1.17464	3.21897e-09	1.78155	0.584733	Smc5	protein_coding	structural maintenance of chromosomes 5 [Source:MGI Symbol;Acc:MGI:2385088]
ENSMUSG00000023051	-1.35613	3.21897e-09	2.53341	1.1603	Tarbp2	protein_coding	TARBP2, RISC loading complex RNA binding subunit [Source:MGI Symbol;Acc:MGI:103027]
ENSMUSG00000050188	-0.613355	3.22971e-09	1.57695	0.945278	Lsm10	protein_coding	U7 snRNP-specific Sm-like protein LSM10 [Source:MGI Symbol;Acc:MGI:2151045]
ENSMUSG00000037111	-0.940853	3.2657e-09	2.0757	1.1214	Setd7	protein_coding	SET domain containing (lysine methyltransferase) 7 [Source:MGI Symbol;Acc:MGI:1920501]
ENSMUSG00000036712	-1.49341	3.2657e-09	2.6664	1.15082	Cyld	protein_coding	CYLD lysine 63 deubiquitinase [Source:MGI Symbol;Acc:MGI:1921506]
ENSMUSG00000042446	-0.554026	3.27379e-09	0.947814	0.374254	Zmym4	protein_coding	zinc finger, MYM-type 4 [Source:MGI Symbol;Acc:MGI:1915035]
ENSMUSG00000040268	-1.09486	3.27379e-09	1.74171	0.630175	Plekha1	protein_coding	pleckstrin homology domain containing, family A (phosphoinositide binding specific) member 1 [Source:MGI Symbol;Acc:MGI:2442213]
ENSMUSG00000030795	-1.27344	3.27451e-09	3.43706	2.14366	Fus	protein_coding	fused in sarcoma [Source:MGI Symbol;Acc:MGI:1353633]
ENSMUSG00000025584	-0.544781	3.3051e-09	1.30454	0.745974	Pde8a	protein_coding	phosphodiesterase 8A [Source:MGI Symbol;Acc:MGI:1277116]
ENSMUSG00000001036	-1.33958	3.31375e-09	1.83888	0.470032	Epn2	protein_coding	epsin 2 [Source:MGI Symbol;Acc:MGI:1333766]
ENSMUSG00000071369	-1.09453	3.31862e-09	1.96383	0.85403	Map3k5	protein_coding	mitogen-activated protein kinase kinase kinase 5 [Source:MGI Symbol;Acc:MGI:1346876]
ENSMUSG00000021241	-0.579067	3.32512e-09	2.26666	1.67376	Isca2	protein_coding	iron-sulfur cluster assembly 2 [Source:MGI Symbol;Acc:MGI:1921566]
ENSMUSG00000030967	-1.50005	3.32867e-09	3.28431	1.76623	Zranb1	protein_coding	zinc finger, RAN-binding domain containing 1 [Source:MGI Symbol;Acc:MGI:106441]
ENSMUSG00000042410	-0.363591	3.33423e-09	1.4878	1.11119	Agps	protein_coding	alkylglycerone phosphate synthase [Source:MGI Symbol;Acc:MGI:2443065]
ENSMUSG00000090150	-1.46457	3.34055e-09	4.30795	2.81694	Acad11	protein_coding	acyl-Coenzyme A dehydrogenase family, member 11 [Source:MGI Symbol;Acc:MGI:2143169]
ENSMUSG00000011877	-0.732726	3.34727e-09	2.05356	1.3061	Git1	protein_coding	G protein-coupled receptor kinase-interactor 1 [Source:MGI Symbol;Acc:MGI:1927140]
ENSMUSG00000054612	-0.747776	3.34727e-09	1.36307	0.601646	Mgmt	protein_coding	O-6-methylguanine-DNA methyltransferase [Source:MGI Symbol;Acc:MGI:96977]
ENSMUSG00000060036	-1.4303	3.34727e-09	3.64236	2.19147	Rpl3	protein_coding	ribosomal protein L3 [Source:MGI Symbol;Acc:MGI:1351605]
ENSMUSG00000022466	-0.576099	3.35685e-09	1.55558	0.965676	Rpap3	protein_coding	RNA polymerase II associated protein 3 [Source:MGI Symbol;Acc:MGI:1277218]
ENSMUSG00000068739	-1.41488	3.3573e-09	3.59492	2.15973	Sars	protein_coding	seryl-aminoacyl-tRNA synthetase [Source:MGI Symbol;Acc:MGI:102809]
ENSMUSG00000049299	-1.55836	3.37364e-09	2.56639	0.989287	Trappc1	protein_coding	trafficking protein particle complex 1 [Source:MGI Symbol;Acc:MGI:1098727]
ENSMUSG00000039221	-1.58906	3.38033e-09	3.27797	1.67006	Rpl22l1	protein_coding	ribosomal protein L22 like 1 [Source:MGI Symbol;Acc:MGI:1915278]
ENSMUSG00000068290	-0.562769	3.38778e-09	3.12169	2.5414	Ddrgk1	protein_coding	DDRGK domain containing 1 [Source:MGI Symbol;Acc:MGI:1924256]
ENSMUSG00000038485	-0.778192	3.40644e-09	1.08176	0.290447	Socs7	protein_coding	suppressor of cytokine signaling 7 [Source:MGI Symbol;Acc:MGI:2651588]
ENSMUSG00000073889	-1.61937	3.40644e-09	4.75498	3.10724	Il11ra1	protein_coding	interleukin 11 receptor, alpha chain 1 [Source:MGI Symbol;Acc:MGI:107426]
ENSMUSG00000028465	-0.821631	3.41121e-09	2.2224	1.38655	Tln1	protein_coding	talin 1 [Source:MGI Symbol;Acc:MGI:1099832]
ENSMUSG00000021012	-1.92697	3.43153e-09	3.47292	1.52523	Zc3h14	protein_coding	zinc finger CCCH type containing 14 [Source:MGI Symbol;Acc:MGI:1919824]
ENSMUSG00000021248	-1.1088	3.43461e-09	3.48303	2.35375	Tmed10	protein_coding	transmembrane p24 trafficking protein 10 [Source:MGI Symbol;Acc:MGI:1915831]
ENSMUSG00000021109	-1.38753	3.45068e-09	3.62095	2.21246	Hif1a	protein_coding	hypoxia inducible factor 1, alpha subunit [Source:MGI Symbol;Acc:MGI:106918]
ENSMUSG00000020650	-1.64218	3.45068e-09	3.63165	1.96961	Bcap29	protein_coding	B cell receptor associated protein 29 [Source:MGI Symbol;Acc:MGI:101917]
ENSMUSG00000060373	-1.61814	3.45279e-09	4.50304	2.85849	Hnrnpc	protein_coding	heterogeneous nuclear ribonucleoprotein C [Source:MGI Symbol;Acc:MGI:107795]
ENSMUSG00000013419	-0.933121	3.4569e-09	3.33607	2.38298	Zfp651	protein_coding	zinc finger protein 651 [Source:MGI Symbol;Acc:MGI:2670992]
ENSMUSG00000030956	-1.04831	3.46805e-09	1.66509	0.596522	Fam53b	protein_coding	family with sequence similarity 53, member B [Source:MGI Symbol;Acc:MGI:1925188]
ENSMUSG00000021143	-1.23785	3.47169e-09	1.69233	0.441841	Pacs2	protein_coding	phosphofurin acidic cluster sorting protein 2 [Source:MGI Symbol;Acc:MGI:1924399]
ENSMUSG00000026918	-1.69582	3.4807e-09	2.62037	0.904393	Brd3	protein_coding	bromodomain containing 3 [Source:MGI Symbol;Acc:MGI:1914632]
ENSMUSG00000020034	-1.3355	3.48744e-09	3.74421	2.38669	Tcp11l2	protein_coding	t-complex 11 (mouse) like 2 [Source:MGI Symbol;Acc:MGI:2444679]
ENSMUSG00000026427	-0.749175	3.49755e-09	1.14737	0.380922	Eif2d	protein_coding	eukaryotic translation initiation factor 2D [Source:MGI Symbol;Acc:MGI:109342]
ENSMUSG00000035248	-1.01646	3.49755e-09	1.95101	0.918425	Zcchc6	protein_coding	zinc finger, CCHC domain containing 6 [Source:MGI Symbol;Acc:MGI:2387179]
ENSMUSG00000019738	-1.43142	3.50298e-09	3.42895	1.97824	Polr2i	protein_coding	polymerase (RNA) II (DNA directed) polypeptide I [Source:MGI Symbol;Acc:MGI:1917170]
ENSMUSG00000010054	-0.784247	3.5431e-09	1.72691	0.929934	Tusc2	protein_coding	tumor suppressor candidate 2 [Source:MGI Symbol;Acc:MGI:1931086]
ENSMUSG00000019087	-1.03149	3.5431e-09	2.64498	1.59778	Atp6ap1	protein_coding	ATPase, H+ transporting, lysosomal accessory protein 1 [Source:MGI Symbol;Acc:MGI:109629]
ENSMUSG00000032575	-1.54854	3.55705e-09	3.16554	1.5981	Manf	protein_coding	mesencephalic astrocyte-derived neurotrophic factor [Source:MGI Symbol;Acc:MGI:1922090]
ENSMUSG00000024404	-1.41631	3.57315e-09	3.19788	1.76405	Riok3	protein_coding	RIO kinase 3 [Source:MGI Symbol;Acc:MGI:1914128]
ENSMUSG00000025162	-0.502368	3.59171e-09	1.34641	0.827896	Csnk1d	protein_coding	casein kinase 1, delta [Source:MGI Symbol;Acc:MGI:1355272]
ENSMUSG00000024082	-0.359221	3.59513e-09	1.25206	0.881792	Ndufaf7	protein_coding	NADH dehydrogenase (ubiquinone) 1 alpha subcomplex assembly factor 7 [Source:MGI Symbol;Acc:MGI:1920944]
ENSMUSG00000020903	-0.941026	3.6669e-09	2.25128	1.29571	Stx8	protein_coding	syntaxin 8 [Source:MGI Symbol;Acc:MGI:1890156]
ENSMUSG00000032238	-0.726052	3.67084e-09	1.62188	0.880866	Rora	protein_coding	RAR-related orphan receptor alpha [Source:MGI Symbol;Acc:MGI:104661]
ENSMUSG00000053907	-1.52759	3.67413e-09	3.71559	2.16722	Mat2a	protein_coding	methionine adenosyltransferase II, alpha [Source:MGI Symbol;Acc:MGI:2443731]
ENSMUSG00000028136	-0.417236	3.6914e-09	1.10843	0.67777	Snx27	protein_coding	sorting nexin family member 27 [Source:MGI Symbol;Acc:MGI:1923992]
ENSMUSG00000024772	-0.765378	3.70245e-09	1.69779	0.920529	Ehd1	protein_coding	EH-domain containing 1 [Source:MGI Symbol;Acc:MGI:1341878]
ENSMUSG00000038400	-0.963333	3.70245e-09	1.83135	0.854732	Pmepa1	protein_coding	prostate transmembrane protein, androgen induced 1 [Source:MGI Symbol;Acc:MGI:1929600]
ENSMUSG00000035851	-1.89511	3.70245e-09	2.76665	0.853435	Ythdc1	protein_coding	YTH domain containing 1 [Source:MGI Symbol;Acc:MGI:2443713]
ENSMUSG00000078249	-1.00388	3.71776e-09	2.13898	1.1223	Hmga1b	protein_coding	high mobility group AT-hook 1B [Source:MGI Symbol;Acc:MGI:96161]
ENSMUSG00000021690	-0.83074	3.71894e-09	2.47958	1.6333	Jmy	protein_coding	junction-mediating and regulatory protein [Source:MGI Symbol;Acc:MGI:1913096]
ENSMUSG00000024068	-1.14454	3.71894e-09	2.22652	1.06557	Spast	protein_coding	spastin [Source:MGI Symbol;Acc:MGI:1858896]
ENSMUSG00000008976	-0.464866	3.72925e-09	1.69973	1.2216	Gabpa	protein_coding	GA repeat binding protein, alpha [Source:MGI Symbol;Acc:MGI:95610]
ENSMUSG00000060152	-0.974633	3.76676e-09	2.29796	1.30871	Pop5	protein_coding	processing of precursor 5, ribonuclease P/MRP family (S. cerevisiae) [Source:MGI Symbol;Acc:MGI:2151221]
ENSMUSG00000021619	-1.17122	3.76676e-09	2.13855	0.953249	Atg10	protein_coding	autophagy related 10 [Source:MGI Symbol;Acc:MGI:1914045]
ENSMUSG00000015806	-1.7256	3.77435e-09	4.95941	3.20524	Qdpr	protein_coding	quinoid dihydropteridine reductase [Source:MGI Symbol;Acc:MGI:97836]
ENSMUSG00000020400	-1.40632	3.77722e-09	2.35026	0.924551	Tnip1	protein_coding	TNFAIP3 interacting protein 1 [Source:MGI Symbol;Acc:MGI:1926194]
ENSMUSG00000002205	-0.569062	3.84121e-09	0.814534	0.227152	Vrk3	protein_coding	vaccinia related kinase 3 [Source:MGI Symbol;Acc:MGI:2182465]
ENSMUSG00000062762	-1.3047	3.85676e-09	2.14918	0.826999	Ei24	protein_coding	etoposide induced 2.4 mRNA [Source:MGI Symbol;Acc:MGI:108090]
ENSMUSG00000034757	-0.719009	3.85678e-09	1.10713	0.369713	Tmub2	protein_coding	transmembrane and ubiquitin-like domain containing 2 [Source:MGI Symbol;Acc:MGI:1919303]
ENSMUSG00000018199	-1.11432	3.86867e-09	1.55658	0.424778	Trove2	protein_coding	TROVE domain family, member 2 [Source:MGI Symbol;Acc:MGI:106652]
ENSMUSG00000028145	-0.856281	3.87685e-09	1.1138	0.244428	Them4	protein_coding	thioesterase superfamily member 4 [Source:MGI Symbol;Acc:MGI:1923028]
ENSMUSG00000016503	-0.836869	3.88172e-09	1.6845	0.828561	Gtf3a	protein_coding	general transcription factor III A [Source:MGI Symbol;Acc:MGI:1913846]
ENSMUSG00000006998	-1.42782	3.88612e-09	4.60652	3.14569	Psmd2	protein_coding	proteasome (prosome, macropain) 26S subunit, non-ATPase, 2 [Source:MGI Symbol;Acc:MGI:1096584]
ENSMUSG00000016510	-0.984987	3.90602e-09	2.76168	1.75861	Mtif3	protein_coding	mitochondrial translational initiation factor 3 [Source:MGI Symbol;Acc:MGI:1923616]
ENSMUSG00000042793	-1.08154	3.93087e-09	1.38722	0.289856	Lgr6	protein_coding	leucine-rich repeat-containing G protein-coupled receptor 6 [Source:MGI Symbol;Acc:MGI:2441805]
ENSMUSG00000022210	-0.258707	3.93767e-09	2.22794	1.95651	Dhrs4	protein_coding	dehydrogenase/reductase (SDR family) member 4 [Source:MGI Symbol;Acc:MGI:90169]
ENSMUSG00000033020	-0.93428	3.95547e-09	3.18289	2.23008	Polr2f	protein_coding	polymerase (RNA) II (DNA directed) polypeptide F [Source:MGI Symbol;Acc:MGI:1349393]
ENSMUSG00000018287	-0.501613	3.96211e-09	2.90371	2.38409	Spag7	protein_coding	sperm associated antigen 7 [Source:MGI Symbol;Acc:MGI:107380]
ENSMUSG00000021417	-2.13462	3.96829e-09	6.61554	4.43906	Eci2	protein_coding	enoyl-Coenzyme A delta isomerase 2 [Source:MGI Symbol;Acc:MGI:1346064]
ENSMUSG00000094103	-0.703354	3.98388e-09	2.50592	1.78803	1700047I17Rik2	protein_coding	RIKEN cDNA 1700047I17 gene 2 [Source:MGI Symbol;Acc:MGI:3714351]
ENSMUSG00000024042	-0.392227	3.98418e-09	0.805509	0.404171	Sik1	protein_coding	salt inducible kinase 1 [Source:MGI Symbol;Acc:MGI:104754]
ENSMUSG00000024160	-1.31762	3.98857e-09	2.31011	0.97122	Spsb3	protein_coding	splA/ryanodine receptor domain and SOCS box containing 3 [Source:MGI Symbol;Acc:MGI:1891471]
ENSMUSG00000057914	-0.924592	4.01452e-09	1.90229	0.963351	Cacnb2	protein_coding	calcium channel, voltage-dependent, beta 2 subunit [Source:MGI Symbol;Acc:MGI:894644]
ENSMUSG00000020250	-1.34518	4.01866e-09	3.19584	1.83165	Txnrd1	protein_coding	thioredoxin reductase 1 [Source:MGI Symbol;Acc:MGI:1354175]
ENSMUSG00000034161	-0.54389	4.02962e-09	0.775617	0.21114	Scx	protein_coding	scleraxis [Source:MGI Symbol;Acc:MGI:102934]
ENSMUSG00000037149	-1.32975	4.03883e-09	3.99613	2.64286	Ddx1	protein_coding	DEAD (Asp-Glu-Ala-Asp) box polypeptide 1 [Source:MGI Symbol;Acc:MGI:2144727]
ENSMUSG00000056076	-0.815277	4.03996e-09	3.38036	2.54479	Eif3b	protein_coding	eukaryotic translation initiation factor 3, subunit B [Source:MGI Symbol;Acc:MGI:106478]
ENSMUSG00000050315	-1.23297	4.05277e-09	4.20796	2.95045	Synpo2	protein_coding	synaptopodin 2 [Source:MGI Symbol;Acc:MGI:2153070]
ENSMUSG00000019945	-0.732159	4.05867e-09	1.16803	0.419248	Cabcoco1	protein_coding	ciliary associated calcium binding coiled-coil 1 [Source:MGI Symbol;Acc:MGI:1920537]
ENSMUSG00000002996	-1.11137	4.0719e-09	2.12567	1.00029	Hbp1	protein_coding	high mobility group box transcription factor 1 [Source:MGI Symbol;Acc:MGI:894659]
ENSMUSG00000041921	-0.75342	4.10932e-09	1.16965	0.403241	Metap1d	protein_coding	methionyl aminopeptidase type 1D (mitochondrial) [Source:MGI Symbol;Acc:MGI:1913809]
ENSMUSG00000025243	-0.766005	4.10932e-09	1.19663	0.40846	Slc6a20b	protein_coding	solute carrier family 6 (neurotransmitter transporter), member 20B [Source:MGI Symbol;Acc:MGI:1336891]
ENSMUSG00000021044	-1.29448	4.10932e-09	2.22509	0.91443	Adck1	protein_coding	aarF domain containing kinase 1 [Source:MGI Symbol;Acc:MGI:1919363]
ENSMUSG00000051586	-0.73035	4.11214e-09	2.09035	1.34604	Mical3	protein_coding	microtubule associated monooxygenase, calponin and LIM domain containing 3 [Source:MGI Symbol;Acc:MGI:2442733]
ENSMUSG00000031353	-1.35256	4.12537e-09	6.14476	4.7285	Rbbp7	protein_coding	retinoblastoma binding protein 7, chromatin remodeling factor [Source:MGI Symbol;Acc:MGI:1194910]
ENSMUSG00000038733	-1.98398	4.12537e-09	4.90816	2.89836	Wdr26	protein_coding	WD repeat domain 26 [Source:MGI Symbol;Acc:MGI:1923825]
ENSMUSG00000034158	-0.597127	4.12939e-09	2.35027	1.73914	Lrrc58	protein_coding	leucine rich repeat containing 58 [Source:MGI Symbol;Acc:MGI:2443542]
ENSMUSG00000024158	-1.12869	4.12939e-09	4.30822	3.1543	Hagh	protein_coding	hydroxyacyl glutathione hydrolase [Source:MGI Symbol;Acc:MGI:95745]
ENSMUSG00000025362	-1.13558	4.13837e-09	5.29464	4.10394	Rps26	protein_coding	ribosomal protein S26 [Source:MGI Symbol;Acc:MGI:1351628]
ENSMUSG00000013662	-0.869722	4.14529e-09	2.93135	2.0445	Atad1	protein_coding	ATPase family, AAA domain containing 1 [Source:MGI Symbol;Acc:MGI:1915229]
ENSMUSG00000028990	-0.870552	4.15884e-09	1.09829	0.212925	Lzic	protein_coding	leucine zipper and CTNNBIP1 domain containing [Source:MGI Symbol;Acc:MGI:1916401]
ENSMUSG00000021607	-1.26518	4.17202e-09	3.84559	2.55803	Mrpl36	protein_coding	mitochondrial ribosomal protein L36 [Source:MGI Symbol;Acc:MGI:2137228]
ENSMUSG00000040667	-1.71497	4.17234e-09	3.26295	1.52829	Nup88	protein_coding	nucleoporin 88 [Source:MGI Symbol;Acc:MGI:104900]
ENSMUSG00000035762	-0.341283	4.20618e-09	1.12528	0.769789	Tmem161b	protein_coding	transmembrane protein 161B [Source:MGI Symbol;Acc:MGI:1919995]
ENSMUSG00000030516	-0.598852	4.25127e-09	1.55963	0.946054	Tjp1	protein_coding	tight junction protein 1 [Source:MGI Symbol;Acc:MGI:98759]
ENSMUSG00000028898	-0.971956	4.25127e-09	1.62096	0.632076	Trnau1ap	protein_coding	tRNA selenocysteine 1 associated protein 1 [Source:MGI Symbol;Acc:MGI:1919037]
ENSMUSG00000038628	-0.933805	4.25549e-09	1.5522	0.604491	Polr3k	protein_coding	polymerase (RNA) III (DNA directed) polypeptide K [Source:MGI Symbol;Acc:MGI:1914255]
ENSMUSG00000032180	-0.76366	4.30131e-09	2.03432	1.25749	Tmed1	protein_coding	transmembrane p24 trafficking protein 1 [Source:MGI Symbol;Acc:MGI:106201]
ENSMUSG00000027835	-0.61923	4.31515e-09	1.3297	0.696009	Pdcd10	protein_coding	programmed cell death 10 [Source:MGI Symbol;Acc:MGI:1928396]
ENSMUSG00000055053	-0.778893	4.31684e-09	2.58499	1.7909	Nfic	protein_coding	nuclear factor I/C [Source:MGI Symbol;Acc:MGI:109591]
[truncated: 5,907 more rows]

## Sheet: Supplementary table 3
Supplementary table 3 - Expression of cardiac marker genes between Hif1a+ and Hif1a- cardiomyocytes
ENSEMBL_geneID	log-fold-change	FDR	Expression_Hif1a+	Expression_Hif1a-	Gene_Symbol	Biotype	Description
ENSMUSG00000013936	0.00102488	1	12.8044	12.8034	Myl2	protein_coding	myosin, light polypeptide 2, regulatory, cardiac, slow [Source:MGI Symbol;Acc:MGI:97272]
ENSMUSG00000040752	0.00561741	0.999248	11.6726	11.667	Myh6	protein_coding	myosin, heavy polypeptide 6, cardiac muscle, alpha [Source:MGI Symbol;Acc:MGI:97255]
ENSMUSG00000053093	0.00747241	0.998175	11.6318	11.6243	Myh7	protein_coding	myosin, heavy polypeptide 7, cardiac muscle, beta [Source:MGI Symbol;Acc:MGI:2155600]
ENSMUSG00000091898	-0.0188849	0.978119	10.537	10.5559	Tnnc1	protein_coding	troponin C, cardiac/slow skeletal [Source:MGI Symbol;Acc:MGI:98779]
ENSMUSG00000029467	-0.0236144	0.962733	11.574	11.5976	Atp2a2	protein_coding	ATPase, Ca++ transporting, cardiac muscle, slow twitch 2 [Source:MGI Symbol;Acc:MGI:88110]
ENSMUSG00000002100	0.111605	0.624608	11.0394	10.9278	Mybpc3	protein_coding	myosin binding protein C, cardiac [Source:MGI Symbol;Acc:MGI:102844]
ENSMUSG00000024803	0.220761	0.604117	8.61932	8.39849	Ankrd1	protein_coding	ankyrin repeat domain 1 (cardiac muscle) [Source:MGI Symbol;Acc:MGI:1097717]
ENSMUSG00000068614	-0.0763729	0.595534	11.474	11.5504	Actc1	protein_coding	actin, alpha, cardiac muscle 1 [Source:MGI Symbol;Acc:MGI:87905]
ENSMUSG00000035458	-0.0837545	0.541729	11.3154	11.3992	Tnni3	protein_coding	troponin I, cardiac 3 [Source:MGI Symbol;Acc:MGI:98783]
ENSMUSG00000021313	0.101778	0.534411	8.91668	8.84103	Ryr2	protein_coding	ryanodine receptor 2, cardiac [Source:MGI Symbol;Acc:MGI:99685]
ENSMUSG00000047419	0.068145	0.365059	7.65274	7.54915	Cmya5	protein_coding	cardiomyopathy associated 5 [Source:MGI Symbol;Acc:MGI:1923719]
ENSMUSG00000029683	0.328432	0.191779	6.83745	6.48634	Lmod2	protein_coding	leiomodin 2 (cardiac) [Source:MGI Symbol;Acc:MGI:2135672]
ENSMUSG00000006221	0.230471	0.188524	2.55782	2.32272	Hspb7	protein_coding	heat shock protein family, member 7 (cardiovascular) [Source:MGI Symbol;Acc:MGI:1352494]
ENSMUSG00000026414	-0.146313	0.182182	14.4986	14.645	Tnnt2	protein_coding	troponin T2, cardiac [Source:MGI Symbol;Acc:MGI:104597]
ENSMUSG00000042340	0.168528	0.129001	0.361445	0.187166	Ctf1	protein_coding	cardiotrophin 1 [Source:MGI Symbol;Acc:MGI:105115]
ENSMUSG00000009569	0.231956	0.107127	0.753814	0.517043	Mkl2	protein_coding	MKL/myocardin-like 2 [Source:MGI Symbol;Acc:MGI:3050795]

## Sheet: Supplementary table 4
Supplementary table 4 -Differentially expressed genes between Hif1a+ and Hif1a- cardiomyocytes (FDR < 0.01)
ENSEMBL_geneID	log-fold-change	FDR	Expression_Hif1a+	Expression_Hif1a-	Gene_Symbol	Biotype	Description
ENSMUSG00000021109	5.25019	7.11069e-76	5.37826	0.0812299	Hif1a	protein_coding	hypoxia inducible factor 1, alpha subunit [Source:MGI Symbol;Acc:MGI:106918]
ENSMUSG00000070056	1.36719	1.08903e-05	2.53241	1.15164	Mfhas1	protein_coding	malignant fibrous histiocytoma amplified sequence 1 [Source:MGI Symbol;Acc:MGI:1098644]
ENSMUSG00000019864	1.17667	1.65179e-05	2.94947	1.75732	Rtn4ip1	protein_coding	reticulon 4 interacting protein 1 [Source:MGI Symbol;Acc:MGI:2178759]
ENSMUSG00000031392	1.67384	2.97457e-05	3.59065	1.89982	Irak1	protein_coding	interleukin-1 receptor-associated kinase 1 [Source:MGI Symbol;Acc:MGI:107420]
ENSMUSG00000037266	-0.256385	3.78722e-05	1.11522	1.36573	Rsrp1	protein_coding	arginine/serine rich protein 1 [Source:MGI Symbol;Acc:MGI:106498]
ENSMUSG00000020936	1.11877	7.65841e-05	3.03769	1.9044	Nmt1	protein_coding	N-myristoyltransferase 1 [Source:MGI Symbol;Acc:MGI:102579]
ENSMUSG00000032547	0.950211	7.65841e-05	1.62314	0.660588	Ryk	protein_coding	receptor-like tyrosine kinase [Source:MGI Symbol;Acc:MGI:101766]
ENSMUSG00000021709	1.71561	8.54477e-05	3.99801	2.26293	Erbin	protein_coding	Erbb2 interacting protein [Source:MGI Symbol;Acc:MGI:1890169]
ENSMUSG00000017615	1.24119	8.54477e-05	2.6984	1.44275	Tnfaip1	protein_coding	tumor necrosis factor, alpha-induced protein 1 (endothelial) [Source:MGI Symbol;Acc:MGI:104961]
ENSMUSG00000071317	0.754947	8.54477e-05	2.66009	1.89223	Bves	protein_coding	blood vessel epicardial substance [Source:MGI Symbol;Acc:MGI:1346013]
ENSMUSG00000021892	1.51856	0.000115171	3.05685	1.52513	Sh3bp5	protein_coding	SH3-domain binding protein 5 (BTK-associated) [Source:MGI Symbol;Acc:MGI:1344391]
ENSMUSG00000022568	0.821381	0.00011682	1.07235	0.233085	Scrib	protein_coding	scribbled planar cell polarity [Source:MGI Symbol;Acc:MGI:2145950]
ENSMUSG00000048279	0.38818	0.00011682	1.80446	1.40603	Sacs	protein_coding	sacsin [Source:MGI Symbol;Acc:MGI:1354724]
ENSMUSG00000028890	0.542869	0.000138889	2.01046	1.45636	Mtf1	protein_coding	metal response element binding transcription factor 1 [Source:MGI Symbol;Acc:MGI:101786]
ENSMUSG00000020107	1.74509	0.000141578	4.14929	2.38687	Anapc16	protein_coding	anaphase promoting complex subunit 16 [Source:MGI Symbol;Acc:MGI:1289325]
ENSMUSG00000033228	1.43217	0.000141578	3.39476	1.94841	Scaf11	protein_coding	SR-related CTD-associated factor 11 [Source:MGI Symbol;Acc:MGI:1919443]
ENSMUSG00000003199	1.20777	0.000141578	3.45391	2.23019	Mpnd	protein_coding	MPN domain containing [Source:MGI Symbol;Acc:MGI:1915297]
ENSMUSG00000011179	1.03375	0.000141578	3.21626	2.16764	Odc1	protein_coding	ornithine decarboxylase, structural 1 [Source:MGI Symbol;Acc:MGI:97402]
ENSMUSG00000035575	0.640291	0.000141578	1.10534	0.452113	Utp6	protein_coding	UTP6 small subunit processome component [Source:MGI Symbol;Acc:MGI:2445193]
ENSMUSG00000035086	1.24875	0.000149513	2.4678	1.20664	Becn1	protein_coding	beclin 1, autophagy related [Source:MGI Symbol;Acc:MGI:1891828]
ENSMUSG00000062619	1.23371	0.000153384	2.41197	1.16714	2310039H08Rik	protein_coding	RIKEN cDNA 2310039H08 gene [Source:MGI Symbol;Acc:MGI:1914351]
ENSMUSG00000042133	0.632281	0.000153384	3.5983	2.9505	Ppig	protein_coding	peptidyl-prolyl isomerase G (cyclophilin G) [Source:MGI Symbol;Acc:MGI:2445173]
ENSMUSG00000029864	0.832748	0.000153711	3.66399	2.81348	Gstk1	protein_coding	glutathione S-transferase kappa 1 [Source:MGI Symbol;Acc:MGI:1923513]
ENSMUSG00000020238	1.1933	0.000160238	2.24217	1.03616	Ncln	protein_coding	nicalin [Source:MGI Symbol;Acc:MGI:1926081]
ENSMUSG00000024231	1.27611	0.000179122	2.65546	1.3667	Cul2	protein_coding	cullin 2 [Source:MGI Symbol;Acc:MGI:1918995]
ENSMUSG00000022358	1.2859	0.000182792	4.37056	3.06408	Fbxo32	protein_coding	F-box protein 32 [Source:MGI Symbol;Acc:MGI:1914981]
ENSMUSG00000032112	0.755023	0.000196739	2.18914	1.42241	Trappc4	protein_coding	trafficking protein particle complex 4 [Source:MGI Symbol;Acc:MGI:1926211]
ENSMUSG00000021481	0.512857	0.000196739	0.953305	0.430749	Zfp346	protein_coding	zinc finger protein 346 [Source:MGI Symbol;Acc:MGI:1349417]
ENSMUSG00000002342	1.27955	0.000210344	3.2424	1.94875	Tmem161a	protein_coding	transmembrane protein 161A [Source:MGI Symbol;Acc:MGI:2384577]
ENSMUSG00000062797	0.937205	0.000210344	2.11685	1.1672	Hikeshi	protein_coding	heat shock protein nuclear import factor [Source:MGI Symbol;Acc:MGI:96738]
ENSMUSG00000032353	0.883637	0.000210344	1.25162	0.359084	Tmed3	protein_coding	transmembrane p24 trafficking protein 3 [Source:MGI Symbol;Acc:MGI:1913361]
ENSMUSG00000063428	0.877589	0.000210344	1.80898	0.921068	Ddo	protein_coding	D-aspartate oxidase [Source:MGI Symbol;Acc:MGI:1925528]
ENSMUSG00000004044	0.593412	0.000210344	2.34567	1.74169	Cavin1	protein_coding	caveolae associated 1 [Source:MGI Symbol;Acc:MGI:1277968]
ENSMUSG00000002957	0.565012	0.000210344	2.04755	1.47295	Ap2a2	protein_coding	adaptor-related protein complex 2, alpha 2 subunit [Source:MGI Symbol;Acc:MGI:101920]
ENSMUSG00000015755	0.348256	0.000210344	2.20953	1.85129	Tab2	protein_coding	TGF-beta activated kinase 1/MAP3K7 binding protein 2 [Source:MGI Symbol;Acc:MGI:1915902]
ENSMUSG00000042323	1.53177	0.000230309	4.40615	2.85465	Pbrm1	protein_coding	polybromo 1 [Source:MGI Symbol;Acc:MGI:1923998]
ENSMUSG00000027636	1.5278	0.000230309	3.41777	1.87375	Sla2	protein_coding	Src-like-adaptor 2 [Source:MGI Symbol;Acc:MGI:1925049]
ENSMUSG00000038506	1.11402	0.000230309	3.75579	2.62496	Dcun1d2	protein_coding	DCN1, defective in cullin neddylation 1, domain containing 2 (S. cerevisiae) [Source:MGI Symbol;Acc:MGI:2142792]
ENSMUSG00000019828	1.10556	0.000230309	2.26662	1.1493	Grm1	protein_coding	glutamate receptor, metabotropic 1 [Source:MGI Symbol;Acc:MGI:1351338]
ENSMUSG00000027536	0.970776	0.000230309	1.61236	0.631483	Chmp4c	protein_coding	charged multivesicular body protein 4C [Source:MGI Symbol;Acc:MGI:1913621]
ENSMUSG00000032309	0.563534	0.000230309	2.05667	1.48212	Fbxo22	protein_coding	F-box protein 22 [Source:MGI Symbol;Acc:MGI:1926014]
ENSMUSG00000091742	0.533345	0.000230309	2.21345	1.67037	Gm5093	protein_coding	predicted gene 5093 [Source:MGI Symbol;Acc:MGI:3644404]
ENSMUSG00000033423	0.362623	0.000230309	1.51725	1.14748	Eri3	protein_coding	exoribonuclease 3 [Source:MGI Symbol;Acc:MGI:2153887]
ENSMUSG00000002981	0.325715	0.000230309	1.20058	0.868392	Clptm1	protein_coding	cleft lip and palate associated transmembrane protein 1 [Source:MGI Symbol;Acc:MGI:1927155]
ENSMUSG00000027575	0.26207	0.000230309	1.26438	0.991503	Arfgap1	protein_coding	ADP-ribosylation factor GTPase activating protein 1 [Source:MGI Symbol;Acc:MGI:2183559]
ENSMUSG00000091695	0.17165	0.000230309	1.34302	1.16504	Gm17669	protein_coding	predicted gene, 17669 [Source:MGI Symbol;Acc:MGI:4937303]
ENSMUSG00000038518	1.11983	0.000234478	1.51546	0.382183	Jarid2	protein_coding	jumonji, AT rich interactive domain 2 [Source:MGI Symbol;Acc:MGI:104813]
ENSMUSG00000038080	0.852362	0.000234478	1.96965	1.10627	Kdm1b	protein_coding	lysine (K)-specific demethylase 1B [Source:MGI Symbol;Acc:MGI:2145261]
ENSMUSG00000025885	0.708334	0.000234478	1.68303	0.964079	Myo5b	protein_coding	myosin VB [Source:MGI Symbol;Acc:MGI:106598]
ENSMUSG00000041697	0.530489	0.000240493	3.86843	3.32042	Cox6a1	protein_coding	cytochrome c oxidase subunit VIa polypeptide 1 [Source:MGI Symbol;Acc:MGI:103099]
ENSMUSG00000048537	1.36737	0.000243047	3.70022	2.31627	Phldb1	protein_coding	pleckstrin homology like domain, family B, member 1 [Source:MGI Symbol;Acc:MGI:2143230]
ENSMUSG00000027637	1.21307	0.000264663	2.93167	1.70696	1110008F13Rik	protein_coding	RIKEN cDNA 1110008F13 gene [Source:MGI Symbol;Acc:MGI:1914638]
ENSMUSG00000032869	0.256359	0.0002751	1.22454	0.959411	Psmf1	protein_coding	proteasome (prosome, macropain) inhibitor subunit 1 [Source:MGI Symbol;Acc:MGI:1346072]
ENSMUSG00000039000	0.158019	0.0002751	1.6945	1.52827	Ube3c	protein_coding	ubiquitin protein ligase E3C [Source:MGI Symbol;Acc:MGI:2140998]
ENSMUSG00000057738	1.45168	0.000285362	2.65657	1.18984	Sptan1	protein_coding	spectrin alpha, non-erythrocytic 1 [Source:MGI Symbol;Acc:MGI:98386]
ENSMUSG00000029642	1.24323	0.000287065	3.67259	2.41403	Polr1d	protein_coding	polymerase (RNA) I polypeptide D [Source:MGI Symbol;Acc:MGI:108403]
ENSMUSG00000005846	0.739743	0.000287065	3.37081	2.61626	Rsl1d1	protein_coding	ribosomal L1 domain containing 1 [Source:MGI Symbol;Acc:MGI:1913659]
ENSMUSG00000070867	0.752441	0.000319908	3.97584	3.20529	Trabd2b	protein_coding	TraB domain containing 2B [Source:MGI Symbol;Acc:MGI:3650152]
ENSMUSG00000063524	1.00455	0.000327479	3.67837	2.65804	Eno1	protein_coding	enolase 1, alpha non-neuron [Source:MGI Symbol;Acc:MGI:95393]
ENSMUSG00000059040	0.783474	0.000335988	2.91143	2.11543	Eno1b	protein_coding	enolase 1B, retrotransposed [Source:MGI Symbol;Acc:MGI:3648653]
ENSMUSG00000011382	0.820216	0.00034092	1.84304	1.01369	Dhdh	protein_coding	dihydrodiol dehydrogenase (dimeric) [Source:MGI Symbol;Acc:MGI:1919005]
ENSMUSG00000038344	0.755437	0.00034092	1.07736	0.310012	Txlng	protein_coding	taxilin gamma [Source:MGI Symbol;Acc:MGI:3590652]
ENSMUSG00000028622	1.17495	0.000362993	3.11316	1.92593	Mrpl37	protein_coding	mitochondrial ribosomal protein L37 [Source:MGI Symbol;Acc:MGI:1926268]
ENSMUSG00000092607	0.861342	0.000366451	1.6875	0.817699	Scnm1	protein_coding	sodium channel modifier 1 [Source:MGI Symbol;Acc:MGI:1341284]
ENSMUSG00000078716	0.234019	0.000367811	1.40444	1.16042	Tmem8b	protein_coding	transmembrane protein 8B [Source:MGI Symbol;Acc:MGI:2441680]
ENSMUSG00000057342	0.396768	0.000371929	1.78444	1.3781	Sphk2	protein_coding	sphingosine kinase 2 [Source:MGI Symbol;Acc:MGI:1861380]
ENSMUSG00000025499	1.69848	0.000374001	4.38862	2.67289	Hras	protein_coding	Harvey rat sarcoma virus oncogene [Source:MGI Symbol;Acc:MGI:96224]
ENSMUSG00000037822	1.25633	0.000374001	3.18546	1.91536	Smim14	protein_coding	small integral membrane protein 14 [Source:MGI Symbol;Acc:MGI:1915802]
ENSMUSG00000037622	1.09023	0.000374001	1.87841	0.779717	Wdtc1	protein_coding	WD and tetratricopeptide repeats 1 [Source:MGI Symbol;Acc:MGI:2685541]
ENSMUSG00000024068	0.914078	0.000374001	2.0597	1.13394	Spast	protein_coding	spastin [Source:MGI Symbol;Acc:MGI:1858896]
ENSMUSG00000024074	0.829238	0.000374001	1.73898	0.90094	Crim1	protein_coding	cysteine rich transmembrane BMP regulator 1 (chordin like) [Source:MGI Symbol;Acc:MGI:1354756]
ENSMUSG00000035936	0.729876	0.000374001	2.12876	1.38909	Aldh5a1	protein_coding	aldhehyde dehydrogenase family 5, subfamily A1 [Source:MGI Symbol;Acc:MGI:2441982]
ENSMUSG00000099913	0.660666	0.000374001	2.67924	2.00729	Gm28551	protein_coding	predicted gene 28551 [Source:MGI Symbol;Acc:MGI:5579257]
ENSMUSG00000002763	0.61222	0.000374001	1.61369	0.993071	Pex6	protein_coding	peroxisomal biogenesis factor 6 [Source:MGI Symbol;Acc:MGI:2385054]
ENSMUSG00000019849	0.445299	0.000374001	1.80895	1.35482	Prep	protein_coding	prolyl endopeptidase [Source:MGI Symbol;Acc:MGI:1270863]
ENSMUSG00000029701	0.316624	0.000375528	0.986305	0.660962	Rbm28	protein_coding	RNA binding motif protein 28 [Source:MGI Symbol;Acc:MGI:2655711]
ENSMUSG00000029723	1.21738	0.000398858	4.26814	3.03218	Tsc22d4	protein_coding	TSC22 domain family, member 4 [Source:MGI Symbol;Acc:MGI:1926079]
ENSMUSG00000015087	0.562159	0.000398858	2.73403	2.16056	Rabl6	protein_coding	RAB, member RAS oncogene family-like 6 [Source:MGI Symbol;Acc:MGI:2442633]
ENSMUSG00000036282	1.02408	0.000446687	1.70828	0.674578	Naa30	protein_coding	N(alpha)-acetyltransferase 30, NatC catalytic subunit [Source:MGI Symbol;Acc:MGI:1922259]
ENSMUSG00000028420	0.455087	0.00046425	1.71215	1.24759	Tmem38b	protein_coding	transmembrane protein 38B [Source:MGI Symbol;Acc:MGI:1098718]
ENSMUSG00000028447	1.17565	0.000464491	4.30319	3.10884	Dctn3	protein_coding	dynactin 3 [Source:MGI Symbol;Acc:MGI:1859251]
ENSMUSG00000036052	1.1654	0.000479843	2.69759	1.5192	Dnajb5	protein_coding	DnaJ heat shock protein family (Hsp40) member B5 [Source:MGI Symbol;Acc:MGI:1930018]
ENSMUSG00000040888	0.812789	0.000479843	1.96795	1.14463	Gfer	protein_coding	growth factor, augmenter of liver regeneration [Source:MGI Symbol;Acc:MGI:107757]
ENSMUSG00000027185	0.626001	0.000479843	0.866061	0.230178	Nat10	protein_coding	N-acetyltransferase 10 [Source:MGI Symbol;Acc:MGI:2138939]
ENSMUSG00000019920	1.4646	0.000490542	3.77712	2.29821	Lims1	protein_coding	LIM and senescent cell antigen-like domains 1 [Source:MGI Symbol;Acc:MGI:1195263]
ENSMUSG00000001687	0.893521	0.000490542	3.45836	2.55024	Ubl3	protein_coding	ubiquitin-like 3 [Source:MGI Symbol;Acc:MGI:1344373]
ENSMUSG00000024431	1.66145	0.000493551	4.44103	2.76187	Nr3c1	protein_coding	nuclear receptor subfamily 3, group C, member 1 [Source:MGI Symbol;Acc:MGI:95824]
ENSMUSG00000020923	1.68188	0.000507278	3.32676	1.62925	Ubtf	protein_coding	upstream binding transcription factor, RNA polymerase I [Source:MGI Symbol;Acc:MGI:98512]
ENSMUSG00000017765	0.771092	0.000507278	1.81898	1.03683	Slc12a4	protein_coding	solute carrier family 12, member 4 [Source:MGI Symbol;Acc:MGI:1309465]
ENSMUSG00000069539	-0.00429521	0.0005078	0.618553	0.616631	Scyl2	protein_coding	SCY1-like 2 (S. cerevisiae) [Source:MGI Symbol;Acc:MGI:1289172]
ENSMUSG00000037531	1.03776	0.00053014	2.53196	1.48338	Mrpl47	protein_coding	mitochondrial ribosomal protein L47 [Source:MGI Symbol;Acc:MGI:1921850]
ENSMUSG00000093752	0.654822	0.00053014	3.44755	2.7795	Gm20716	protein_coding	predicted gene 20716 [Source:MGI Symbol;Acc:MGI:5313163]
ENSMUSG00000027433	0.600646	0.00053014	1.8514	1.24096	Xrn2	protein_coding	5'-3' exoribonuclease 2 [Source:MGI Symbol;Acc:MGI:894687]
ENSMUSG00000040466	0.104728	0.00053014	1.14767	1.03371	Blvrb	protein_coding	biliverdin reductase B (flavin reductase (NADPH)) [Source:MGI Symbol;Acc:MGI:2385271]
ENSMUSG00000050552	0.725632	0.000534936	2.11899	1.38447	Lamtor4	protein_coding	late endosomal/lysosomal adaptor, MAPK and MTOR activator 4 [Source:MGI Symbol;Acc:MGI:1913346]
ENSMUSG00000032239	1.32462	0.000561766	3.61991	2.28027	Rp9	protein_coding	retinitis pigmentosa 9 (human) [Source:MGI Symbol;Acc:MGI:2157166]
ENSMUSG00000058655	1.04916	0.000561766	3.87732	2.81148	Eif4b	protein_coding	eukaryotic translation initiation factor 4B [Source:MGI Symbol;Acc:MGI:95304]
ENSMUSG00000024847	0.716303	0.000561766	1.05587	0.331612	Aip	protein_coding	aryl-hydrocarbon receptor-interacting protein [Source:MGI Symbol;Acc:MGI:109622]
ENSMUSG00000039176	0.642128	0.000561766	1.70481	1.05396	Polg	protein_coding	polymerase (DNA directed), gamma [Source:MGI Symbol;Acc:MGI:1196389]
ENSMUSG00000034807	0.523431	0.000561766	1.38432	0.851877	Colgalt1	protein_coding	collagen beta(1-O)galactosyltransferase 1 [Source:MGI Symbol;Acc:MGI:1924348]
ENSMUSG00000024217	0.897387	0.000572168	1.71117	0.804472	Snrpc	protein_coding	U1 small nuclear ribonucleoprotein C [Source:MGI Symbol;Acc:MGI:109489]
ENSMUSG00000019814	0.63271	0.000572168	1.11853	0.474672	Ltv1	protein_coding	LTV1 ribosome biogenesis factor [Source:MGI Symbol;Acc:MGI:2447810]
ENSMUSG00000022420	0.324124	0.000572168	1.04873	0.715202	Dnal4	protein_coding	dynein, axonemal, light chain 4 [Source:MGI Symbol;Acc:MGI:1859217]
ENSMUSG00000021134	1.36363	0.000595346	5.69736	4.30736	Srsf5	protein_coding	serine/arginine-rich splicing factor 5 [Source:MGI Symbol;Acc:MGI:98287]
ENSMUSG00000029621	0.438049	0.000595346	1.31682	0.871046	Arpc1a	protein_coding	actin related protein 2/3 complex, subunit 1A [Source:MGI Symbol;Acc:MGI:1928896]
ENSMUSG00000025612	0.765371	0.000598449	1.21029	0.435575	Bach1	protein_coding	BTB and CNC homology 1, basic leucine zipper transcription factor 1 [Source:MGI Symbol;Acc:MGI:894680]
ENSMUSG00000042447	0.316113	0.000598969	1.22646	0.901915	Mios	protein_coding	missing oocyte, meiosis regulator, homolog (Drosophila) [Source:MGI Symbol;Acc:MGI:2182066]
ENSMUSG00000097487	0.247252	0.000598969	2.46753	2.21104	Ptges3l	protein_coding	prostaglandin E synthase 3 like [Source:MGI Symbol;Acc:MGI:1916146]
ENSMUSG00000027465	0.153782	0.000598969	1.18385	1.02309	Tbc1d20	protein_coding	TBC1 domain family, member 20 [Source:MGI Symbol;Acc:MGI:1914481]
ENSMUSG00000026502	-0.0417634	0.000598969	1.20895	1.24391	Desi2	protein_coding	desumoylating isopeptidase 2 [Source:MGI Symbol;Acc:MGI:1926075]
ENSMUSG00000022100	0.76471	0.000602762	1.76517	0.99083	Xpo7	protein_coding	exportin 7 [Source:MGI Symbol;Acc:MGI:1929705]
ENSMUSG00000035790	1.02178	0.000610673	1.71124	0.676881	Cep19	protein_coding	centrosomal protein 19 [Source:MGI Symbol;Acc:MGI:1914244]
ENSMUSG00000034042	1.15237	0.000612049	2.60238	1.43915	Gpbp1l1	protein_coding	GC-rich promoter binding protein 1-like 1 [Source:MGI Symbol;Acc:MGI:1924360]
ENSMUSG00000021111	1.65284	0.00062457	3.80571	2.13711	Papola	protein_coding	poly (A) polymerase alpha [Source:MGI Symbol;Acc:MGI:109301]
ENSMUSG00000026924	0.78661	0.00062457	1.35354	0.553733	Sec16a	protein_coding	SEC16 homolog A, endoplasmic reticulum export factor [Source:MGI Symbol;Acc:MGI:2139207]
ENSMUSG00000018379	0.428098	0.00062457	2.0481	1.60996	Srsf1	protein_coding	serine/arginine-rich splicing factor 1 [Source:MGI Symbol;Acc:MGI:98283]
ENSMUSG00000034075	0.968129	0.000626475	2.53823	1.55907	Zdhhc5	protein_coding	zinc finger, DHHC domain containing 5 [Source:MGI Symbol;Acc:MGI:1923573]
ENSMUSG00000075595	0.499519	0.000626475	1.6651	1.15522	Zfp652	protein_coding	zinc finger protein 652 [Source:MGI Symbol;Acc:MGI:2442221]
ENSMUSG00000068267	0.495821	0.000626475	3.65403	3.14254	Cenpb	protein_coding	centromere protein B [Source:MGI Symbol;Acc:MGI:88376]
ENSMUSG00000039911	0.353733	0.000626475	0.905656	0.544013	Spsb1	protein_coding	splA/ryanodine receptor domain and SOCS box containing 1 [Source:MGI Symbol;Acc:MGI:1921896]
ENSMUSG00000038526	1.00456	0.000635514	4.29417	3.26946	Car14	protein_coding	carbonic anhydrase 14 [Source:MGI Symbol;Acc:MGI:1344341]
ENSMUSG00000031865	1.44221	0.000636549	4.87945	3.41745	Dctn1	protein_coding	dynactin 1 [Source:MGI Symbol;Acc:MGI:107745]
ENSMUSG00000025134	0.255698	0.000652884	1.222	0.95945	Alyref	protein_coding	Aly/REF export factor [Source:MGI Symbol;Acc:MGI:1341044]
ENSMUSG00000059518	0.921896	0.000652887	2.99082	2.05676	Znhit1	protein_coding	zinc finger, HIT domain containing 1 [Source:MGI Symbol;Acc:MGI:1917353]
ENSMUSG00000028184	0.650289	0.000652887	1.41299	0.749099	Adgrl2	protein_coding	adhesion G protein-coupled receptor L2 [Source:MGI Symbol;Acc:MGI:2139714]
ENSMUSG00000014767	0.300911	0.000652887	0.934552	0.624094	Tbp	protein_coding	TATA box binding protein [Source:MGI Symbol;Acc:MGI:101838]
ENSMUSG00000020277	0.742071	0.000663797	1.8609	1.11086	Pfkl	protein_coding	phosphofructokinase, liver, B-type [Source:MGI Symbol;Acc:MGI:97547]
ENSMUSG00000015749	1.14588	0.000679349	3.63042	2.46963	Anp32e	protein_coding	acidic (leucine-rich) nuclear phosphoprotein 32 family, member E [Source:MGI Symbol;Acc:MGI:1913721]
ENSMUSG00000028741	0.476389	0.000679349	1.70807	1.22287	Mrto4	protein_coding	mRNA turnover 4, ribosome maturation factor [Source:MGI Symbol;Acc:MGI:1917152]
ENSMUSG00000027357	0.423734	0.000679349	1.9511	1.51787	Crls1	protein_coding	cardiolipin synthase 1 [Source:MGI Symbol;Acc:MGI:1913836]
ENSMUSG00000029191	0.40011	0.000679349	3.1834	2.77134	Rfc1	protein_coding	replication factor C (activator 1) 1 [Source:MGI Symbol;Acc:MGI:97891]
ENSMUSG00000021377	1.17666	0.00068043	2.87584	1.6875	Dek	protein_coding	DEK oncogene (DNA binding) [Source:MGI Symbol;Acc:MGI:1926209]
ENSMUSG00000055723	0.952368	0.000688807	3.56177	2.59458	Rras2	protein_coding	related RAS viral (r-ras) oncogene 2 [Source:MGI Symbol;Acc:MGI:1914172]
ENSMUSG00000022962	0.688638	0.000688807	1.51062	0.813112	Gart	protein_coding	phosphoribosylglycinamide formyltransferase [Source:MGI Symbol;Acc:MGI:95654]
ENSMUSG00000020611	0.606477	0.000688807	1.10799	0.492931	Gna13	protein_coding	guanine nucleotide binding protein, alpha 13 [Source:MGI Symbol;Acc:MGI:95768]
ENSMUSG00000004667	1.14489	0.00069292	3.8961	2.73571	Polr2e	protein_coding	polymerase (RNA) II (DNA directed) polypeptide E [Source:MGI Symbol;Acc:MGI:1913670]
ENSMUSG00000032126	0.754293	0.00069292	1.7822	1.01781	Hmbs	protein_coding	hydroxymethylbilane synthase [Source:MGI Symbol;Acc:MGI:96112]
ENSMUSG00000013973	0.996824	0.000699252	2.16385	1.15657	Dedd	protein_coding	death effector domain-containing [Source:MGI Symbol;Acc:MGI:1333874]
ENSMUSG00000024588	0.907368	0.000699252	4.04217	3.11537	Fech	protein_coding	ferrochelatase [Source:MGI Symbol;Acc:MGI:95513]
ENSMUSG00000029014	0.903981	0.000699252	3.33435	2.41625	Dnajc2	protein_coding	DnaJ heat shock protein family (Hsp40) member C2 [Source:MGI Symbol;Acc:MGI:99470]
ENSMUSG00000037519	0.755178	0.000699252	2.2806	1.51547	Ppfia1	protein_coding	protein tyrosine phosphatase, receptor type, f polypeptide (PTPRF), interacting protein (liprin), alpha 1 [Source:MGI Symbol;Acc:MGI:1924750]
ENSMUSG00000032615	0.709645	0.000699252	1.40265	0.685346	Nt5m	protein_coding	5',3'-nucleotidase, mitochondrial [Source:MGI Symbol;Acc:MGI:1917127]
ENSMUSG00000034485	0.612659	0.000699252	2.75758	2.1336	Uaca	protein_coding	uveal autoantigen with coiled-coil domains and ankyrin repeats [Source:MGI Symbol;Acc:MGI:1919815]
ENSMUSG00000038619	0.561135	0.000699252	2.85592	2.28344	Ensa	protein_coding	endosulfine alpha [Source:MGI Symbol;Acc:MGI:1891189]
ENSMUSG00000033068	0.328982	0.00070283	0.472974	0.136314	Entpd6	protein_coding	ectonucleoside triphosphate diphosphohydrolase 6 [Source:MGI Symbol;Acc:MGI:1202295]
ENSMUSG00000042298	1.11603	0.000704725	3.15087	2.02199	Ttc19	protein_coding	tetratricopeptide repeat domain 19 [Source:MGI Symbol;Acc:MGI:1920045]
ENSMUSG00000066036	1.08406	0.000704725	3.68028	2.5815	Ubr4	protein_coding	ubiquitin protein ligase E3 component n-recognin 4 [Source:MGI Symbol;Acc:MGI:1916366]
ENSMUSG00000051989	1.06742	0.000704725	4.85567	3.76421	Smim11	protein_coding	small integral membrane protein 11 [Source:MGI Symbol;Acc:MGI:1916186]
ENSMUSG00000030008	0.354664	0.000704725	0.595605	0.229562	Pradc1	protein_coding	protease-associated domain containing 1 [Source:MGI Symbol;Acc:MGI:1920577]
ENSMUSG00000010048	0.323532	0.000704725	1.79877	1.46773	Ifrd2	protein_coding	interferon-related developmental regulator 2 [Source:MGI Symbol;Acc:MGI:1316708]
ENSMUSG00000032177	0.309522	0.000704725	2.15288	1.83469	Pde4a	protein_coding	phosphodiesterase 4A, cAMP specific [Source:MGI Symbol;Acc:MGI:99558]
ENSMUSG00000028136	0.073761	0.000704725	0.94242	0.861828	Snx27	protein_coding	sorting nexin family member 27 [Source:MGI Symbol;Acc:MGI:1923992]
ENSMUSG00000063406	0.632135	0.000706433	2.15382	1.51106	Tmed5	protein_coding	transmembrane p24 trafficking protein 5 [Source:MGI Symbol;Acc:MGI:1921586]
ENSMUSG00000003346	0.47636	0.000732783	1.39203	0.905086	Abhd17a	protein_coding	abhydrolase domain containing 17A [Source:MGI Symbol;Acc:MGI:106388]
ENSMUSG00000027573	0.717699	0.00074015	2.21543	1.48714	Gid8	protein_coding	GID complex subunit 8 [Source:MGI Symbol;Acc:MGI:1923675]
ENSMUSG00000074582	0.826554	0.000741752	1.61016	0.774405	Arfgef2	protein_coding	ADP-ribosylation factor guanine nucleotide-exchange factor 2 (brefeldin A-inhibited) [Source:MGI Symbol;Acc:MGI:2139354]
ENSMUSG00000023927	1.35456	0.00075026	2.61378	1.24785	Satb1	protein_coding	special AT-rich sequence binding protein 1 [Source:MGI Symbol;Acc:MGI:105084]
ENSMUSG00000048546	0.715131	0.00075026	2.01452	1.29021	Tob2	protein_coding	transducer of ERBB2, 2 [Source:MGI Symbol;Acc:MGI:1888525]
ENSMUSG00000073755	0.682491	0.00075026	1.61103	0.91834	5730409E04Rik	protein_coding	RIKEN cDNA 5730409E04Rik gene [Source:MGI Symbol;Acc:MGI:3609248]
ENSMUSG00000029177	0.571176	0.00075026	1.83102	1.25076	Cenpa	protein_coding	centromere protein A [Source:MGI Symbol;Acc:MGI:88375]
ENSMUSG00000005699	0.463304	0.00075026	0.614467	0.129009	Pard6a	protein_coding	par-6 family cell polarity regulator alpha [Source:MGI Symbol;Acc:MGI:1927223]
ENSMUSG00000017188	0.44581	0.00075026	5.06222	4.58061	Coa3	protein_coding	cytochrome C oxidase assembly factor 3 [Source:MGI Symbol;Acc:MGI:1098757]
ENSMUSG00000039041	0.247784	0.00075026	2.96623	2.70645	Adrm1	protein_coding	adhesion regulating molecule 1 [Source:MGI Symbol;Acc:MGI:1929289]
ENSMUSG00000063802	0.600241	0.000753993	1.00612	0.397402	Hspbp1	protein_coding	HSPA (heat shock 70kDa) binding protein, cytoplasmic cochaperone 1 [Source:MGI Symbol;Acc:MGI:1913495]
ENSMUSG00000004788	0.455527	0.000753993	1.2636	0.80003	Eif2b2	protein_coding	eukaryotic translation initiation factor 2B, subunit 2 beta [Source:MGI Symbol;Acc:MGI:2145118]
ENSMUSG00000031232	1.27379	0.000767992	2.97674	1.69063	Magt1	protein_coding	magnesium transporter 1 [Source:MGI Symbol;Acc:MGI:1914325]
ENSMUSG00000024150	0.982405	0.000767992	3.17649	2.181	Mcfd2	protein_coding	multiple coagulation factor deficiency 2 [Source:MGI Symbol;Acc:MGI:2183439]
ENSMUSG00000038807	0.913439	0.000767992	2.15122	1.22871	Rap1gap2	protein_coding	RAP1 GTPase activating protein 2 [Source:MGI Symbol;Acc:MGI:3028623]
ENSMUSG00000019944	0.612122	0.000767992	2.4437	1.82026	Rhobtb1	protein_coding	Rho-related BTB domain containing 1 [Source:MGI Symbol;Acc:MGI:1916538]
ENSMUSG00000067455	0.434326	0.000767992	1.33927	0.895506	Hist1h4j	protein_coding	histone cluster 1, H4j [Source:MGI Symbol;Acc:MGI:2448436]
ENSMUSG00000057969	0.0822769	0.000767992	1.201	1.11078	Sema3b	protein_coding	sema domain, immunoglobulin domain (Ig), short basic domain, secreted, (semaphorin) 3B [Source:MGI Symbol;Acc:MGI:107561]
ENSMUSG00000013160	0.442912	0.000797475	1.63206	1.18091	Atp6v0d1	protein_coding	ATPase, H+ transporting, lysosomal V0 subunit D1 [Source:MGI Symbol;Acc:MGI:1201778]
ENSMUSG00000067336	0.832284	0.000800294	2.74098	1.89755	Bmpr2	protein_coding	bone morphogenetic protein receptor, type II (serine/threonine kinase) [Source:MGI Symbol;Acc:MGI:1095407]
ENSMUSG00000021597	0.748433	0.000800294	2.19242	1.43425	Slf1	protein_coding	SMC5-SMC6 complex localization factor 1 [Source:MGI Symbol;Acc:MGI:2145448]
ENSMUSG00000029623	0.503077	0.000800294	2.86223	2.34802	Pdap1	protein_coding	PDGFA associated protein 1 [Source:MGI Symbol;Acc:MGI:2448536]
ENSMUSG00000020059	0.342554	0.000800294	4.94465	4.56774	Sycp3	protein_coding	synaptonemal complex protein 3 [Source:MGI Symbol;Acc:MGI:109542]
ENSMUSG00000032026	-0.000719044	0.000800294	2.59463	2.58791	Rexo2	protein_coding	RNA exonuclease 2 [Source:MGI Symbol;Acc:MGI:1888981]
ENSMUSG00000041733	0.448272	0.000803731	3.52935	3.06693	Coq5	protein_coding	coenzyme Q5 methyltransferase [Source:MGI Symbol;Acc:MGI:1098643]
ENSMUSG00000005656	0.119775	0.000803731	1.43101	1.30387	Snx6	protein_coding	sorting nexin 6 [Source:MGI Symbol;Acc:MGI:1919433]
ENSMUSG00000005803	0.52139	0.000812059	2.01919	1.48773	Sqor	protein_coding	sulfide quinone oxidoreductase [Source:MGI Symbol;Acc:MGI:1929899]
ENSMUSG00000070426	0.61609	0.000821345	1.32473	0.698226	Rnf121	protein_coding	ring finger protein 121 [Source:MGI Symbol;Acc:MGI:1922462]
ENSMUSG00000014592	1.71128	0.00082614	5.60012	3.86841	Camta1	protein_coding	calmodulin binding transcription activator 1 [Source:MGI Symbol;Acc:MGI:2140230]
ENSMUSG00000003402	1.16394	0.00082614	2.00423	0.831552	Prkcsh	protein_coding	protein kinase C substrate 80K-H [Source:MGI Symbol;Acc:MGI:107877]
ENSMUSG00000005299	0.886537	0.00082614	4.75371	3.84218	Letm1	protein_coding	leucine zipper-EF-hand containing transmembrane protein 1 [Source:MGI Symbol;Acc:MGI:1932557]
ENSMUSG00000029338	0.755921	0.00082614	2.48043	1.71444	Antxr2	protein_coding	anthrax toxin receptor 2 [Source:MGI Symbol;Acc:MGI:1919164]
ENSMUSG00000032582	0.553917	0.00082614	1.29166	0.726441	Rbm6	protein_coding	RNA binding motif protein 6 [Source:MGI Symbol;Acc:MGI:1338037]
ENSMUSG00000078240	0.2743	0.00082614	0.892517	0.613242	Gm3550	protein_coding	predicted gene 3550 [Source:MGI Symbol;Acc:MGI:3781727]
ENSMUSG00000020124	1.35983	0.000826748	4.06222	2.68731	Usp15	protein_coding	ubiquitin specific peptidase 15 [Source:MGI Symbol;Acc:MGI:101857]
ENSMUSG00000030795	0.00487084	0.000826748	2.94812	2.93361	Fus	protein_coding	fused in sarcoma [Source:MGI Symbol;Acc:MGI:1353633]
ENSMUSG00000019373	0.530943	0.000858135	2.95431	2.41221	Cops3	protein_coding	COP9 signalosome subunit 3 [Source:MGI Symbol;Acc:MGI:1349409]
ENSMUSG00000035762	0.292123	0.000868975	1.03921	0.73826	Tmem161b	protein_coding	transmembrane protein 161B [Source:MGI Symbol;Acc:MGI:1919995]
ENSMUSG00000042895	0.872088	0.00087882	2.85519	1.97176	Abra	protein_coding	actin-binding Rho activating protein [Source:MGI Symbol;Acc:MGI:2444891]
ENSMUSG00000091264	0.639487	0.000894755	1.99694	1.34887	Smim13	protein_coding	small integral membrane protein 13 [Source:MGI Symbol;Acc:MGI:2652854]
ENSMUSG00000028035	1.57458	0.000897184	4.96714	3.37812	Dnajb4	protein_coding	DnaJ heat shock protein family (Hsp40) member B4 [Source:MGI Symbol;Acc:MGI:1914285]
ENSMUSG00000028837	1.09493	0.000897184	3.57656	2.46791	Psmb2	protein_coding	proteasome (prosome, macropain) subunit, beta type 2 [Source:MGI Symbol;Acc:MGI:1347045]
ENSMUSG00000027519	1.03651	0.000897184	2.68036	1.63359	Rab22a	protein_coding	RAB22A, member RAS oncogene family [Source:MGI Symbol;Acc:MGI:105072]
ENSMUSG00000029580	0.869141	0.000897184	3.70425	2.81939	Actb	protein_coding	actin, beta [Source:MGI Symbol;Acc:MGI:87904]
ENSMUSG00000006418	0.754965	0.000897184	2.6029	1.83664	Rnf114	protein_coding	ring finger protein 114 [Source:MGI Symbol;Acc:MGI:1933159]
ENSMUSG00000041921	0.659942	0.000897184	1.25509	0.58687	Metap1d	protein_coding	methionyl aminopeptidase type 1D (mitochondrial) [Source:MGI Symbol;Acc:MGI:1913809]
ENSMUSG00000026558	0.505074	0.000897184	1.35967	0.846194	Uck2	protein_coding	uridine-cytidine kinase 2 [Source:MGI Symbol;Acc:MGI:1931744]
ENSMUSG00000036764	0.173839	0.000897184	0.487241	0.304187	Dnajc12	protein_coding	DnaJ heat shock protein family (Hsp40) member C12 [Source:MGI Symbol;Acc:MGI:1353428]
ENSMUSG00000041341	0.39821	0.000919994	0.746674	0.340404	Atg2b	protein_coding	autophagy related 2B [Source:MGI Symbol;Acc:MGI:1923809]
ENSMUSG00000002108	0.997299	0.000952329	1.39356	0.386286	Nr1h3	protein_coding	nuclear receptor subfamily 1, group H, member 3 [Source:MGI Symbol;Acc:MGI:1352462]
ENSMUSG00000022914	1.2618	0.000960339	3.48109	2.20569	Brwd1	protein_coding	bromodomain and WD repeat domain containing 1 [Source:MGI Symbol;Acc:MGI:1890651]
ENSMUSG00000018501	1.25574	0.000960339	5.33961	4.06244	Ncor1	protein_coding	nuclear receptor co-repressor 1 [Source:MGI Symbol;Acc:MGI:1349717]
ENSMUSG00000033610	1.14851	0.000960339	3.32015	2.15879	Pank1	protein_coding	pantothenate kinase 1 [Source:MGI Symbol;Acc:MGI:1922985]
ENSMUSG00000031370	0.53793	0.000960339	0.903607	0.355982	Zrsr2	protein_coding	zinc finger (CCCH type), RNA binding motif and serine/arginine rich 2 [Source:MGI Symbol;Acc:MGI:103287]
ENSMUSG00000001630	0.456293	0.000960339	0.941649	0.474091	Stk38l	protein_coding	serine/threonine kinase 38 like [Source:MGI Symbol;Acc:MGI:1922250]
ENSMUSG00000053113	0.390749	0.000960339	1.45271	1.055	Socs3	protein_coding	suppressor of cytokine signaling 3 [Source:MGI Symbol;Acc:MGI:1201791]
ENSMUSG00000030629	1.26746	0.000963627	4.90626	3.61879	Zfand6	protein_coding	zinc finger, AN1-type domain 6 [Source:MGI Symbol;Acc:MGI:1929510]
ENSMUSG00000053110	0.779762	0.000963627	1.74561	0.956038	Yap1	protein_coding	yes-associated protein 1 [Source:MGI Symbol;Acc:MGI:103262]
ENSMUSG00000036376	0.567996	0.000963627	0.757854	0.177487	Abt1	protein_coding	activator of basal transcription 1 [Source:MGI Symbol;Acc:MGI:1353636]
ENSMUSG00000078970	0.479299	0.000963627	0.86757	0.378501	Wdr92	protein_coding	WD repeat domain 92 [Source:MGI Symbol;Acc:MGI:2144224]
ENSMUSG00000031557	0.475397	0.000963627	1.4882	1.00205	Plekha2	protein_coding	pleckstrin homology domain-containing, family A (phosphoinositide binding specific) member 2 [Source:MGI Symbol;Acc:MGI:1928144]
ENSMUSG00000022742	1.03709	0.000998847	2.28225	1.23679	Cpox	protein_coding	coproporphyrinogen oxidase [Source:MGI Symbol;Acc:MGI:104841]
ENSMUSG00000031533	0.94928	0.00100415	2.33191	1.37268	Mrps31	protein_coding	mitochondrial ribosomal protein S31 [Source:MGI Symbol;Acc:MGI:1913153]
ENSMUSG00000022992	0.758425	0.00100415	1.91648	1.14927	Kansl2	protein_coding	KAT8 regulatory NSL complex subunit 2 [Source:MGI Symbol;Acc:MGI:1916862]
ENSMUSG00000027130	0.760885	0.00100775	3.1254	2.35241	Slc12a6	protein_coding	solute carrier family 12, member 6 [Source:MGI Symbol;Acc:MGI:2135960]
ENSMUSG00000090841	1.4524	0.00102198	4.54501	3.07592	Myl6	protein_coding	myosin, light polypeptide 6, alkali, smooth muscle and non-muscle [Source:MGI Symbol;Acc:MGI:109318]
ENSMUSG00000030733	0.989813	0.00102198	2.74355	1.74105	Sh2b1	protein_coding	SH2B adaptor protein 1 [Source:MGI Symbol;Acc:MGI:1201407]
ENSMUSG00000002797	0.51332	0.00102198	1.75434	1.23259	Ggct	protein_coding	gamma-glutamyl cyclotransferase [Source:MGI Symbol;Acc:MGI:95700]
ENSMUSG00000027405	0.409042	0.00102198	1.03744	0.620032	Nop56	protein_coding	NOP56 ribonucleoprotein [Source:MGI Symbol;Acc:MGI:1914384]
ENSMUSG00000007670	0.375536	0.00102198	0.581715	0.200781	Khsrp	protein_coding	KH-type splicing regulatory protein [Source:MGI Symbol;Acc:MGI:1336214]
ENSMUSG00000021666	1.54898	0.00104037	3.52442	1.96413	Gfm2	protein_coding	G elongation factor, mitochondrial 2 [Source:MGI Symbol;Acc:MGI:2444783]
ENSMUSG00000031667	0.569983	0.00104037	4.60011	4.01305	Aktip	protein_coding	thymoma viral proto-oncogene 1 interacting protein [Source:MGI Symbol;Acc:MGI:3693832]
ENSMUSG00000038485	0.525586	0.00104295	0.972438	0.438252	Socs7	protein_coding	suppressor of cytokine signaling 7 [Source:MGI Symbol;Acc:MGI:2651588]
ENSMUSG00000011832	0.474496	0.00104295	0.817645	0.33281	Evi5l	protein_coding	ecotropic viral integration site 5 like [Source:MGI Symbol;Acc:MGI:2442167]
ENSMUSG00000040414	0.423495	0.00107018	1.19759	0.766225	Slc25a28	protein_coding	solute carrier family 25, member 28 [Source:MGI Symbol;Acc:MGI:2180509]
ENSMUSG00000039680	0.277033	0.00107018	1.92688	1.64228	Mrps6	protein_coding	mitochondrial ribosomal protein S6 [Source:MGI Symbol;Acc:MGI:2153111]
ENSMUSG00000024914	0.0331633	0.00107132	5.3468	5.29373	Drap1	protein_coding	Dr1 associated protein 1 (negative cofactor 2 alpha) [Source:MGI Symbol;Acc:MGI:1913806]
ENSMUSG00000041164	1.2218	0.00107565	2.17594	0.942783	Zmiz2	protein_coding	zinc finger, MIZ-type containing 2 [Source:MGI Symbol;Acc:MGI:106374]
ENSMUSG00000042115	0.825506	0.00107565	2.38458	1.5492	Klhdc8a	protein_coding	kelch domain containing 8A [Source:MGI Symbol;Acc:MGI:2442630]
ENSMUSG00000028138	0.798868	0.00107565	2.96755	2.15712	Adh5	protein_coding	alcohol dehydrogenase 5 (class III), chi polypeptide [Source:MGI Symbol;Acc:MGI:87929]
ENSMUSG00000062753	0.312092	0.00107565	1.50842	1.18986	AI413582	protein_coding	expressed sequence AI413582 [Source:MGI Symbol;Acc:MGI:2146839]
ENSMUSG00000036983	0.214679	0.00107565	0.481075	0.254058	Tfb1m	protein_coding	transcription factor B1, mitochondrial [Source:MGI Symbol;Acc:MGI:2146851]
ENSMUSG00000035765	0.910573	0.00110719	3.16034	2.23769	Dym	protein_coding	dymeclin [Source:MGI Symbol;Acc:MGI:1918480]
ENSMUSG00000022280	0.22903	0.00110793	0.352324	0.107278	Rnf19a	protein_coding	ring finger protein 19A [Source:MGI Symbol;Acc:MGI:1353623]
ENSMUSG00000032845	0.393145	0.00110962	2.59471	2.19202	Alpk2	protein_coding	alpha-kinase 2 [Source:MGI Symbol;Acc:MGI:2449492]
ENSMUSG00000026341	1.41497	0.00111643	3.2596	1.83262	Actr3	protein_coding	ARP3 actin-related protein 3 [Source:MGI Symbol;Acc:MGI:1921367]
ENSMUSG00000022571	0.356116	0.00111711	0.600619	0.235507	Pycrl	protein_coding	pyrroline-5-carboxylate reductase-like [Source:MGI Symbol;Acc:MGI:1913444]
ENSMUSG00000028822	0.684486	0.00112341	1.98951	1.29641	Tmem50a	protein_coding	transmembrane protein 50A [Source:MGI Symbol;Acc:MGI:1919067]
ENSMUSG00000027546	0.577289	0.00112341	2.17049	1.58239	Atp9a	protein_coding	ATPase, class II, type 9A [Source:MGI Symbol;Acc:MGI:1330826]
ENSMUSG00000024218	0.971143	0.0011441	2.19978	1.21822	Taf11	protein_coding	TATA-box binding protein associated factor 11 [Source:MGI Symbol;Acc:MGI:1916026]
ENSMUSG00000028743	0.809027	0.00114562	2.81008	1.99028	Akr7a5	protein_coding	aldo-keto reductase family 7, member A5 (aflatoxin aldehyde reductase) [Source:MGI Symbol;Acc:MGI:107796]
ENSMUSG00000025757	0.749111	0.00114562	3.13059	2.36938	Hspa4l	protein_coding	heat shock protein 4 like [Source:MGI Symbol;Acc:MGI:107422]
ENSMUSG00000035569	1.18617	0.00114616	3.97123	2.76967	Ankrd11	protein_coding	ankyrin repeat domain 11 [Source:MGI Symbol;Acc:MGI:1924337]
ENSMUSG00000024654	1.12744	0.00114616	2.86453	1.72615	Asrgl1	protein_coding	asparaginase like 1 [Source:MGI Symbol;Acc:MGI:1913764]
ENSMUSG00000021711	1.01054	0.00115195	2.49635	1.47347	Trappc13	protein_coding	trafficking protein particle complex 13 [Source:MGI Symbol;Acc:MGI:1914225]
ENSMUSG00000014776	0.735754	0.00115295	2.54998	1.80432	Nol3	protein_coding	nucleolar protein 3 (apoptosis repressor with CARD domain) [Source:MGI Symbol;Acc:MGI:1925938]
ENSMUSG00000029478	0.537874	0.00115365	1.19225	0.643164	Ncor2	protein_coding	nuclear receptor co-repressor 2 [Source:MGI Symbol;Acc:MGI:1337080]
ENSMUSG00000003809	1.01234	0.00117947	3.83274	2.80548	Gcdh	protein_coding	glutaryl-Coenzyme A dehydrogenase [Source:MGI Symbol;Acc:MGI:104541]
ENSMUSG00000033701	1.29816	0.00119101	2.90177	1.59466	Acbd6	protein_coding	acyl-Coenzyme A binding domain containing 6 [Source:MGI Symbol;Acc:MGI:1919732]
ENSMUSG00000042520	1.10133	0.00119101	3.6026	2.48611	Ubap2l	protein_coding	ubiquitin-associated protein 2-like [Source:MGI Symbol;Acc:MGI:1921633]
ENSMUSG00000020189	0.779458	0.00119101	3.31678	2.52454	Osbpl8	protein_coding	oxysterol binding protein-like 8 [Source:MGI Symbol;Acc:MGI:2443807]
ENSMUSG00000036181	1.14072	0.0011914	4.03519	2.87958	Hist1h1c	protein_coding	histone cluster 1, H1c [Source:MGI Symbol;Acc:MGI:1931526]
ENSMUSG00000030272	0.804489	0.00120335	2.6885	1.8736	Camk1	protein_coding	calcium/calmodulin-dependent protein kinase I [Source:MGI Symbol;Acc:MGI:1098535]
ENSMUSG00000050188	0.282343	0.00120335	1.39287	1.10087	Lsm10	protein_coding	U7 snRNP-specific Sm-like protein LSM10 [Source:MGI Symbol;Acc:MGI:2151045]
ENSMUSG00000026427	0.231501	0.00120335	0.854799	0.61494	Eif2d	protein_coding	eukaryotic translation initiation factor 2D [Source:MGI Symbol;Acc:MGI:109342]
ENSMUSG00000020132	1.23041	0.00122905	3.94239	2.69876	Rab21	protein_coding	RAB21, member RAS oncogene family [Source:MGI Symbol;Acc:MGI:894308]
ENSMUSG00000020034	1.02086	0.00122905	3.60372	2.56916	Tcp11l2	protein_coding	t-complex 11 (mouse) like 2 [Source:MGI Symbol;Acc:MGI:2444679]
ENSMUSG00000039018	0.858538	0.00122905	1.717	0.850529	Mtg1	protein_coding	mitochondrial ribosome-associated GTPase 1 [Source:MGI Symbol;Acc:MGI:2685015]
ENSMUSG00000030137	0.716752	0.00122905	4.7552	4.01591	Tuba8	protein_coding	tubulin, alpha 8 [Source:MGI Symbol;Acc:MGI:1858225]
ENSMUSG00000028977	0.682463	0.00122905	2.37139	1.67913	Casz1	protein_coding	castor zinc finger 1 [Source:MGI Symbol;Acc:MGI:1196251]
ENSMUSG00000041035	0.647257	0.00122905	1.82272	1.16717	Gm17018	protein_coding	predicted gene 17018 [Source:MGI Symbol;Acc:MGI:4820566]
ENSMUSG00000067071	0.608188	0.00122905	0.951832	0.337063	Hes6	protein_coding	hairy and enhancer of split 6 [Source:MGI Symbol;Acc:MGI:1859852]
ENSMUSG00000039693	0.5878	0.00122905	1.05989	0.459446	Msantd3	protein_coding	Myb/SANT-like DNA-binding domain containing 3 [Source:MGI Symbol;Acc:MGI:1913915]
ENSMUSG00000013076	0.199447	0.00122905	1.7594	1.55286	Amotl1	protein_coding	angiomotin-like 1 [Source:MGI Symbol;Acc:MGI:1922973]
ENSMUSG00000038816	0.599625	0.00123876	1.15707	0.548911	Ctnnal1	protein_coding	catenin (cadherin associated protein), alpha-like 1 [Source:MGI Symbol;Acc:MGI:1859649]
ENSMUSG00000067924	0.585648	0.00125805	1.86834	1.27427	Rtl8b	protein_coding	retrotransposon Gag like 8B [Source:MGI Symbol;Acc:MGI:3576504]
ENSMUSG00000041731	0.604537	0.0012619	2.99487	2.37897	Pgm5	protein_coding	phosphoglucomutase 5 [Source:MGI Symbol;Acc:MGI:1925668]
ENSMUSG00000014905	0.6291	0.00126458	1.95382	1.31614	Dnajb9	protein_coding	DnaJ heat shock protein family (Hsp40) member B9 [Source:MGI Symbol;Acc:MGI:1351618]
ENSMUSG00000051149	0.818322	0.00128019	1.85066	1.02326	Adnp	protein_coding	activity-dependent neuroprotective protein [Source:MGI Symbol;Acc:MGI:1338758]
ENSMUSG00000024974	0.676491	0.00128019	2.22699	1.5408	Smc3	protein_coding	structural maintenance of chromosomes 3 [Source:MGI Symbol;Acc:MGI:1339795]
ENSMUSG00000006699	-0.0815355	0.00128768	2.90114	2.97402	Cdc42	protein_coding	cell division cycle 42 [Source:MGI Symbol;Acc:MGI:106211]
ENSMUSG00000026554	1.15401	0.00129048	4.36178	3.19088	Dcaf8	protein_coding	DDB1 and CUL4 associated factor 8 [Source:MGI Symbol;Acc:MGI:91860]
ENSMUSG00000002014	1.06572	0.00129048	3.36945	2.29086	Ssr4	protein_coding	signal sequence receptor, delta [Source:MGI Symbol;Acc:MGI:1099464]
ENSMUSG00000031753	0.933508	0.00129048	2.20009	1.25755	Cog4	protein_coding	component of oligomeric golgi complex 4 [Source:MGI Symbol;Acc:MGI:2142808]
ENSMUSG00000035891	0.834069	0.00129048	1.47724	0.636391	Cerk	protein_coding	ceramide kinase [Source:MGI Symbol;Acc:MGI:2386052]
ENSMUSG00000021188	0.689205	0.00129048	3.3596	2.65766	Trip11	protein_coding	thyroid hormone receptor interactor 11 [Source:MGI Symbol;Acc:MGI:1924393]
ENSMUSG00000024457	0.619757	0.00129048	0.733106	0.10093	Trim26	protein_coding	tripartite motif-containing 26 [Source:MGI Symbol;Acc:MGI:1337056]
ENSMUSG00000021820	0.477869	0.00129502	1.71973	1.23181	Camk2g	protein_coding	calcium/calmodulin-dependent protein kinase II gamma [Source:MGI Symbol;Acc:MGI:88259]
ENSMUSG00000021556	0.643844	0.00129551	1.77086	1.11751	Golm1	protein_coding	golgi membrane protein 1 [Source:MGI Symbol;Acc:MGI:1917329]
ENSMUSG00000050965	0.558063	0.00129551	1.33476	0.767931	Prkca	protein_coding	protein kinase C, alpha [Source:MGI Symbol;Acc:MGI:97595]
ENSMUSG00000028771	0.622622	0.0013093	0.89603	0.265335	Ptpn12	protein_coding	protein tyrosine phosphatase, non-receptor type 12 [Source:MGI Symbol;Acc:MGI:104673]
ENSMUSG00000024740	0.965715	0.00132212	3.57713	2.59769	Ddb1	protein_coding	damage specific DNA binding protein 1 [Source:MGI Symbol;Acc:MGI:1202384]
ENSMUSG00000029403	0.419626	0.00132566	0.781124	0.346257	Cdkl2	protein_coding	cyclin-dependent kinase-like 2 (CDC2-related kinase) [Source:MGI Symbol;Acc:MGI:1858227]
ENSMUSG00000023353	0.344436	0.0013282	0.995532	0.644782	Agap3	protein_coding	ArfGAP with GTPase domain, ankyrin repeat and PH domain 3 [Source:MGI Symbol;Acc:MGI:2183446]
ENSMUSG00000031922	0.893136	0.00133529	1.35163	0.447893	Cep57	protein_coding	centrosomal protein 57 [Source:MGI Symbol;Acc:MGI:1915551]
ENSMUSG00000018585	1.18537	0.00133651	3.87486	2.67615	Atox1	protein_coding	antioxidant 1 copper chaperone [Source:MGI Symbol;Acc:MGI:1333855]
ENSMUSG00000022781	0.921481	0.00133938	1.70324	0.773563	Pak2	protein_coding	p21 protein (Cdc42/Rac)-activated kinase 2 [Source:MGI Symbol;Acc:MGI:1339984]
ENSMUSG00000014856	0.88955	0.00135075	1.52205	0.624751	Tmem208	protein_coding	transmembrane protein 208 [Source:MGI Symbol;Acc:MGI:1913570]
ENSMUSG00000025027	0.854975	0.00135075	1.74187	0.879762	Xpnpep1	protein_coding	X-prolyl aminopeptidase (aminopeptidase P) 1, soluble [Source:MGI Symbol;Acc:MGI:2180003]
ENSMUSG00000021555	0.868116	0.0013551	2.94944	2.06981	Naa35	protein_coding	N(alpha)-acetyltransferase 35, NatC auxiliary subunit [Source:MGI Symbol;Acc:MGI:1925939]
ENSMUSG00000030161	0.672355	0.0013551	2.70182	2.01915	Gabarapl1	protein_coding	gamma-aminobutyric acid (GABA) A receptor-associated protein-like 1 [Source:MGI Symbol;Acc:MGI:1914980]
ENSMUSG00000026309	0.621294	0.0013551	2.09764	1.46759	Ilkap	protein_coding	integrin-linked kinase-associated serine/threonine phosphatase 2C [Source:MGI Symbol;Acc:MGI:1914694]
ENSMUSG00000043415	0.484951	0.0013551	1.88999	1.39654	Otud1	protein_coding	OTU domain containing 1 [Source:MGI Symbol;Acc:MGI:1918448]
ENSMUSG00000032966	1.07429	0.00137898	3.40708	2.32139	Fkbp1a	protein_coding	FK506 binding protein 1a [Source:MGI Symbol;Acc:MGI:95541]
ENSMUSG00000018428	1.11135	0.00139352	4.579	3.44936	Akap1	protein_coding	A kinase (PRKA) anchor protein 1 [Source:MGI Symbol;Acc:MGI:104729]
ENSMUSG00000023952	0.498246	0.0014094	1.18143	0.675954	Gtpbp2	protein_coding	GTP binding protein 2 [Source:MGI Symbol;Acc:MGI:1860138]
ENSMUSG00000028080	0.752036	0.00141053	1.5834	0.819908	Lrba	protein_coding	LPS-responsive beige-like anchor [Source:MGI Symbol;Acc:MGI:1933162]
ENSMUSG00000015112	1.42582	0.0014191	4.44691	3.00788	Slc25a13	protein_coding	solute carrier family 25 (mitochondrial carrier, adenine nucleotide translocator), member 13 [Source:MGI Symbol;Acc:MGI:1354721]
ENSMUSG00000000149	0.249303	0.0014191	2.63268	2.3742	Gna12	protein_coding	guanine nucleotide binding protein, alpha 12 [Source:MGI Symbol;Acc:MGI:95767]
ENSMUSG00000000275	0.226725	0.0014191	0.591827	0.355311	Trim25	protein_coding	tripartite motif-containing 25 [Source:MGI Symbol;Acc:MGI:102749]
ENSMUSG00000036168	0.649855	0.00143329	1.63211	0.974301	Ccdc38	protein_coding	coiled-coil domain containing 38 [Source:MGI Symbol;Acc:MGI:2444738]
ENSMUSG00000028932	0.85812	0.00144336	3.7793	2.90593	Psmc2	protein_coding	proteasome (prosome, macropain) 26S subunit, ATPase 2 [Source:MGI Symbol;Acc:MGI:109555]
ENSMUSG00000048920	0.11412	0.00144989	1.21141	1.0915	Fkrp	protein_coding	fukutin related protein [Source:MGI Symbol;Acc:MGI:2447586]
ENSMUSG00000025484	0.449498	0.00145569	0.767107	0.301336	Bet1l	protein_coding	Bet1 golgi vesicular membrane trafficking protein like [Source:MGI Symbol;Acc:MGI:1913128]
ENSMUSG00000038400	0.643917	0.00146033	1.73991	1.08775	Pmepa1	protein_coding	prostate transmembrane protein, androgen induced 1 [Source:MGI Symbol;Acc:MGI:1929600]
ENSMUSG00000037608	1.04127	0.00146507	3.95281	2.89664	Bclaf1	protein_coding	BCL2-associated transcription factor 1 [Source:MGI Symbol;Acc:MGI:1917580]
ENSMUSG00000037706	1.0289	0.00146507	4.24478	3.19866	Cd81	protein_coding	CD81 antigen [Source:MGI Symbol;Acc:MGI:1096398]
ENSMUSG00000022466	0.758634	0.00146507	1.57837	0.811332	Rpap3	protein_coding	RNA polymerase II associated protein 3 [Source:MGI Symbol;Acc:MGI:1277218]
ENSMUSG00000027108	0.738934	0.00146507	3.32621	2.57474	Ola1	protein_coding	Obg-like ATPase 1 [Source:MGI Symbol;Acc:MGI:1914309]
ENSMUSG00000063200	0.725261	0.00146507	3.89759	3.15721	Nol7	protein_coding	nucleolar protein 7 [Source:MGI Symbol;Acc:MGI:1917328]
ENSMUSG00000019883	0.608804	0.00146507	1.97156	1.35306	Echdc1	protein_coding	enoyl Coenzyme A hydratase domain containing 1 [Source:MGI Symbol;Acc:MGI:1277169]
ENSMUSG00000054823	0.45318	0.00146507	0.757469	0.291894	Nsd3	protein_coding	nuclear receptor binding SET domain protein 3 [Source:MGI Symbol;Acc:MGI:2142581]
ENSMUSG00000061778	NA	0.00146507	0.361895	0	Mospd2	protein_coding	motile sperm domain containing 2 [Source:MGI Symbol;Acc:MGI:1924013]
ENSMUSG00000034748	0.344388	0.00146587	0.499249	0.142151	Sirt6	protein_coding	sirtuin 6 [Source:MGI Symbol;Acc:MGI:1354161]
ENSMUSG00000021811	0.334073	0.00147818	0.915569	0.572986	Dnajc9	protein_coding	DnaJ heat shock protein family (Hsp40) member C9 [Source:MGI Symbol;Acc:MGI:1915326]
ENSMUSG00000014470	0.552864	0.0014955	1.82776	1.26693	Rnf166	protein_coding	ring finger protein 166 [Source:MGI Symbol;Acc:MGI:1915968]
ENSMUSG00000070283	0.826045	0.00150264	2.47885	1.64297	Ndufaf3	protein_coding	NADH dehydrogenase (ubiquinone) 1 alpha subcomplex, assembly factor 3 [Source:MGI Symbol;Acc:MGI:1913956]
ENSMUSG00000021149	1.07642	0.00150284	2.4354	1.34919	Gtpbp4	protein_coding	GTP binding protein 4 [Source:MGI Symbol;Acc:MGI:1916487]
ENSMUSG00000106864	-0.00366323	0.00150284	0.873842	0.872123	Gtf3c2	protein_coding	general transcription factor IIIC, polypeptide 2, beta [Source:MGI Symbol;Acc:MGI:1919002]
ENSMUSG00000030753	1.03421	0.00151531	3.85207	2.80325	Thap12	protein_coding	THAP domain containing 12 [Source:MGI Symbol;Acc:MGI:1920231]
ENSMUSG00000002329	0.423893	0.00151531	2.82555	2.39135	Mdp1	protein_coding	magnesium-dependent phosphatase 1 [Source:MGI Symbol;Acc:MGI:1915131]
ENSMUSG00000101892	0.505124	0.00151637	0.790466	0.276229	9130401M01Rik	protein_coding	RIKEN cDNA 9130401M01 gene [Source:MGI Symbol;Acc:MGI:1923008]
ENSMUSG00000030609	0.312143	0.00151637	2.82323	2.50126	Aen	protein_coding	apoptosis enhancing nuclease [Source:MGI Symbol;Acc:MGI:1915298]
ENSMUSG00000070738	0.158891	0.00151637	0.804216	0.638452	Dgkd	protein_coding	diacylglycerol kinase, delta [Source:MGI Symbol;Acc:MGI:2138334]
ENSMUSG00000013236	0.851516	0.0015256	2.23542	1.37314	Ptprs	protein_coding	protein tyrosine phosphatase, receptor type, S [Source:MGI Symbol;Acc:MGI:97815]
ENSMUSG00000021604	0.763128	0.00153031	1.65405	0.88055	Irx4	protein_coding	Iroquois related homeobox 4 (Drosophila) [Source:MGI Symbol;Acc:MGI:1355275]
ENSMUSG00000022707	0.642891	0.00153031	3.07548	2.42076	Gbe1	protein_coding	glucan (1,4-alpha-), branching enzyme 1 [Source:MGI Symbol;Acc:MGI:1921435]
ENSMUSG00000020571	0.198548	0.00153031	2.06896	1.86264	Pdia6	protein_coding	protein disulfide isomerase associated 6 [Source:MGI Symbol;Acc:MGI:1919103]
ENSMUSG00000034781	0.0633577	0.00153031	1.5607	1.49118	Gna11	protein_coding	guanine nucleotide binding protein, alpha 11 [Source:MGI Symbol;Acc:MGI:95766]
ENSMUSG00000027777	1.1428	0.00153618	5.66801	4.50282	Schip1	protein_coding	schwannomin interacting protein 1 [Source:MGI Symbol;Acc:MGI:1353557]
ENSMUSG00000066839	0.867965	0.00153618	4.35147	3.46744	Ecsit	protein_coding	ECSIT signalling integrator [Source:MGI Symbol;Acc:MGI:1349469]
ENSMUSG00000031060	0.804861	0.00153618	1.35587	0.536825	Rbm10	protein_coding	RNA binding motif protein 10 [Source:MGI Symbol;Acc:MGI:2384310]
ENSMUSG00000022338	0.763067	0.00153618	3.38765	2.6116	Eny2	protein_coding	enhancer of yellow 2 homolog (Drosophila) [Source:MGI Symbol;Acc:MGI:1919286]
ENSMUSG00000047514	1.04979	0.00153625	3.46664	2.40439	Tspyl1	protein_coding	testis-specific protein, Y-encoded-like 1 [Source:MGI Symbol;Acc:MGI:1298395]
ENSMUSG00000057497	0.817669	0.00153625	2.34007	1.51312	Fam136a	protein_coding	family with sequence similarity 136, member A [Source:MGI Symbol;Acc:MGI:1913738]
ENSMUSG00000029415	0.615838	0.00153625	1.10625	0.482323	Sdad1	protein_coding	SDA1 domain containing 1 [Source:MGI Symbol;Acc:MGI:2140779]
ENSMUSG00000027076	0.703638	0.00156237	3.07728	2.36209	Timm10	protein_coding	translocase of inner mitochondrial membrane 10 [Source:MGI Symbol;Acc:MGI:1353429]
ENSMUSG00000021716	0.522708	0.00156786	2.05817	1.52689	Srek1ip1	protein_coding	splicing regulatory glutamine/lysine-rich protein 1interacting protein 1 [Source:MGI Symbol;Acc:MGI:1914538]
ENSMUSG00000037933	1.32066	0.00156875	3.50774	2.17414	Bicd2	protein_coding	bicaudal D homolog 2 (Drosophila) [Source:MGI Symbol;Acc:MGI:1924145]
ENSMUSG00000025228	0.388527	0.00157765	2.21273	1.81584	Actr1a	protein_coding	ARP1 actin-related protein 1A, centractin alpha [Source:MGI Symbol;Acc:MGI:1858964]
ENSMUSG00000064145	0.471839	0.00161202	1.56174	1.0824	Arih2	protein_coding	ariadne RBR E3 ubiquitin protein ligase 2 [Source:MGI Symbol;Acc:MGI:1344361]
ENSMUSG00000065979	0.854942	0.00161603	3.38439	2.51667	Cpped1	protein_coding	calcineurin-like phosphoesterase domain containing 1 [Source:MGI Symbol;Acc:MGI:2443300]
ENSMUSG00000043336	0.245549	0.00164314	1.50312	1.24898	Filip1l	protein_coding	filamin A interacting protein 1-like [Source:MGI Symbol;Acc:MGI:1925999]
ENSMUSG00000001151	1.00638	0.00165949	3.15187	2.13344	Pcnt	protein_coding	pericentrin (kendrin) [Source:MGI Symbol;Acc:MGI:102722]
ENSMUSG00000022255	0.964674	0.00165949	3.33434	2.35734	Mtdh	protein_coding	metadherin [Source:MGI Symbol;Acc:MGI:1914404]
ENSMUSG00000044066	0.377357	0.00165949	1.00876	0.623087	Cep68	protein_coding	centrosomal protein 68 [Source:MGI Symbol;Acc:MGI:2667663]
ENSMUSG00000026123	0.358983	0.00165949	3.01332	2.64347	Plekhb2	protein_coding	pleckstrin homology domain containing, family B (evectins) member 2 [Source:MGI Symbol;Acc:MGI:2385825]
ENSMUSG00000038204	0.31639	0.00165949	2.04609	1.72221	Asb10	protein_coding	ankyrin repeat and SOCS box-containing 10 [Source:MGI Symbol;Acc:MGI:2152836]
ENSMUSG00000049115	0.359753	0.00166189	2.09712	1.72902	Agtr1a	protein_coding	angiotensin II receptor, type 1a [Source:MGI Symbol;Acc:MGI:87964]
ENSMUSG00000063412	0.678807	0.00167633	1.52362	0.83751	Gm10131	protein_coding	predicted pseudogene 10131 [Source:MGI Symbol;Acc:MGI:3704308]
ENSMUSG00000035203	0.749063	0.00168201	3.23088	2.4698	Epn1	protein_coding	epsin 1 [Source:MGI Symbol;Acc:MGI:1333763]
ENSMUSG00000037110	0.833822	0.00168808	2.38525	1.54158	Ralgapa2	protein_coding	Ral GTPase activating protein, alpha subunit 2 (catalytic) [Source:MGI Symbol;Acc:MGI:3036245]
ENSMUSG00000057278	0.807739	0.00168808	1.86589	1.04986	Snrpg	protein_coding	small nuclear ribonucleoprotein polypeptide G [Source:MGI Symbol;Acc:MGI:1915261]
ENSMUSG00000002103	-0.103962	0.00169188	0.704089	0.803995	Acp2	protein_coding	acid phosphatase 2, lysosomal [Source:MGI Symbol;Acc:MGI:87882]
ENSMUSG00000024958	0.881466	0.001697	1.48066	0.587223	Gpr137	protein_coding	G protein-coupled receptor 137 [Source:MGI Symbol;Acc:MGI:2147529]
ENSMUSG00000028820	0.763813	0.001697	2.19573	1.42283	Sfpq	protein_coding	splicing factor proline/glutamine rich (polypyrimidine tract binding protein associated) [Source:MGI Symbol;Acc:MGI:1918764]
ENSMUSG00000034875	0.666403	0.001697	2.94746	2.27005	Nudt19	protein_coding	nudix (nucleoside diphosphate linked moiety X)-type motif 19 [Source:MGI Symbol;Acc:MGI:94203]
ENSMUSG00000040354	0.609086	0.00171408	2.09029	1.47259	Mars	protein_coding	methionine-tRNA synthetase [Source:MGI Symbol;Acc:MGI:1345633]
ENSMUSG00000028445	-0.0164054	0.00171976	0.855149	0.866045	Enho	protein_coding	energy homeostasis associated [Source:MGI Symbol;Acc:MGI:1916888]
ENSMUSG00000029610	0.92166	0.00173987	1.98966	1.05793	Aimp2	protein_coding	aminoacyl tRNA synthetase complex-interacting multifunctional protein 2 [Source:MGI Symbol;Acc:MGI:2385237]
ENSMUSG00000039703	0.994778	0.00174039	2.83692	1.83145	Nploc4	protein_coding	NPL4 homolog, ubiquitin recognition factor [Source:MGI Symbol;Acc:MGI:2679787]
ENSMUSG00000019851	1.07242	0.00174563	5.32714	4.22897	Perp	protein_coding	PERP, TP53 apoptosis effector [Source:MGI Symbol;Acc:MGI:1929938]
ENSMUSG00000031575	0.879992	0.00174563	1.96215	1.07021	Ash2l	protein_coding	ash2 (absent, small, or homeotic)-like (Drosophila) [Source:MGI Symbol;Acc:MGI:1344416]
ENSMUSG00000042165	0.3585	0.00174563	3.37628	3.00505	Gm9774	protein_coding	predicted pseudogene 9774 [Source:MGI Symbol;Acc:MGI:3642386]
ENSMUSG00000021792	0.845213	0.00176834	2.20712	1.35212	Fam213a	protein_coding	family with sequence similarity 213, member A [Source:MGI Symbol;Acc:MGI:1917814]
ENSMUSG00000038324	0.673275	0.00179107	2.77568	2.09177	Trpc4ap	protein_coding	transient receptor potential cation channel, subfamily C, member 4 associated protein [Source:MGI Symbol;Acc:MGI:1930751]
ENSMUSG00000020792	1.08921	0.00179509	2.74317	1.64196	Exoc7	protein_coding	exocyst complex component 7 [Source:MGI Symbol;Acc:MGI:1859270]
ENSMUSG00000035776	1.30219	0.0018125	3.71878	2.40389	Cd99l2	protein_coding	CD99 antigen-like 2 [Source:MGI Symbol;Acc:MGI:2177151]
ENSMUSG00000039515	0.987505	0.0018125	1.97302	0.977242	Ptpa	protein_coding	protein phosphatase 2 protein activator [Source:MGI Symbol;Acc:MGI:1346006]
ENSMUSG00000020859	1.60087	0.00183076	5.28257	3.66468	Spag9	protein_coding	sperm associated antigen 9 [Source:MGI Symbol;Acc:MGI:1918084]
ENSMUSG00000025666	0.0818234	0.00183076	0.443063	0.352088	Tmem47	protein_coding	transmembrane protein 47 [Source:MGI Symbol;Acc:MGI:2177570]
ENSMUSG00000074794	0.110646	0.001844	0.979301	0.861739	Arrdc3	protein_coding	arrestin domain containing 3 [Source:MGI Symbol;Acc:MGI:2145242]
ENSMUSG00000026082	0.482455	0.00185743	0.742623	0.249028	Rev1	protein_coding	REV1, DNA directed polymerase [Source:MGI Symbol;Acc:MGI:1929074]
ENSMUSG00000036186	0.180763	0.00185743	0.897315	0.709361	Fam69b	protein_coding	family with sequence similarity 69, member B [Source:MGI Symbol;Acc:MGI:1927576]
ENSMUSG00000019518	0.601905	0.00185989	1.04721	0.435568	Ap4m1	protein_coding	adaptor-related protein complex AP-4, mu 1 [Source:MGI Symbol;Acc:MGI:1337063]
ENSMUSG00000050199	0.776983	0.00186275	1.75863	0.972831	Lgr4	protein_coding	leucine-rich repeat-containing G protein-coupled receptor 4 [Source:MGI Symbol;Acc:MGI:1891468]
ENSMUSG00000031958	0.569025	0.00187874	1.16725	0.591108	Ldhd	protein_coding	lactate dehydrogenase D [Source:MGI Symbol;Acc:MGI:106428]
ENSMUSG00000004069	1.19856	0.00187945	4.72563	3.50934	Dnaja3	protein_coding	DnaJ heat shock protein family (Hsp40) member A3 [Source:MGI Symbol;Acc:MGI:1933786]
ENSMUSG00000025979	0.830337	0.00187945	2.60205	1.76139	Mob4	protein_coding	MOB family member 4, phocein [Source:MGI Symbol;Acc:MGI:104899]
ENSMUSG00000000600	0.702433	0.00187945	1.84647	1.13394	Krit1	protein_coding	KRIT1, ankyrin repeat containing [Source:MGI Symbol;Acc:MGI:1930618]
ENSMUSG00000038936	0.713689	0.00188084	2.66346	1.93976	Sccpdh	protein_coding	saccharopine dehydrogenase (putative) [Source:MGI Symbol;Acc:MGI:1924486]
ENSMUSG00000021131	0.695268	0.00188084	1.95079	1.24766	Erh	protein_coding	enhancer of rudimentary homolog (Drosophila) [Source:MGI Symbol;Acc:MGI:108089]
ENSMUSG00000025034	0.523012	0.00188084	1.3186	0.78763	Trim8	protein_coding	tripartite motif-containing 8 [Source:MGI Symbol;Acc:MGI:1933302]
ENSMUSG00000096887	-0.134334	0.00188084	1.47103	1.60117	Gm20594	protein_coding	predicted gene, 20594 [Source:MGI Symbol;Acc:MGI:5295700]
ENSMUSG00000018583	0.734434	0.00188388	3.05679	2.31106	G3bp1	protein_coding	GTPase activating protein (SH3 domain) binding protein 1 [Source:MGI Symbol;Acc:MGI:1351465]
ENSMUSG00000028572	0.510917	0.00188388	1.43685	0.917269	Hook1	protein_coding	hook microtubule tethering protein 1 [Source:MGI Symbol;Acc:MGI:1925213]
ENSMUSG00000055204	1.36128	0.00189007	4.88786	3.50881	Ankrd17	protein_coding	ankyrin repeat domain 17 [Source:MGI Symbol;Acc:MGI:1932101]
ENSMUSG00000024187	0.369787	0.00189007	3.3689	2.98745	Fam234a	protein_coding	family with sequence similarity 234, member A [Source:MGI Symbol;Acc:MGI:2146854]
ENSMUSG00000051671	0.890794	0.00190758	2.01398	1.11262	Coa6	protein_coding	cytochrome c oxidase assembly factor 6 [Source:MGI Symbol;Acc:MGI:1915142]
ENSMUSG00000025283	0.732569	0.00190758	1.5437	0.803649	Sat1	protein_coding	spermidine/spermine N1-acetyl transferase 1 [Source:MGI Symbol;Acc:MGI:98233]
ENSMUSG00000000959	0.540521	0.00190758	3.33712	2.78277	Oxa1l	protein_coding	oxidase assembly 1-like [Source:MGI Symbol;Acc:MGI:1916339]
ENSMUSG00000036450	0.504473	0.00192198	1.58148	1.06952	Hif1an	protein_coding	hypoxia-inducible factor 1, alpha subunit inhibitor [Source:MGI Symbol;Acc:MGI:2442345]
ENSMUSG00000031808	0.546081	0.00192592	2.52571	1.97016	Slc27a1	protein_coding	solute carrier family 27 (fatty acid transporter), member 1 [Source:MGI Symbol;Acc:MGI:1347098]
ENSMUSG00000042462	0.744429	0.00192977	1.84988	1.09696	Dctpp1	protein_coding	dCTP pyrophosphatase 1 [Source:MGI Symbol;Acc:MGI:1913672]
ENSMUSG00000028034	0.960683	0.0019382	2.65198	1.67929	Fubp1	protein_coding	far upstream element (FUSE) binding protein 1 [Source:MGI Symbol;Acc:MGI:1196294]
ENSMUSG00000029028	0.522186	0.0019382	1.34906	0.817551	Lrrc47	protein_coding	leucine rich repeat containing 47 [Source:MGI Symbol;Acc:MGI:1920196]
ENSMUSG00000028937	1.42633	0.00194101	5.10698	3.66406	Acot7	protein_coding	acyl-CoA thioesterase 7 [Source:MGI Symbol;Acc:MGI:1917275]
ENSMUSG00000000384	0.978954	0.00194163	3.06033	2.07072	Tbrg4	protein_coding	transforming growth factor beta regulated gene 4 [Source:MGI Symbol;Acc:MGI:1100868]
ENSMUSG00000000631	1.07113	0.0019476	6.74347	5.64335	Myo18a	protein_coding	myosin XVIIIA [Source:MGI Symbol;Acc:MGI:2667185]
ENSMUSG00000056153	1.06599	0.00196792	1.92275	0.846377	Socs6	protein_coding	suppressor of cytokine signaling 6 [Source:MGI Symbol;Acc:MGI:1924885]
ENSMUSG00000054309	0.530252	0.00200883	1.2914	0.753621	Cpsf3	protein_coding	cleavage and polyadenylation specificity factor 3 [Source:MGI Symbol;Acc:MGI:1859328]
ENSMUSG00000067925	0.286155	0.00200883	2.1951	1.90109	Rtl8a	protein_coding	retrotransposon Gag like 8A [Source:MGI Symbol;Acc:MGI:1913408]
ENSMUSG00000017776	0.83975	0.00201997	2.5615	1.71124	Crk	protein_coding	v-crk avian sarcoma virus CT10 oncogene homolog [Source:MGI Symbol;Acc:MGI:88508]
ENSMUSG00000078813	0.798259	0.00201997	2.08761	1.28049	Leng1	protein_coding	leukocyte receptor cluster (LRC) member 1 [Source:MGI Symbol;Acc:MGI:1917007]
ENSMUSG00000028838	0.434821	0.00203598	1.14702	0.704985	Extl1	protein_coding	exostoses (multiple)-like 1 [Source:MGI Symbol;Acc:MGI:1888742]
ENSMUSG00000031592	0.913424	0.0020372	3.54129	2.6146	Pcm1	protein_coding	pericentriolar material 1 [Source:MGI Symbol;Acc:MGI:1277958]
ENSMUSG00000020948	0.207108	0.0020372	0.399158	0.175851	Klhl28	protein_coding	kelch-like 28 [Source:MGI Symbol;Acc:MGI:1913939]
ENSMUSG00000000339	0.558895	0.00203759	1.41484	0.848674	Rtca	protein_coding	RNA 3'-terminal phosphate cyclase [Source:MGI Symbol;Acc:MGI:1913618]
ENSMUSG00000030521	0.806815	0.002051	1.46224	0.646529	Mphosph10	protein_coding	M-phase phosphoprotein 10 (U3 small nucleolar ribonucleoprotein) [Source:MGI Symbol;Acc:MGI:1915223]
ENSMUSG00000042608	0.764917	0.00205911	2.59007	1.81471	Stk40	protein_coding	serine/threonine kinase 40 [Source:MGI Symbol;Acc:MGI:1921428]
ENSMUSG00000020530	1.1982	0.00205921	4.45233	3.23776	Ggnbp2	protein_coding	gametogenetin binding protein 2 [Source:MGI Symbol;Acc:MGI:2387356]
ENSMUSG00000031586	1.11234	0.00205921	4.36703	3.23853	Rbpms	protein_coding	RNA binding protein gene with multiple splicing [Source:MGI Symbol;Acc:MGI:1334446]
ENSMUSG00000016664	0.544067	0.00205921	5.51534	4.94998	Pacsin2	protein_coding	protein kinase C and casein kinase substrate in neurons 2 [Source:MGI Symbol;Acc:MGI:1345153]
ENSMUSG00000102422	0.648142	0.00206722	3.57372	2.91321	Gm21949	protein_coding	predicted gene, 21949 [Source:MGI Symbol;Acc:MGI:5439400]
ENSMUSG00000025937	0.391288	0.00207121	1.22197	0.823381	Lactb2	protein_coding	lactamase, beta 2 [Source:MGI Symbol;Acc:MGI:2442551]
ENSMUSG00000020516	0.400098	0.00207932	2.02558	1.61725	Rps6kb1	protein_coding	ribosomal protein S6 kinase, polypeptide 1 [Source:MGI Symbol;Acc:MGI:1270849]
ENSMUSG00000028974	0.614336	0.0020798	1.28499	0.662524	Dffa	protein_coding	DNA fragmentation factor, alpha subunit [Source:MGI Symbol;Acc:MGI:1196227]
ENSMUSG00000038650	1.01476	0.00208364	2.33285	1.30771	Rnh1	protein_coding	ribonuclease/angiogenin inhibitor 1 [Source:MGI Symbol;Acc:MGI:1195456]
ENSMUSG00000034667	0.824668	0.00208364	1.92437	1.0898	Xpot	protein_coding	exportin, tRNA (nuclear export receptor for tRNAs) [Source:MGI Symbol;Acc:MGI:1920442]
ENSMUSG00000022698	0.813176	0.00208364	3.98969	3.16183	Naa50	protein_coding	N(alpha)-acetyltransferase 50, NatE catalytic subunit [Source:MGI Symbol;Acc:MGI:1919367]
ENSMUSG00000001542	0.443818	0.00208364	0.916841	0.463732	Ell2	protein_coding	elongation factor RNA polymerase II 2 [Source:MGI Symbol;Acc:MGI:2183438]
ENSMUSG00000020677	0.18626	0.00208364	0.864142	0.670495	Ddx52	protein_coding	DEAD (Asp-Glu-Ala-Asp) box polypeptide 52 [Source:MGI Symbol;Acc:MGI:1925644]
ENSMUSG00000022906	0.638744	0.00209746	0.97968	0.327807	Parp9	protein_coding	poly (ADP-ribose) polymerase family, member 9 [Source:MGI Symbol;Acc:MGI:1933117]
ENSMUSG00000022708	0.911105	0.00210888	7.34181	6.3832	Zbtb20	protein_coding	zinc finger and BTB domain containing 20 [Source:MGI Symbol;Acc:MGI:1929213]
ENSMUSG00000031823	0.630571	0.00211175	1.4947	0.856944	Zdhhc7	protein_coding	zinc finger, DHHC domain containing 7 [Source:MGI Symbol;Acc:MGI:2142662]
ENSMUSG00000020496	0.9493	0.00213562	4.18367	3.2178	Rnf187	protein_coding	ring finger protein 187 [Source:MGI Symbol;Acc:MGI:1914224]
ENSMUSG00000034252	0.919745	0.00214598	3.76967	2.83617	Senp6	protein_coding	SUMO/sentrin specific peptidase 6 [Source:MGI Symbol;Acc:MGI:1922075]
ENSMUSG00000016503	0.410189	0.00214969	1.47143	1.05168	Gtf3a	protein_coding	general transcription factor III A [Source:MGI Symbol;Acc:MGI:1913846]
ENSMUSG00000008301	0.787535	0.00215082	1.44975	0.651139	Phax	protein_coding	phosphorylated adaptor for RNA export [Source:MGI Symbol;Acc:MGI:1891839]
ENSMUSG00000064373	0.963169	0.0021611	3.50176	2.52569	Selenop	protein_coding	selenoprotein P [Source:MGI Symbol;Acc:MGI:894288]
ENSMUSG00000026276	0.0371243	0.00221359	2.44096	2.39701	Sept2	protein_coding	septin 2 [Source:MGI Symbol;Acc:MGI:97298]
ENSMUSG00000047843	0.976175	0.00221998	5.53713	4.53279	Bri3	protein_coding	brain protein I3 [Source:MGI Symbol;Acc:MGI:1933174]
ENSMUSG00000032560	0.229135	0.00221998	1.42364	1.18772	Dnajc13	protein_coding	DnaJ heat shock protein family (Hsp40) member C13 [Source:MGI Symbol;Acc:MGI:2676368]
ENSMUSG00000032563	1.26428	0.0022527	4.21443	2.93828	Mrpl3	protein_coding	mitochondrial ribosomal protein L3 [Source:MGI Symbol;Acc:MGI:2137204]
ENSMUSG00000027763	0.903105	0.00227156	6.43662	5.50528	Mbnl1	protein_coding	muscleblind like splicing factor 1 [Source:MGI Symbol;Acc:MGI:1928482]
ENSMUSG00000034757	0.393397	0.00227156	0.969436	0.566958	Tmub2	protein_coding	transmembrane and ubiquitin-like domain containing 2 [Source:MGI Symbol;Acc:MGI:1919303]
ENSMUSG00000054612	0.365867	0.00227156	1.23175	0.858534	Mgmt	protein_coding	O-6-methylguanine-DNA methyltransferase [Source:MGI Symbol;Acc:MGI:96977]
ENSMUSG00000052934	0.824179	0.00227194	2.98739	2.15246	Fbxo31	protein_coding	F-box protein 31 [Source:MGI Symbol;Acc:MGI:1354708]
ENSMUSG00000044221	1.26204	0.00227463	5.84462	4.56332	Grsf1	protein_coding	G-rich RNA sequence binding factor 1 [Source:MGI Symbol;Acc:MGI:106479]
ENSMUSG00000024892	0.739278	0.00227463	1.58679	0.837786	Pcx	protein_coding	pyruvate carboxylase [Source:MGI Symbol;Acc:MGI:97520]
ENSMUSG00000010406	0.979456	0.00227807	4.30457	3.30868	Mrpl52	protein_coding	mitochondrial ribosomal protein L52 [Source:MGI Symbol;Acc:MGI:1916086]
ENSMUSG00000026028	1.1714	0.0022866	5.25945	4.06956	Trak2	protein_coding	trafficking protein, kinesin binding 2 [Source:MGI Symbol;Acc:MGI:1918077]
ENSMUSG00000001416	1.2186	0.00229742	4.92741	3.69049	Cct3	protein_coding	chaperonin containing Tcp1, subunit 3 (gamma) [Source:MGI Symbol;Acc:MGI:104708]
ENSMUSG00000022684	1.38051	0.00230874	4.11583	2.72164	Bfar	protein_coding	bifunctional apoptosis regulator [Source:MGI Symbol;Acc:MGI:1914368]
ENSMUSG00000032667	0.542821	0.00230874	1.89818	1.34765	Pon2	protein_coding	paraoxonase 2 [Source:MGI Symbol;Acc:MGI:106687]
[truncated: 1,486 more rows]
